# Supplementary material for: Taxonomic Structure and Wing Pattern Evolution in the <em>Parnassius mnemosyne </em>Species Complex (Lepidoptera, Papilionidae)
Source: Preprints.org preprint supplement (doi:10.20944/preprints202311.1419.v1), 2023-11-22
Supplement: Supplementary file 1 [file Supplementary_Material_01.xlsx]

## Sheet: Лист1
Process ID	Sample ID	Field ID	COI-5P Seq. Length	COI-5P Trace Count	Haplotype	Collection Date	Identification	Institution	Collectors	Country/Ocean	State/Province	Region	Sector	Exact Site	Lat (N)	Lon €	Elev
LOWAM001-08	VL-J001	J001	658[0n]	2	gig1	16-Jul-1993	mnemosyne	Russian Academy of Sciences, Zoological Institute	V. Lukhtanov leg.	Kyrgyzstan		Alai Mts		Chak			3000
LOWAM002-08	VL-J002	J002	658[1n]	2	gig1	16-Jul-1993	mnemosyne	Russian Academy of Sciences, Zoological Institute	V. Lukhtanov leg.	Kyrgyzstan		Alai Mts		Chak			3000
LOWAM003-08	VL-J003	J003	658[0n]	2	gig1	16-Jul-1993	mnemosyne	Russian Academy of Sciences, Zoological Institute	V. Lukhtanov leg.	Kyrgyzstan		Alai Mts		Chak			3000
LOWAM004-08	VL-J004	J004	658[0n]	2	gig2	20-Jun-1994	mnemosyne	Russian Academy of Sciences, Zoological Institute	V. Lukhtanov leg.	Uzbekistan		Gissar Mts		Tamshush			3000
LOWAM005-08	VL-J005	J005	658[0n]	2	gig2	20-Jun-1994	mnemosyne	Russian Academy of Sciences, Zoological Institute	V. Lukhtanov leg.	Uzbekistan		Gissar Mts		Tamshush			3000
LOWAM006-08	VL-J006	J006	658[0n]	2	gig2	20-Jun-1994	mnemosyne	Russian Academy of Sciences, Zoological Institute	V. Lukhtanov leg.	Uzbekistan		Gissar Mts		Tamshush			3000
LOWAM007-08	VL-J007	J007	658[0n]	2	ori1	25-Jun-1995	mnemosyne	Russian Academy of Sciences, Zoological Institute	V. Lukhtanov leg.	Kyrgyzstan		Moldatoo Mts					2800
LOWAM008-08	VL-J008	J008	658[0n]	2	ori1	25-Jun-1995	mnemosyne	Russian Academy of Sciences, Zoological Institute	V. Lukhtanov leg.	Kyrgyzstan		Moldatoo Mts					2800
LOWAM009-08	VL-J009	J009	658[0n]	2	ori2	25-Jun-1995	mnemosyne	Russian Academy of Sciences, Zoological Institute	V. Lukhtanov leg.	Kyrgyzstan		Moldatoo Mts					2800
LOWAM010-08	VL-J010	J010	658[0n]	2	gig2	13-May-1994	mnemosyne	Russian Academy of Sciences, Zoological Institute	V. Lukhtanov leg.	Tajikistan		Turkestanski Mts		Amondara			1600
LOWAM011-08	VL-J011	J011	658[0n]	2	gig2	13-May-1994	mnemosyne	Russian Academy of Sciences, Zoological Institute	V. Lukhtanov leg.	Tajikistan		Turkestanski Mts		Amondara			1600
LOWAM012-08	VL-J012	J012	658[0n]	2	gig2	13-May-1994	mnemosyne	Russian Academy of Sciences, Zoological Institute	V. Lukhtanov leg.	Tajikistan		Turkestanski Mts		Amondara			1600
LOWAM013-08	VL-J013	J013	658[0n]	2	mne5	03-Aug-2001	mnemosyne	Russian Academy of Sciences, Zoological Institute	V. Lukhtanov leg.	Turkey				Ovitdagi Gecidi			2750
LOWAM014-08	VL-J014	J014	658[0n]	2	mne6	03-Aug-2001	mnemosyne	Russian Academy of Sciences, Zoological Institute	V. Lukhtanov leg.	Turkey				Ovitdagi Gecidi			2750
LOWAM015-08	VL-J015	J015	658[0n]	2	mne3	31-May-2001	mnemosyne	Russian Academy of Sciences, Zoological Institute		Russia		Don River		Kamyshinka			200
LOWAM016-08	VL-J016	J016	658[0n]	2	mne3	31-May-2001	mnemosyne	Russian Academy of Sciences, Zoological Institute		Russia		Don River		Kamyshinka			200
LOWAM017-08	VL-J017	J017	658[0n]	2	gig1	16-Jul-1995	mnemosyne	Russian Academy of Sciences, Zoological Institute	V. Lukhtanov leg.	Kyrgyzstan		Alai Mts		Karamyk			3050
LOWAM018-08	VL-J018	J018	658[0n]	2	gig6	16-Jul-1995	mnemosyne	Russian Academy of Sciences, Zoological Institute	V. Lukhtanov leg.	Kyrgyzstan		Alai Mts		Karamyk			3050
LOWAM019-08	VL-J019	J019	658[1n]	2	gig4	16-Jul-1995	mnemosyne	Russian Academy of Sciences, Zoological Institute	V. Lukhtanov leg.	Kyrgyzstan		Alai Mts		Karamyk			3050
LOWAM020-08	VL-J020	J020	658[0n]	2	mne3	27-May-1991	mnemosyne	Russian Academy of Sciences, Zoological Institute	A. Lukhtanov leg.	Russia	Saratovskaya Oblast			10 km NW Saratov
LOWAM021-08	VL-J021	J021	658[0n]	2	mne2	27-May-1991	mnemosyne	Russian Academy of Sciences, Zoological Institute	A. Lukhtanov leg.	Russia	Saratovskaya Oblast			10 km NW Saratov
LOWAM022-08	VL-J022	J022	658[0n]	2	mne3	27-May-1991	mnemosyne	Russian Academy of Sciences, Zoological Institute	A. Lukhtanov leg.	Russia	Saratovskaya Oblast			10 km NW Saratov
LOWAM023-08	VL-J023	J023	658[0n]	2	mne4	27-May-1991	mnemosyne	Russian Academy of Sciences, Zoological Institute	A. Lukhtanov leg.	Russia	Saratovskaya Oblast			100 km S Saratov
LOWAM024-08	VL-J024	J024	609[0n]	6	mne3	27-May-1991	mnemosyne	Russian Academy of Sciences, Zoological Institute	A. Lukhtanov leg.	Russia	Saratovskaya Oblast			100 km S Saratov
LOWAM025-08	VL-J025	J025	609[0n]	6	mne3	27-May-1991	mnemosyne	Russian Academy of Sciences, Zoological Institute	A. Lukhtanov leg.	Russia	Saratovskaya Oblast			100 km S Saratov
LOWAM026-08	VL-J026	J026	658[0n]	2	gig2	25-May-1994	mnemosyne	Russian Academy of Sciences, Zoological Institute		Uzbekistan		W Gissar Mts		40 km SE Shakhrisyabz			1900
LOWAM027-08	VL-J027	J027	658[0n]	2	ori3	11-May-1994	mnemosyne	Russian Academy of Sciences, Zoological Institute		Kazakhstan		Karatau Mts		Boyaldyr			1000
LOWAM028-08	VL-J028	J028	658[0n]	2	ori3	11-May-1994	mnemosyne	Russian Academy of Sciences, Zoological Institute		Kazakhstan		Karatau Mts		Boyaldyr			1000
LOWAM029-08	VL-J029	J029	658[0n]	2	gig2	15-May-1994	mnemosyne	Russian Academy of Sciences, Zoological Institute	V. Lukhtanov leg.	Tajikistan				Taribak			1200
LOWAM030-08	VL-J030	J030	658[0n]	2	gig2	15-May-1994	mnemosyne	Russian Academy of Sciences, Zoological Institute	V. Lukhtanov leg.	Tajikistan				Taribak			1200
LOWAM031-08	VL-J031	J031	658[0n]	2	gig2	15-May-1994	mnemosyne	Russian Academy of Sciences, Zoological Institute	V. Lukhtanov leg.	Tajikistan				Taribak			1200
LOWAM032-08	VL-J032	J032	658[0n]	2	gig2	17-May-1994	mnemosyne	Russian Academy of Sciences, Zoological Institute	V. Lukhtanov leg.	Uzbekistan		Nuratau Mts		Zarmitan			1300
LOWAM033-08	VL-J033	J033	658[0n]	2	gig2	17-May-1994	mnemosyne	Russian Academy of Sciences, Zoological Institute	V. Lukhtanov leg.	Uzbekistan		Nuratau Mts		Zarmitan			1300
LOWAM034-08	VL-J034	J034	658[0n]	2	gig2	17-May-1994	mnemosyne	Russian Academy of Sciences, Zoological Institute	V. Lukhtanov leg.	Uzbekistan		Nuratau Mts		Zarmitan			1300
LOWAM036-08	VL-J036	J036	578[1n]	4	mne2	01-Jul-1980	mnemosyne	Russian Academy of Sciences, Zoological Institute	V. Lukhtanov leg.	Russia	Pskovskaya Oblast	Pskovskaya Oblast		Vladimirskiy Lager			100
LOWAM037-08	VL-J037	J037	648[0n]	4	mne4	01-Jul-1980	mnemosyne	Russian Academy of Sciences, Zoological Institute	V. Lukhtanov leg.	Russia	Pskovskaya Oblast	Pskovskaya Oblast		Vladimirskiy Lager			100
LOWAM038-08	VL-J038	J038	658[0n]	2	ori4	06-Jul-1995	mnemosyne	Russian Academy of Sciences, Zoological Institute	V. Lukhtanov leg.	Kyrgyzstan		Kirgizsky Khrebet		Tyuz-Ashu Pass, south slope			2700
LOWAM039-08	VL-J039	J039	658[0n]	2	ori5	06-Jul-1995	mnemosyne	Russian Academy of Sciences, Zoological Institute	V. Lukhtanov leg.	Kyrgyzstan		Kirgizsky Khrebet		Tyuz-Ashu Pass, south slope			2700
LOWAM040-08	VL-J040	J040	658[0n]	2	ori4	06-Jul-1995	mnemosyne	Russian Academy of Sciences, Zoological Institute	V. Lukhtanov leg.	Kyrgyzstan		Kirgizsky Khrebet		Tyuz-Ashu Pass, south slope			2700
LOWAM041-08	VL-J041	J041	658[0n]	2	ori1	07-Jul-1995	mnemosyne	Russian Academy of Sciences, Zoological Institute	V. Lukhtanov leg.	Kyrgyzstan				Ala-Bel Pass, south slope			2400
LOWAM042-08	VL-J042	J042	658[0n]	2	mne3	15-Jun-1991	mnemosyne	Russian Academy of Sciences, Zoological Institute	V. Lukhtanov leg.	Russia	Belgorodskaya Oblast	Belgorodskaya oblast		Borisovka			150
LOWAM043-08	VL-J043	J043	658[0n]	2	mne3	15-Jun-1991	mnemosyne	Russian Academy of Sciences, Zoological Institute	V. Lukhtanov leg.	Russia	Belgorodskaya Oblast	Belgorodskaya oblast		Borisovka			150
LOWAM044-08	VL-J044	J044	658[0n]	2	mne1	15-Jun-1991	mnemosyne	Russian Academy of Sciences, Zoological Institute	V. Lukhtanov leg.	Russia	Belgorodskaya Oblast	Belgorodskaya oblast		Borisovka			150
LOWAM045-08	VL-J045	J045	658[0n]	2	gig7	05-Jun-1994	mnemosyne	Russian Academy of Sciences, Zoological Institute	V. Lukhtanov leg.	Tajikistan		Turkestanski Mts		Shkhristan Pass (north slope)			2000
LOWAM046-08	VL-J046	J046	658[0n]	2	gig7	05-Jun-1994	mnemosyne	Russian Academy of Sciences, Zoological Institute	V. Lukhtanov leg.	Tajikistan		Turkestanski Mts		Shkhristan Pass (north slope)			2000
LOWAM047-08	VL-J047	J047	658[0n]	2	gig7	05-Jun-1994	mnemosyne	Russian Academy of Sciences, Zoological Institute	V. Lukhtanov leg.	Tajikistan		Turkestanski Mts		Shkhristan Pass (north slope)			2000
LOWAM048-08	VL-J048	J048	658[0n]	2	gig2	07-Jun-1994	mnemosyne	Russian Academy of Sciences, Zoological Institute	V. Lukhtanov leg.	Tajikistan		Turkestanski Mts		Shkhristan Pass (north slope)			2500
LOWAM049-08	VL-J049	J049	658[0n]	2	gig2	07-Jun-1994	mnemosyne	Russian Academy of Sciences, Zoological Institute	V. Lukhtanov leg.	Tajikistan		Turkestanski Mts		Shkhristan Pass (north slope)			2500
LOWAM050-08	VL-J050	J050	658[0n]	2	gig2	07-Jun-1994	mnemosyne	Russian Academy of Sciences, Zoological Institute	V. Lukhtanov leg.	Tajikistan		Turkestanski Mts		Shkhristan Pass (north slope)			2500
LOWAM051-08	VL-J051	J051	609[0n]	6	gig8	09-Jun-1994	mnemosyne	Russian Academy of Sciences, Zoological Institute	V. Lukhtanov leg.	Tajikistan				Revad			1400
LOWAM052-08	VL-J052	J052	658[0n]	2	gig2	04-Jun-1986	mnemosyne	Russian Academy of Sciences, Zoological Institute	V. Lukhtanov leg.	Tajikistan							2000
LOWAM055-08	VL-J055	J055	609[0n]	6	gig8	24-Jul-1994	mnemosyne	Russian Academy of Sciences, Zoological Institute	V. Lukhtanov leg.	Tajikistan		Gissar Mts		Ansob Pass			3450
LOWAM056-08	VL-J056	J056	658[0n]	2	gig2	24-Jul-1994	mnemosyne	Russian Academy of Sciences, Zoological Institute	V. Lukhtanov leg.	Tajikistan		Gissar Mts		Ansob Pass			3450
LOWAM057-08	VL-J057	J057	658[0n]	2	gig2	24-Jul-1994	mnemosyne	Russian Academy of Sciences, Zoological Institute	V. Lukhtanov leg.	Tajikistan		Gissar Mts		Ansob Pass			3450
LOWAM058-08	VL-J058	J058	658[0n]	2	ori1	23-Jun-2000	mnemosyne	Russian Academy of Sciences, Zoological Institute	V. Lukhtanov leg.	Kazakhstan		Karzhantau Mts					2500
LOWAM059-08	VL-J059	J059	658[0n]	2	ori1	23-Jun-2000	mnemosyne	Russian Academy of Sciences, Zoological Institute	V. Lukhtanov leg.	Kazakhstan		Karzhantau Mts					2500
LOWAM060-08	VL-J060	J060	658[0n]	2	ori1	23-Jun-2000	mnemosyne	Russian Academy of Sciences, Zoological Institute	V. Lukhtanov leg.	Kazakhstan		Karzhantau Mts					2500
LOWAM061-08	VL-J061	J061	658[0n]	2	ori1	25-Jun-2000	mnemosyne	Russian Academy of Sciences, Zoological Institute	V. Lukhtanov leg.	Kazakhstan				Saryaigyr			2400
LOWAM062-08	VL-J062	J062	658[0n]	2	gig2	11-Jul-1994	mnemosyne	Russian Academy of Sciences, Zoological Institute	V. Lukhtanov leg.	Tajikistan		Gissar Mts (West)		Magien			3100
LOWAM063-08	VL-J063	J063	609[0n]	6	gig8	11-Jul-1994	mnemosyne	Russian Academy of Sciences, Zoological Institute	V. Lukhtanov leg.	Tajikistan		Gissar Mts (West)		Magien			3100
LOWAM064-08	VL-J064	J064	658[0n]	2	ori9	13-Jun-2000	mnemosyne	Russian Academy of Sciences, Zoological Institute	V. Lukhtanov leg.	Kazakhstan		Kirgizsky Khrebet		Merke			1500
LOWAM065-08	VL-J065	J065	658[0n]	2	ori9	15-Jun-2000	mnemosyne	Russian Academy of Sciences, Zoological Institute	V. Lukhtanov leg.	Kazakhstan		Kirgizsky Khrebet		Kaindy			2500
LOWAM066-08	VL-J066	J066	658[0n]	2	ori9	15-Jun-2000	mnemosyne	Russian Academy of Sciences, Zoological Institute	V. Lukhtanov leg.	Kazakhstan		Kirgizsky Khrebet		Kaindy			2500
LOWAM067-08	VL-J067	J067	658[0n]	2	ori6	15-Jun-2000	mnemosyne	Russian Academy of Sciences, Zoological Institute	V. Lukhtanov leg.	Kazakhstan		Kirgizsky Khrebet		Kaindy			2500
LOWAM069-08	VL-J069	J069	649[3n]	4	mne7	01-Aug-1983	mnemosyne	Russian Academy of Sciences, Zoological Institute	V. Lukhtanov leg.	Russia		W Caucasus		Teberda, Klukhor Pass			2400
LOWAM070-08	VL-J070	J070	648[1n]	4	mne5	15-Jul-1978	mnemosyne	Russian Academy of Sciences, Zoological Institute	V. Lukhtanov leg.	Russia		W Caucasus		Teberdinsky Zapovednik			2400
LOWAM072-08	VL-J072	J072	658[0n]	2	ori1	22-May-1997	mnemosyne	Russian Academy of Sciences, Zoological Institute	V. Lukhtanov leg.	Kyrgyzstan		Chatkalsky Khrebet		Sary-Chelek			1650
LOWAM073-08	VL-J073	J073	658[0n]	2	ori7	25-May-1997	mnemosyne	Russian Academy of Sciences, Zoological Institute	V. Lukhtanov leg.	Kyrgyzstan		Takhtalyk					1450
LOWAM074-08	VL-J074	J074	658[0n]	2	ori5	04-Jul-1993	mnemosyne	Russian Academy of Sciences, Zoological Institute	V. Lukhtanov leg.	Kyrgyzstan		Naryn-Too Mts					3150
LOWAM075-08	VL-J075	J075	658[0n]	2	ori1	04-Jul-1993	mnemosyne	Russian Academy of Sciences, Zoological Institute	V. Lukhtanov leg.	Kyrgyzstan		Naryn-Too Mts					3150
LOWAM076-08	VL-J076	J076	658[0n]	2	ori5	05-Jul-1993	mnemosyne	Russian Academy of Sciences, Zoological Institute	V. Lukhtanov leg.	Kyrgyzstan				Ak-Muz			3100
LOWAM077-08	VL-J077	J077	658[0n]	2	ori2	30-Jun-1995	mnemosyne	Russian Academy of Sciences, Zoological Institute	V. Lukhtanov leg.	Kyrgyzstan		Moldatoo Mts		Uzun-Bulak Pass			3000
LOWAM078-08	VL-J078	J078	658[0n]	2	ori5	30-Jun-1995	mnemosyne	Russian Academy of Sciences, Zoological Institute	V. Lukhtanov leg.	Kyrgyzstan		Moldatoo Mts		Uzun-Bulak Pass			3000
LOWAM079-08	VL-J079	J079	609[0n]	6	ori9	30-Jun-1995	mnemosyne	Russian Academy of Sciences, Zoological Institute	V. Lukhtanov leg.	Kyrgyzstan		Moldatoo Mts		Uzun-Bulak Pass			3000
LOWAM080-08	VL-J080	J080	658[0n]	2	ori5	01-Jul-1995	mnemosyne	Russian Academy of Sciences, Zoological Institute	V. Lukhtanov leg.	Kyrgyzstan				Songkel Lake			3200
LOWAM081-08	VL-J081	J081	658[0n]	2	ori5	01-Jul-1995	mnemosyne	Russian Academy of Sciences, Zoological Institute	V. Lukhtanov leg.	Kyrgyzstan				Songkel Lake			3200
LOWAM082-08	VL-J082	J082	658[0n]	2	ori5	01-Jul-1995	mnemosyne	Russian Academy of Sciences, Zoological Institute	V. Lukhtanov leg.	Kyrgyzstan				Songkel Lake			3200
LOWAM086-08	VL-J086	J086	658[0n]	4	nub1	01-Apr-1979	nubilosus	Russian Academy of Sciences, Zoological Institute	Ju.Ja.Sokolova	Turkmenistan		Kopetdagh		Ai-Dere			800
LOWAM087-08	VL-J087	J087	658[2n]	2	gig8	16-Jun-1994	mnemosyne	Russian Academy of Sciences, Zoological Institute	V. Lukhtanov leg.	Uzbekistan		Gissar Mts (West)		Sarchashma			2600
LOWAM088-08	VL-J088	J088	658[0n]	2	gig2	16-Jun-1994	mnemosyne	Russian Academy of Sciences, Zoological Institute	V. Lukhtanov leg.	Uzbekistan		Gissar Mts (West)		Sarchashma			2600
LOWAM089-08	VL-J089	J089	658[0n]	2	gig2	16-Jun-1994	mnemosyne	Russian Academy of Sciences, Zoological Institute	V. Lukhtanov leg.	Uzbekistan		Gissar Mts (West)		Sarchashma			2600
LOWAM090-08	VL-J090	J090	658[0n]	2	ori1	26-May-1997	mnemosyne	Russian Academy of Sciences, Zoological Institute	V. Lukhtanov leg.	Kyrgyzstan				Chychkan			1800
LOWAM091-08	VL-J091	J091	658[0n]	2	ori1	26-May-1997	mnemosyne	Russian Academy of Sciences, Zoological Institute	V. Lukhtanov leg.	Kyrgyzstan				Chychkan			1800
LOWAM092-08	VL-J092	J092	658[0n]	2	ori1	26-May-1997	mnemosyne	Russian Academy of Sciences, Zoological Institute	V. Lukhtanov leg.	Kyrgyzstan				Chychkan			1800
LOWAM093-08	VL-J093	J093	658[0n]	2	ori5	27-May-1997	mnemosyne	Russian Academy of Sciences, Zoological Institute	V. Lukhtanov leg.	Kyrgyzstan				between Alabel and Tjuz-Ashu passes			1800
LOWAM094-08	VL-J094	J094	658[0n]	2	ori5	27-May-1997	mnemosyne	Russian Academy of Sciences, Zoological Institute	V. Lukhtanov leg.	Kyrgyzstan		Kirgizsky Khrebet		Sosnovka, Usun-Bulak valley			1500
LOWAM095-08	VL-J095	J095	658[0n]	2	ori5	27-May-1997	mnemosyne	Russian Academy of Sciences, Zoological Institute	V. Lukhtanov leg.	Kyrgyzstan		Kirgizsky Khrebet		Sosnovka, Usun-Bulak valley			1500
LOWAM096-08	VL-J096	J096	658[0n]	2	gig9	01-Jul-1994	mnemosyne	Russian Academy of Sciences, Zoological Institute	V. Lukhtanov leg.	Tajikistan		Gissar Mts (SW)		Khodiza			2600
LOWAM097-08	VL-J097	J097	658[0n]	2	gig9	01-Jul-1994	mnemosyne	Russian Academy of Sciences, Zoological Institute	V. Lukhtanov leg.	Tajikistan		Gissar Mts (SW)		Khodiza			2600
LOWAM098-08	VL-J098	J098	658[0n]	2	gig9	01-Jul-1994	mnemosyne	Russian Academy of Sciences, Zoological Institute	V. Lukhtanov leg.	Tajikistan		Gissar Mts (SW)		Khodiza			2600
LOWAM099-08	VL-J099	J099	658[0n]	2	ori8	19-May-1997	mnemosyne	Russian Academy of Sciences, Zoological Institute	V. Lukhtanov leg.	Uzbekistan		Kuraminsky Khrebet		Kamchik Pass (south)			2600
LOWAM100-08	VL-J100	J100	658[0n]	5	ori5	18-Aug-1900	mnemosyne	Russian Academy of Sciences, Zoological Institute	V. Lukhtanov leg.	Kyrgyzstan		Ferganski Khrebet		Konduk			3300
LOWAM101-08	VL-J101	J101	658[0n]	2	ori5	18-Aug-1900	mnemosyne	Russian Academy of Sciences, Zoological Institute	V. Lukhtanov leg.	Kyrgyzstan		Ferganski Khrebet		Konduk			3300
LOWAM102-08	VL-J102	J102	618[0n]	5	ori5	18-Aug-1900	mnemosyne	Russian Academy of Sciences, Zoological Institute	V. Lukhtanov leg.	Kyrgyzstan		Ferganski Khrebet		Konduk			3300
LOWAM103-08	VL-J103	J103	658[0n]	2	ori1	18-Jun-1996	mnemosyne	Russian Academy of Sciences, Zoological Institute	V. Lukhtanov leg.	Kazakhstan		Turaigyr		Kamchik Pass (south)			1650
LOWAM104-08	VL-J104	J104	658[0n]	2	ori1	18-Jun-1996	mnemosyne	Russian Academy of Sciences, Zoological Institute	V. Lukhtanov leg.	Kazakhstan		Turaigyr		Kamchik Pass (south)			1650
LOWAM105-08	VL-J105	J105	658[0n]	2	ori1	18-Jun-1996	mnemosyne	Russian Academy of Sciences, Zoological Institute	V. Lukhtanov leg.	Kazakhstan		Turaigyr		Kamchik Pass (south)			1650
LOWAM106-08	VL-J106	J106	658[0n]	2	ori8	31-May-1994	mnemosyne	Russian Academy of Sciences, Zoological Institute	V. Lukhtanov leg.	Uzbekistan		S of Tashkent		Krasnogorka			1200
LOWAM107-08	VL-J107	J107	609[4n]	3	gig2	12-May-1980	mnemosyne	Russian Academy of Sciences, Zoological Institute	V. Lukhtanov leg.	Uzbekistan		Seravshaski Khrebet		Agalyk			1500
LOWAM111-08	VL-J111	J111	658[0n]	2	ori5	08-Aug-1995	mnemosyne	Russian Academy of Sciences, Zoological Institute	V. Shurov	Kyrgyzstan		Naryn-Too Mts		NW part
LOWAM112-08	VL-J112	J112	658[0n]	2	ori5	08-Aug-1995	mnemosyne	Russian Academy of Sciences, Zoological Institute	V. Shurov	Kyrgyzstan		Naryn-Too Mts		NW part
LOWAM115-08	VL-J115	J115	658[0n]	2	ado1	07-Jul-1984	mnemosyne	Russian Academy of Sciences, Zoological Institute	V. Lukhtanov leg.	Azerbaijan		Nakhichevan		Njus-Njus			2300
LOWAM116-08	VL-J116	J116	658[0n]	2	ado2	04-Aug-2004	mnemosyne	Russian Academy of Sciences, Zoological Institute	V. Lukhtanov leg.	Iran		Elburs Mts		Dizin			3200
LOWAM117-08	VL-J117	J117	658[0n]	2	ado2	04-Aug-2004	mnemosyne	Russian Academy of Sciences, Zoological Institute	V. Lukhtanov leg.	Iran		Elburs Mts		Dizin			3200
LOWAM118-08	VL-J118	J118	658[0n]	2	mne1	07-Jun-1991	mnemosyne	Russian Academy of Sciences, Zoological Institute	V. Lukhtanov leg.	Russia	Belgorodskaya Oblast	Belgorod Region		Borisovka			150
LOWAM119-08	VL-J119	J119	658[0n]	2	mne1	07-Jun-1991	mnemosyne	Russian Academy of Sciences, Zoological Institute	V. Lukhtanov leg.	Russia	Belgorodskaya Oblast	Belgorod Region		Borisovka			150
LOWAM120-08	VL-J120	J120	658[0n]	2	mne3	07-Jun-1991	mnemosyne	Russian Academy of Sciences, Zoological Institute	V. Lukhtanov leg.	Russia	Belgorodskaya Oblast	Belgorod Region		Borisovka			150
LOWAM121-08	VL-J121	J121	658[0n]	2	mne3	27-May-1991	mnemosyne	Russian Academy of Sciences, Zoological Institute	A. Lukhtanov leg.	Russia	Saratovskaya Oblast			10 km NW Saratov
LOWAM122-08	VL-J122	J122	658[0n]	2	mne3	27-May-1991	mnemosyne	Russian Academy of Sciences, Zoological Institute	A. Lukhtanov leg.	Russia	Saratovskaya Oblast			10 km NW Saratov
LOWAM123-08	VL-J123	J123	658[0n]	2	mne3	27-May-1991	mnemosyne	Russian Academy of Sciences, Zoological Institute	A. Lukhtanov leg.	Russia	Saratovskaya Oblast			10 km NW Saratov
LOWAM124-08	VL-J124	J124	658[0n]	2	ori5	30-Jul-1992	mnemosyne	Russian Academy of Sciences, Zoological Institute	V. Lukhtanov leg.	Kyrgyzstan				Ak-Muz			3300
LOWAM125-08	VL-J125	J125	658[0n]	2	ori5	30-Jul-1992	mnemosyne	Russian Academy of Sciences, Zoological Institute	V. Lukhtanov leg.	Kyrgyzstan				Ak-Muz			3300
LOWAM126-08	VL-J126	J126	658[0n]	2	gig1	16-Jul-1993	mnemosyne	Russian Academy of Sciences, Zoological Institute	V. Lukhtanov leg.	Kyrgyzstan		Alai Mts		Chak			3000
LOWAM127-08	VL-J127	J127	658[0n]	2	gig1	16-Jul-1993	mnemosyne	Russian Academy of Sciences, Zoological Institute	V. Lukhtanov leg.	Kyrgyzstan		Alai Mts		Chak			3000
LOWAM128-08	VL-J128	J128	658[0n]	2	gig1	16-Jul-1993	mnemosyne	Russian Academy of Sciences, Zoological Institute	V. Lukhtanov leg.	Kyrgyzstan		Alai Mts		Chak			3000
LOWAM129-08	VL-J129	J129	609[0n]	4	gig8	05-Jun-1994	mnemosyne	Russian Academy of Sciences, Zoological Institute	V. Lukhtanov leg.	Tajikistan		Turkestanski Mts		Shkhristan Pass (north slope)			2000
LOWAM130-08	VL-J130	J130	658[0n]	2	gig2	07-Jun-1994	mnemosyne	Russian Academy of Sciences, Zoological Institute	V. Lukhtanov leg.	Tajikistan		Turkestanski Mts		Shkhristan Pass (southern slope)			2500
LOWAM131-08	VL-J131	J131	658[0n]	2	gig2	07-Jun-1994	mnemosyne	Russian Academy of Sciences, Zoological Institute	V. Lukhtanov leg.	Tajikistan		Turkestanski Mts		Shkhristan Pass (southern slope)			2500
LOWAM132-08	VL-J132	J132	658[0n]	2	gig2	07-Jun-1994	mnemosyne	Russian Academy of Sciences, Zoological Institute	V. Lukhtanov leg.	Tajikistan		Turkestanski Mts		Shkhristan Pass (southern slope)			2500
LOWAM133-08	VL-J133	J133	658[0n]	2	gig2	16-Jun-1994	mnemosyne	Russian Academy of Sciences, Zoological Institute	V. Lukhtanov leg.	Uzbekistan		Gissar Mts West		Sarchashma			2600
LOWAM134-08	VL-J134	J134	658[0n]	2	gig2	16-Jun-1994	mnemosyne	Russian Academy of Sciences, Zoological Institute	V. Lukhtanov leg.	Uzbekistan		Gissar Mts West		Sarchashma			2600
LOWAM135-08	VL-J135	J135	658[0n]	2	gig9	16-Jun-1994	mnemosyne	Russian Academy of Sciences, Zoological Institute	V. Lukhtanov leg.	Uzbekistan		Gissar Mts West		Sarchashma			2600
LOWAM136-08	VL-J136	J136	658[0n]	2	gig3	20-Jun-1994	mnemosyne	Russian Academy of Sciences, Zoological Institute	V. Lukhtanov leg.	Uzbekistan		Gissar Mts		Tamshush			3000
LOWAM137-08	VL-J137	J137	658[0n]	2	gig2	20-Jun-1994	mnemosyne	Russian Academy of Sciences, Zoological Institute	V. Lukhtanov leg.	Uzbekistan		Gissar Mts		Tamshush			3000
LOWAM138-08	VL-J138	J138	658[0n]	2	gig9	20-Jun-1994	mnemosyne	Russian Academy of Sciences, Zoological Institute	V. Lukhtanov leg.	Uzbekistan		Gissar Mts		Tamshush			3000
LOWAM139-08	VL-J139	J139	658[0n]	2	gig9	01-Jul-1994	mnemosyne	Russian Academy of Sciences, Zoological Institute	V. Lukhtanov leg.	Tajikistan		Gissar Mts SW		Khondiza			2600
LOWAM140-08	VL-J140	J140	658[0n]	2	gig2	24-Jul-1994	mnemosyne	Russian Academy of Sciences, Zoological Institute	V. Lukhtanov leg.	Tajikistan		Gissar Mts		Ansob Pass			3450
LOWAM141-08	VL-J141	J141	658[0n]	2	gig11	24-Jul-1994	mnemosyne	Russian Academy of Sciences, Zoological Institute	V. Lukhtanov leg.	Tajikistan		Gissar Mts		Ansob Pass			3450
LOWAM142-08	VL-J142	J142	658[0n]	2	ori2	26-Jun-1995	mnemosyne	Russian Academy of Sciences, Zoological Institute	V. Lukhtanov leg.	Kyrgyzstan		Modatoo Mts					2700
LOWAM143-08	VL-J143	J143	658[0n]	2	ori1	26-Jun-1995	mnemosyne	Russian Academy of Sciences, Zoological Institute	V. Lukhtanov leg.	Kyrgyzstan		Modatoo Mts					2700
LOWAM144-08	VL-J144	J144	658[0n]	2	ori1	26-Jun-1995	mnemosyne	Russian Academy of Sciences, Zoological Institute	V. Lukhtanov leg.	Kyrgyzstan		Modatoo Mts					2700
LOWAM145-08	VL-J145	J145	658[0n]	2	ori2	30-Jun-1995	mnemosyne	Russian Academy of Sciences, Zoological Institute	V. Lukhtanov leg.	Kyrgyzstan		Moldatoo Mts		Uzun-Bulak Pass			3000
LOWAM146-08	VL-J146	J146	658[0n]	2	ori2	30-Jun-1995	mnemosyne	Russian Academy of Sciences, Zoological Institute	V. Lukhtanov leg.	Kyrgyzstan		Moldatoo Mts		Uzun-Bulak Pass			3000
LOWAM147-08	VL-J147	J147	658[0n]	2	ori2	30-Jun-1995	mnemosyne	Russian Academy of Sciences, Zoological Institute	V. Lukhtanov leg.	Kyrgyzstan		Moldatoo Mts		Uzun-Bulak Pass			3000
LOWAM148-08	VL-J148	J148	658[0n]	2	ori5	01-Jul-1995	mnemosyne	Russian Academy of Sciences, Zoological Institute	V. Lukhtanov leg.	Kyrgyzstan				Songkel Lake			3200
LOWAM149-08	VL-J149	J149	658[0n]	2	ori9	01-Jul-1995	mnemosyne	Russian Academy of Sciences, Zoological Institute	V. Lukhtanov leg.	Kyrgyzstan				Songkel Lake			3200
LOWAM150-08	VL-J150	J150	658[0n]	2	ori5	01-Jul-1995	mnemosyne	Russian Academy of Sciences, Zoological Institute	V. Lukhtanov leg.	Kyrgyzstan				Songkel Lake			3200
LOWAM151-08	VL-J151	J151	658[0n]	2	ori4	06-Jul-1995	mnemosyne	Russian Academy of Sciences, Zoological Institute	V. Lukhtanov leg.	Kyrgyzstan		Kirgizsky Khrebet		Tyuz-Ashu Pass, south slope			2700
LOWAM152-08	VL-J152	J152	658[0n]	2	ori1	06-Jul-1995	mnemosyne	Russian Academy of Sciences, Zoological Institute	V. Lukhtanov leg.	Kyrgyzstan		Kirgizsky Khrebet		Tyuz-Ashu Pass, south slope			2700
LOWAM153-08	VL-J153	J153	658[0n]	2	gig1	16-Jul-1995	mnemosyne	Russian Academy of Sciences, Zoological Institute	V. Lukhtanov leg.	Kyrgyzstan		Alai Mts		Karamyk			3050
LOWAM154-08	VL-J154	J154	658[0n]	2	gig1	16-Jul-1995	mnemosyne	Russian Academy of Sciences, Zoological Institute	V. Lukhtanov leg.	Kyrgyzstan		Alai Mts		Karamyk			3050
LOWAM155-08	VL-J155	J155	658[0n]	2	gig1	16-Jul-1995	mnemosyne	Russian Academy of Sciences, Zoological Institute	V. Lukhtanov leg.	Kyrgyzstan		Alai Mts		Karamyk			3050
LOWAM156-08	VL-J156	J156	658[0n]	2	ori1	26-May-1997	mnemosyne	Russian Academy of Sciences, Zoological Institute	V. Lukhtanov leg.	Kyrgyzstan				Chychkan			1800
LOWAM157-08	VL-J157	J157	658[0n]	2	ori1	26-May-1997	mnemosyne	Russian Academy of Sciences, Zoological Institute	V. Lukhtanov leg.	Kyrgyzstan				Chychkan			2200
LOWAM158-08	VL-J158	J158	658[0n]	2	ori1	26-May-1997	mnemosyne	Russian Academy of Sciences, Zoological Institute	V. Lukhtanov leg.	Kyrgyzstan				Chychkan			2200
LOWAM159-08	VL-J159	J159	658[0n]	2	ori5	15-Jun-2000	mnemosyne	Russian Academy of Sciences, Zoological Institute	V. Lukhtanov leg.	Kazakhstan		Kirgizsky Khrebet		Kaindy			2500
LOWAM160-08	VL-J160	J160	658[0n]	2	ori5	15-Jun-2000	mnemosyne	Russian Academy of Sciences, Zoological Institute	V. Lukhtanov leg.	Kazakhstan		Kirgizsky Khrebet		Kaindy			2500
LOWAM161-08	VL-J161	J161	658[0n]	2	ori5	15-Jun-2000	mnemosyne	Russian Academy of Sciences, Zoological Institute	V. Lukhtanov leg.	Kazakhstan		Kirgizsky Khrebet		Kaindy			2500
LOWAM162-08	VL-J162	J162	608[0n]	4	ori2	23-Jun-2000	mnemosyne	Russian Academy of Sciences, Zoological Institute	V. Lukhtanov leg.	Kazakhstan		Karzhantau Mts					2500
LOWAM163-08	VL-J163	J163	658[0n]	2	ori1	23-Jun-2000	mnemosyne	Russian Academy of Sciences, Zoological Institute	V. Lukhtanov leg.	Kazakhstan		Karzhantau Mts					2500
LOWAM164-08	VL-J164	J164	658[0n]	2	ori1	23-Jun-2000	mnemosyne	Russian Academy of Sciences, Zoological Institute	V. Lukhtanov leg.	Kazakhstan		Karzhantau Mts					2500
LOWAM165-08	VL-J165	J165	658[0n]	2	gig2	15-May-1994	mnemosyne	Russian Academy of Sciences, Zoological Institute	V. Lukhtanov leg.	Tajikistan				Taribak			1200
LOWAM166-08	VL-J166	J166	658[0n]	2	gig2	15-May-1994	mnemosyne	Russian Academy of Sciences, Zoological Institute	V. Lukhtanov leg.	Tajikistan				Taribak			1200
LOWAM167-08	VL-J167	J167	605[0n]	4	gig10	15-May-1994	mnemosyne	Russian Academy of Sciences, Zoological Institute	V. Lukhtanov leg.	Tajikistan				Taribak			1200
LOWAM168-08	VL-J168	J168	658[0n]	2	gig2	17-May-1994	mnemosyne	Russian Academy of Sciences, Zoological Institute	V. Lukhtanov leg.	Uzbekistan		Nuratau Mts		Zarmitan			1300
LOWAM169-08	VL-J169	J169	658[0n]	2	gig2	17-May-1994	mnemosyne	Russian Academy of Sciences, Zoological Institute	V. Lukhtanov leg.	Uzbekistan		Nuratau Mts		Zarmitan			1300
LOWAM170-08	VL-J170	J170	604[0n]	4	gig10	17-May-1994	mnemosyne	Russian Academy of Sciences, Zoological Institute	V. Lukhtanov leg.	Uzbekistan		Nuratau Mts		Zarmitan			1300
LOWAM171-08	VL-J171	J171	658[0n]	2	gig2	13-May-1994	mnemosyne	Russian Academy of Sciences, Zoological Institute	V. Lukhtanov leg.	Tajikistan		Turkestanski Mts		Amondara			1600
LOWAM172-08	VL-J172	J172	658[0n]	2	gig2	13-May-1994	mnemosyne	Russian Academy of Sciences, Zoological Institute	V. Lukhtanov leg.	Tajikistan		Turkestanski Mts		Amondara			1600
LOWAM173-08	VL-J173	J173	614[0n]	4	gig10	13-May-1994	mnemosyne	Russian Academy of Sciences, Zoological Institute	V. Lukhtanov leg.	Tajikistan		Turkestanski Mts		Amondara			1600
LOWAM196-09	VL-J196	VL09-J196	658[0n]	6	nub1	19-May-1996	nubilosus	Research Collection of B. Khramov	from S. Obukhov	Turkmenistan		West Kopet-Dagh		close to Nochur, Ilai-Kala
LOWAM197-09	VL-J197	VL09-J197	658[0n]	6	nub1	19-May-1996	nubilosus	Research Collection of B. Khramov	from S. Obukhov	Turkmenistan		West Kopet-Dagh		close to Nochur, Ilai-Kala
LOWAM198-09	VL-J198	VL09-J198	466[0n]	6	ado3	29-Jun-1997	mnemosyne	Russian Academy of Sciences, Zoological Institute	V. Shurov leg.	Turkey		Taurus (gory Tavr)		Aladaglar Mts			2300
LOWAM199-09	VL-J199	VL09-J199	466[0n]	6	ado3	29-Jun-1997	mnemosyne	Russian Academy of Sciences, Zoological Institute	V. Shurov leg.	Turkey		Taurus (gory Tavr)		Aladaglar Mts			2300
LOWAM200-09	VL-J200	VL09-J200	658[0n]	2	mne5	05-Jul-1986	mnemosyne	Russian Academy of Sciences, Zoological Institute	G.A.Grigoriev leg.	Georgia			western part	Mestia
LOWAM201-09	VL-J201	VL09-J201	658[0n]	6	mne5	04-Jul-1986	mnemosyne	Russian Academy of Sciences, Zoological Institute	G.A.Grigoriev leg.	Georgia			western part	Mestia
LOWAM202-09	VL-J202	VL09-J202	658[0n]	2	mne4	05-Jun-1986	mnemosyne	Russian Academy of Sciences, Zoological Institute	B.A.Khramov leg.	Russia	Leningradskaya Oblast	Leningradskaya oblast` (St. Petersburg region)		Near Luga, Nizovskaya			50
LOWAM203-09	VL-J203	VL09-J203	658[0n]	6	mne4	25-May-1983	mnemosyne	Russian Academy of Sciences, Zoological Institute	B.A.Khramov leg.	Russia	Leningradskaya Oblast	Leningradskaya oblast` (St. Petersburg region)		Near Luga, Siverskauya			50
LOWAM205-09	VL-J205	VL09-J205	658[0n]	2	ori1	23-Jun-2004	mnemosyne	Russian Academy of Sciences, Zoological Institute	from I.Osipov	Kyrgyzstan		Kungey-Alatoo Mts		Ananjevo			1800
LOWAM206-09	VL-J206	VL09-J206	658[0n]	2	mne4	25-Jun-1999	mnemosyne	Russian Academy of Sciences, Zoological Institute	from S. Obukhov	Russia	Vologodskaya Oblast	Vologodskaya oblast		Babaevskiy rayon, Nesterovo
LOWAM207-09	VL-J207	VL09-J207	407[0n]	6	gig10	02-Jul-1983	mnemosyne	Russian Academy of Sciences, Zoological Institute	V.N.Prasolov	Tajikistan				Obihingou
LOWAM208-09	VL-J208	VL09-J208	501[0n]	6	gig8	07-Jul-1979	mnemosyne	Russian Academy of Sciences, Zoological Institute	V.N.Prasolov	Tajikistan		Peter The Great Mts		Muksu valley, Muk
LOWAM209-09	VL-J209	VL09-J209	658[0n]	2	gig2	30-Jul-2005	mnemosyne	Russian Academy of Sciences, Zoological Institute	B.A.Khramov leg.	Tajikistan		Gissar Mts		Pairon River, Angisht pass			3600
LOWAM210-09	VL-J210	VL09-J210	658[0n]	2	gig2	30-Jul-2005	mnemosyne	Russian Academy of Sciences, Zoological Institute	B.A.Khramov leg.	Tajikistan		Gissar Mts		Pairon River, Angisht pass			3600
LOWAM212-09	VL-J212	VL09-J212	658[0n]	2	gig2	03-Jun-1991	mnemosyne	Russian Academy of Sciences, Zoological Institute	B.A.Khramov leg.	Tajikistan		Gissar Mts		Varzob valley, Kondara			1900
LOWAM213-09	VL-J213	VL09-J213	658[0n]	2	gig5	27-Jun-1979	mnemosyne	Russian Academy of Sciences, Zoological Institute	V.N.Prasolov	Tajikistan		Alai Mts		Tandykul valley, Yarmazar
BPALB154-16	CCDB-25458 E11	CCDB-25458 E11	658[0n]	2	ado4		mnemosyne	Russian Academy of Sciences, Zoological Institute		Israel			Hermon		33.2878	35.7378
BPALB230-17	CCDB-23377 D04	CCDB-23377 D04	658[0n]	4	gig2		mnemosyne	Russian Academy of Sciences, Zoological Institute		Tajikistan
BPALB245-17	CCDB-23377 E07	CCDB-23377 E07	513[0n]	4	gig2		mnemosyne	Russian Academy of Sciences, Zoological Institute		Tajikistan
BPALB258-17	CCDB-23377 F08	CCDB-23377 F08	658[0n]	4	gig1		mnemosyne	Russian Academy of Sciences, Zoological Institute		Tajikistan
BPALB369-17	CCDB-23845 G12	CCDB-23845 G12	658[0n]	2	gig1		mnemosyne	Russian Academy of Sciences, Zoological Institute		Tajikistan
BPALB389-17	CCDB-23846 A09	CCDB-23846 A09	658[0n]	2	gig1		mnemosyne	Russian Academy of Sciences, Zoological Institute		Tajikistan
BPAL2225-13	CCDB-17949 D04		658[0n]	2	ado4		mnemosyne	Russian Academy of Sciences, Zoological Institute		Israel		N. Israel	Mt. Hermon		33.3127	35.795	2056
BPAL2226-13	CCDB-17949 D05		658[0n]	2	ado4		mnemosyne	Russian Academy of Sciences, Zoological Institute		Israel		N. Israel	Mt. Hermon		33.3127	35.795	2056
BPAL2794-15	CCDB-17969 D03		658[0n]	2	mne8	15-Jun-2009	mnemosyne	Russian Academy of Sciences, Zoological Institute	V.Lukhtanov	Russia		Pskov	20 km S Novorzhev		56.85	29.42	275
BPAL2795-15	CCDB-17969 D04		658[0n]	2	mne8	15-Jun-2009	mnemosyne	Russian Academy of Sciences, Zoological Institute	V.Lukhtanov	Russia		Pskov	20 km S Novorzhev		56.85	29.42	275
BPAL3195-16	CCDB-25453 E12	CCDB-25453 E12	658[0n]	2	ado4		mnemosyne	Russian Academy of Sciences, Zoological Institute		Israel		Hermon	Verkhniy
BPAL3196-16	CCDB-25453 F01	CCDB-25453 F01	658[0n]	2	ado4		mnemosyne	Russian Academy of Sciences, Zoological Institute		Israel		Hermon	Verkhniy
BPAL3358-16	CCDB-25452 C09	CCDB-25452 C09	658[0n]	2	ado4		mnemosyne	Russian Academy of Sciences, Zoological Institute		Israel		Hermon Mt					2056
BPAL2276-13	CCDB-17949 H07		647[0n]	2	nor1	01-Jul-2013	nordmanni	Research Collection of Valentin Tikhonov	V. Tikhonov	Georgia		Adzharia	pass Akhalcikhe-Batumi		41.6128	42.5192	2320
BPAL2277-13	CCDB-17949 H08		626[0n]	2	nor1	01-Jul-2013	nordmanni	Research Collection of Valentin Tikhonov	V. Tikhonov	Georgia		Adzharia	pass Akhalcikhe-Batumi		41.6128	42.5192	2320
BPAL2278-13	CCDB-17949 H09		569[0n]	2	nor1	01-Jul-2013	nordmanni	Research Collection of Valentin Tikhonov	V. Tikhonov	Georgia		Adzharia	pass Akhalcikhe-Batumi		41.6128	42.5192	2320
LOWAM269-11	CCDB-03027_E07		645[0n]	2	ari2	25-Jun-2004	ariadne	Russian Academy of Sciences, Zoological Institute	V.Lukhtanov	Kazakhstan	East Kazakhstan	West Altai	Near Ridder	Prokhodnoi Belok			1350
LOWAM273-11	CCDB-03027_E11		658[0n]	2	ari2	27-Jun-2004	ariadne	Russian Academy of Sciences, Zoological Institute	V.Lukhtanov	Kazakhstan	East Kazakhstan	West Altai	Near Ridder	Prokhodnoi Belok			1200
LOWAM287-11	CCDB-03027_G01		658[0n]	2	ari1	25-May-2007	ariadne	Russian Academy of Sciences, Zoological Institute	V.Lukhtanov	Kazakhstan	East Kazakhstan	Altai	Narymski Khrebet	Slavyanka	48.854	83.5502	450
LOWAM288-11	CCDB-03027_G02		658[0n]	2	ari1	25-May-2007	ariadne	Russian Academy of Sciences, Zoological Institute	V.Lukhtanov	Kazakhstan	East Kazakhstan	Altai	Narymski Khrebet	Slavyanka	48.854	83.5502	450
LOWAM289-11	CCDB-03027_G03		658[0n]	2	ari1	25-May-2007	ariadne	Russian Academy of Sciences, Zoological Institute	V.Lukhtanov	Kazakhstan	East Kazakhstan	Altai	Narymski Khrebet	Slavyanka	48.854	83.5502	450
LOWAM290-11	CCDB-03027_G04		658[0n]	2	ari1	25-May-2007	ariadne	Russian Academy of Sciences, Zoological Institute	V.Lukhtanov	Kazakhstan	East Kazakhstan	Altai	Narymski Khrebet	Slavyanka	48.854	83.5502	450
LOWAM292-11	CCDB-03027_G06		658[0n]	2	ari4	04-Jun-2007	ariadne	Russian Academy of Sciences, Zoological Institute	V.Lukhtanov	Kazakhstan	East Kazakhstan	Altai		Mramornyi pereval	48.4667	85.8667	950
LOWAM295-11	CCDB-03027_G09		658[0n]	2	ari3	07-Jun-2007	ariadne	Russian Academy of Sciences, Zoological Institute	V.Lukhtanov	Kazakhstan	East Kazakhstan	Altai		Kyzyltas	48.2667	85.4333	675
LOWAM296-11	CCDB-03027_G10		658[0n]	2	ari3	07-Jun-2007	ariadne	Russian Academy of Sciences, Zoological Institute	V.Lukhtanov	Kazakhstan	East Kazakhstan	Altai		Kyzyltas	48.2667	85.4333	675
LOWAM301-11	CCDB-03027_H03		658[0n]	2	ari2	10-Jun-2007	ariadne clarus	Russian Academy of Sciences, Zoological Institute	V.Lukhtanov	Kazakhstan	East Kazakhstan	Saur Mts		Malyi Zheminey			1300
MA225			658	2	ari5	01-July-2022	ariadne erlik	Russian Academy of Sciences, Zoological Institute	V.Lukhtanov	Russia	Altai		10 km N of Kosh-Agach		50.084046	88.730638E	2166
