# Supplementary material for: Taxonomic Structure and Wing Pattern Evolution in the <em>Parnassius mnemosyne </em>Species Complex (Lepidoptera, Papilionidae)
Source: Preprints.org preprint supplement (doi:10.20944/preprints202311.1419.v1), 2023-11-22
Supplement: Supplementary file 2 [file Supplementary_Material_03.docx]

**Supplementary Material 3. Reconstruction of ancestral states**

To reconstruct the probabilities of ancestral states, a Bayesian approach was used as implemented in the program MrBayes3.2 (Ronquist et al., 2012). The states studied were coded as 0 (absence of red spots) and 1 (presence of red spots). These states were implemented into a matrix of molecular features. The probability of ancestral states for each node was calculated separately. The command block used to analyze ancestral states is given in Supplementary Material 2.

**
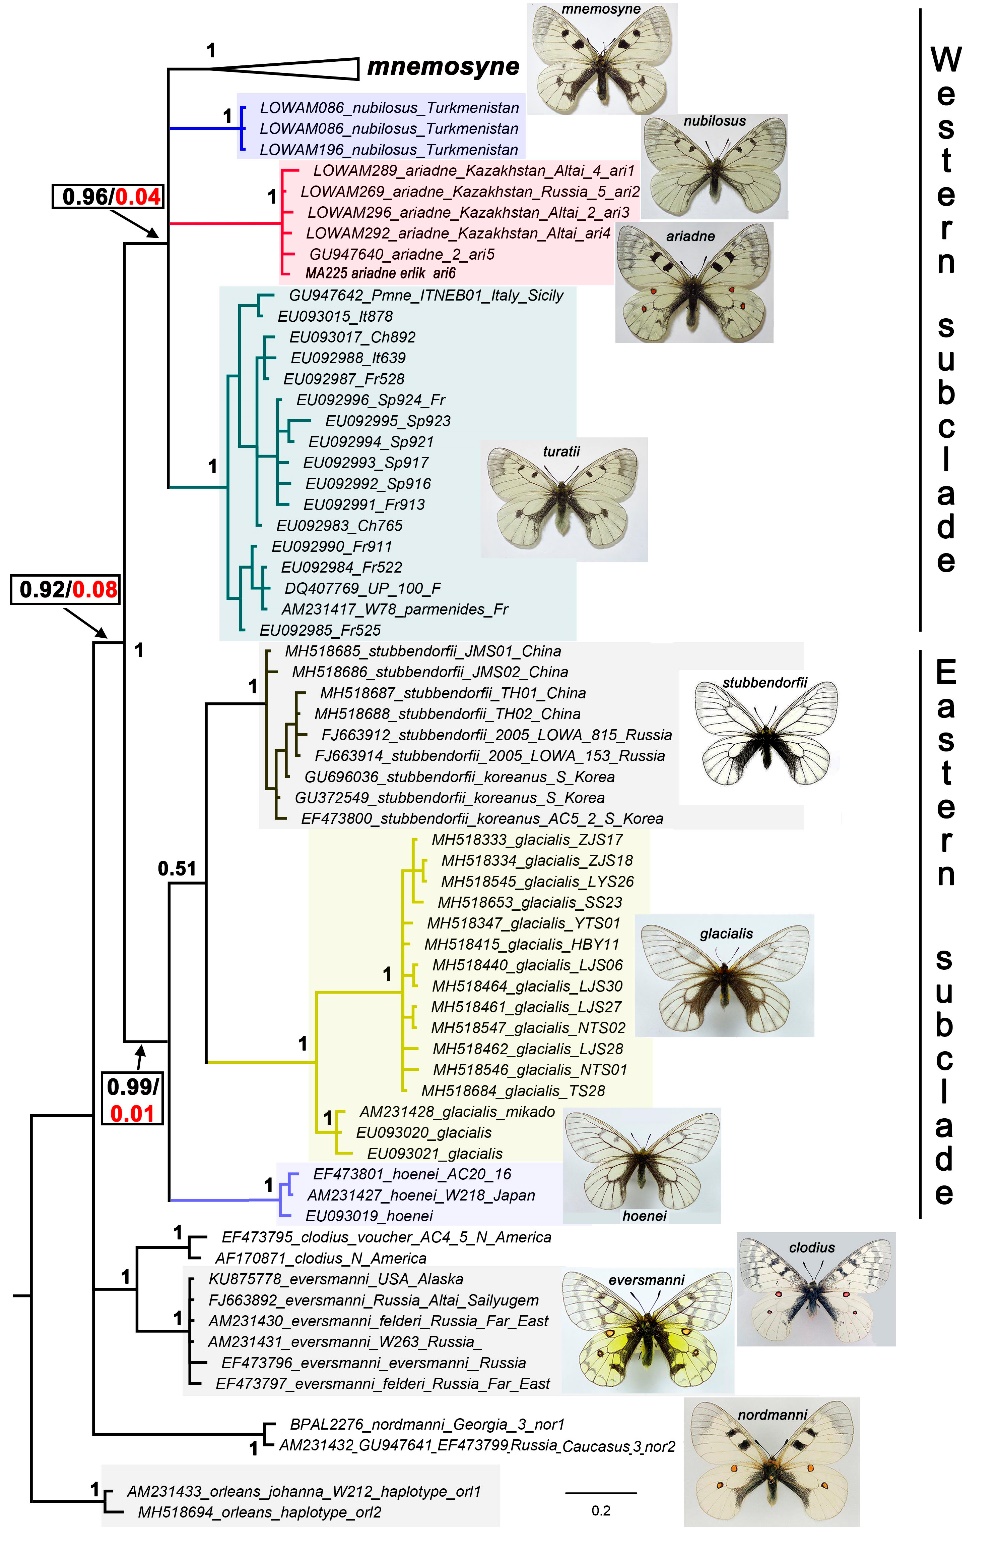
**

**Figure 1.** The Bayesian tree of the *Parnassius* (*Driopa*) species based on analysis of the mitochondrial *COI* barcodes. Numbers at nodes indicate Bayesian posterior probabilities (BPP) (higher than 0.5). Black/red values in the rectangles show the probabilities of the ancestral states “absence of red spots”/”presence of red spots” in the clades (1) (*mnemosyne* +*ariadne*) [0.96/0.04], (2) [(*mnemosyne* +*ariadne*)+(*stubbendorfii*+*glacialis*+*hoenei*)] [0.92/0.08] and (3) (*stubbendorfii*+*glacialis*+*hoenei*) [0.99/0.01]

Ancestral state was reconstructed using MrBayes 3.2.7

MrBayes version 3.2 Manual: Tutorials and Model Summaries

Fredrik Ronquist, John P. Huelsenbeck, Maxim Teslenko, Chi Zhang, Johan A. A. Nylander

Draft version, July 2020

<https://github.com/NBISweden/MrBayes/blob/develop/doc/manual/Manual_MrBayes_v3.2.pdf>

**(1) (*mnemosyne* +*ariadne*) clade**

Probability of Ancestral state “no red spots” = 0.96±0.006

Parameter Mean Variance Lower Upper Median min ESS* avg ESS PSRF+

----------------------------------------------------------------------------------------------------------------

TL{all} 0.607933 0.003481 0.495735 0.718428 0.606854 190.49 191.39 0.999

r(A<->C){2} 0.049545 0.000215 0.025028 0.082874 0.048896 27.64 35.20 1.024

r(A<->G){2} 0.224390 0.001438 0.150871 0.297565 0.220734 22.81 35.43 1.001

r(A<->T){2} 0.039736 0.000063 0.025280 0.054317 0.038290 32.14 88.30 1.021

r(C<->G){2} 0.021513 0.000225 0.000421 0.055843 0.017037 31.28 38.51 1.000

r(C<->T){2} 0.644407 0.001830 0.561129 0.716927 0.646872 40.90 42.78 0.999

r(G<->T){2} 0.020410 0.000074 0.006173 0.036979 0.018717 43.86 64.22 1.000

pi(A){2} 0.302963 0.000283 0.269135 0.334567 0.304003 46.39 94.62 1.000

pi(C){2} 0.143621 0.000147 0.120124 0.167774 0.142642 59.51 66.54 1.020

pi(G){2} 0.142983 0.000151 0.117416 0.164763 0.142850 104.59 142.86 1.002

pi(T){2} 0.410433 0.000311 0.375599 0.443693 0.409026 99.23 113.17 1.007

alpha{2} 0.560108 0.065787 0.218632 1.068296 0.493593 30.88 46.96 0.999

pinvar{2} 0.493192 0.008850 0.324925 0.677312 0.503376 30.00 37.69 1.000

m{1} 4.982152 10.976314 0.202689 11.016320 4.349071 309.64 344.20 0.999

m{2} 0.993911 0.000026 0.984631 1.001159 0.994880 309.64 344.20 0.999

p(0){1@mnemosyne_clade} 0.034947 0.006044 0.000001 0.208347 0.005012 54.98 74.07 1.000

p(1){1@mnemosyne_clade} 0.965053 0.006044 0.790442 0.999999 0.994989 54.98 74.07 1.000

----------------------------------------------------------------------------------------------------------------

* Convergence diagnostic (ESS = Estimated Sample Size); min and avg values

correspond to minimal and average ESS among runs.

ESS value below 100 may indicate that the parameter is undersampled.

+ Convergence diagnostic (PSRF = Potential Scale Reduction Factor; Gelman

and Rubin, 1992) should approach 1.0 as runs converge.

**(2) [(*mnemosyne* +*ariadne*)+(*stubbendorfii*+*glacialis*+*hoenei*)] clade**

Probability of Ancestral state “no red spots” = 0.92±0.019

Parameter Mean Variance Lower Upper Median min ESS* avg ESS PSRF+

-----------------------------------------------------------------------------------------------------------------

TL{all} 0.598457 0.003300 0.479592 0.710142 0.596399 166.16 200.55 1.004

r(A<->C){2} 0.050037 0.000232 0.018536 0.076674 0.049107 34.07 43.13 0.999

r(A<->G){2} 0.223385 0.001893 0.149845 0.312143 0.220690 16.24 16.90 1.014

r(A<->T){2} 0.039723 0.000063 0.026157 0.055535 0.038529 62.44 63.13 1.006

r(C<->G){2} 0.024964 0.000411 0.000883 0.063662 0.019050 20.23 27.71 1.000

r(C<->T){2} 0.642032 0.002280 0.541108 0.721861 0.647017 9.97 14.31 1.010

r(G<->T){2} 0.019857 0.000066 0.006026 0.035787 0.018642 26.37 28.19 1.009

pi(A){2} 0.305557 0.000254 0.276933 0.340037 0.304288 60.95 71.88 1.001

pi(C){2} 0.144041 0.000131 0.123010 0.167293 0.144423 42.44 63.41 1.009

pi(G){2} 0.142076 0.000174 0.120838 0.170437 0.140927 32.97 45.58 1.012

pi(T){2} 0.408325 0.000241 0.380908 0.438656 0.409277 54.42 67.69 1.000

alpha{2} 0.557583 0.068148 0.180256 1.043169 0.494943 15.36 30.35 1.003

pinvar{2} 0.494900 0.009709 0.289974 0.672539 0.509138 9.92 21.80 1.000

m{1} 5.012332 12.059038 0.081419 11.808920 4.282275 336.75 365.77 1.001

m{2} 0.993865 0.000028 0.983473 1.001398 0.994982 336.75 365.77 1.001

p(0){1@mnemosyne_clade2} 0.083020 0.019270 0.000179 0.329243 0.036804 27.93 57.45 1.016

p(1){1@mnemosyne_clade2} 0.916980 0.019270 0.670498 0.999782 0.963255 27.93 57.45 1.016

-----------------------------------------------------------------------------------------------------------------

* Convergence diagnostic (ESS = Estimated Sample Size); min and avg values

correspond to minimal and average ESS among runs.

ESS value below 100 may indicate that the parameter is undersampled.

+ Convergence diagnostic (PSRF = Potential Scale Reduction Factor; Gelman

and Rubin, 1992) should approach 1.0 as runs converge.

**(3) (*stubbendorfii*+*glacialis*+*hoenei*)] clade**

Probability of Ancestral state “no red spots” = 0.99±0.001

Parameter Mean Variance Lower Upper Median min ESS* avg ESS PSRF+

--------------------------------------------------------------------------------------------------------------------

TL{all} 0.598549 0.003270 0.491822 0.717121 0.597192 163.85 224.87 1.008

r(A<->C){2} 0.053960 0.000229 0.023775 0.082434 0.052604 42.20 54.83 1.012

r(A<->G){2} 0.220837 0.001467 0.156058 0.295003 0.218292 17.32 21.17 1.003

r(A<->T){2} 0.040328 0.000064 0.023879 0.054431 0.039781 29.30 46.62 1.010

r(C<->G){2} 0.021933 0.000258 0.000465 0.052717 0.017961 34.18 51.02 1.001

r(C<->T){2} 0.642171 0.001755 0.552173 0.712290 0.641969 15.14 20.93 1.001

r(G<->T){2} 0.020771 0.000066 0.008143 0.034832 0.019767 63.47 66.40 1.000

pi(A){2} 0.304876 0.000285 0.269047 0.333987 0.304741 65.52 71.73 1.012

pi(C){2} 0.145445 0.000170 0.121690 0.169303 0.145278 63.99 66.19 1.008

pi(G){2} 0.142943 0.000176 0.117862 0.169670 0.142629 44.25 56.49 0.999

pi(T){2} 0.406736 0.000316 0.373710 0.442883 0.406925 60.22 74.09 1.001

alpha{2} 0.684629 0.094181 0.259595 1.354860 0.618408 22.32 32.77 1.081

pinvar{2} 0.532285 0.007768 0.373668 0.703313 0.545572 21.92 26.78 1.080

m{1} 4.929505 10.673132 0.572707 11.403790 4.290773 367.20 371.67 1.001

m{2} 0.993992 0.000025 0.984092 1.000653 0.994972 367.20 371.67 1.001

p(0){1@stubbendorfii_clade} 0.006969 0.000148 0.000001 0.028064 0.002567 110.77 143.72 1.000

p(1){1@stubbendorfii_clade} 0.993031 0.000148 0.971818 0.999999 0.997446 110.77 143.72 1.000

--------------------------------------------------------------------------------------------------------------------

* Convergence diagnostic (ESS = Estimated Sample Size); min and avg values

correspond to minimal and average ESS among runs.

ESS value below 100 may indicate that the parameter is undersampled.

+ Convergence diagnostic (PSRF = Potential Scale Reduction Factor; Gelman

and Rubin, 1992) should approach 1.0 as runs converge.

**Alignment and command block for reconstruction of the ancestral states in the clade (1) (*mnemosyne* +*ariadne*)**

#NEXUS

BEGIN DATA;

DIMENSIONS NTAX=125 NCHAR=655;

format datatype=mixed(standard:1,DNA:2-655) interleave=yes gap=- missing=?;

MATRIX

Parnassius_orleans_AC10_5 0

LOWAM001_Kyrgyzstan_Alai_10 1

LOWAM004_Uzbekistan_Gissar_38 1

LOWAM007_Kyrgyzstan_TianShan24 1

LOWAM009_Kyrgyzstan_TianShan_6 1

LOWAM013_Turkey_Georgia_3 1

LOWAM014_Turkey_Ovitdagi_1 1

LOWAM015_Don_Borisovka_Saratov 1

LOWAM018_Kyrgyzstan_Karamyk 1

LOWAM019_Kyrgyzstan_Karamyk 1

LOWAM021_Russia_Saratov 1

LOWAM023_Saratov_Luga_Vologda_4 1

LOWAM027_Kazakhstan_Karatau_2 1

LOWAM037_Russia_Pskovskaya 1

LOWAM038_Kyrgyzstan_Tjuz_Ashu_3 1

LOWAM039_Kyrgyzstan_23 1

LOWAM044_Russia_Borisovra_3 1

LOWAM045_Tajikistan_Shakhristan_3 1

LOWAM067_Kazakhstan_Kaindy_1 1

LOWAM069_Russia_Teberda_2 1

LOWAM073_Kyrgyzstan_Takhtalyk1 1

LOWAM074_Kyrgyzstan_Naryntoo 1

LOWAM086_Turkmenistan_3 1

LOWAM087_Uzbekistan_Sarchashma 1

LOWAM095_Kyrgyzstan_Sosnovka 1

LOWAM096_Gissar_5 1

LOWAM098_Tajikistan_Khondiza1 1

LOWAM099_Uzbekistan_Kamchik_2 1

LOWAM100_Kyrgyzstan_Konduk 1

LOWAM115_Azerbaijan_Nyus_Nyus 1

LOWAM116_Iran_Dizin_2 1

LOWAM122_Russia_Saratow_1 1

LOWAM136_Uzbekistan_Tamshush_1 1

LOWAM149_Kyrgyzstan_Songkel_1 1

LOWAM198_Turkey_Aladaglar_2 1

LOWAM213_Tajikistan_Tandukul_1 1

Parnassius_clodius 0

Parnassius_eversmanni_2005_LOWA_108 0

Parnassius_eversmanni_2005_LOWA_107 0

Parnassius_stubbendorfii_2005_LOWA_815 1

Parnassius_stubbendorfii_2005_LOWA_154 1

Parnassius_stubbendorfii_2005_LOWA_153 1

Parnassius_nordmanni 0

Parnassius_eversmanni 0

Parnassius_eversmanni_felderi 0

Parnassius_ariadne_ariadne 0

Parnassius_glacialis_mikado 1

Parnassius_stubbendorfii_hoenei 1

Parnassius_stubbendorfii_hoenei_AC20_16 1

Parnassius_stubbendorfii_koreanus 1

Parnassius_nordmanni_AC20_5 0

Parnassius_eversmanni_felderi_AC23_68 0

Parnassius_eversmanni_eversmanni_AC1_14 0

Parnassius_clodius_AC4_5 0

Parnassius_ariadne_AC4_14 0

HQ004911_RV_07_C107_Romania 1

HQ004908_RV_07_D060_Romania 1

HQ004907_RV_08_M274_Romania 1

HQ004902_RV_08_M361_Romania 1

GU947642_Pmne_ITNEB01_Italy_Sicily 1

EU093018_Ca995 1

EU093017_Ch892 1

EU093016_Tk889 1

EU093015_It878 1

EU093014_Hu875 1

EU093013_Sk872_Cz_Slova 1

EU093011_Cz869 1

EU093010_Ru_Bosnia_Fi_Bu_Hu_Bel_Po_Rom_Ukr_ 1

EU093009_Kz848 1

EU093007_Fi810 1

EU093004_Tu999 1

EU093000_Bu961 1

EU092998_Bu951 1

EU092997_Ru940 1

EU092996_Sp924_Fr 1

EU092995_Sp923 1

EU092994_Sp921 1

EU092993_Sp917 1

EU092992_Sp916 1

EU092991_Fr913 1

EU092990_Fr911 1

EU092988_It639 1

EU092987_Fr528 1

EU092985_Fr525 1

EU092984_Fr522 1

EU092983_Ch765 1

EU092982_Pl653_Slova_Ukr 1

EU092981_At626 1

EU092980_At622 1

EU092978_At618_At_Slo 1

EU092977_At606_At_Cz_D_Fi_Hu_Po_Slova 1

EU092976_At602 1

EU092975_D757 1

EU092974_D756 1

EU092973_D744 1

EU092971_Hu697_Bu_Hu 1

EU092969_Bu775 1

EU092968_Bu772 1

EU093003_D982 1

DQ407769_UP_100_F 1

AM231426_W336_parvisi_Gre 1

AM231425_W333_angorae_Tur 1

AM231424_W331_angorae_Tur_Ankara 1

AM231423_W329_gigantea_Uzb_Chatkal 1

AM231422_W330_orientalis_Zailijskiy 1

AM231421_W292_ochracea_Tadj_Zeravsh_ 1

AM231420_W280_farsica_Iran_Fars 1

AM231419_W311_pseudonubilosus_Iran_Urmia 1

AM231418_W335_sheljuzhkoi_Tur_Adana 1

AM231417_W78_parmenides_Fr 1

EU836682_h_1_32_Rus 1

EU836681_h_1_31_Rus 1

EU836680_A_Bo_Bu_Cr_Cz_Hu_Sl_Li_Fi_Po_Ru 1

EU836675_h_1_19_It 1

EU836674_h_1_18_At_It 1

EU836672_h_1_10_It 1

EU836671_h_1_09_It 1

EU836670_h_1_07_Gre 1

EU836669_h_1_06_Gre 1

EU836668_h_1_05_Gre 1

EU836667_h_1_04_Gre 1

EU836666_h_1_03_Mac 1

EU836665_h_1_02_Gre_Mac 1

EU836664_h_2_06_At_It 1

EU836663_h_2_05_It 1

Parnassius_orleans_AC10_5 ------------------------TGAGCAGGTATAATAGGAACCTCTTTAAGATTATTAATTCGTACTGAATTAGGTAATCCTGGATCTTTAATTGGAGATGATCAAATTTATAACACTATTGTAACAGCTCATGCTTTTATTATAATTTTTTTTATAGTTATACCAATTATAATTGGAGGATTTGGAAATTGATTAATTCCATTAATATTAGGAGCCCCAGATATAGCTTTCCCCCGAATAAATAATATAAGATTTTGACTATTACCCCCCTCATTAACCTTATTAATTTCCAGAAGAATCGTAGAAAATGGAGCAGGAACTGGATGAACAGTTTATCCCCCTTTATCCTCTAATATTGCCCATAGTGGAAGATCAGTTGATTTAGCTATCTTTTCTTTACATTTAGCTGGAATTTCATCTATTTTAGGAGCTATTAATTTTATTACAACTATTATTAATATACGAATTAATCATATATCATTTGATCAAATACCCCTTTTCGTATGAGCAGTAGGAATTACTGCTTTACTTTTATTATTATCTTTACCTGTTTTAGCAGGTGCTATTACTATACTTCTTACAGATCGAAATCTTAATACTTCATTTTTTGATCCAGCAGGAGGTGGAGATCCTATTTTATACCAACATTTA

LOWAM001_Kyrgyzstan_Alai_10 ACACTATATTTTATTTTTGGTATTTGAGCAGGTATAGTAGGAACCTCTTTAAGATTATTAATTCGTACTGAATTAGGTAATCCTGGATCTTTAATTGGAGATGATCAAATTTATAATACTATTGTAACAGCTCATGCTTTTATTATAATTTTTTTCATAGTTATACCAATTATAATTGGAGGATTTGGAAATTGATTAATTCCTTTAATATTAGGAGCCCCAGATATAGCTTTTCCTCGAATAAATAATATAAGATTTTGATTACTACCCCCTTCATTAACTTTATTAATTTCTAGAAGAATTGTAGAAAATGGAGCAGGAACAGGATGAACAGTTTATCCCCCTTTATCATCTAATATCGCTCATAGAGGTAGTTCAGTTGATTTAGCTATTTTTTCTTTACATTTAGCAGGAATTTCATCAATTTTAGGAGCTATTAATTTCATTACAACTATTATTAATATACGAATTAACCATATATCATTTGATCAAATACCCCTCTTTGTATGAGCAGTAGGAATTACTGCTTTACTTTTATTATTATCTTTACCTGTATTAGCTGGTGCTATTACTATATTATTAACAGATCGAAATCTTAATACTTCATTTTTTGATCCTGCAGGAGGTGGAGATCCTATTTTATATCAACATTTA

LOWAM004_Uzbekistan_Gissar_38 ACACTATATTTTATTTTTGGTATTTGAGCAGGTATAGTAGGAACCTCTTTAAGATTATTAATTCGTACTGAATTAGGTAATCCTGGATCTTTAATTGGAGATGATCAAATTTATAATACTATTGTAACAGCTCATGCTTTTATTATAATTTTTTTCATAGTTATACCAATTATAATTGGAGGATTTGGAAATTGATTAATTCCTTTAATATTAGGAGCCCCAGATATAGCTTTTCCTCGAATAAATAATATAAGATTTTGATTACTACCCCCTTCATTAACTTTATTAATTTCCAGAAGAATTGTAGAAAATGGAGCAGGAACAGGATGAACAGTTTATCCCCCTTTATCATCTAATATCGCTCATAGAGGTAGTTCAGTTGATTTAGCTATTTTTTCTTTACATTTAGCAGGAATTTCATCAATTTTAGGAGCTATTAATTTCATTACAACTATTATTAATATACGAATTAACCATATATCATTTGATCAAATACCCCTCTTTGTATGAGCAGTAGGAATTACTGCTTTACTTTTATTATTATCTTTACCTGTATTAGCTGGTGCTATTACTATATTATTAACAGATCGAAATCTTAATACTTCATTTTTTGATCCTGCAGGAGGTGGAGATCCTATTTTATATCAACATTTA

LOWAM007_Kyrgyzstan_TianShan24 ACACTATATTTTATTTTTGGTATTTGAGCAGGTATAGTAGGAACCTCTTTAAGATTATTAATTCGTACTGAATTAGGTAATCCTGGATCTTTAATTGGAGATGATCAAATTTATAATACTATTGTAACAGCTCATGCTTTTATTATAATTTTTTTTATAGTTATACCAATTATAATTGGAGGATTTGGAAATTGATTAATTCCTTTAATATTAGGGGCCCCAGATATAGCTTTTCCTCGAATAAATAATATAAGATTTTGATTATTACCCCCTTCATTAACTTTATTAATTTCTAGAAGAATTGTAGAAAATGGAGCAGGAACAGGATGAACAGTTTATCCCCCTTTATCATCTAATATCGCTCATAGAGGTAGTTCAGTTGATTTAGCTATTTTTTCTTTACATTTAGCAGGAATTTCATCAATCTTAGGAGCTATTAATTTTATTACAACTATTATTAATATACGAATTAATCATATATCATTTGATCAAATACCTCTCTTTGTATGAGCAGTAGGAATTACTGCTTTACTTTTATTACTATCTTTACCTGTATTAGCTGGTGCTATTACTATATTATTAACAGATCGAAATCTTAATACTTCATTTTTTGATCCTGCAGGAGGTGGAGATCCTATTTTATATCAACATTTA

LOWAM009_Kyrgyzstan_TianShan_6 ACACTATATTTTATTTTTGGTATTTGAGCAGGTATAGTAGGAACCTCTTTAAGATTATTAATTCGTACTGAATTAGGTAATCCTGGATCTTTGATTGGAGATGATCAAATTTATAATACTATTGTAACAGCTCATGCTTTTATTATAATTTTTTTTATAGTTATACCAATTATAATTGGAGGATTTGGAAATTGATTAATTCCTTTAATATTAGGGGCCCCAGATATAGCTTTTCCTCGAATAAATAATATAAGATTTTGATTATTACCCCCTTCATTAACTTTATTAATTTCTAGAAGAATTGTAGAAAATGGAGCAGGAACAGGATGAACAGTTTATCCCCCTTTATCATCTAATATCGCTCATAGAGGTAGTTCAGTTGATTTAGCTATTTTTTCTTTACATTTAGCAGGAATTTCATCAATCTTAGGAGCTATTAATTTTATTACAACTATTATTAATATACGAATTAATCATATATCATTTGATCAAATACCTCTCTTTGTATGAGCAGTAGGAATTACTGCTTTACTTTTATTACTATCTTTACCTGTATTAGCTGGTGCTATTACTATATTATTAACAGATCGAAATCTTAATACTTCATTTTTTGATCCTGCAGGAGGTGGAGATCCTATTTTATATCAACATTTA

LOWAM013_Turkey_Georgia_3 ACACTATATTTTATTTTTGGTATTTGAGCAGGTATAGTAGGAACCTCTTTAAGATTATTAATTCGTACTGAATTAGGTAATCCTGGATCTTTAATTGGAGATGATCAAATTTATAATACTATTGTAACAGCTCATGCTTTTATTATAATTTTTTTTATAGTTATACCAATTATAATTGGAGGATTTGGAAATTGATTAATTCCTTTAATATTAGGAGCCCCAGATATAGCTTTTCCTCGAATAAATAATATAAGATTTTGATTACTGCCCCCCTCATTAACTTTATTAATTTCTAGAAGAATTGTAGAAAATGGAGCAGGAACAGGATGAACAGTTTATCCCCCTTTATCATCTAATATCGCTCATAGAGGTAGTTCAGTTGATTTAGCTATTTTTTCTTTACATTTAGCAGGAATTTCATCAATCTTAGGAGCTATTAATTTTATTACAACTATTATTAATATACGAATTAACCATATATCATTTGATCAAATACCTCTCTTTGTATGAGCAGTAGGAATTACTGCTTTACTTTTATTATTATCTTTACCTGTATTAGCTGGTGCTATTACTATATTATTAACAGATCGAAATCTTAATACTTCATTTTTTGATCCTGCAGGAGGTGGAGATCCTATTTTATATCAACATTTA

LOWAM014_Turkey_Ovitdagi_1 ACACTATATTTTATTTTTGGTATTTGAGCAGGTATAGTAGGAACCTCTTTAAGATTATTAATTCGTACTGAATTAGGTAATCCTGGATCTTTAATTGGAGATGATCAAATTTATAATACTATTGTAACAGCTCATGCTTTTATTATAATTTTTTTTATAGTTATACCAATTATAATTGGAGGATTTGGAAATTGATTAATTCCTTTAATATTAGGAGCCCCAGATATAGCTTTTCCTCGAATAAATAATATAAGATTTTGATTACTGCCCCCCTCATTAACTTTATTAATTTCCAGAAGAATTGTAGAAAATGGAGCAGGAACAGGATGAACAGTTTATCCCCCTTTATCATCTAATATCGCTCATAGAGGTAGTTCAGTTGATTTAGCTATTTTTTCTTTACATTTAGCAGGAATTTCATCAATCTTAGGAGCTATTAATTTTATTACAACTATTATTAATATACGAATTAACCATATATCATTTGATCAAATACCTCTCTTTGTATGAGCAGTAGGAATTACTGCTTTACTTTTATTATTATCTTTACCTGTATTAGCTGGTGCTATTACTATATTATTAACAGATCGAAATCTTAATACTTCATTTTTTGATCCTGCAGGAGGTGGAGATCCTATTTTATATCAACATTTA

LOWAM015_Don_Borisovka_Saratov ACACTATATTTTATTTTTGGTATTTGAGCAGGTATAGTAGGAACCTCTTTAAGATTATTAATTCGTACTGAATTAGGTAATCCTGGATCTTTAATTGGAGATGATCAAATTTATAATACTATTGTAACAGCTCATGCTTTTATTATAATTTTTTTTATAGTTATACCAATTATAATTGGAGGATTTGGAAATTGATTAATTCCTTTAATATTAGGAGCCCCAGATATAGCTTTTCCTCGAATAAATAATATAAGATTTTGATTACTACCCCCCTCATTAACTTTATTAATTTCTAGAAGAATTGTAGAAAATGGAGCAGGAACAGGATGAACAGTTTATCCCCCTTTATCATCTAATATCGCTCATAGAGGTAGTTCAGTTGATTTAGCTATTTTTTCTTTACATTTAGCAGGAATTTCATCAATCTTAGGAGCTATTAATTTTATTACAACTATTATTAATATACGAATTAACCATATATCATTTGATCAAATACCTCTCTTTGTATGAGCAGTAGGAATTACTGCTTTACTTTTATTATTATCTTTACCTGTATTAGCTGGTGCTATTACTATATTATTAACAGATCGAAATCTTAATACTTCATTTTTTGATCCTGCAGGAGGTGGGGATCCTATTTTATATCAACATTTA

LOWAM018_Kyrgyzstan_Karamyk ACACTATATTTTATTTTTGGTATTTGAGCAGGTATAGTAGGAACCTCTTTAAGATTATTAATTCGTACTGAATTAGGTAATCCTGGATCTTTAATTGGAGATGATCAAATTTATAATACTATTGTAACAGCTCATGCTTTTATTATAATTTTTTTTATAGTTATACCAATTATAATTGGAGGATTTGGAAATTGATTAATTCCTTTAATATTAGGAGCCCCAGATATAGCTTTTCCTCGAATAAATAATATAAGATTTTGATTACTACCCCCTTCATTAACTTTATTAATTTCTAGAAGAATTGTAGAAAATGGAGCAGGAACAGGATGAACAGTTTATCCCCCTTTATCATCTAATATCGCTCATAGAGGTAGTTCAGTTGATTTAGCTATTTTTTCTTTACATTTAGCAGGAATTTCATCAATTTTAGGAGCTATTAATTTCATTACAACTATTATTAATATACGAATTAACCATATATCATTTGATCAAATACCCCTCTTTGTATGAGCAGTAGGAATTACTGCTTTACTTTTATTATTATCTTTACCTGTATTAGCTGGTGCTATTACTATATTATTAACAGATCGAAATCTTAATACTTCATTTTTTGATCCAGCAGGAGGTGGAGATCCTATTTTATATCAACATTTA

LOWAM019_Kyrgyzstan_Karamyk ACACTATATTTTATTTTTGGTATTTGAGCAGGTATAGTAGGAACCTCTTTAAGATTATTAATTCGTACTGAATTAGGTAATCCTGGATCTTTAATTGGAGATGATCAAATTTATAATACTATTGTAACAGCTCATGCTTTTATTATAATTTTTTTCATAGTTATACCAATTATAATTGGAGGATTTGGAAATTGATTAATTCCTTTAATATTAGGAGCCCCAGATATAGCTTTTCCTCGAATAAATAATATAAGATTTTGATTACTACCCCCTTCATTAACTTTATTAATTTCTAGAAGAATTGTAGAAAATGGAGCAGGAACAGGATGAACA?TTTATCCCCCTTTATCATCTAATATCGCTCATAGAGGTAGTTCAGTTGATTTAGCTATTTTTTCTTTACATTTAGCAGGAATTTCATCAATTTTAGGGGCTATTAATTTCATTACAACTATTATTAATATACGAATTAACCATATATCATTTGATCAAATACCCCTCTTTGTATGAGCAGTAGGAATTACTGCTTTACTTTTATTATTATCTTTACCTGTATTAGCTGGTGCTATTACTATATTATTAACAGATCGAAATCTTAATACTTCATTTTTTGATCCTGCAGGAGGTGGAGATCCTATTTTATATCAACATTTA

LOWAM021_Russia_Saratov ACACTATATTTTATTTTTGGTATTTGAGCAGGTATAGTAGGAACCTCTTTAAGATTATTAATTCGTACTGAATTAGGTAATCCTGGATCTTTAATTGGAGATGATCAAATTTATAATACTATTGTAACAGCTCATGCTTTTATTATAATTTTTTTTATAGTTATACCAATTATAATTGGAGGATTTGGAAATTGATTAATTCCTTTAATATTAGGAGCCCCAGATATAGCTTTTCCTCGAATAAATAATATAAGATTTTGATTACTACCCCCCTCATTAACTTTATTAATTTCTAGAAGAATTGTAGAAAATGGAGCAGGAACAGGATGAACAGTTTATCCCCCTTTATCATCTAATATCGCTCATAGAGGTAGTTCAGTTGATTTAGCTATTTTTTCTTTACATTTAGCAGGAATTTCATCAATCTTAGGAGCTATTAATTTTATTACAACTATTATTAATATACGAATTAACCATATATCATTTGATCAAATACCTCTCTTTGTATGAGCAGTAGGAATTACTGCTTTACTTTTATTATTATCTTTACCTGTATTAGCTGGTGCTATTACTATATTATTAACAGATCGAAATCTTAATAATTCATTTTTTGATCCTGCAGGAGGTGGGGATCCTATTTTATATCAACATTTA

LOWAM023_Saratov_Luga_Vologda_4 ACACTATATTTTATTTTTGGTATTTGAGCAGGTATAGTAGGAACCTCTTTAAGATTATTAATTCGTACTGAATTAGGTAATCCTGGATCTTTAATTGGAGATGATCAAATTTATAATACTATTGTAACAGCTCATGCTTTTATTATAATTTTTTTTATAGTTATACCAATTATAATTGGAGGATTTGGAAATTGATTAATTCCTTTAATATTAGGAGCCCCAGATATAGCTTTTCCTCGAATAAATAATATAAGATTTTGATTACTACCCCCCTCATTAACTTTATTAATTTCTAGAAGAATTGTAGAAAATGGAGCAGGAACAGGATGAACAGTTTATCCCCCTTTATCATCTAATATCGCTCATAGAGGTAGTTCAGTTGATTTAGCTATTTTTTCTTTACATTTAGCAGGAATTTCATCAATCTTAGGAGCTATTAATTTTATTACAACTATTATTAATATACGAATTAACCATATATCATTTGATCAAATACCTCTCTTTGTATGAGCAGTAGGAATTACTGCTTTACTTTTATTATTATCTTTACCTGTATTAGCTGGTGCTATTACTATATTATTAACAGATCGAAATCTTAATACTTCATTTTTTGATCCTGCAGGAGGTGGAGATCCTATTTTATATCAACATTTA

LOWAM027_Kazakhstan_Karatau_2 ACACTATATTTTATTTTTGGTATTTGAGCAGGTATAGTAGGAACCTCTTTAAGATTATTAATTCGTACTGAATTAGGTAATCCTGGATCTTTAATTGGAGATGATCAAATTTATAATACTATTGTAACAGCTCATGCTTTTATTATAATTTTTTTTATAGTTATACCAATTATAATTGGAGGATTTGGAAATTGATTAATTCCTTTAATATTAGGGGCCCCAGATATAGCTTTTCCTCGAATAAATAATATAAGATTTTGATTATTACCCCCTTCATTAACTTTATTAATTTCTAGAAGAATTGTAGAAAATGGAGCAGGAACAGGATGAACAGTTTATCCCCCTTTATCATCTAATATCGCTCATAGAGGTAGTTCAGTTGATTTAGCTATTTTTTCTTTACATTTAGCAGGAATTTCATCAATCTTAGGAGCTATTAATTTTATTACAACTATTATTAATATACGAATTAATCATATATCATTTGATCAAATACCTCTCTTTGTATGAGCAGTAGGAATTACTGCTTTACTTTTATTACTATCCTTACCTGTATTAGCTGGTGCTATTACTATATTATTAACAGATCGAAATCTTAATACTTCATTTTTTGATCCTGCAGGAGGTGGAGATCCTATTTTATATCAACATTTA

LOWAM037_Russia_Pskovskaya ---------TTTATTTTTGGTATTTGAGCAGGTATAGTAGGAACCTCTTTAAGATTATTAATTCGTACTGAATTAGGTAATCCTGGATCTTTAATTGGAGATGATCAAATTTATAATACTATTGTAACAGCTCATGCTTTTATTATAATTTTTTTTATAGTTATACCAATTATAATTGGAGGATTTGGAAATTGATTAATTCCTTTAATATTAGGAGCCCCAGATATAGCTTTTCCTCGAATAAATAATATAAGATTTTGATTACTACCCCCCTCATTAACTTTATTAATTTCTAGAAGAATTGTAGAAAATGGAGCAGGAACAGGATGAACAGTTTATCCCCCTTTATCATCTAATATCGCTCATAGAGGTAGTTCAGTTGATTTAGCTATTTTTTCTTTACATTTAGCAGGAATTTCATCAATCTTAGGAGCTATTAATTTTATTACAACTATTATTAATATACGAATTAACCATATATCATTTGATCAAATACCTCTCTTTGTATGAGCAGTAGGAATTACTGCTTTACTTTTATTATTATCTTTACCTGTATTAGCTGGTGCTATTACTATATTATTAACAGATCGAAATCTTAATACTTCATTTTTTGATCCTGCAGGAGGTGGAGATCCTATTTTATATCAACATTTA

LOWAM038_Kyrgyzstan_Tjuz_Ashu_3 ACACTATATTTTATTTTTGGTATTTGAGCAGGTATAGTAGGAACCTCTTTAAGATTATTAATTCGTACTGAATTAGGTAATCCTGGATCTTTAATTGGAGATGATCAAATTTATAATACTATTGTAACAGCTCATGCTTTTATTATAATTTTTTTTATAGTTATACCAATTATAATTGGAGGATTTGGAAATTGATTAATTCCTTTAATATTAGGGGCCCCAGATATAGCTTTTCCTCGAATAAATAATATAAGATTTTGATTATTACCCCCTTCATTAACTTTATTAATTTCTAGAAGAATTGTAGAAAATGGAGCAGGAACAGGATGAACAATTTATCCCCCTTTATCATCTAATATCGCTCATAGAGGTAGTTCAGTTGATTTAGCTATTTTTTCTTTACATTTAGCGGGAATTTCATCAATCTTAGGAGCTATTAATTTTATTACAACTATTATTAATATACGAATTAATCATATATCATTTGATCAAATACCTCTCTTTGTATGAGCAGTAGGAATTACTGCTTTACTTTTATTACTATCTTTACCTGTATTAGCTGGTGCTATTACTATATTATTAACAGATCGAAATCTTAATACTTCATTTTTTGATCCTGCAGGAGGTGGAGATCCTATTTTATATCAACATTTA

LOWAM039_Kyrgyzstan_23 ACACTATATTTTATTTTTGGTATTTGAGCAGGTATAGTAGGAACCTCTTTAAGATTATTAATTCGTACTGAATTAGGTAATCCTGGATCTTTAATTGGAGATGATCAAATTTATAATACTATTGTAACAGCTCATGCTTTTATTATAATTTTTTTTATAGTTATACCAATTATAATTGGAGGATTTGGAAATTGATTAATTCCTTTAATATTAGGGGCCCCAGATATAGCTTTTCCTCGAATAAATAATATAAGATTTTGATTATTACCCCCTTCATTAACTTTATTAATTTCTAGAAGAATTGTAGAAAATGGAGCAGGAACAGGATGAACAGTTTATCCCCCTTTATCATCTAATATCGCTCATAGAGGTAGTTCAGTTGATTTAGCTATTTTTTCTTTACATTTAGCGGGAATTTCATCAATCTTAGGAGCTATTAATTTTATTACAACTATTATTAATATACGAATTAATCATATATCATTTGATCAAATACCTCTCTTTGTATGAGCAGTAGGAATTACTGCTTTACTTTTATTACTATCTTTACCTGTATTAGCTGGTGCTATTACTATATTATTAACAGATCGAAATCTTAATACTTCATTTTTTGATCCTGCAGGAGGTGGAGATCCTATTTTATATCAACATTTA

LOWAM044_Russia_Borisovra_3 ACACTATATTTTATTTTTGGTATTTGAGCAGGTATAGTAGGAACCTCTTTAAGATTATTAATTCGTACTGAATTAGGTAATCCTGGATCTTTAATTGGAGATGATCAAATTTATAATACTATTGTAACAGCTCATGCTTTTATTATAATTTTTTTTATAGTTATACCAATTATAATTGGAGGATTTGGAAATTGATTAATTCCCTTAATATTAGGAGCCCCAGATATAGCTTTTCCTCGAATAAATAATATAAGATTTTGATTACTACCCCCCTCATTAACTTTATTAATTTCTAGAAGAATTGTAGAAAATGGAGCAGGAACAGGATGAACAGTTTATCCCCCTTTATCATCTAATATCGCTCATAGAGGTAGTTCAGTTGATTTAGCTATTTTTTCTTTACATTTAGCAGGAATTTCATCAATCTTAGGAGCTATTAATTTTATTACAACTATTATTAATATACGAATTAACCATATATCATTTGATCAAATACCTCTCTTTGTATGAGCAGTAGGAATTACTGCTTTACTTTTATTATTATCTTTACCTGTATTAGCTGGTGCTATTACTATATTATTAACAGATCGAAATCTTAATACTTCATTTTTTGATCCTGCAGGAGGTGGAGATCCTATTTTATATCAACATTTA

LOWAM045_Tajikistan_Shakhristan_3 ACACTATATTTTATTTTTGGTATTTGAGCAGGTATAGTAGGAACCTCTTTAAGATTATTAATTCGTACTGAATTAGGTAATCCTGGATCTTTAATTGGAGATGATCAAATTTATAATACTATTGTAACAGCTCATGCTTTTATTATAATTTTTTTCATAGTTATACCAATTATAATTGGAGGATTTGGAAATTGATTAATTCCTTTAATATTAGGAGCCCCAGATATAGCTTTTCCTCGAATAAATAATATAAGATTTTGATTACTACCCCCTTCATTAACTTTATTAATTTCCAGAAGAATTGTAGAAAATGGAGCAGGAACAGGATGAACAGTTTATCCCCCTTTATCATCTAATATTGCTCATAGAGGTAGTTCAGTTGATTTAGCTATTTTTTCTTTACATTTAGCAGGAATTTCATCAATTTTAGGAGCTATTAATTTCATTACAACTATTATTAATATACGAATTAACCATATATCATTTGATCAAATACCCCTCTTTGTATGAGCAGTAGGAATTACTGCTTTACTTTTATTATTATCTTTACCTGTATTAGCTGGTGCTATTACTATATTATTAACAGATCGAAATCTTAATACTTCATTTTTTGATCCTGCAGGAGGTGGAGATCCTATTTTATATCAACATTTA

LOWAM067_Kazakhstan_Kaindy_1 ACACTATATTTTATTTTTGGTATTTGAGCAGGTATAGTAGGAACCTCTTTAAGATTATTAATTCGTACTGAATTAGGTAATCCTGGATCTTTAATTGGAGATGATCAAATTTATAATACTATTGTAACAGCTCATGCTTTTATTATAATTTTTTTTATAGTTATACCAATTATAATTGGAGGATTTGGAAATTGATTAATTCCTTTAATATTAGGGGCCCCAGATATAGCTTTTCCTCGAATAAATAATATAAGATTTTGATTATTACCCCCTTCATTAACTTTATTAATTTCTAGAATAATTGTAGAAAATGGAGCAGGAACAGGATGAACAGTTTATCCCCCTTTATCATCTAATATCGCTCATAGAGGTAGTTCAGTTGATTTAGCTATTTTTTCTTTACATTTAGCGGGAATTTCATCAATCTTAGGAGCTATTAATTTTATTACAACTATTATTAATATACGAATTAATCATATATCATTTGATCAAATACCTCTCTTTGTATGAGCAGTAGGAATTACTGCTTTACTTTTATTACTATCTTTACCTGTATTAGCTGGTGCTATTACTATATTATTAACAGATCGAAATCTTAATACTTCATTTTTTGATCCTGCAGGAGGTGGAGATCCTATTTTATATCAACATTTA

LOWAM069_Russia_Teberda_2 ---------TTTATTTTTGGTATTTGAGCAGGTATAGTAGGAACCTCTTTAAGATTATTAATTCGTACTGAATTAGGTAATCCTGGATCTTTAATTGGAGATGATCAAATTTATAATACTATTGTAACAGCTCATGCTTTTATTATAATTTTTTTTATAGTTATACCAATTATAATTGGAGGATTTGGAAATTGATTAATTCCTTTAATATTAGGAGCCCCAGATATAGCTTTTCCTCGAATAAATAATATAAGATTTTGATTACTGCCCCCCTCATTAACTTTATTAATTTCTAGAAGAATTGTAGAAAATGGAGCAGGAACAGGATGAACAGTTTATCCCCCTTTATCATCTAATATCGCTCATAGAGGTAGTTCAGTTGATTTAGCTATTTTTTCTTTACATTTAGCAGGAATTTCATCAATCTTAGGAGCTATTAATTTTATTACAACTATTATTAATATACGAATTAATCATATATCATTTGATCAAATACCTCTCTTTGTATGAGCAGTAGGAATTAC?GCTTTACTTTTATTATTATCTTTACCTGTATTAGCTGG?GCTATTACTATATTATTAACAGATCGAAATCT?AATACTTCATTTTTTGATCCTGCAGGAGGAGGAGATCCTATTTTATATCAACATTTA

LOWAM073_Kyrgyzstan_Takhtalyk1 ACACTATATTTTATTTTTGGTATTTGAGCAGGTATAGTAGGAACCTCTTTAAGATTATTAATTCGTACTGAATTAGGTAATCCTGGATCTTTAATTGGAGATGATCAAATTTATAATACTATTGTAACAGCTCATGCTTTTATTATAATTTTTTTTATAGTTATACCAATTATAATTGGAGGATTTGGAAATTGATTAATTCCTTTAATATTAGGGGCCCCAGATATAGCTTTTCCTCGAATAAATAATATAAGATTTTGATTATTACCCCCTTCATTAACTTTATTAATTTCTAGAAGAATTGTAGAAAATGGAGCAGGAACAGGATGAACAGTTTATCCCCCTTTATCATCTAATATCGCTCATAGAGGTAGTTCAGTTGATTTAGCTATTTTTTCTTTACATTTAGCGGGGATTTCATCAATCTTAGGAGCTATTAATTTTATTACAACTATTATTAATATACGAATTAATCATATATCATTTGATCAAATACCTCTCTTTGTATGAGCAGTAGGAATTACTGCTTTACTTTTATTATTATCTTTACCTGTATTAGCTGGTGCTATTACTATATTATTAACAGATCGAAATCTTAATACTTCATTTTTTGATCCTGCAGGAGGTGGAGATCCTATTTTATATCAACATTTA

LOWAM074_Kyrgyzstan_Naryntoo ACACTATATTTTATTTTTGGTATTTGAGCAGGTATAGTAGGAACCTCTTTAAGATTATTAATTCGTACTGAATTAGGTAATCCTGGATCTTTAATTGGAGATGATCAAATTTATAATACTATTGTAACAGCTCATGCTTTTATTATAATTTTTTTTATAGTTATACCAATTATAATTGGAGGATTTGGAAATTGATTAATTCCTTTAATATTAGGGGCCCCAGATATAGCTTTTCCTCGAATAAATAATATAAGATTTTGATTATTACCCCCTTCATTAACTTTATTAATTTCTAGAAGAATTGTAGAAAATGGAGCAGGAACAGGATGAACAGTTTATCCCCCTTTATCATCTAATATCGCTCATAGAGGTAGTTCAGTTGATTTAGCTATTTTTTCTTTACATTTAGCGGGAATTTCATCAATCTTAGGAGCTATTAATTTTATTACAACTATTATTAATATACGAATTAATCATATATCATTTGATCAAATACCTCTCTTTGTATGAGCAGTAGGAATTACTGCTTTACTTTTATTACTATCTTTACCTGTATTAGCTGGTGCTATTACTATATTATTAACAGATCGAAATCTTAATACTTCATTTTTTGATCCTGCAGGAGGTGGAGATCCTATTTTATATCAACATTTA

LOWAM086_Turkmenistan_3 ACATTATATTTTATTTTTGGTATTTGAGCAGGTATAGTAGGAACTTCCTTAAGATTATTAATTCGTACTGAATTAGGTAATCCTGGATCTTTAATTGGAGATGATCAAATTTATAATACTATTGTAACAGCTCATGCTTTTATTATAATTTTTTTTATAGTTATACCAATTATAATTGGAGGATTTGGAAATTGATTAATTCCTTTAATATTAGGAGCCCCAGATATAGCTTTCCCCCGAATAAATAATATAAGATTTTGATTATTACCCCCCTCATTAACTTTATTAATTTCTAGAAGAATTGTAGAAAATGGAGCAGGAACTGGATGAACAGTTTATCCCCCTTTATCATCTAATATTGCCCATAGAGGTAGTTCAGTTGATTTAGCTATCTTTTCTTTACATTTAGCAGGAATTTCATCAATTTTAGGAGCTATTAATTTTATTACAACTATTATTAATATACGAATTAATCATATATCATTTGATCAAATACCTCTTTTTGTATGAGCAGTAGGAATTACTGCTTTACTTTTATTACTATCTTTACCTGTATTAGCTGGTGCTATTACTATATTATTAACAGATCGAAATCTTAATACCTCATTTTTTGATCCAGCAGGAGGTGGAGATCCTATTTTATATCAACATTTA

LOWAM087_Uzbekistan_Sarchashma ACACTATATTTTATTTTTGGTATTTGAGCAGGTATAGTAGGAACCTCTTTAAGATTATTAATTCGTACTGAATTAGGTAATCCTGGATCTTTAATTGGAGATGATCAAATTTATAATACTATTGTAACAGCTCATGCTTTTATTATAATTTTTTTCATAGTTATACCAATTATAATTGGAGGATTTGGAAATTGATTAATTCCTTTAATATTAGGAGCCCCAGATATAGCTTTTCCTCGAATAAATAATATAAGATTTTGATTACTACCCCCTTCATTAACTTTATTAATTTCCAGAAGAATTGTAGAAAATGGAGCAGGAACAGGATGAACAGTTTATCCCCCTTTATCATCTAATATCGCTCATAGAGGTAGTTCAGTTGATTTAGCTATTTTTTCTTTACATTTAGCAGGAATTTCATCAATTTTAGGAGCTATTAATTTCATTACAACTATTATTAATATACGAATTAACCATATATCATTTGATCAAATACCCCTCTTTGTATGAGCAGTAGGAATTACTGCTTTACTTTTATTATTATCTTTACCTGTATTAGCTGGTGCTATTACTATATTATTAACAGATCGAAATCTTAATACTTCATTTTTTGATCCTGCAGGAGGTGGAGATCCTATTTA??ATCAACATTTA

LOWAM095_Kyrgyzstan_Sosnovka ACACTATATTTTATTTTTGGTATTTGAGCAGGTATAGTAGGAACCTCTTTAAGATTATTAATTCGTACTGAATTAGGTAATCCTGGATCTTTAATTGGAGATGATCAAATTTATAATACTATTGTAACAGCTCATGCTTTTATTATAATTTTTTTTATAGTTATACCAATTATAATTGGAGGATTTGGAAATTGATTAATTCCTTTAATATTAGGGGCTCCAGATATAGCTTTTCCTCGAATAAATAATATAAGATTTTGATTATTACCCCCTTCATTAACTTTATTAATTTCTAGAAGAATTGTAGAAAATGGAGCAGGAACAGGATGAACAGTTTATCCCCCTTTATCATCTAATATCGCTCATAGAGGTAGTTCAGTTGATTTAGCTATTTTTTCTTTACATTTAGCGGGAATTTCATCAATCTTAGGAGCTATTAATTTTATTACAACTATTATTAATATACGAATTAATCATATATCATTTGATCAAATACCTCTCTTTGTATGAGCAGTAGGAATTACTGCTTTACTTTTATTACTATCTTTACCTGTATTAGCTGGTGCTATTACTATATTATTAACAGATCGAAATCTTAATACTTCATTTTTTGATCCTGCAGGAGGTGGAGATCCTATTTTATATCAACATTTA

LOWAM096_Gissar_5 ACACTATATTTTATTTTTGGTATTTGAGCAGGTATAGTAGGAACCTCTTTAAGATTATTAATTCGTACTGAATTAGGTAATCCTGGATCTTTAATTGGAGATGATCAAATTTATAATACTATTGTAACAGCTCATGCTTTTATTATAATTTTTTTCATAGTTATACCAATTATAATTGGAGGATTTGGAAATTGATTAATTCCTTTAATATTAGGAGCCCCAGATATAGCTTTTCCTCGAATAAATAATATAAGATTTTGATTACTACCCCCTTCATTAACTTTATTAATTTCCAGAAGAATTGTAGAAAATGGAGCAGGAACAGGATGAACAGTTTATCCCCCTTTATCGTCTAATATCGCTCATAGAGGTAGTTCAGTTGATTTAGCTATTTTTTCTTTACATTTAGCAGGAATTTCATCAATTTTAGGAGCTATTAATTTCATTACAACTATTATTAATATACGAATTAACCATATATCATTTGATCAAATACCCCTCTTTGTATGAGCAGTAGGAATTACTGCTTTACTTTTATTATTATCTTTACCTGTATTAGCTGGTGCTATTACTATATTATTAACAGATCGAAATCTTAATACTTCATTTTTTGATCCTGCAGGAGGTGGAGATCCTATTTTATATCAACATTTA

LOWAM098_Tajikistan_Khondiza1 ACACTATATTTTATTTTTGGTATTTGAGCAGGTATAATAGGAACCTCTTTAAGATTATTAATTCGTACTGAATTAGGTAATCCTGGATCTTTAATTGGAGATGATCAAATTTATAATACTATTGTAACAGCTCATGCTTTTATTATAATTTTTTTCATAGTTATACCAATTATAATTGGAGGATTTGGAAATTGATTAATTCCTTTAATATTAGGAGCCCCAGATATAGCTTTTCCTCGAATAAATAATATAAGATTTTGATTACTACCCCCTTCATTAACTTTATTAATTTCCAGAAGAATTGTAGAAAATGGAGCAGGAACAGGATGAACAGTTTATCCCCCTTTATCGTCTAATATCGCTCATAGAGGTAGTTCAGTTGATTTAGCTATTTTTTCTTTACATTTAGCAGGAATTTCATCAATTTTAGGAGCTATTAATTTCATTACAACTATTATTAATATACGAATTAACCATATATCATTTGATCAAATACCCCTCTTTGTATGAGCAGTAGGAATTACTGCTTTACTTTTATTATTATCTTTACCTGTATTAGCTGGTGCTATTACTATATTATTAACAGATCGAAATCTTAATACTTCATTTTTTGATCCTGCAGGAGGTGGAGATCCTATTTTATATCAACATTTA

LOWAM099_Uzbekistan_Kamchik_2 ACACTATATTTTATTTTTGGTATTTGAGCAGGTATAGTAGGAACCTCTTTAAGATTATTAATTCGTACTGAATTAGGTAATCCTGGATCTTTAATTGGAGATGATCAAATTTATAATACTATTGTAACAGCTCATGCTTTTATTATAATTTTTTTTATAGTTATACCAATTATAATTGGAGGATTTGGAAATTGATTAATTCCTTTAATATTAGGGGCCCCAGATATAGCTTTTCCTCGAATAAATAATATAAGATTTTGATTATTACCCCCTTCATTAACTTTATTAATTTCTAGAAGAATTGTAGAAAATGGAGCAGGAACAGGATGAACAGTTTATCCCCCTTTATCATCTAATATCGCTCATAGAGGTAGTTCAGTTGATTTAGCTATTTTTTCTTTACATTTAGCAGGAATTTCATCAATTTTAGGAGCTATTAATTTTATTACAACTATTATTAATATACGAATTAATCATATATCATTTGATCAAATACCTCTCTTTGTATGAGCAGTAGGAATTACTGCTTTACTTTTATTACTATCTTTACCTGTATTAGCTGGTGCTATTACTATATTATTAACAGATCGAAATCTTAATACTTCATTTTTTGATCCTGCAGGAGGTGGAGATCCTATTTTATATCAACATTTA

LOWAM100_Kyrgyzstan_Konduk ACACTATATTTTATTTTTGGTATTTGAGCAGGTATAGTAGGAACCTCTTTAAGATTATTAATTCGTACTGAATTAGGTAATCCTGGATCTTTAATTGGAGATGATCAAATTTATAATACTATTGTAACAGCTCATGCTTTTATTATAATTTTTTTTATAGTTATACCAATTATAATTGGAGGATTTGGAAATTGATTAATTCCTTTAATATTAGGGGCCCCAGATATAGCTTTTCCTCGAATAAATAATATAAGATTTTGATTATTACCCCCTTCATTAACTTTATTAATTTCTAGAAGAATTGTAGAAAATGGAGCAGGAACAGGATGAACAGTTTATCCCCCTTTATCATCTAATATCGCTCATAGAGGTAGTTCAGTTGATTTAGCTATTTTTTCTTTACATTTAGCGGGAATTTCATCAATCTTAGGAGCTATTAATTTTATTACAACTATTATTAATATACGAATTAATCATATATCATTTGATCAAATACCTCTCTTTGTATGAGCAGTAGGAATTACTGCTTTACTTTTATTACTATCTTTACCTGTATTAGCTGGTGCTATTACTATATTATTAACAGATCGAAATCTTAATACTTCATTTTTTGATCCTGCAGGAGGTGGAGATCCTATTTTATATCAACATTTA

LOWAM115_Azerbaijan_Nyus_Nyus ACACTATATTTTATTTTCGGTATTTGAGCAGGTATAGTAGGAACCTCTTTAAGATTATTAATTCGTACTGAATTAGGTAATCCCGGATCTTTAATTGGAGATGATCAAATTTATAACACTATTGTAACAGCTCATGCTTTTATTATAATTTTTTTTATAGTTATACCAATTATAATTGGAGGATTTGGAAATTGATTAATTCCTTTAATATTAGGAGCTCCAGATATAGCTTTTCCTCGAATAAATAATATAAGATTTTGATTACTCCCCCCCTCATTAACTTTATTAATTTCTAGAAGAATTGTAGAAAATGGAGCAGGAACAGGATGAACAATTTATCCCCCTTTATCATCTAATATTGCTCATAGAGGTAGTTCAGTTGATTTAGCTATTTTTTCTTTACATTTAGCAGGAATTTCATCAATCTTAGGAGCTATTAATTTTATTACAACTATTATTAACATACGAATTAATCATATATCATTTGATCAAATACCCCTTTTTGTATGAGCAGTAGGAATTACTGCATTACTTTTATTATTATCTTTACCTGTATTAGCTGGTGCTATTACTATATTATTAACAGATCGAAATCTTAATACTTCATTTTTTGATCCTGCAGGAGGTGGAGATCCTATTTTATATCAACACTTA

LOWAM116_Iran_Dizin_2 ACACTATATTTTATTTTCGGTATTTGAGCAGGTATAGTAGGAACCTCTTTAAGATTATTAATTCGTACTGAATTAGGTAATCCTGGATCTTTAATTGGAGATGATCAAATTTATAACACTATTGTAACAGCTCATGCTTTTATTATAATTTTTTTTATAGTTATACCAATTATAATTGGAGGATTTGGAAATTGATTAATTCCTTTAATATTAGGAGCTCCAGATATAGCTTTTCCTCGAATAAATAATATAAGATTTTGATTACTCCCCCCCTCATTAACTTTATTAATTTCTAGAAGAATTGTAGAAAATGGAGCAGGAACAGGATGAACAATTTATCCCCCTTTATCATCTAATATTGCTCATAGAGGTAGTTCAGTTGATTTAGCTATTTTTTCTTTACATTTAGCAGGAATTTCATCAATCTTAGGAGCTATTAATTTTATTACAACTATTATTAACATACGAATTAATCATATATCATTTGATCAAATACCCCTTTTTGTATGAGCAGTAGGAATTACTGCATTACTTTTATTATTATCTTTACCTGTATTAGCTGGTGCTATTACTATATTATTAACAGATCGAAATCTTAATACTTCATTTTTTGATCCTGCAGGAGGTGGAGATCCTATTTTATATCAACACTTA

LOWAM122_Russia_Saratow_1 ACACTATATTTTATTTTTGGTATTTGAGCAGGTATAGTAGGAACCTCTTTAAGATTATTAATTCGTACTGAATTAGGTAATCCTGGATCTTTAATTGGAGATGATCAAATTTATAACACTATTGTAACAGCTCATGCTTTTATTATAATTTTTTTTATAGTTATACCAATTATAATTGGAGGATTTGGAAATTGATTAATTCCTTTAATATTAGGAGCCCCAGATATAGCTTTTCCTCGAATAAATAATATAAGATTTTGATTACTACCCCCCTCATTAACTTTATTAATTTCTAGAAGAATTGTAGAAAATGGAGCAGGAACAGGATGAACAGTTTATCCCCCTTTATCATCTAATATCGCTCATAGAGGTAGTTCAGTTGATTTAGCTATTTTTTCTTTACATTTAGCAGGAATTTCATCAATCTTAGGAGCTATTAATTTTATTACAACTATTATTAATATACGAATTAACCATATATCATTTGATCAAATACCTCTCTTTGTATGAGCAGTAGGAATTACTGCTTTACTTTTATTATTATCTTTACCTGTATTAGCTGGTGCTATTACTATATTATTAACAGATCGAAATCTTAATACTTCATTTTTTGATCCTGCAGGAGGTGGGGATCCTATTTTATATCAACATTTA

LOWAM136_Uzbekistan_Tamshush_1 ACACTATATTTTATTTTTGGTATTTGAGCAGGTATAGTAGGAACCTCTTTAAGATTATTAATTCGTACTGAATTAGGTAATCCTGGATCTTTAATTGGAGATGATCAAATTTATAATACTATTGTAACAGCTCATGCTTTTATTATAATTTTTTTCATAGTTATACCAATTATAATTGGAGGATTTGGAAATTGATTAATTCCTTTAATATTAGGAGCCCCAGATATAGCTTTTCCTCGAATAAATAATATAAGATTTTGATTACTACCCCCTTCATTAACTTTATTAATTTCCAGAAGAATTGTAGAAAATGGAGCAGGAACAGGATGAACAGTTTATCCCCCTTTATCATCTAATATCGCTCATAGAGGTAGTTCAGTTGATTTAGCTATTTTTTCTTTACATTTAGCAGGAATTTCATCAATTTTAGGAGCTATTAATTTCATTACAACTATTATTAATATACGAATTAACCATATATCATTTGATCAAATACCCCTCTTTGTATGAGCAATAGGAATTACTGCTTTACTTTTATTATTATCTTTACCTGTATTAGCTGGTGCTATTACTATATTATTAACAGATCGAAATCTTAATACTTCATTTTTTGATCCTGCAGGAGGTGGAGATCCTATTTTATATCAACATTTA

LOWAM149_Kyrgyzstan_Songkel_1 ACACTATATTTTATTTTTGGTATTTGAGCAGGTATAGTAGGAACCTCTTTAAGATTATTAATTCGTACTGAATTAGGTAATCCTGGATCTTTAATTGGAGATGATCAAATTTATAATACTATTGTAACAGCTCATGCTTTTATTATAATTTTTTTTATAGTTATACCAATTATAATTGGAGGATTTGGAAATTGATTAATTCCTTTAATATTAGGGGCCCCAGATATAGCTTTTCCTCGAATAAATAATATAAGATTTTGATTATTACCCCCCTCATTAACTTTATTAATTTCTAGAAGAATTGTAGAAAATGGAGCAGGAACAGGATGAACAGTTTATCCCCCTTTATCATCTAATATTGCTCATAGAGGTAGTTCAGTTGATTTAGCTATTTTTTCTTTACATTTAGCGGGAATTTCATCAATCTTAGGAGCTATTAATTTTATTACAACTATTATTAATATACGAATTAATCATATATCATTTGATCAAATACCTCTCTTTGTATGAGCAGTAGGAATTACTGCTTTACTTTTATTACTATCTTTACCTGTATTAGCTGGTGCTATTACTATATTATTAACAGATCGAAATCTTAATACTTCATTTTTTGATCCTGCAGGAGGTGGAGATCCTATTTTATATCAACATTTA

LOWAM198_Turkey_Aladaglar_2 ACACTATATTTTATTTTTGGTATTTGAGCAGGTATAGTAGGAACCTCTTTAAGATTATTAATTCGTACTGAATTAGGTAATCCTGGATCTTTAATTAGAGATGATCAAATTTATAATACTATTGTAACAGCTCATGCTTTTATTATAATTTTTTTTATAGTTATACCAATTATAATTGGAGGATTTGGAAATTGATTAATTCCTTTAATATTAGGAGCTCCAGATATAGCTTTTCCTCGAATAAATAATATAAGATTTTGATTACTTCCCCCTTCATTAACTTTATTAATTTCTAGAAGAATTGTAGAAAATGGAGCAGGAACAGGATGAACAGTTTATCCCCCTTTATCATCTAATATTGCTCATAGAGGTAGTTCAGTTGATTTAGCTATTTTTTCTTTACATTTAGCAGGAATTTCATCAATCTTAGGAGCTATTAATTTTATTACAACTATTATTAATATA---------------------------------------------------------------------------------------------------------------------------------------------------------------------------------------------

LOWAM213_Tajikistan_Tandukul_1 ACACTATATTTTATTTTTGGTATTTGAGCAGGTATAGTAGGAACCTCTTTAAGATTATTAATTCGTACTGAATTAGGTAATCCTGGATCTTTAATTGGAGATGATCAAATTTATAATACTATTGTAACAGCTCATGCTTTTATTATAATTTTTTTCATAGTTATACCAATTATAATTGGAGGATTTGGAAATTGATTAATTCCTTTAATATTAGGAGCCCCAGATATAGCTTTTTCTCGAATAAATAATATAAGATTTTGATTACTACCCCCTTCATTAACTTTATTAATTTCTAGAAGAATTGTAGAAAATGGAGCAGGAACAGGATGAACAGTTTATCCCCCTTTATTATCTAATATCGCTCATAGAGGTAGTTCAGTTGATTTAGCTATTTTTTCTTTACATTTAGCAGGAATTTCATCAATTTTAGGAGCTATTAATTTCATTACAACTATTATTAATATACGAATTAACCATATATCATTTGATCAAATACCCCTCTTTGTATGAGCAGTAGGAATTACTGCGTTACTTTTATTATTATCTTTACCTGTATTAGCTGGTGCTATTACTATATTATTAACAGATCGAAATCTTAATACTTCATTTTTTGATCCTGCAGGAGGTGGAGATCCTATTTTATATCAACATTTA

Parnassius_clodius ACATTATATTTTATTTTTGGTATTTGAGCAGGTATAGTAGGAACCTCTTTAAGATTATTAATTCGTACTGAATTAGGTAATCCTGGATCTTTAATTGGAGATGATCAAATTTATAATACTATTGTAACAGCTCATGCTTTTATCATAATTTTTTTCATAGTTATACCAATTATAATTGGAGGATTTGGAAATTGATTAATTCCATTAATATTAGGAGCTCCAGATATAGCTTTTCCTCGAATAAATAATATAAGATTTTGATTATTACCCCCTTCATTAACTTTATTAATTTCTAGAAGAATTGTACAAAATGGAGCAGGAACTGGATGAACAGTTTATCCCCCTTTATCATCTAATATTGCTCATAGAGGAAGATCAGTTGATTTAGCTATTTTTTCTTTACATTTAGCTGGAATTTCATCTATCTTAGGAGCTATTAATTTTATTACAACTATTATTAATATACGAATTAATCATATATCATTTGATCAAATACCCCTTTTTGTATGAGCAGTAGGAATTACCGCTTTACTTCTATTATTATCTTTACCTGTTTTAGCAGGTGCTATTACCATATTATTAACAGATCGAAATCTTAATACTTCATTTTTTGATCCAGCAGGAGGTGGAGATCCTATTTTATATCAACACTTA

Parnassius_eversmanni_2005_LOWA_108 ---------------------ATTTGAGCAGGTATAGTAGGAACCTCTTTAAGATTATTAATTCGTTCTGAATTAGGTAATCCTGGATCTTTAATTGGAGATGATCAAATTTATAATACTATTGTAACAGCTCATGCTTTTATTATAATTTTTTTTATAGTTATACCAATTATAATTGGAGGATTTGGAAATTGATTAATTCCATTAATATTAGGAGCTCCAGATATAGCTTTTCCTCGAATAAATAATATAAGATTTTGATTATTACCCCCCTCATTAACCTTACTAATTTCTAGAAGAATTGTAGAAAATGGAGCAGGAACTGGATGAACGGTTTATCCCCCTTTATCATCTAATATTGCTCATAGAGGAAGATCAGTTGATTTAGCTATCTTTTCTTTACATTTAGCTGGAATTTCATCTATCTTAGGAGCTATTAATTTTATTACAACTATTATTAATATACGAATTAATCATATATCATTTGATCAAATACCCCTTTTTGTATGAGCAGTAGGAATTACTGCTTTACTTTTATTATTATCTTTACCTGTTTTAGCAGGTGCTATTACCATATTATTAACAGATCGAAATCTTAATACTTCATTTTTTGACCCAGCAGGAGGTGGAGATCCTATTTTATATCAACATTTA

Parnassius_eversmanni_2005_LOWA_107 ---------------------ATTTGAGCAGGTATAGTAGGAACCTCTTTAAGATTATTAATTCGTTCTGAATTAGGTAATCCTGGATCTTTAATTGGAGATGATCAAATTTATAATACTATTGTAACAGCTCATGCTTTTATTATAATTTTTTTTATAGTTATACCAATTATAATTGGAGGATTTGGAAATTGATTAATTCCATTAATATTAGGAGCTCCAGATATAGCTTTTCCTCGAATAAATAATATAAGATTTTGATTATTACCCCCCTCATTAACCTTACTAATTTCTAGAAGAATTGTAGAAAATGGAGCAGGAACTGGATGAACGGTTTATCCCCCTTTATCATCTAATATTGCTCATAGAGGAAGATCAGTTGATTTAGCTATCTTTTCTTTACATTTAGCTGGAATTTCATCTATCTTAGGAGCTATTAATTTTATTACAACTATTATTAATATACGAATTAATCATATATCATTTGATCAAATACCCCTTTTTGTATGAGCAGTAGGAATTACTGCTTTACTTTTATTATTATCTTTACCTGTTTTAGCAGGTGCTATTACCATATTATTAACAGATCGAAATCTTAATACTTCATTTTTTGACCCAGCAGGAGGTGGAGATCCTATTTTATATCAACATTTA

Parnassius_stubbendorfii_2005_LOWA_815 ACATTATATTTTATTTTTGGTATTTGAGCAGGTATAGTAGGAACTTCTTTAAGATTATTAATTCGTACTGAATTAGGTAATCCTGGATCTTTAATTGGAGATGATCAAATTTATAATACTATTGTAACAGCTCATGCTTTTATTATAATTTTTTTTATAGTTATACCAATTATAATTGGAGGATTTGGAAATTGATTAATTCCTTTAATATTAGGAGCCCCAGATATAGCTTTTCCTCGAATAAATAATATAAGATTTTGATTATTACCCCCTTCATTAACTTTACTAATTTCCAGAAGAATTGTAGAAAATGGGGCAGGAACTGGATGAACAGTCTACCCTCCTTTATCATCTAATATTGCTCACGGAGGAAGATCTGTTGATTTAGCTATTTTTTCCTTACATTTAGCGGGAATTTCATCTATTTTAGGAGCCATTAATTTTATTACAACTATTATTAATATACGAATTAATCATATATCATTTGATCAAATACCTCTTTTTGTATGAGCAGTAGGAATTACTGCTTTACTTTTATTATTATCTCTACCTGTTTTAGCAGGTGCTATTACTATATTATTAACAGATCGAAATCTTAATACTTCATTTTTTGACCCAGCAGGAGGTGGAGATCCTATTTTATATCAACACTTA

Parnassius_stubbendorfii_2005_LOWA_154 ACATTATATTTTATTTTTGGTATTTGAGCAGGTATAGTAGGAACTTCTTTAAGATTATTAATTCGTACTGAATTAGGTAATCCTGGATCTTTAATTGGAGATGATCAAATTTATAATACTATTGTAACAGCTCATGCTTTTATTATAATTTTTTTTATAGTTATACCAATTATAATTGGAGGATTTGGAAATTGATTAATTCCTTTAATATTAGGAGCCCCAGATATAGCTTTTCCTCGAATAAATAATATAAGATTTTGATTATTACCCCCTTCATTAACTTTACTAATTTCCAGAAGAATTGTAGAAAATGGAGCAGGAACTGGATGAACAGTCTACCCTCCTTTATCATCTAATATTGCTCACGGAGGAAGATCTGTTGATTTAGCTATTTTTTCCTTACATTTAGCGGGAATTTCATCTATTTTAGGAGCCATTAATTTTATTACAACTATTATTAATATACGAATTAATCATATATCATTTGATCAAATACCTCTTTTTGTATGAGCAGTAGGAATTACTGCTTTACTTTTATTATTATCTCTACCTGTTTTAGCAGGTGCTATTACTATATTATTAACAGATCGAAATCTTAATACTTCATTTTTTGACCCAGCAGGAGGTGGAGATCCTATTTTATATCAACACTTA

Parnassius_stubbendorfii_2005_LOWA_153 -CATTATATTTTATTTTTGGTATTTGAGCAGGTATAGTAGGAACTTCTTTAAGATTATTAATTCGTACTGAATTAGGTAATCCTGGATCTTTAATTGGAGATGATCAAATTTATAATACTATTGTAACAGCTCATGCTTTTATTATAATTTTTTTTATAGTTATACCAATTATAATTGGAGGATTTGGAAATTGATTAATTCCTTTAATATTAGGAGCCCCAGATATAGCTTTTCCTCGAATAAATAATATAAGATTTTGATTATTACCCCCTTCATTAACTTTACTAATTTCCAGAAGAATTGTAGAAAATGGAGCAGGAACTGGATGAACAGTCTACCCTCCTTTATCATCTAATATTGCTCACGGAGGAAGATCTGTTGATTTAGCTATTTTTTCCTTACATTTAGCGGGAATTTCATCTATTTTAGGAGCCATTAATTTTATTACAACTATTATTAATATACGAATTAATCATATATCATTTGATCAAATACCTCTTTTTGTATGAGCAGTAGGAATTACTGCTTTACTTTTATTATTATCTCTACCTGTTTTAGCAGGTGCTATTACTATATTATTAACAGATCGAAATCTTAATACTTCATTTTTTGACCCAGCAGGAGGTGGAGATCCTATTTTATATCAACACTTA

Parnassius_nordmanni ACATTATATTTTATTTTTGGTATTTGAGCAGGTATAGTAGGAACTTCTTTAAGATTATTAATTCGTACTGAATTAGGTAATCCTGGATCTCTAATTGGAGATGATCAAATTTACAATACTATCGTAACAGCTCATGCTTTTATTATAATTTTTTTCATAGTTATACCAATTATAATTGGAGGATTTGGAAATTGATTAATTCCATTAATATTAGGAGCTCCAGATATAGCTTTCCCCCGAATAAATAATATAAGATTTTGATTATTACCCCCCTCATTAACTCTATTAATTTCTAGAAGAATTGTAGAAAATGGGGCAGGAACTGGATGAACAGTTTACCCCCCTTTATCATCTAATATTGCTCATAGAGGAAGATCAGTTGACTTAGCTATTTTTTCTTTACATTTGGCTGGGATTTCTTCTATTTTAGGAGCTATTAATTTTATCACAACTATTGTTAATATACGAATTAACTATATATCATTTGATCAAATACCTCTTTTCGTATGAGCAGTAGGAATTACTGCTTTACTTTTATTATTATCTTTACCTGTTTTAGCAGGTGCTATTACTATATTATTAACAGATCGAAATCTTAATACTTCATTTTTTGATCCAGCAGGAGG?GGAGACCCTATTCTATATCAA------

Parnassius_eversmanni ACATTATATTTTATTTTTGGTATTTGAGCAGGTATAGTAGGAACCTCTTTAAGATTATTAATTCGTTCTGAATTAGGTAATCCTGGATCTTTAATTGGAGATGATCAAATTTATAATACTATTGTAACAGCTCATGCTTTTATTATAATTTTTTTTATAGTTATACCAATTATAATTGGAGGATTTGGAAATTGATTAATTCCATTAATATTAGGAGCTCCAGATATAGCTTTTCCTCGAATAAATAATATAAGATTTTGATTATTACCCCCCTCATTAACCTTACTAATTTCTAGAAGAATTGTAGAAAATGGAGCAGGAACTGGATGAACGGTTTATCCCCCTTTATCATCTAATATTGCTCATAGAGGAAGATCAGTTGATTTAGCTATCTTTTCTTTACATTTAGCTGGAATTTCATCTATCTTAGGAGCTATTAATTTTATTACAACTATTATTAATATACGAATTAATCATATATCATTTGATCAAATACCCCTTTTTGTATGAGCAGTAGGAATTACTGCTTTACTTTTATTATTATCTTTACCTGTTTTAGCAGGTGCTATTACCATATTATTAACAGATCGAAATCTTAATACTTCATTTTTTGACCCAGCAGGAGGTGGAGATCCTATTTTATATCAA------

Parnassius_eversmanni_felderi ACATTATATTTTATTTTTGGTATTTGAGCAGGTATAGTAGGAACCTCTTTAAGATTATTAATTCGTTCTGAATTAGGTAATCCTGGATCTTTAATTGGAGATGATCAAATTTATAATACTATTGTAACAGCTCATGCTTTTATTATAATTTTTTTTATAGTTATACCAATTATAATTGGAGGATTTGGAAATTGATTAATTCCATTAATATTAGGAGCTCCAGATATAGCTTTTCCTCGAATAAATAATATAAGATTTTGATTATTACCCCCCTCATTAACCTTACTAATTTCTAGAAGAATTGTAGAAAATGGAGCAGGAACTGGATGAACGGTTTATCCCCCTTTATCATCTAATATTGCTCATAGAGGAAGATCAGTTGATTTAGCTATCTTTTCTTTACA?TTAGCTGGAATTTCATCTATCTTAGGAGCTATTAATTTTATTACAACTATTATTAATATACGAATTAATCATATATCATTTGATCAAATACCCCTTTTTGTATGAGCAGTAGGAATTACTGCTTTACTTTTATTATTATCTTTACCTGTTTTAGCAGGTGCTATTACCATATTATTAACAGATCGAAATCTTAATACTTCATTTTTTGACCCAGCAGGAGGTGGAGATCCTATTTTATATCAA------

Parnassius_ariadne_ariadne ACATTATATTTTATTTTTGGTATTTGAGCAGGTATAGTAGGAACCTCTTTAAGATTATTAATTCGTACTGAATTAGGTAATCCTGGATCTTTAATTGGAGATGATCAAATTTATAATACTATCGTAACAGCTCATGCTTTTATTATAATTTTTTTTATAGTTATACCAATTATAATTGGAGGATTTGGAAATTGATTAATTCCTTTAATATTAGGAGCTCCAGATATAGCCTTTCCTCGAATAAATAATATAAGATTTTGATTACTACCCCCCTCATTAACTTTATTAATCTCTAGAAGAATTGTAGAAAATGGAGCAGGAACTGGATGAACAGTTTATCCCCCTTTATCATCTAATATTGCTCATAGAGGAAGTTCAGTTGATTTAGCCATTTTCTCTTTACATTTAGCAGGAATTTCATCAATTTTAGGAGCTATTAATTTTATCACAACTATTATTAATATACGAATTAATCATATATCATTTGATCAAATACCCCTTTTTGTTTGAGCAGTAGGAATTACTGCTTTACTATTATTATTATCTTTACCTGTATTAGCTGGTGCTATTACTATATTATTAACAGATCGAAATCTTAATACTTCATTTTTTGATCCAGCAGGA????GAGATCCTATTTTATATCAA------

Parnassius_glacialis_mikado ACATTATATTTTATTTTTGGTATTTGAGCAGGTATAGTAGGAACCTCCTTAAGATTATTAATTCGTACTGAATTAGGTAATCCTGGATCTTTAATTGGAGATGATCAAATTTATAATACTATTGTAACAGCTCATGCTTTTATTATAATTTTTTTTATAGTTATACCAATTATAATTGGAGGATTTGGAAATTGATTAATCCCTTTAATATTAGGAGCTCCAGATATAGCTTTCCCCCGAATAAATAATATAAGATTTTGATTATTACCCCCCTCATTAACTTTACTAATTTCCAGAAGAATTGTAGAAAATGGAGCAGGAACAGGATGAACAGTTTATCCCCCATTATCCTCTAATATTGCCCACAGAGGAAGATCTGTTGATTTAGCTATTTTTTCTTTACATTTAGCAGGAATTTCATCTATTCTAGGAGCTATTAATTTTATTACAACTATTATTAATATACGAATTAATCATATATCATTTGATCAAATACCTCTCTTTGTTTGAGCAGTAGGAATTACTGCTTTACTTTTATTATTATCCCTACCTGTTTTAGCAGGTGCTATTACTATATTATTAACAGATCGAAATCTTAATACTTCTTTTTTTGACCCAGCAGGAGGTGGAGATCCAATTTTATATCAA------

Parnassius_stubbendorfii_hoenei ACATTATATTTTATTTTTGGTATTTGAGCAGGAATAGTAGGAACCTCCCTAAGATTATTAATTCGTACTGAATTAGGTAATCCCGGATCTTTAATTGGAGATGATCAAATTTACAATACTATTGTAACAGCTCATGCTTTCATTATAATTTTTTTTATAGTTATACCAATTATAATTGGAGGATTTGGAAATTGACTGATTCCTTTAATATTAGGAGCCCCAGATATAGCTTTCCCCCGAATAAATAATATAAGATTTTGATTACTACCCCCCTCATTAACTTTATTAATTTCTAGAAGAATTGTAGAAAATGGAGCAGGAACTGGATGAACAGTCTATCCCCCTTTATCATCTAATATTGCCCATAGAGGAAGATCCGTTGATTTAGCTATTTTTTCCTTACATTTAGCAGGAATTTCATCTATTTTAGGAGCCATTAATTTTATTACAACTATTATTAATATACGAATTAATCATATATCATTTGATCAAATACCTCTTTTTGTATGAGCAGTAGGAATTACTGCTTTACTTTTATTATTATCTTTACCTGTTTTAGCAGGTGCTATTACTATATTATTAACAGATCGAAATCTTAATACTTCCTTTTTTGACCCAGCAGGAGGTGGAGATCCTATTTTATACCAA------

Parnassius_stubbendorfii_hoenei_AC20_16 ------------------------TGAGCAGGAATAGTAGGAACCTCCCTAAGATTATTAATTCGTACTGAATTAGGTAATCCCGGATCTTTAATTGGAGATGATCAAATTTACAATACTATTGTAACAGCTCATGCTTTCATTATAATTTTTTTTATAGTTATACCAATTATAATTGGAGGATTTGGAAATTGACTGATTCCTTTAATATTAGGAGCCCCAGATATAGCTTTCCCCCGAATAAATAATATAAGATTTTGATTACTACCCCCCTCATTAACTTTATTAATTTCTAGAAGAATTGTAGAAAATGGAGCAGGAACTGGATGAACAGTCTATCCCCCTTTATCATCTAATATTGCCCATAGAGGAAGATCCGTTGATTTAGCTATTTTTTCCTTACATTTAGCAGGAATTTCATCTATTTTAGGAGCCATTAATTTTATTACAACTATTATTAATATACGAATTAATCATATATCATTTGATCAAATACCTCTTTTTGTATGAGCAGTAGGAATTACTGCTTTACTTTTATTATTATCTTTACCTGTTTTAGCAGGTGCTATTACTATATTATTAACAGATCGAAATCTTAATACTTCCTTTTTTGACCCCGCAGGAGGTGGAGATCCTATTTTATACCAACATTTA

Parnassius_stubbendorfii_koreanus ------------------------TGAGCAGGTATAGTAGGAACTTCTTTAAGATTATTAATTCGTACTGAATTAGGTAATCCTGGATCTTTAATTGGAGATGATCAAATTTATAATACTATTGTAACAGCTCATGCTTTTATTATAATTTTTTTTATAGTTATACCAATTATAATTGGAGGATTTGGAAATTGATTAATTCCTTTAATATTAGGAGCCCCAGATATAGCTTTTCCTCGAATAAATAATATAAGATTTTGACTATTACCCCCCTCATTAACTTTACTAATTTCCAGAAGAATTGTAGAAAATGGAGCAGGAACTGGATGAACAGTCTACCCTCCTTTATCATCTAATATTGCTCACGGAGGAAGATCTGTTGATTTAGCTATTTTTTCCTTACATTTAGCAGGAATTTCATCTATTTTAGGAGCCATTAATTTTATTACAACTATTATTAATATACGAATTAATCATATATCATTTGATCAAATACCTCTTTTTGTATGAGCAGTAGGAATTACTGCTTTACTTTTATTATTATCTCTACCTGTTTTAGCAGGTGCTATTACTATATTATTAACAGATCGAAATCTTAATACTTCATTTTTTGACCCAGCAGGAGGTGGAGATCCTATTTTATATCAACACTTA

Parnassius_nordmanni_AC20_5 ------------------------TGAGCAGGTATAGTAGGAACTTCTTTAAGATTATTAATTCGTACTGAATTAGGTAATCCTGGATCTCTAATTGGAGATGATCAAATTTACAATACTATCGTAACAGCTCATGCTTTTATTATAATTTTTTTCATAGTTATACCAATTATAATTGGAGGATTTGGAAATTGATTAATTCCATTAATATTAGGAGCTCCAGATATAGCTTTCCCCCGAATAAATAATATAAGATTTTGATTATTACCCCCCTCATTAACTCTATTAATTTCTAGAAGAATTGTAGAAAATGGGGCAGGAACTGGATGAACAGTTTACCCCCCTTTATCATCTAATATTGCTCATAGAGGAAGATCAGTTGACTTAGCTATTTTTTCTTTACATTTGGCTGGGATTTCTTCTATTTTAGGAGCTATTAATTTTATCACAACTATTGTTAATATACGAATTAACTATATATCATTTGATCAAATACCTCTTTTCGTATGAGCAGTAGGAATTACTGCTTTACTTTTATTATTATCTTTACCTGTTTTAGCAGGTGCTATTACTATATTATTAACAGATCGAAATCTTAATACTTCATTTTTTGATCCAGCAGGAGGTGGAGACCCTATTCTATATCAACATTTA

Parnassius_eversmanni_felderi_AC23_68 ------------------------TGAGCAGGTATAGTAGGAACCTCTTTAAGATTATTAATTCGTTCTGAATTAGGTAATCCTGGATCTTTAATTGGAGATGATCAAATTTATAATACTATTGTAACAGCTCATGCTTTTATTATAATTTTTTTTATAGTTATACCAATTATAATTGGAGGATTTGGAAATTGATTAATTCCATTAATATTAGGAGCTCCAGATATAGCTTTTCCTCGAATAAATAATATAAGATTTTGATTATTACCCCCCTCATTAACCTTACTAATTTCTAGAAGAATTGTAGAAAATGGAGCAGGAACTGGATGAACGGTTTATCCCCCTTTATCATCTAATATTGCTCATAGAGGAAGATCAGTTGATTTAGCTATCTTTTCTTTACATTTAGCTGGAATTTCATCTATCTTAGGAGCTATTAATTTTATTACAACTATTATTAATATACGAATTAATCATATATCATTTGATCAAATACCCCTTTTTGTATGAGCAGTAGGAATTACTGCTTTACTTTTATTATTATCTTTACCTGTTTTAGCAGGTGCTATTACCATATTATTAACAGATCGAAATCTTAATACTTCATTTTTTGACCCAGCAGGAGGTGGAGATCCTATTTTATTTCAACATTTA

Parnassius_eversmanni_eversmanni_AC1_14 ------------------------TGATCAGGTATAGTAGGAACCTCTTTAAGATTATTAATTCGTTCTGAATTAGGTAATCCTGGATCTTTAATTGGAGATGATCAAATTTATAATACTATTGTAACAGCTCATGCTTTTATTATAATTTTTTTTATAGTTATACCAATTATAATTGGAGGATTTGGAAATTGATTAATTCCATTAATATTAGGAGCTCCAGATATAGCTTTTCCTCGAATAAATAATATAAGATTTTGATTATTACCCCCCTCATTAACCTTACTAATTTCTAGAAGAATTGTAGAAAATGGAGCAGGAACTGGATGAACGGTTTATCCCCCTTTATCATCTAATATTGCTCATAGAGGAAGATCAGTTGATTTAGCTATCTTTTCTTTACATTTAGCTGGAATTTCATCTATCTTAGGAGCTATTAATTTTATTACAACTATTATTAATATACGAATTAATCATATATCATTTGATCAAATACCCCTTTTTGTATGAGCAGTAGGAATTACTGCTTTACTTTTATTATTATCTTTACCTGTTTTAGCAGGTGCTATTACCATATTATTAACAGATCGAAATCTCAATACTTCATTTTTTGACCCAGCAGGAGGTGGAGATCCTATTTTATATCAACATTTA

Parnassius_clodius_AC4_5 ------------------------TGAGCAGGAATATTAGGAACCTCTTTAAGATTATTAATTCGTACTGAATTAGGTAATCCTGGATCTTTAATTGGAGATGATCAAATTTATAATACTATTGTAACAGCTCATGCTTTTATCATAATTTTTTTCATAGTTATACCAATTATAATTGGAGGATTTGGAAATTGATTAATTCCATTAATATTAGGAGCTCCAGATATAGCTTTTCCTCGAATAAATAATATAAGATTTTGATTATTACCCCCTTCATTAACTTTATTAATTTCTAGAAGAATTGTAGAAAATGGAGCAGGAACTGGATGAACAGTTTATCCCCCTTTATCATCTAATATTGCTCATAGAGGAAGATCAGTTGATTTAGCTATTTTTTCTTTACATTTAGCTGGAATTTCATCTATCTTAGGAGCTATTAATTTTATTACAACTATTATTAATATACGAATTAATCATATATCATTTGATCAAATACCCCTTTTTGTATGAGCAGTAGGAATTACCGCTTTACTTCTATTATTATCTTTACCTGTTTTAGCAGGTGCTATTACCATATTATTAACAGATCGAAATCTTAATACTTCATTTTTTGATCCAGCAGGAGGTGGAGATCCTATTTTATATCAACACTTA

Parnassius_ariadne_AC4_14 ------------------------TGAGCAGGTATAGTAGGAACCTCTTTAAGATTATTAATTCGTACTGAATTAGGTAATCCTGGATCTTTAATTGGAGATGATCAAATTTATAATACTATCGTAACAGCTCATGCTTTTATTATAATTTTTTTTATAGTTATACCAATTATAATTGGAGGATTTGGAAATTGATTAATTCCTTTAATATTAGGAGCTCCAGATATAGCCTTTCCTCGAATAAATAATATAAGATTTTGATTACTACCCCCCTCATTAACTTTATTAATCTCTAGAAGAATTGTAGAAAATGGAGCAGGAACTGGATGAACAGTTTATCCCCCTTTATCATCTAATATTGCTCATAGAGGAAGTTCAGTTGATTTAGCCATTTTCTCTTTACATTTAGCAGGAATTTCATCAATTTTAGGAGCTATTAATTTTATCACAACTATTATTAATATACGAATTAATCATATATCATTTGATCAAATACCCCTTTTTGTTTGAGCAGTAGGAATTACTGCTTTACTATTATTATTATCTTTACCTGTATTAGCTGGTGCTATTACTATATCATTAACAGATCGAAATCTTAATACTTCATTTTTTGATCCAGCAGGAGGTGGAGATCCTATTTTATATCAACACTTA

HQ004911_RV_07_C107_Romania ACACTATATTTTATTTTTGGTATTTGAGCAGGTATAGTAGGAACCTCTTTAAGATTATTAATTCGTACTGAATTAGGTAATCCTGGATCTTTAATTGGAGATGATCAAATTTATAATACTATTGTAACAGCTCATGCTTTTATTATAATTTTTTTTATAGTTATACCAATTATAATTGGAGGATTTGGAAATTGATTAATTCCTTTAATATTAGGAGCCCCAGATATAGCTTTTCCTCGAATAAATAATATAAGATTTTGATTACTACCCCCCTCATTAACTTTATTAATTTCTAGAAGAATTGTAGAAAATGGAGCAGGAACAGGATGAACAGTTTATCCCCCTTTATCATCTAATATCGCTCATAGAGGTAGTTCAGTTGATTTAGCTATTTTTTCTTTACATTTAGCAGGAATTTCATCAATCTTAGGAGCTATTAATTTTATTACAACTATTATTAATATACGAATTAACCATATATCATTTGATCAAATACCTCTCTTTGTATGAGCAGTAGGAATTACTGCTTTACTTTTATTATTATCTTTACCTGTATTAGCTGGTGCTATTACTATATTATTAACAGATCGAAATCTTAATACTTCATTTTTTGATCCTGCAGGAGGTGGAGATCCTATTTTATATCAACATTTA

HQ004908_RV_07_D060_Romania ACACTATATTTTATTTTTGGTATTTGAGCAGGTATAGTAGGAACCTCTTTAAGATTATTAATTCGTACTGAATTAGGTAATCCTGGATCTTTAATTGGAGATGATCAAATTTATAATACTATTGTAACAGCTCATGCTTTTATTATAATTTTTTTTATAGTTATACCAATTATAATTGGAGGATTTGGAAATTGATTAATTCCTTTAATATTAGGAGCCCCAGATATAGCTTTTCCTCGAATAAATAATATAAGATTTTGATTACTACCCCCCTCATTAACTTTATTAATTTCTAGAAGAATTGTAGAAAATGGAGCAGGAACAGGATGAACAGTTTATCCCCCTTTATCATCTAATATCGCTCATAGAGGTAGTTCAGTTGATTTAGCTATTTTTTCTTTACATTTAGCAGGAATTTCATCAATCTTAGGAGCTATTAATTTTATTACAACTATTATTAATATACGAATTAACCATATATCATTTGATCAAATACCTCTCTTTGTATGAGCAGTAGGAATTACTGCTTTACTTTTATTATTATCTCTACCTGTATTAGCTGGTGCTATTACTATATTATTAACAGATCGAAATCTTAATACTTCATTTTTTGATCCTGCAGGAGGTGGAGATCCTATTTTATATCAACATTTA

HQ004907_RV_08_M274_Romania ACACTATATTTTATTTTTGGTATTTGAGCAGGTATAGTAGGAACCTCTTTAAGATTATTAATTCGTACTGAATTAGGTAATCCTGGATCTTTAATTGGAGATGATCAAATTTATAATACTATTGTAACAGCTCATGCTTTTATTATAATTTTTTTTATAGTTATACCAATTATAATTGGAGGATTTGGAAATTGATTAATTCCTTTAATATTAGGAGCCCCAGATATAGCTTTTCCTCGAATAAATAATATAAGATTTTGATTACTACCCCCCTCATTAACTTTATTAATTTCTAGAAGAATTGTAGAAAATGGAGCAGGAACAGGATGAACAGTTTATCCCCCTTTATCATCTAATATCGCTCATAGAGGTAGTTCAGTTGATTTAGCTATTTTTTCTTTACATTTAGCAGGAATTTCATCAATCTTAGGAGCTATTAATTTTATTACAACTATTATTAATATACGAATTAACCATATATCATTTGATCAAATACCTCTATTTGTATGAGCAGTAGGAATTACTGCTTTACTTTTATTATTATCTTTACCTGTATTAGCTGGTGCTATTACTATATTATTAACAGATCGAAATCTTAATACTTCATTTTTTGATCCTGCAGGAGGTGGAGATCCTATTTTATATCAACATTTA

HQ004902_RV_08_M361_Romania ACACTATATTTTATTTTTGGTATTTGAGCAGGTATAGTAGGAACCTCTTTAAGATTATTAATTCGTACTGAATTAGGTAATCCTGGATCTTTAATTGGAGATGATCAAATTTATAATACTATTGTAACAGCTCATGCTTTTATTATAATTTTTTTTATAGTTATACCAATTATAATTGGAGGATTTGGAAATTGATTAATTCCCTTAATATTAGGAGCCCCAGATATAGCTTTTCCTCGAATAAATAATATAAGATTTTGATTACTACCCCCCTCATTAACTTTATTAATTTCTAGAAGAATTGTAGAAAATGGAGCAGGAACAGGATGAACAGTTTATCCCCCTTTATCATCTAATATCGCTCATAGAGGTAGTTCAGTTGATTTAGCTATTTTTTCTTTACATTTAGCAGGAATTTCATCAATCTTAGGAGCTATTAATTTTATTACAACTATTATTAATATACGAATTAACCATATATCATTTGATCAAATACCTCTCTTTGTATGAGCAGTAGGAATTACTGCTTTACTTTTATTATTATCTTTACCTGTATTAGCTGGTGCTATTACTATATTATTAACAGATCGAAATCTTAATACTTCATTTTTTGATCCTGCAGGAGGTGGAGATCCTATTTTATATCAACATTTA

GU947642_Pmne_ITNEB01_Italy_Sicily ----------------------------------------------------------------------------------------------------------------------------------------------------------------------------------------------------------------------------------------------------------------------------CCCCTTCATTAACCTTATTAATTTCTAGAAGAATTGTAGAAAATGGAGCAGGAACTGGATGAACAGTTTACCCCCCTTTATCATCTAATATTGCTCATAGAGGAAGTTCAGTTGATTTAGCTATTTTTTCCTTACATTTAGCGGGAATTTCATCAATCTTAGGAGCTATTAATTTTATTACAACTATTATTAATATACGAATTAATCATATATCATTCGATCAAATACCTCTTTTTGTATGAGCAGTAGGAATTACTGCTTTACTTTTATTATTATCTTTACCTGTATTAGCTGGTGCTATTACTATATTATTAACAGATCGAAATCTTAATACTTCATTTTTTGATCCCGCAGGAGGTGGTGATCCTATTTTATACCAACATTTA

EU093018_Ca995 -----------------------------------------------------------------------------------------------------------------------------------------------------------------------------------------------------------TTTAATATTAGGAGCCCCAGATATAGCTTTTCCTCGAATAAATAATATAAGATTTTGATTACTGCCCCCCTCATTAACTTTATTAATTTCTAGAAGAATTGTAGAAAATGGAGCAGGAACAGGATGAACAGTTTATCCCCCTTTATCATCTAATATCGCTCATAGAGGTAGTTCAGTTGATTTAGCTATTTTTTCTTTACATTTAGCAGGAATTTCATCAATCTTAGGAGCTATTAATTTTATTACAACTATTATTAATATACGAATTAACCATATATCATTTGATCAAATACCTCTCTTTGTATGAGCAGTAGGAATTACTGCTTTACTTTTATTATTATCTTTACCTGTATTAGCTGGTGCTATTACTATATTATTAACAGATCGAAATCTTAATACTTCATTTTTTGATCCTGCAGGAGGTGGAGATCCTATTTTATATCAACATTTA

EU093017_Ch892 -----------------------------------------------------------------------------------------------------------------------------------------------------------------------------------------------------------TTTAATATTAGGAGCCCCAGATATAGCTTTCCCCCGAATAAATAATATAAGATTTTGATTACTACCCCCTTCATTAACCTTATTAATTTCTAGAAGAATTGTAGAAAATGGAGCAGGAACTGGATGAACAGTTTACCCCCCTTTATCATCTAATATTGCTCATAGAGGAAGTTCAGTTGATTTAGCTATTTTTTCCCTACATTTAGCGGGAATTTCATCAATCTTAGGAGCTATTAATTTTATTACAACTATTATCAATATACGAATTAATCATATATCATTCGATCAAATACCTCTTTTTGTATGAGCAGTAGGAATTACTGCTTTACTTTTATTATTATCCTTACCTGTATTAGCTGGTGCTATTACTATATTATTAACAGATCGAAATCTTAATACTTCATTTTTTGATCCAGCAGGAGGTGGTGATCCTATTTTATATCAACATTTA

EU093016_Tk889 -----------------------------------------------------------------------------------------------------------------------------------------------------------------------------------------------------------TTTAATATTAGGAGCCCCAGATATAGCTTTTCCTCGAATAAATAATATAAGATTTTGATTACTACCCCCCTCATTAACTTTATTAATTTCTAGAAGAATTGTAGAAAATGGAGCAGGAACAGGATGAACAGTTTATCCCCCTTTATCATCTAATATTGCTCATAGAATTAGTTCAGTTGATTTAGCTATTTTTTCTTTACATTTAGCAGGAATTTCATCAATCTTAGGAGCTATTAATTTTATTACAACTATTATTAATATACGAATTAATCATTTATCATTTGATCAAATACCCCTCTTTGTATGAGCAGTAGGAATTACTGCTTTACTTTTATTATTATCTTTACCTGTATTAGCTGGTGCTATTACTATATTATTAACAGATCGAAATCTTAATACTTCATTTTTTGATCCTGCAGGAGGTGGAGATCCTATTTTATATCAACATTTA

EU093015_It878 -----------------------------------------------------------------------------------------------------------------------------------------------------------------------------------------------------------TTTAATATTAGGAGCCCCAGATATAGCTTTCCCCCGAATAAATAATATAAGATTTTGATTACTACCCCCTTCATTAACCTTATTAATTTCTAGAAGAATTGTAGAAAATGGAGCAGGAACTGGATGAACAGTTTACCCCCCTTTATCATCTAATATTGCTCATAGAGGAAGTTCAGTTGATTTAGCTATTTTTTCCTTACATTTAGCGGGAATTTCATCAATCTTAGGAGCTATTAATTTTATTACAACTATTATTAATATACGAATTAATCATATATCATTCGATCAAATACCTCTTTTTGTATGAGCAGTAGGAATTACTGCTTTACTTTTATTATTATCTTTACCTGTATTAGCTGGTGCTATTACTATATTATTAACAGATCGAAATCTTAATACTTCATTTTTTGATCCAGCAGGAGGTGGTGATCCTATTTTATACCAACATTTA

EU093014_Hu875 -----------------------------------------------------------------------------------------------------------------------------------------------------------------------------------------------------------TTTAATATTAGGAGCCCCAGATATAGCTTTTCCTCGAATAAATAATATAAGATTTTGATTACTACCCCCCTCATTAACTTTATTAATTTCTAGAAGAATTGTAGAAAATGGAGCAGGAACAGGATGAACAGTTTATCCCCCTTTATCATCTAATATCGCTCATAGAGGTAGTTCAGTTGATTTAGCTATTTTTTCTTTACATTTAGCGGGAATTTCATCAATCTTAGGAGCTATTAATTTTATTACAACTATTATTAATATACGAATTAACCATATATCATTTGATCAAATACCTCTCTTTGTATGAGCAGTAGGAATTACTGCTTTACTTTTATTATTATCTTTACCTGTATTAGCTGGTGCTATTACTATATTATTAACAGATCGAAATCTTAATACTTCATTTTTTGATCCTGCAGGAGGTGGAGATCCTATTTTATATCAACATTTA

EU093013_Sk872_Cz_Slova -----------------------------------------------------------------------------------------------------------------------------------------------------------------------------------------------------------TTTAATATTAGGAGCCCCAGATATAGCTTTTCCTCGAATAAATAATATAAGATTTTGATTACTACCCCCCTCATTAACTTTATTAATTTCTAGAAGAATTGTAGAAAATGGAGCAGGAACAGGATGAACAGTTTATCCCCCTTTATCATCTAATATCGCTCATAGAGGTAGTTCAGTTGATTTAGCTATTTTTTCTTTACATTTGGCAGGAATTTCATCAATCTTAGGAGCTATTAATTTTATTACAACTATTATTAATATACGAATTAATCATATATCATTTGATCAAATACCTCTCTTTGTATGAGCAGTAGGAATTACTGCTTTACTTTTATTATTATCTTTACCTGTATTAGCTGGTGCTATTACTATATTATTAACAGATCGAAATCTTAATACTTCATTTTTTGATCCTGCAGGAGGTGGAGATCCTATTTTATATCAACATTTA

EU093011_Cz869 -----------------------------------------------------------------------------------------------------------------------------------------------------------------------------------------------------------TTTAATATTAGGAGCCCCAGATATAGCTTTTCCTCGAATAAATAATATAAGATTTTGATTACTACCCCCCTCATTAACTTTATTAATTTCTAGAAGAATTGTAGAAAATGGAGCAGGAACAGGATGAACAGTTTATCCCCCTTTATCATCTAATATTGCTCATAGAGGTAGTTCAGTTGATTTAGCTATTTTTTCTTTACATTTAGCAGGAATTTCATCAATCTTAGGAGCTATTAATTTTATTACAACTATTATTAATATACGAATTAACCATATATCATTTGATCAAATACCTCTCTTTGTATGAGCAGTAGGAATTACTGCTTTACTTTTATTATTATCTTTACCTGTATTAGCTGGTGTTATTACTATATTATTAACAGATCGAAATCTTAATACTTCATTTTTTGATCCTGCAGGAGGTGGAGATCCTATTTTATATCAACATTTA

EU093010_Ru_Bosnia_Fi_Bu_Hu_Bel_Po_Rom_Ukr_ -----------------------------------------------------------------------------------------------------------------------------------------------------------------------------------------------------------TTTAATATTAGGAGCCCCAGATATAGCTTTTCCTCGAATAAATAATATAAGATTTTGATTACTACCCCCCTCATTAACTTTATTAATTTCTAGAAGAATTGTAGAAAATGGAGCAGGAACAGGATGAACAGTTTATCCCCCTTTATCATCTAATATCGCTCATAGAGGTAGTTCAGTTGATTTAGCTATTTTTTCTTTACATTTAGCAGGAATTTCATCAATCTTAGGAGCTATTAATTTTATTACAACTATTATTAATATACGAATTAACCATATATCATTTGATCAAATACCTCTCTTTGTATGAGCAGTAGGAATTACTGCTTTACTTTTATTATTATCTTTACCTGTATTAGCTGGTGCTATTACTATATTATTAACAGATCGAAATCTTAATACTTCATTTTTTGATCCTGCAGGAGGTGGAGATCCTATTTTATATCAACATTTA

EU093009_Kz848 -----------------------------------------------------------------------------------------------------------------------------------------------------------------------------------------------------------TTTAATATTAGGGGCCCCAGATATAGCTTTTCCTCGAATAAATAATATAAGATTTTGATTATTACCCCCTTCATTAACTTTATTAATTTCTAGAAGAATTGTAGAAAATGGAGCAGGAACAGGATGAACAGTTTATCCCCCTTTATCATCTAATATCGCTCATAGAGGTAGTTCAGTTGATTTAGCTATTTTTTCTTTACATTTAGCAGGAATTTCATCAATCTTAGGAGCTATTAATTTTATTACAACTATTATTAATATACGAATTAATCATATATCATTTGATCAAATACCTCTCTTTGTATGAGCAGTAGGAATTACTGCTTTACTTTTATTACTATCTTTACCTGTATTAGCTGGTGCTATTACTATATTATTAACAGATCGAAATCTTAATACTTCATTTTTTGATCCTGCAGGAGGTGGAGATCCTATTTTATATCAACATTTA

EU093007_Fi810 -----------------------------------------------------------------------------------------------------------------------------------------------------------------------------------------------------------TTTAATATTAGGAGCCCCAGATATAGCCTTTCCTCGAATAAATAATATAAGATTTTGATTACTACCCCCCTCATTAACTTTATTAATTTCTAGAAGAATTGTAGAAAATGGAGCAGGAACAGGATGAACAGTTTATCCCCCTTTATCATCTAATATCGCTCATAGAGGTAGTTCAGTTGATTTAGCTATTTTTTCTTTACATTTAGCAGGAATTTCATCAATCTTAGGAGCTATTAATTTTATTACAACTATTATTAATATACGAATTAACCATATATCATTTGATCAAATACCTCTCTTTGTATGAGCAGTAGGAATTACTGCTTTACTTTTATTATTATCTTTACCTGTATTAGCTGGTGCTATTACTATATTATTAACAGATCGAAATCTTAATACTTCATTTTTTGATCCTGCAGGAGGTGGAGATCCTATTTTATATCAACATTTA

EU093004_Tu999 -----------------------------------------------------------------------------------------------------------------------------------------------------------------------------------------------------------TTTAATATTAGGAGCTCCAGATATAGCTTTTCCTCGAATAAATAACATAAGATTTTGATTACTCCCCCCTTCATTAACTTTATTAATTTCTAGAAGAATTGTAGAAAATGGAGCAGGAACAGGATGAACAGTTTATCCCCCTTTATCATCTAATATTGCTCATAGAGGTAGTTCAGTTGATTTAGCTATTTTTTCTTTACATTTAGCAGGAATTTCATCAATCTTAGGAGCTATTAATTTTATTACAACTATTATTAATATACGAATTAATAATATATCATTTGATCAAATACCTCTTTTTGTATGAGCAGTAGGAATTACTGCATTACTTTTATTATTATCTTTACCTGTATTAGCTGGTGCTATTACTATATTATTAACAGATCGAAATCTTAATACTTCATTTTTTGATCCCGCAGGAGGTGGAGATCCTATTTTATATCAACACTTA

EU093000_Bu961 -----------------------------------------------------------------------------------------------------------------------------------------------------------------------------------------------------------TTTAATATTAGGAGCCCCAGATATAGCTTTTCCTCGAATAAATAATATAAGATTTTGATTACTACCCCCCTCATTAACTTTATTAATTTCTAGAAGAATTGTAGAAAATGGAGCAGGAACAGGATGAACAGTTTATCCCCCTTTATCATCTAATATCGCTCATAGAGGTAGTTCAGTTGATTTAGCTATTTTTTCTTTACATTTAGCAGGAATTTCATCAATCTTAGGAGCTATTAATTTTATTACAACTATTATTAATATACGAATTAATCATATATCATTTGATCAAATACCTCTCTTTGTATGAGCAGTAGGAATTACTGCTTTACTTTTATTATTATCTTTACCTGTATTAGCTGGTGCTATTACTATATTATTAACAGATCGAAATCTTAATACTTCATTTTTTGATCCTGCAGGAGGTGGAGATCCTATTTTATATCAACATTTA

EU092998_Bu951 -----------------------------------------------------------------------------------------------------------------------------------------------------------------------------------------------------------TTTAATATTAGGAGCCCCAGATATAGCTTTTCCTCGAATAAATAATATAAGATTTTGATTACTACCCCCCTCATTAACTTTATTAATTTCTAGAAGAATTGTAGAAAATGGAGCAGGAACAGGATGAACAGTTTATCCCCCTTTATCATCTAATATCGCTCATAGTGGTAGTTCAGTTGATTTAGCTATTTTTTCTTTACATTTAGCAGGAATTTCATCAATCTTAGGAGCTATTAATTTTATTACAACTATTATTAATATACGAATTAACCATATATCATTTGATCAAATACCTCTCTTTGTATGAGCAGTAGGAATTACTGCTTTACTTTTATTATTATCTTTACCTGTATTAGCTGGTGCTATTACTATATTATTAACAGATCGAAATCTTAATACTTCATTTTTTGATCCTGCAGGAGGTGGAGATCCTATTTTATATCAACATTTA

EU092997_Ru940 -----------------------------------------------------------------------------------------------------------------------------------------------------------------------------------------------------------TTTAATATTAGGAGCCCCAGATATAGCTTTTCCTCGAATAAATAATATAAGATTTTGATTACTACCCCCCTCATTAACTTTATTAATTTCTAGAAGAATTGTAGAAAATGGAGCAGGAACAGGATGAACAGTTTATCCCCCTTTATCATCTAATATCGCTCATAGAGGTAGTTCAGTTGATTTAGCTATTTTTTCTTTACATTTAGCAGGAATTTCATCAATCTTAGGAGCTATTAATTTTATTACAACTATTATTAATATACGAATTAACCATATATCATTTGATCAAATACCTCTCTTTGTATGAGCAGTAGGAATTACTGCTTTACTTTTATTATTATCTCTACCTGTATTAGCTGGTGCTATTACTATATTATTAACAGATCGAAATCTTAATACTTCATTTTTTGATCCTGCAGGAGGTGGGGATCCTATTTTATATCAACATTTA

EU092996_Sp924_Fr -----------------------------------------------------------------------------------------------------------------------------------------------------------------------------------------------------------TTTAATATTAGGAGCCCCAGATATAGCTTTCCCCCGAATAAATAATATAAGATTTTGATTACTACCCCCTTCATTAACCTTATTAATTTCTAGAAGAATTGTAGAAAATGGAGCAGGAACTGGATGAACAGTTTACCCCCCTTTATCATCCAATATTGCTCATAGAGGAAGTTCAGTTGATTTAGCTATTTTTTCCCTACATTTAGCAGGAATTTCATCAATCTTAGGAGCTATTAATTTTATTACAACTATTATTAATATACGAATTAATCATATATCATTCGATCAAATACCTCTTTTTGTGTGAGCAGTAGGAATTACTGCTTTACTTTTATTATTATCCTTACCTGTATTAGCTGGTGCTATTACTATATTATTAACAGATCGAAATCTTAATACTTCATTTTTTGATCCAGCAGGAGGTGGTGATCCTATTTTATATCAACATTTA

EU092995_Sp923 -----------------------------------------------------------------------------------------------------------------------------------------------------------------------------------------------------------TTTAATATTAGGAGCCCCAGATATAGCTTTCCCCCGAATAAATAATATAAGATTTTGATTACTACCCCCTTCATTAACCTTATTAATTTCTAGAAGAATTGTAGAAAATGGAGCAGGAACTGGATGAACAGTTTATCCCCCTTTATCATCCAATATTGCTCATAGAGGAAGTTCAGTTGATTTAGCTATTTTTTCCCTACATTTAGCGGGAATTTCATCAATCTTAGGAGCTATTAATTTTATTACAACTATTATTAATATACGAATTAATCATATATCATTCGATCAAATACCTCTTTTTGTGTGAGCAGTAGGAATTACTGCTTTACTTTTATTATTATCCTTACCTGTATTAGCTGGTGCTATTACTATATTATTAACGGATCGAAATCTTAATACTTCATTTTTTGATCCAGCAGGAGGTGGTGATCCTATTTTATATCAACATTTA

EU092994_Sp921 -----------------------------------------------------------------------------------------------------------------------------------------------------------------------------------------------------------TTTAATATTAGGAGCCCCAGATATAGCTTTCCCCCGAATAAATAATATAAGATTTTGATTACTACCCCCTTCATTAACCTTATTAATTTCTAGAAGAATTGTAGAAAATGGAGCAGGAACTGGATGAACAGTTTACCCCCCTTTATCATCCAATATTGCTCATAGAGGAAGTTCAGTTGATTTAGCTATTTTTTCCCTACATTTAGCAGGAATTTCATCAATCTTAGGAGCTATTAATTTTATTACAACTATTATTAATATACGAATTAATCATATATCATTCGATCAAATACCTCTTTTTGTGTGAGCAGTAGGAATTACTGCTTTACTTTTATTATTATCCTTACCTGTATTAGCTGGTGCTATTACTATATTATTAACGGATCGAAATCTTAATACTTCATTTTTTGATCCAGCAGGAGGTGGTGATCCTATTTTATATCAACATTTA

EU092993_Sp917 -----------------------------------------------------------------------------------------------------------------------------------------------------------------------------------------------------------TTTAATATTAGGAGCCCCAGATATAGCTTTCCCCCGAATAAATAATATAAGATTTTGATTACTACCCCCTTCATTAACCTTATTAATTTCTAGAAGAATTGTAGAAAATGGAGCAGGAACTGGATGAACAGTTTATCCCCCTTTATCATCCAATATTGCTCATAGAGGAAGTTCAGTTGATTTAGCTATTTTTTCCCTACATTTAGCAGGAATTTCATCAATCTTAGGAGCTATTAATTTTATTACAACTATTATTAATATACGAATTAATCATATATCATTCGATCAAATACCTCTTTTTGTGTGAGCAGTAGGAATTACTGCTTTACTTTTATTATTATCCTTACCTGTATTAGCTGGTGCTATTACTATATTATTAACAGATCGAAATCTTAATACTTCATTTTTTGATCCAGCAGGAGGTGGTGATCCTATTTTATATCAACATTTA

EU092992_Sp916 -----------------------------------------------------------------------------------------------------------------------------------------------------------------------------------------------------------TTTAATATTAGGAGCCCCAGATATAGCTTTCCCCCGAATAAATAATATAAGATTTTGATTACTACCCCCTTCATTAACCTTATTAATTTCTAGAAGAATTGTAGAAAATGGAGCAGGAACTGGATGAACAGTTTACCCCCCTTTATCATCCAATATTGCTCATAGAGGAAGTTCAGTTGATTTAGCTATTTTTTCCCTACATTTAGCAGGAATTTCATCAATCTTAGGAGCTATTAATTTTATTACAACTATTATTAATATACGAATTAATCATATATCATTCGATCAAATACCTCTTTTTGTGTGAGCAGTAGGAATTACTGCTTTACTTTTATTATTATCCTTACCTGTATTAGCTGGTGCTATTACTATATTATTAACAGATCGAAATATTAATACTTCATTTTTTGATCCAGCAGGAGGTGGTGATCCTATTTTATATCAACATTTA

EU092991_Fr913 -----------------------------------------------------------------------------------------------------------------------------------------------------------------------------------------------------------TTTAATATTAGGAGCCCCAGATATAGCTTTCCCCCGAATAAATAATATAAGATTTTGATTACTACCCCCTTCATTAACCTTATTAATTTCTAGAAGAATTGTAGAAAATGGAGCAGGAACTGGATGAACAATTTACCCCCCTTTATCATCCAATATTGCTCATAGAGGAAGTTCAGTTGATTTAGCTATTTTTTCCCTACATTTAGCAGGAATTTCATCAATCTTAGGAGCTATTAATTTTATTACAACTATTATTAATATACGAATTAATCATATATCATTCGATCAAATACCTCTTTTTGTGTGAGCAGTAGGAATTACTGCTTTACTTTTATTATTATCCTTACCTGTATTAGCTGGTGCTATTACTATATTATTAACAGATCGAAATCTTAATACTTCATTTTTTGATCCAGCAGGAGGTGGTGATCCTATTTTATATCAACATTTA

EU092990_Fr911 -----------------------------------------------------------------------------------------------------------------------------------------------------------------------------------------------------------TTTAATATTAGGAGCCCCAGATATAGCTTTCCCCCGAATAAATAATATAAGATTTTGATTACTACCCCCTTCATTAACCTTATTAATTTCTAGAAGAATTGTAGAAAATGGAGCAGGAACTGGATGAACAGTTTACCCCCCTTTATCATCTAATATTGCTCATAGAGGAAGTTCAGTTGATTTAGCTATTTTTTCCTTACATTTAGCAGGAATTTCATCAATCTTAGGAGCTATTAATTTTATTACAACTATTATTAATATACGAATTAATCATATATCATTCGATCAAATACCTCTTTTTGTATGAGCAGTAGGAATTACTGCTTTACTTTTATTATTATCATTACCTGTATTAGCTGGTGCTATTACTATATTATTAACAGATCGAAATCTTAATACTTCATTTTTTGATCCAGCAGGGGGTGGTGATCCTATTTTATATCAACATTTA

EU092988_It639 -----------------------------------------------------------------------------------------------------------------------------------------------------------------------------------------------------------TTTAATATTAGGAGCCCCAGATATAGCTTTCCCCCGAATAAATAATATAAGATTTTGATTACTACCCCCTTCATTAACCTTATTAATTTCTAGAAGAATTGTAGAAAATGGAGCAGGAACTGGATGAACAGTTTACCCCCCTTTATCATCTAATATTGCTCATAGAGGAAGTTCAGTTGATTTAGCTATTTTTTCCCTACATTTAGCGGGAATTTCATCAATCTTAGGAGCTATTAATTTTATTACAACTATTATTAATATACGAATTAATCATATATCATTTGATCAAATACCTCTTTTTGTATGAGCAGTAGGAATTACTGCTTTACTTTTATTATTATCCTTACCTGTATTAGCTGGTGCTATTACTATATTATTAACAGATCGAAATCTTAATACTTCATTTTTTGATCCAGCAGGAGGTGGTGATCCTATTTTATATCAACATTTA

EU092987_Fr528 -----------------------------------------------------------------------------------------------------------------------------------------------------------------------------------------------------------TTTAATATTAGGAGCCCCAGATATAGCTTTCCCCCGAATAAATAATATAAGATTTTGATTACTACCCCCTTCATTAACCTTATTAATTTCTAGAAGAATTGTAGAAAATGGAGCAGGAACTGGATGAACAGTTTACCCCCCTTTATCATCTAATATTGCTCATAGAGGAAGTTCAGTTGATTTAGCTATTTTTTCCCTACATTTAGCGGGAATTTCATCAATCTTAGGAGCTATTAATTTTATTACAACTATTATTAATATACGAATTAATCATATATCATTCGATCAAATACCTCTTTTTGTATGAGCAGTAGGAATTACTGCTTTACTTTTATTATTATCCTTACCTGTATTAGCTGGTGCTATTACTATATTATTAACAGATCGAAATCTTAATACTTCATTTTTTGATCCAGCAGGAGGTGGTGATCCTATTTTATATCAACATTTA

EU092985_Fr525 -----------------------------------------------------------------------------------------------------------------------------------------------------------------------------------------------------------TTTAATATTAGGAGCCCCAGATATAGCTTTCCCCCGAATAAATAATATAAGATTTTGATTACTACCCCCTTCATTAACCTTATTAATTTCTAGAAGAATTGTAGAAAATGGAGCAGGAACTGGATGAACAGTTTACCCCCCTTTATCATCTAATATTGCTCATAGAGGAAGTTCAGTTGATTTAGCTATTTTTTCCTTACATTTAGCAGGAATTTCATCAATCTTAGGAGCTATTAATTTTATTACAACTATTATTAATATACGAATTAATCATATATCATTCGATCAAATACCTCTTTTTGTATGAGCAGTAGGAATTACTGCTTTACTTTTATTATTATCATTACCTGTATTAGCTGGTGCTATTACTATATTATTAACAGATCGAAATCTTAATACTTCATTTTTTGATCCAGCAGGAGGTGGTGATCCTATTTTATATCAACATTTA

EU092984_Fr522 -----------------------------------------------------------------------------------------------------------------------------------------------------------------------------------------------------------TTTAATATTAGGAGCCCCAGATATAGCTTTCCCCCGAATAAATAATATAAGATTTTGATTACTACCCCCTTCATTAACCTTATTAATTTCTAGAAGAATTGTAGAAAATGGAGCAGGAACTGGATGAACAGTTTACCCCCCTTTATCATCTAATATTGCTCATAGAGGAAGTTCAGTTGATTTAGCTATTTTTTCCTTACATTTAGCAGGAATTTCATCAATCTTAGGAGCTATTAATTTTATTACAACTATTATTAATATACGAATTAATCATATATCATTCGATCAAATACCTCTTTTTGTATGAGCAGTAGGAATTACTGCTTTACTCTTATTATTATCATTACCTGTATTAGCTGGTGCTATTACTATATTATTAACAGATCGAAATCTTAATACTTCATTTTTTGATCCAGCAGGGGGTGGTGATCCTATTTTATATCAACATTTA

EU092983_Ch765 -----------------------------------------------------------------------------------------------------------------------------------------------------------------------------------------------------------TTTAATATTAGGAGCCCCAGATATAGCTTTCCCCCGAATAAATAATATAAGATTTTGATTACTACCCCCTTCATTAACCTTATTAATTTCTAGAAGAATTGTAGAAAATGGAGCAGGAACTGGATGAACAGTTTACCCCCCTTTATCATCTAATATTGCTCATAGAGGAAGTTCAGTTGATTTAGCTATTTTTTCCCTACATTTAGCAGGAATTTCATCAATCTTAGGAGCTATTAATTTTATTACAACTATTATTAATATACGAATTAATCATATATCATTCGATCAAATACCTCTTTTTGTATGAGCAGTAGGAATTACTGCTTTACTTTTATTATTATCCTTACCTGTATTAGCTGGTGCTATTACTATATTATTAACAGATCGAAATCTTAATACTTCATTTTTTGATCCAGCAGGAGGTGGTGATCCTATTTTATATCAACATTTA

EU092982_Pl653_Slova_Ukr -----------------------------------------------------------------------------------------------------------------------------------------------------------------------------------------------------------TTTAATATTAGGAGCCCCAGATATAGCTTTTCCTCGAATAAATAATATAAGATTTTGATTACTACCCCCCTCATTAACTTTATTAATTTCTAGAAGAATTGTAGAAAATGGAGCAGGAACAGGATGAACAATTTATCCCCCTTTATCATCTAATATCGCTCATAGAGGTAGTTCAGTTGATTTAGCTATTTTTTCTTTACATTTAGCAGGAATTTCATCAATCTTAGGAGCTATTAATTTTATTACAACTATTATTAATATACGAATTAACCATATATCATTTGATCAAATACCTCTCTTTGTATGAGCAGTAGGAATTACTGCTTTACTTTTATTATTATCTTTACCTGTATTAGCTGGTGCTATTACTATATTATTAACAGATCGAAATCTTAATACTTCATTTTTTGATCCTGCAGGAGGTGGAGATCCTATTTTATATCAACATTTA

EU092981_At626 -----------------------------------------------------------------------------------------------------------------------------------------------------------------------------------------------------------TTTAATATTAGGAGCCCCAGATATAGCTTTTCCTCGAATAAATAATATAAGATTTTGATTACTACCCCCCTCATTAACTTTATTAATTTCTAGAAGAATTGTAGAAAATGGAGCAGGAACAGGATGAACAGTTTATCCCCCTTTATCATCTAATATCGCTCATAGAGGTAGTTCAGTTGATTTAGCTATTTTTTCTTTACATTTAGCAGGAATTTCATCAATCTTAGGAGCTATTAATTTTATTACAACTATTATTAATATACGAATTAACCATATATCATTTGATCAAATACCTCTCTTTGTATGAGCAGTAGGAATTACTGCTTTACTTTTATTATTATCTTTACCTGTGTTAGCTGGTGCTATTACTATATTATTAACAGATCGAAATCTTAATACTTCATTTTTTGATCCTGCAGGAGGTGGAGATCCTATTTTATATCAACATTTA

EU092980_At622 -----------------------------------------------------------------------------------------------------------------------------------------------------------------------------------------------------------TTTAATATTAGGAGCCCCAGATATAGCTTTTCCTCGAATAAATAATATAAGATTTTGATTACTACCCCCCTCATTAACTTTATTAATTTCTAGAAGAATTGTAGAAAATGGAGCAGGAACAGGATGAACAGTTTATCCCCCTTTATCATCTAATATTGCTCATAGAGGTAGTTCAGTTGATTTAGCTATTTTTTCTTTACATTTAGCAGGAATTTCATCAATCTTAGGAGCTATTAATTTTATTACAACTATTATTAATATACGAATTAACCATATATCATTTGATCAAATACCTCTCTTTGTATGAGCAGTAGGAATTACTGCTTTACTTTTATTACTATCTTTACCTGTATTAGCTGGTGCTATTACTATATTATTAACAGATCGAAATCTTAATACTTCATTTTTTGATCCTGCAGGAGGTGGAGATCCTATTTTATATCAACATTTA

EU092978_At618_At_Slo -----------------------------------------------------------------------------------------------------------------------------------------------------------------------------------------------------------TTTAATATTAGGAGCCCCAGATATAGCTTTTCCTCGAATAAATAATATAAGATTTTGATTACTACCCCCCTCATTAACTTTATTAATTTCTAGAAGAATTGTAGAAAATGGGGCAGGAACAGGATGAACAGTTTATCCCCCTTTATCATCTAATATCGCTCATAGAGGTAGTTCAGTTGATTTAGCTATTTTTTCTTTACATTTAGCAGGAATTTCATCAATCTTAGGAGCTATTAATTTTATTACAACTATTATTAATATACGAATTAACCATATATCATTTGATCAAATACCTCTCTTTGTATGAGCAGTAGGAATTACTGCTTTACTTTTATTATTATCTTTACCTGTATTAGCTGGTGCTATTACTATATTATTAACAGATCGAAATCTTAATACTTCATTTTTTGATCCTGCAGGAGGTGGAGATCCTATTTTATATCAACATTTA

EU092977_At606_At_Cz_D_Fi_Hu_Po_Slova -----------------------------------------------------------------------------------------------------------------------------------------------------------------------------------------------------------TTTAATATTAGGAGCCCCAGATATAGCTTTTCCTCGAATAAATAATATAAGATTTTGATTACTACCCCCCTCATTAACTTTATTAATTTCTAGAAGAATTGTAGAAAATGGAGCAGGAACAGGATGAACAGTTTATCCCCCTTTATCATCTAATATTGCTCATAGAGGTAGTTCAGTTGATTTAGCTATTTTTTCTTTACATTTAGCAGGAATTTCATCAATCTTAGGAGCTATTAATTTTATTACAACTATTATTAATATACGAATTAACCATATATCATTTGATCAAATACCTCTCTTTGTATGAGCAGTAGGAATTACTGCTTTACTTTTATTATTATCTTTACCTGTATTAGCTGGTGCTATTACTATATTATTAACAGATCGAAATCTTAATACTTCATTTTTTGATCCTGCAGGAGGTGGAGATCCTATTTTATATCAACATTTA

EU092976_At602 -----------------------------------------------------------------------------------------------------------------------------------------------------------------------------------------------------------TTTAATATTAGGAGCCCCAGATATAGCTTTTCCTCGAATAAATAATATAAGATTTTGATTACTACCCCCCTCATTAACTTTATTAATTTCTAGAAGAATTGTAGAAAATGGAGCAGGAACAGGATGAACAGTTTATCCCCCTTTATCATCTAATATTGCTCATAGAGGTAGTTCAGTTGATTTAGCTATTTTTTCTTTACATTTAGTAGGAATTTCATCAATCTTAGGAGCTATTAATTTTATTACAACTATTATTAATATACGAATTAACCATATATCATTTGATCAAATACCTCTCTTTGTATGAGCAGTAGGAATTACTGCTTTACTTTTATTATTATCTTTACCTGTATTAGCTGGTGCTATTACTATATTATTAACAGATCGAAATCTTAATACTTCATTTTTTGATCCTGCAGGAGGTGGAGATCCTATTTTATATCAACATTTA

EU092975_D757 -----------------------------------------------------------------------------------------------------------------------------------------------------------------------------------------------------------TTTAATATTAGGAGCCCCAGATATAGCTTTTCCTCGAATAAATAATATAAGATTTTGATTACTACCCCCCTCATTAACTTTATTAATTTCTAGAAGAATTGTAGAAAATGGAGCAGGAACAGGATGAACAGTTTATCTTCCTTTATCATCTAATATTGCTCATAGAGGTAGTTCAGTTGATTTAGCTATTTTTTCTTTACATTTAGCAGGAATTTCATCAATCTTAGGAGCTATTAATTTTATTACAACTATTATTAATATACGAATTAACCATATATCATTTGATCAAATACCTCTCTTTGTATGAGCAGTAGGAATTACTGCTTTACTTTTATTATTATCTTTACCTGTATTAGCTGGTGCTATTACTATATTATTAACAGATCGAAATCTTAATACTTCATTTTTTGATCCTGCAGGAGGTGGAGATCCTATTTTATATCAACATTTA

EU092974_D756 -----------------------------------------------------------------------------------------------------------------------------------------------------------------------------------------------------------TTTAATATTAGGAGCCCCAGATATAGCTTTTCCTCGAATAAATAATATAAGATTTTGATTACTACCCCCCTCATTAACTTTATTAATTTCTAGAAGAATTGTAGAAAATGGAGCAGGAACAGGATGAACAATTTATCCCCCTTTATCATCTAATATTGCTCATAGAGGTAGTTCAGTTGATTTAGCTATTTTTTCTTTACATTTAGCAGGAATTTCATCAATCTTAGGAGCTATTAATTTTATTACAACTATTATTAATATACGAATTAACCATATATCATTTGATCAAATACCTCTCTTTGTATGAGCAGTAGGAATTACTGCTTTACTTTTATTATTATCTTTACCTGTATTAGCTGGTGCTATTACTATATTATTAACAGATCGAAATCTTAATACTTCATTTTTTGATCCTGCAGGAGGTGGAGATCCTATTTTATATCAACATTTA

EU092973_D744 -----------------------------------------------------------------------------------------------------------------------------------------------------------------------------------------------------------TTTAATATTAGGAGCCCCAGATATAGCTTTTCCTCGAATAAATAATATAAGATTTTGATTACTACCCCCCTCATTAACTTTATTAATTTCTAGAAGAATTGTAGAAAATGGAGCAGGAACAGGATGAACGGTTTATCCCCCTTTATCATCTAATATTGCTCATAGAGGTAGTTCAGTTGATTTAGCTATTTTTTCTTTACATTTAGCAGGAATTTCATCAATCTTAGGAGCTATTAATTTTATTACAACTATTATTAATATACGAATTAACCATATATCATTTGATCAAATACCTCTCTTTGTATGAGCAGTAGGAATTACTGCTTTACTTTTATTATTATCTTTACCTGTATTAGCTGGTGCTATTACTATATTATTAACAGATCGAAATCTTAATACTTCATTTTTTGATCCTGCAGGAGGTGGAGATCCTATTTTATATCAACATTTA

EU092971_Hu697_Bu_Hu -----------------------------------------------------------------------------------------------------------------------------------------------------------------------------------------------------------TTTAATATTAGGAGCCCCAGATATAGCTTTTCCTCGAATAAATAATATAAGATTTTGATTACTACCCCCCTCATTAACTTTATTAATTTCTAGAAGAATTGTAGAAAATGGAGCAGGAACAGGATGAACAGTTTATCCCCCTTTATCATCTAATATCGCTCATAGAGGTAGTTCAGTTGATTTAGCTATTTTTTCTTTACATTTAGCAGGAATTTCATCAATCTTAGGAGCTATTAATTTTATTACAACTATTATTAATATACGAATTAACCATATATCATTTGATCAAATACCTCTCTTTGTATGAGCAGTAGGAATTACTGCTTTACTTTTATTATTATCTTTACCTGTATTAGCTGGTGCTATTACTATATTATTAACAGATCGAAATCTTAATACTTCATTTTTTGATCCTGCAGGAGGTGGAGATCCTATTTTATATCAACATTTA

EU092969_Bu775 -----------------------------------------------------------------------------------------------------------------------------------------------------------------------------------------------------------TTTAATATTAGGAGCCCCAGATATAGCTTTTCCTCGAATAAATAATATAAGATTTTGATTACTACCCCCCTCATTAACTTTATTAATTTCTAGAAGAATTGTAGAAAATGGAGCAGGAACAGGATGAACAATTTATCCCCCTTTATCATCTAATATCGCTCACAGAGGTAGTTCAGTTGATTTAGCTATTTTTTCTTTACATTTAGCAGGAATTTCATCAATCTTAGGAGCTATTAATTTTATTACAACTATTATTAATATACGAATTAACCATATATCATTTGATCAAATACCTCTCTTTGTATGAGCAGTAGGAATTACTGCTTTACTTTTATTATTATCTTTACCTGTATTAGCTGGTGCTATTACTATATTATTAACAGATCGAAATCTTAATACTTCATTTTTTGATCCTGCAGGAGGTGGAGATCCTATTTTATATCAACATTTA

EU092968_Bu772 -----------------------------------------------------------------------------------------------------------------------------------------------------------------------------------------------------------TTTAATATTAGGAGCCCCAGATATAGCTTTTCCTCGAATAAATAATATAAGATTTTGATTACTACCCCCCTCATTAACTTTATTAATTTCTAGAAGAATTGTAGAAAATGGAGCAGGAACAGGATGAACAGTTTATCCCCCTTTATCATCTAATATCGCTCATAGAGGTAGTTCAGTTGATTTAGCTATTTTTTCTTTACATTTAGCAGGAATTTCATCAATCTTAGGAGCTATTAATTTTATTACAACTATTATTAATATACGAATTAACCATATATCATTTGATCAAATACCTCTCTTTGTATGAGCAGTAGGAATTACTGCTTTACTTTTATTATTATCTCTACCTGTATTAGCTGGTGCTATTACTATATTATTAACAGATCGAAATCTTAATACTTCATTTTTTGATCCTGCAGGAGGTGGAGATCCTATTTTATATCAACATTTA

EU093003_D982 -----------------------------------------------------------------------------------------------------------------------------------------------------------------------------------------------------------TTTAATATTAGGAGCCCCAGATATAGCTTTTCCTCGAATAAATAATATAAGATTTTGATTACTACCCCCCTCATTAACTTTATTAATTTCTAGAAGAATTGTAGAAAATGGAGCAGGAACAGGATGAACAGTTTATCCCCCTTTATCATCTAATATTGCTCATAGAGGTAGTTCAGTTGATTTAGCTATTTTTTCTTTACATTTAGCAGGAATTTCATCAATCTTAGGAGCTATTAATTTTATTACAACTATTATTAATATACGAATTAACCATATATCATTTGATCAAATACCTCTCTTTGTATGGGCAGTAGGAATTACTGCTTTACTTTTATTATTATCTTTACCTGTATTAGCTGGTGCTATTACTATATTATTAACAGATCGAAATCTTAATACTTCATTTTTTGATCCTGCAGGAGGTGGAGATCCTATTTTATATCAACATTTA

DQ407769_UP_100_F ACATTATATTTTATTTTTGGTATTTGAGCAGGTATAGTAGGAACCTCTTTAAGATTATTAATTCGTACTGAATTAGGTAATCCTGGATCTTTAATTGGAGATGATCAAATTTATAACACTATTGTAACAGCTCATGCTTTTATTATAATTTTTTTTATAGTTATACCAATTATAATTGGAGGATTTGGAAATTGATTAATTCCTTTAATATTAGGAGCCCCAGATATAGCTTTCCCCCGAATAAATAATATAAGATTTTGATTACTACCCCCTTCATTAACCTTATTAATTTCTAGAAGAATTGTAGAAAATGGAGCAGGAACTGGATGAACAGTTTACCCCCCTTTATCATCTAATATTGCTCATAGAGGAAGTTCAGTTGATTTAGCTATTTTTTCCTTACATTTAGCAGGAATTTCATCAATCTTAGGAGCTATTAATTTTATTACAACTATTATTAATATACGAATTAATCATATATCATTCGATCAAATACCTCTTTTTGTATGAGCAGTAGGAATTACTGCTTTACTCTTATTATTATCATTACCTGTATTAGCTGGTGCTATTACTATATTATTAACAGATCGAAATCTTAATACTTCATTTTTTGATCCAGCAGGGGGTGGTGA----------------------

AM231426_W336_parvisi_Gre ACACTATATTTTATTTTTGGTATTTGAGCAGGTATAGTAGGAACCTCTTTAAGATTATTAATTCGTACTGAATTAGGTAATCCTGGATCTTTAATTGGAGATGATCAAATTTATAATACTATTGTAACAGCTCATGCTTTTATTATAATTTTTTTTATAGTTATACCAATTATAATTGGAGGATTTGGAAATTGATTAATTCCTTTAATATTAGGAGCCCCAGATATAGCTTTTCCTCGAATAAATAATATAAGATTTTGATTACTACCCCCCTCATTAACTTTATTAATTTCTAGAAGAATTG????????????????????GGATGAACAGTTTATCCCCCTTTATCATCTAATATCGCTCATAGAGGTAGTTCAGTTGATTTAGCTATTTTTTCTTTACATTTAGCAGGAATTTCATCAATCTTAGGGGCTATTAATTTTATTACAACTATTATTAATATACGAATTAACCATATATCATTTGATCAAATACCTCTCTTTGTATGAGCAGTAGGAATTACTGCTTTACTTTTATTATTATCTTTACCTGTATTAGCTGGTGCTATTACTATATTATTAACAGATCGAAATCTTAATACTTCATTTTTTGATCYTGCAGGAGGTGGAGATCCTATTTTATATCAA------

AM231425_W333_angorae_Tur ACACTATATTTTATTTTTGGTATTTGAGCAGGTATAGTAGGAACCTCTTTAAGATTATTAATTCGTACTGAATTAGGTAATCCTGGATCTTTAATTGGGGATGATCAAATTTATAATACTATTGTAACAGCTCATGCTTTTATTATAATTTTTTTTATAGTTATACCAATTATAATTGGAGGATTTGGAAATTGATTAATTCCTTTAATATTAGGAGCCCCAGATATAGCTTTTCCTCGAATAAATAATATAAGATTTTGATTATTACCCCCCTCATTAACTTTATTAATTTCTAGAAGAATTG????????????????????GGATGAACAGTTTATCCCCCTTTATCATCTAATATTTCTCATAGAGGTAGTTCAGTTGATTTAGCTATTTTTTCTTTACATTTAGCAGGAATTTCATCAATCTTAGGAGCTATTAATTTTATTACAACTATTATTAATATACGAATTAATCATATATCATTTGATCAAATACCCCTTTTTGTATGGGCAGTAGGAATTACTGCTTTACTTTTATTATTATCTTTACCTGTATTAGCTGGTGCTWTTACTATATTATTAACAGATCGAAATCTTAATACTTCATTTTTCGATCCCGCAGGAGGTGGGGATCCTATTTTATATCAA------

AM231424_W331_angorae_Tur_Ankara ACACTATATTTTATTTTTGGTATTTGAGCAGGTATAGTAGGAACCTCTTTAAGATTATTAATTCGTACTGAATTAGGTAATCCTGGATCTTTAATTGGAGATGATCAAATTTATAATACTATTGTAACAGCTCATGCTTTTATTATAATTTTTTTTATAGTTATACCAATTATAATTGGAGGATTTGGAAATTGATTAATTCCTTTAATATTAGGAGCCCCAGATATAGCTTTTCCTCGAATAAATAATATAAGATTTTGATTATTACCCCCCTCATTAACTTTATTAATTTCTAGAAGAATTGTA??????????????????GGATGAACAGTTTATCCCCCTTTATCATCTAATATCGCTCATAGAGGTAGCTCAGTTGATTTAGCTATTTTTTCTTTACATTTAGCAGGAATTTCATCAATCTTAGGAGCTATTAATTTTATTACAACTATTATTAATATACGAATTAACCATATATCATTTGATCAAATACCTCTCTTTGTATGAGCAGTAGGAATTACCGCTTTACTTTTATTATTATCTTTACCTGTATTAGCTGGTGCTATTACTATATTATTAACAGATCGAAATCTTAATACTTCATTTTTTGATCCTGCAGGAGGTGGAGATCCTATTTTATATCAA------

AM231423_W329_gigantea_Uzb_Chatkal ACACTATATTTTATTTTTGGTATTTGAGCAGGTATAGTAGGAACCTCTTTAAGATTATTAATTCGTACTGAATTAGGTAATCCTGGATCTTTAATTGGAGATGATCAAATTTATAATACTATTGTAACAGCTCATGCTTTTATTATAATTTTTTTTATAGTTATACCAATTATAATTGGAGGATTTGGAAATTGATTAATTCCTTTAATATTAGGAGCCCCAGATATAGCTTTTCCTCGAATAAATAATATAAGATTTTGATTATTACCCCCTTCATTAACTTTATTAATTTCTAGAAGAATTG????????????????????GGATGAACAGTTTATCCCCCTTTATCATCTAATATCGCTCATAGAGGTAGTTCAGTTGATTTAGCTATTTTTTCTTTACATTTAGCAGGAATTTCATCAATCTTAGGAGCTATTAATTTTATTACAACTATTATTAATATACGAATTAATCATATATCATTTGATCAAATACCTCTCTTTGTATGAGCAGTAGGAATTACTGCTTTACTTTTATTACTATCTTTACCTGTATTAGCTGGTGCTATTACTATATTATTAACAGATCGAAATCTTAATACTTCATTTTTTGATCCTGCAGGAGGTGGAGATCCTATTTTATATCAA------

AM231422_W330_orientalis_Zailijskiy ACACTATATTTTATTTTTGGTATTTGAGCAGGTATAGTAGGAACCTCTTTAAGATTATTAATTCGTACTGAATTAGGTAATCCTGGATCTTTAATTGGAGATGATCAAATTTATAATACTATTGTAACAGCTCATGCTTTTATTATAATTTTTTTTATAGTTATACCAATTATAATTGGAGGATTTGGAAATTGATTAATTCCTTTAATATTAGGGGCCCCAGATATAGCTTTTCCTCGAATAAATAATATAAGATTTTGATTATTACCCCCTTCATTAACTTTATTAATTTCTAGAAGAATTGTAGAAAATGGAGCAGGAACAGGATGAACAGTTTATCCCCCTTTATCATCTAATATCGCTCATAGAGGTAGTTCAGTTGATTTAGCTATTTTTTCTTTACATTTAGCGGGAATTTCATCAATCTTAGGAGCTATTAATTTTATTACAACTATTATTAATATACGAATTAATCATATATCATTTGATCAAATACCTCTCTTTGTATGAGCAGTAGGAATTACTGCTTTACTTTTATTACTATCTTTACCTGTATTAGCTGGTGCTATTACTATATTATTAACAGATCGAAATCTTAATACTTCATTTTTTGATCCTGCAGGAGGTGGAGATCCTATTTTATATCAA------

AM231421_W292_ochracea_Tadj_Zeravsh_ ACACTATATTTTATTTTTGGTATTTGAGCAGGTATAGTAGGAACCTCTTTAAGATTATTAATTCGTACTGAATTAGGTAATCCTGGATCTTTAATTGGAGATGATCAAATTTATAATACTATTGTAACAGCTCATGCTTTTATTATAATTTTTTTCATAGTTATACCAATTATAATTGGAGGATTTGGAAATTGATTAATTCCTTTAATATTAGGAGCCCCAGATATAGCTTTTCCTCGAATAAATAATATAAGATTTTGATTACTACCCCCTTCATTAACTTTATTAATTTCCAGAAGAATTGTAGAAAATGGAGCAGGAACAGGATGAACAGTTTATCCCCCTTTATCATCTAATATCGCTCATAGAGGTAGTTCAGTTGATTTAGCTATTTTTTCTTTACATTTAGCAGGAATTTCATCAATTTTAGGAGCTATTAATTTCATTACAACTATTATTAATATACGAATTAACCATATATCATTTGATCAAATACCCCTCTTTGTATGAGCAGTAGGAATTACTGCTTTACTTTTATTATTATCTTTACCTGTATTAGCTGGTGCTATTACTATATTATTAACAGATCGAAATCTTAATACTTCATTTTTTGATCCTGCAGG??GTGGAGATCCTATTTTATATCAA------

AM231420_W280_farsica_Iran_Fars ACACTATATTTTATTTTCGGTATTTGAGCAGGTATAGTAGGAACCTCTTTAAGATTATTAATTCGTACTGAATTAGGTAATCCTGGATCTTTAATTGGAGATGATCAAATTTATAATACTATTGTAACAGCTCATGCTTTTATTATAATCTTTTTTATAGTTATACCAATTATAATTGGAGGATTTGGAAATTGATTAATTCCTTTAATATTAGGAGCTCCAGATATAGCTTTCCCCCGAATAAATAATATAAGATTTTGATTACTCCCCCCCTCATTAACTTTATTAATTTCTAGAAGAATTGTAGAAAATGGAGCAGGAACAGGATGAACAGTTTACCCCCCTTTATCATCTAATATTGCCCACAGAGGTAGTTCAGTTGATTTAGCTATTTTTTCTTTACATTTAGCAGGAATTTCATCAATTTTAGGAGCTATTAATTTTATTACAACTATTATTAATATACGAATTAATTATATATCATTTGATCAAATACCTCTTTTTGTATGAGCAGTAGGAATTACAGCATTACTTTTATTATTATCTTTACCTGTATTAGCTGGTGCTATTACTATATTATTAACAGATCGAAATCTTAACACTTCATTTTTTGATCCTGCA????GTGGGGATCCTATTTTATATCAA------

AM231419_W311_pseudonubilosus_Iran_Urmia ACACTATATTTTATTTTCGGTATTTGAGCGGGTATAGTAGGAACCTCTTTAAGATTATTAATTCGTACTGAATTAGGTAATCCTGGATCTTTAATTGGAGATGATCAAATTTATAACACTATTGTAACAGCTCATGCTTTTATTATAATTTTTTTTATAGTTATACCAATTATAATTGGAGGATTTGGAAATTGATTAATTCCTTTAATATTAGGAGCTCCAGATATAGCTTTTCCTCGAATAAATAATATAAGATTTTGATTACTCCCCCCCTCATTAACTTTATTAATTTCTAGAAGAATTGTAGAAAATGGAGCAGGAACAGGATGAACAATTTATCCCCCTTTATCATCTAATATTGCTCATAGAGGTAGTTCAGTTGATTTAGCTATTTTTTCTTTACATTTAGCAGGAATTTCATCAATCTTAGGAGCTATTAATTTTATTACAACTATTATTAACATACGAATTAATCATATATCATTTGATCAAATACCTCTTTTTGTATGAGCAGTAGGAATTACTGCATTACTTTTATTATTATCTTTACCTGTATTAGCTGGTGCTATTACTATATTATTAACAGATCGAAATCTTAATACTTCATTTTTTGATCCTGCAGGA?GTGGAGATCCTATTTTATATCAA------

AM231418_W335_sheljuzhkoi_Tur_Adana ACACTATATTTTATTTTTGGTATTTGAGCAGGTATAGTAGGAACCTCTTTAAGATTATTAATTCGTACTGAATTAGGTAATCCTGGATCTTTAATTAGAGATGATCAAATTTATAATACTATTGTAACAGCTCATGCTTTTATTATAATTTTTTTTATAGTTATACCAATTATAATTGGAGGATTTGGAAATTGATTAATTCCTTTAATATTAGGAGCCCCAGATATAGCTTTTCCTCGAATAAATAATATAAGATTTTGATTACTTCCCCCTTCATTAACTTTATTAATTTCTAGAAGAATTG????????????????????GGATGAACAGTTTATCCCCCTTTATCATCTAATATTGCTCATAGAGGTAGTTCAGTTGATTTAGCTATTTTTTCTTTACATTTAGCAGGAATTTCATCAATCTTAGGAGCTATTAATTTTATTACAACTATTATTAATATACGAATTAATAATATATCATTTGATCAAATACCTCTTTTTGTATGAGCAGTAGGAATTACTGCATTACTTTTATTATTATCCCTACCTGTATTAGCTGGTGCTATTACTATATTATTAACAGATCGAAATCTTAATACTTCATTTTTTGATCCCGCAGGAGGTGGAGATCCTATTTTATATCAA------

AM231417_W78_parmenides_Fr ACATTATATTTTATTTTTGGTATTTGAGCAGGTATAGTAGGAACCTCTTTAAGATTATTAATTCGTACTGAATTAGGTAATCCTGGATCTTTAATTGGAGATGATCAAATTTATAATACTATTGTAACAGCTCATGCTTTTATTATAATTTTTTTTATAGTTATACCAATTATAATTGGAGGATTTGGAAATTGATTAATTCCTTTAATATTAGGAGCCCCAGATATAGCTTTCCCCCGAATAAATAATATAAGATTTTGATTACTACCCCCTTCATTAACCTTATTAATTTCTAGAAGAATTGTAGAAAATGGAGCAGGAACTGGATGAACAGTTTACCCCCCTTTATCATCTAATATTGCTCATAGAGGAAGTTCAGTTGATTTAGCTATTTTTTCCTTACATTTAGCAGGAATTTCATCAATCTTAGGAGCTATTAATTTTATTACAACTATTATTAATATACGAATTAATCATATATCATTCGATCAAATACCTCTTTTTGTATGAGCAGTAGGAATTACTGCTTTACTCTTATTATTATCATTACCTGTATTAGCTGGTGCTATTACTATATTATTAACAGATCGAAATCTTAATACTTCATTTTTTGATCCAGCAGGGGGTGGTGATCCTATTTTATATCAA------

EU836682_h_1_32_Rus ------------------------------------------------------------------------------------------------------------------------------------------------------------------------------------------------------------------------------------GCTTTTCCTCGAATAAATAATATAAGATTTTGATTACTACCCCCCTCATTAACTTTATTAATTTCTAGAAGAATTGTAGAAAATGGAGCAGGAACAGGATGAACAGTTTATCCCCCTTTATCATCTAATATCGCTCATAGAGGTAGTTCAGTTGATTTAGCTATTTTTTCTTTACATTTAGCAGGAATTTCATCAATCTTAGGAGCTATTAATTTTATTACAACTATTATTAATATACGAATTAACCATATATCATTTGATCAAATACCTCTCTTTGTATGAGCAGTAGGAATTACTGCTTTACTTTTATTATTATCTTTACCTGTATTAGCTGGTGCTATTACTATATTATTAACAGATCGAAATCTTAATACTTCATTTTTTGATCCTGCAGGAGGTGGGGATCCTATTTTATATCAACATTTA

EU836681_h_1_31_Rus ------------------------------------------------------------------------------------------------------------------------------------------------------------------------------------------------------------------------------------GCTTTTCCTCGAATAAATAATATAAGATTTTGATTACTACCCCCCTCATTAACTTTATTAATTTCTAGAAGAATTGTAGAAAATGGAGCAGGAACAGGATGAACAATTTATCCCCCTTTATCATCTAATATCGCTCATAGAGGTAGTTCAGTTGATTTAGCTATTTTTTCTTTACATTTAGCAGGAATTTCATCAATCTTAGGAGCTATTAATTTTATTACAACTATTATTAATATACGAATTAACCATATATCATTTGATCAAATACCTCTCTTTGTATGAGCAGTAGGAATTACTGCTTTACTTTTATTATTATCTTTACCTGTATTAGCTGGTGCTATTACTATATTATTAACAGATCGAAATCTTAATACTTCATTTTTTGATCCTGCAGGAGGTGGGGATCCTATTTTATATCAACATTTA

EU836680_A_Bo_Bu_Cr_Cz_Hu_Sl_Li_Fi_Po_Ru ------------------------------------------------------------------------------------------------------------------------------------------------------------------------------------------------------------------------------------GCTTTTCCTCGAATAAATAATATAAGATTTTGATTACTACCCCCCTCATTAACTTTATTAATTTCTAGAAGAATTGTAGAAAATGGAGCAGGAACAGGATGAACAGTTTATCCCCCTTTATCATCTAATATCGCTCATAGAGGTAGTTCAGTTGATTTAGCTATTTTTTCTTTACATTTAGCAGGAATTTCATCAATCTTAGGAGCTATTAATTTTATTACAACTATTATTAATATACGAATTAACCATATATCATTTGATCAAATACCTCTCTTTGTATGAGCAGTAGGAATTACTGCTTTACTTTTATTATTATCTTTACCTGTATTAGCTGGTGCTATTACTATATTATTAACAGATCGAAATCTTAATACTTCATTTTTTGATCCTGCAGGAGGTGGAGATCCTATTTTATATCAACATTTA

EU836675_h_1_19_It ------------------------------------------------------------------------------------------------------------------------------------------------------------------------------------------------------------------------------------GCTTTCCCTCGAATAAATAATATAAGATTTTGATTACTACCCCCCTCATTAACTTTATTAATTTCTAGAAGAATTGTAGAAAATGGAGCAGGAACAGGATGAACAGTTTATCCCCCTTTATCATCTAATATTGCTCATAGAGGTAGTTCAGTTGATTTAGCTATTTTTTCTTTACATTTAGCAGGAATTTCATCAATCTTAGGAGCTATTAATTTTATTACAACTATTATTAATATACGAATTAACCATATATCATTTGATCAAATACCTCTCTTTGTATGAGCAGTAGGAATTACTGCTTTACTTTTATTATTATCTTTACCTGTATTAGCTGGTGCTATTACTATATTATTAACAGATCGAAATCTTAATACTTCATTTTTTGATCCTGCAGGAGGTGGAGATCCTATTTTATATCAACATTTA

EU836674_h_1_18_At_It ------------------------------------------------------------------------------------------------------------------------------------------------------------------------------------------------------------------------------------GCTTTTCCTCGAATAAATAATATAAGATTTTGATTACTACCCCCCTCATTAACTTTATTAATTTCTAGAAGAATTGTAGAAAATGGAGCAGGAACAGGATGAACAGTTTATCCCCCTTTATCATCTAATATTGCTCATAGAGGTAGTTCAGTTGATTTAGCTATTTTTTCTTTACATTTAGCAGGAATTTCATCAATCTTAGGAGCTATTAATTTTATTACAACTATTATTAATATACGAATTAACCATATATCATTTGATCAAATACCTCTCTTTGTATGAGCAGTAGGAATTACTGCTTTACTTTTATTATTATCTTTACCTGTATTAGCTGGTGCTATTACTATATTATTAACAGATCGAAATCTTAATACTTCATTTTTTGATCCTGCAGGAGGTGGAGATCCTATTTTATATCAACATTTA

EU836672_h_1_10_It ------------------------------------------------------------------------------------------------------------------------------------------------------------------------------------------------------------------------------------GCTTTCCCTCGAATAAATAATATAAGATTTTGATTACTACCCCCCTCATTAACTTTATTAATTTCTAGAAGAATTGTAGAAAATGGGGCAGGAACAGGATGAACAGTTTATCCCCCTTTATCATCTAATATCGCTCATAGAGGTAGTTCAGTTGATTTAGCTATTTTTTCTTTACATTTAGCAGGAATTTCATCAATCTTAGGAGCTATTAATTTTATTACAACTATTATTAATATACGAATTAACCATATATCATTTGATCAAATACCTCTCTTTGTATGAGCAGTAGGAATTACTGCTTTACTTTTATTATTATCTTTACCTGTATTAGCTGGTGCTATTACTATATTATTAACAGATCGAAATCTTAATACTTCATTTTTTGATCCTGCAGGAGGTGGAGATCCTATTTTATATCAACATTTA

EU836671_h_1_09_It ------------------------------------------------------------------------------------------------------------------------------------------------------------------------------------------------------------------------------------GCTTTTCCTCGAATAAATAATATAAGATTTTGATTACTACCCCCCTCATTAACTTTATTAATTTCTAGAAGAATTGTAGAAAATGGGGCAGGAACAGGATGAACAGTTTATCCCCCTTTATCATCTAATATCGCTCATAGAGGTAGTTCAGTTGATTTAGCTATTTTTTCTTTACATTTAGCAGGAATTTCATCAATCTTAGGAGCTATTAATTTTATTACAACTATTATTAATATACGAATTAACCATATATCATTTGATCAAATACCTCTCTTTGTATGAGCAGTAGGAATTACTGCTTTACTTTTATTATTATCTTTACCTGTATTAGCTGGTGCTATTACTATATTATTAACAGATCGAAATCTTAATACTTCATTTTTTGATCCTGCAGGAGGTGGAGATCCTATTTTATATCAACATTTA

EU836670_h_1_07_Gre ------------------------------------------------------------------------------------------------------------------------------------------------------------------------------------------------------------------------------------GCTTTTCCTCGAATAAATAATATAAGATTTTGATTACTACCCCCCTCATTAACTTTATTAATTTCTAGAAGAATTGTAGAAAATGGAGCAGGAACAGGATGAACAATTTATCCCCCTTTATCATCTAATATCGCTCATAGAGGTAGTTCAGTTGATTTAGCTATTTTTTCTTTACATTTAGCAGGAATTTCATCAATCTTAGGGGCTATTAATTTTATTACAACTATTATTAATATACGAATTAACCATATATCATTTGATCAAATACCTCTCTTTGTATGAGCAGTAGGAATTACTGCTTTACTTTTATTATTATCTTTACCTGTATTAGCTGGTGCTATTACTATATTATTAACAGATCGAAATCTTAATACTTCATTTTTTGATCCTGCAGGAGGTGGAGATCCTATTTTATATCAACATTTA

EU836669_h_1_06_Gre ------------------------------------------------------------------------------------------------------------------------------------------------------------------------------------------------------------------------------------GCTTTCCCTCGAATAAATAATATAAGATTTTGATTACTACCCCCCTCATTAACTTTATTAATTTCTAGAAGAATTGTAGAAAATGGAGCAGGAACAGGATGAACAGTTTATCCCCCTTTATCATCTAATATAGCTCATAGAGGTAGTTCAGTTGATTTAGCTATTTTTTCTTTACATTTAGCAGGAATTTCATCAATCTTAGGAGCTATTAATTTTATTACAACTATTATTAATATACGAATTAACCATATATCATTTGATCAAATACCTCTCTTTGTATGAGCAGTAGGAATTACTGCTTTACTTTTATTATTATCTTTACCTGTATTAGCTGGTGCTATTACTATATTATTAACAGATCGAAATCTTAATACTTCATTTTTTGATCCTGCAGGAGGTGGAGATCCTATTTTATATCAACATTTA

EU836668_h_1_05_Gre ------------------------------------------------------------------------------------------------------------------------------------------------------------------------------------------------------------------------------------GCTTTCCCTCGAATAAATAATATAAGATTTTGATTACTACCCCCCTCATTAACTTTATTAATTTCTAGAAGAATTGTAGAAAATGGAGCAGGAACAGGATGAACAGTTTATCCCCCTTTATCATCTAATATCGCTCATAGAGGTAGTTCAGTTGATTTAGCTATTTTTTCTTTACATTTAGCAGGAATTTCATCAATCTTAGGGGCTATTAATTTTATTACAACTATTATTAATATACGAATTAACCATATATCATTTGATCAAATACCTCTCTTTGTATGAGCAGTAGGAATTACTGCTTTACTTTTATTATTATCTTTACCTGTATTAGCTGGTGCTATTACTATATTATTAACAGATCGAAATCTTAATACTTCATTTTTTGATCCTGCAGGAGGTGGAGATCCTATTTTATATCAACATTTA

EU836667_h_1_04_Gre ------------------------------------------------------------------------------------------------------------------------------------------------------------------------------------------------------------------------------------GCTTTCCCTCGAATAAATAATATAAGATTTTGATTACTACCCCCCTCATTAACTTTATTAATTTCTAGAAGAATTGTAGAAAATGGAGCAGGAACAGGATGAACAGTTTATCCCCCTTTATCATCTAATATCGCTCATAGAGGTAGTTCAGTTGATTTAGCTATTTTTTCTTTACATTTAGCAGGAATTTCATCAATCTTAGGGGCTATTAATTTTATTACAACTATTATTAATATACGAATTAACCATATATCATTTGATCAAATACCTCTCTTTGTATGAGCAGTAGGAATTACTGCTTTACTTTTATTATTATCTTTACCCGTATTAGCTGGTGCTATTACTATATTATTAACAGATCGAAATCTTAATACTTCATTTTTTGATCCTGCAGGAGGTGGAGATCCTATTTTATATCAACATTTA

EU836666_h_1_03_Mac ------------------------------------------------------------------------------------------------------------------------------------------------------------------------------------------------------------------------------------GCTTTTCCTCGAATAAATAATATAAGATTTTGATTACTACCCCCCTCATTAACTTTATTAATTTCTAGAAGAATTGTAGAAAATGGAGCAGGAACAGGATGAACAGTTTATCCCCCTTTATCATCTAATATCGCTCATAGAGGTAGTTCAGTTGATTTAGCTATTTTTTCTTTACATTTAGCGGGAATTTCATCAATCTTAGGGGCTATTAATTTTATTACAACTATTATTAATATACGAATTAACCATATATCATTTGATCAAATACCTCTCTTTGTATGAGCAGTAGGAATTACTGCTTTACTTTTATTATTATCTTTACCTGTATTAGCTGGTGCTATTACTATATTATTAACAGATCGAAATCTTAATACTTCATTTTTTGATCCTGCAGGAGGTGGAGATCCTATTTTATATCAACATTTA

EU836665_h_1_02_Gre_Mac ------------------------------------------------------------------------------------------------------------------------------------------------------------------------------------------------------------------------------------GCTTTTCCTCGAATAAATAATATAAGATTTTGATTACTACCCCCCTCATTAACTTTATTAATTTCTAGAAGAATTGTAGAAAATGGAGCAGGAACAGGATGAACAGTTTATCCCCCTTTATCATCTAATATCGCTCATAGAGGTAGTTCAGTTGATTTAGCTATTTTTTCTTTACATTTAGCAGGAATTTCATCAATCTTAGGGGCTATTAATTTTATTACAACTATTATTAATATACGAATTAACCATATATCATTTGATCAAATACCTCTCTTTGTATGAGCAGTAGGAATTACTGCTTTACTTTTATTATTATCTTTACCTGTATTAGCTGGTGCTATTACTATATTATTAACAGATCGAAATCTTAATACTTCATTTTTTGATCCTGCAGGAGGTGGAGATCCTATTTTATATCAACATTTA

EU836664_h_2_06_At_It ------------------------------------------------------------------------------------------------------------------------------------------------------------------------------------------------------------------------------------GCTTTTCCTCGAATAAATAATATAAGATTTTGATTGCTACCCCCCTCATTAACTTTATTAATTTCTAGAAGAATTGTAGAAAATGGAGCAGGAACAGGATGAACAGTTTATCCCCCTTTATCATCTAATATCGCTCATAGAGGTAGTTCAGTTGATTTAGCTATTTTTTCTTTACATTTAGCAGGAATTTCATCAATCTTAGGAGCTATTAATTTTATTACAACTATTATTAATATACGAATTAACCATATATCATTTGATCAAATACCTCTCTTTGTATGAGCAGTAGGAATTACTGCTTTACTTTTATTATTATCTTTACCTGTATTAGCTGGTGCTATTACTATATTATTAACAGATCGAAATCTTAATACTTCATTTTTTGATCCTGCAGGAGGTGGAGATCCTATTTTATATCAACATTTA

EU836663_h_2_05_It ------------------------------------------------------------------------------------------------------------------------------------------------------------------------------------------------------------------------------------GCTTTCCCTCGAATAAATAATATAAGATTTTGATTGCTACCCCCCTCATTAACTTTATTAATTTCTAGAAGAATTGTAGAAAATGGAGCAGGAACAGGATGAACAGTTTATCCCCCTTTATCATCTAATATCGCTCATAGAGGTAGTTCAGTTGATTTAGCTATTTTTTCTTTACATTTAGCAGGAATTTCATCAATCTTAGGAGCTATTAATTTTATTACAACTATTATTAATATACGAATTAACCATATATCATTTGATCAAATACCTCTCTTTGTATGAGCAGTAGGAATTACTGCTTTACTTTTATTATTATCTTTACCTGTATTAGCTGGTGCTATTACTATATTATTAACAGATCGAAATCTTAATACTTCATTTTTTGATCCTGCAGGAGGTGGAGATCCTATTTTATATCAACATTTA;

END;

begin mrbayes;

set autoclose=yes nowarn=yes;

partition ancstates = 2: 1, 2-655;

set partition=ancstates;

lset applyto=(2) rates=invgamma nst=6;

unlink statefreq=(all) revmat=(all) shape=(all) pinvar=(all);

prset ratepr=variable;

constraint mnemosyne_clade=LOWAM001_Kyrgyzstan_Alai_10 LOWAM004_Uzbekistan_Gissar_38 LOWAM007_Kyrgyzstan_TianShan24 LOWAM009_Kyrgyzstan_TianShan_6 LOWAM013_Turkey_Georgia_3 LOWAM014_Turkey_Ovitdagi_1 LOWAM015_Don_Borisovka_Saratov LOWAM018_Kyrgyzstan_Karamyk LOWAM019_Kyrgyzstan_Karamyk LOWAM021_Russia_Saratov LOWAM023_Saratov_Luga_Vologda_4 LOWAM027_Kazakhstan_Karatau_2 LOWAM037_Russia_Pskovskaya LOWAM038_Kyrgyzstan_Tjuz_Ashu_3 LOWAM039_Kyrgyzstan_23 LOWAM044_Russia_Borisovra_3 LOWAM045_Tajikistan_Shakhristan_3 LOWAM067_Kazakhstan_Kaindy_1 LOWAM069_Russia_Teberda_2 LOWAM073_Kyrgyzstan_Takhtalyk1 LOWAM074_Kyrgyzstan_Naryntoo LOWAM086_Turkmenistan_3 LOWAM087_Uzbekistan_Sarchashma LOWAM095_Kyrgyzstan_Sosnovka LOWAM096_Gissar_5 LOWAM098_Tajikistan_Khondiza1 LOWAM099_Uzbekistan_Kamchik_2 LOWAM100_Kyrgyzstan_Konduk LOWAM115_Azerbaijan_Nyus_Nyus LOWAM116_Iran_Dizin_2 LOWAM122_Russia_Saratow_1 LOWAM136_Uzbekistan_Tamshush_1 LOWAM149_Kyrgyzstan_Songkel_1 LOWAM198_Turkey_Aladaglar_2 LOWAM213_Tajikistan_Tandukul_1 Parnassius_ariadne_ariadne Parnassius_ariadne_AC4_14 HQ004911_RV_07_C107_Romania HQ004908_RV_07_D060_Romania HQ004907_RV_08_M274_Romania HQ004902_RV_08_M361_Romania GU947642_Pmne_ITNEB01_Italy_Sicily EU093018_Ca995 EU093017_Ch892 EU093016_Tk889 EU093015_It878 EU093014_Hu875 EU093013_Sk872_Cz_Slova EU093011_Cz869 EU093010_Ru_Bosnia_Fi_Bu_Hu_Bel_Po_Rom_Ukr_ EU093009_Kz848 EU093007_Fi810 EU093004_Tu999 EU093000_Bu961 EU092998_Bu951 EU092997_Ru940 EU092996_Sp924_Fr EU092995_Sp923 EU092994_Sp921 EU092993_Sp917 EU092992_Sp916 EU092991_Fr913 EU092990_Fr911 EU092988_It639 EU092987_Fr528 EU092985_Fr525 EU092984_Fr522 EU092983_Ch765 EU092982_Pl653_Slova_Ukr EU092981_At626 EU092980_At622 EU092978_At618_At_Slo EU092977_At606_At_Cz_D_Fi_Hu_Po_Slova EU092976_At602 EU092975_D757 EU092974_D756 EU092973_D744 EU092971_Hu697_Bu_Hu EU092969_Bu775 EU092968_Bu772 EU093003_D982 DQ407769_UP_100_F AM231426_W336_parvisi_Gre AM231425_W333_angorae_Tur AM231424_W331_angorae_Tur_Ankara AM231423_W329_gigantea_Uzb_Chatkal AM231422_W330_orientalis_Zailijskiy AM231421_W292_ochracea_Tadj_Zeravsh_ AM231420_W280_farsica_Iran_Fars AM231419_W311_pseudonubilosus_Iran_Urmia AM231418_W335_sheljuzhkoi_Tur_Adana AM231417_W78_parmenides_Fr EU836682_h_1_32_Rus EU836681_h_1_31_Rus EU836680_A_Bo_Bu_Cr_Cz_Hu_Sl_Li_Fi_Po_Ru EU836675_h_1_19_It EU836674_h_1_18_At_It EU836672_h_1_10_It EU836671_h_1_09_It EU836670_h_1_07_Gre EU836669_h_1_06_Gre EU836668_h_1_05_Gre EU836667_h_1_04_Gre EU836666_h_1_03_Mac EU836665_h_1_02_Gre_Mac EU836664_h_2_06_At_It EU836663_h_2_05_It;

prset topologypr=constraints(mnemosyne_clade);

report applyto=(1) ancstates=yes;

mcmcp ngen= 100000 relburnin=yes burninfrac=0.25 printfreq=100 samplefreq=100 nchains=4 savebrlens=yes;

mcmc;

sump;

end;

**Alignment and command block for reconstruction of the ancestral states in the clade (2) [(*mnemosyne* +*ariadne*)+(*stubbendorfii*+*glacialis*+*hoenei*)]**

#NEXUS

BEGIN DATA;

DIMENSIONS NTAX=125 NCHAR=655;

format datatype=mixed(standard:1,DNA:2-655) interleave=yes gap=- missing=?;

MATRIX

Parnassius_orleans_AC10_5 0

LOWAM001_Kyrgyzstan_Alai_10 1

LOWAM004_Uzbekistan_Gissar_38 1

LOWAM007_Kyrgyzstan_TianShan24 1

LOWAM009_Kyrgyzstan_TianShan_6 1

LOWAM013_Turkey_Georgia_3 1

LOWAM014_Turkey_Ovitdagi_1 1

LOWAM015_Don_Borisovka_Saratov 1

LOWAM018_Kyrgyzstan_Karamyk 1

LOWAM019_Kyrgyzstan_Karamyk 1

LOWAM021_Russia_Saratov 1

LOWAM023_Saratov_Luga_Vologda_4 1

LOWAM027_Kazakhstan_Karatau_2 1

LOWAM037_Russia_Pskovskaya 1

LOWAM038_Kyrgyzstan_Tjuz_Ashu_3 1

LOWAM039_Kyrgyzstan_23 1

LOWAM044_Russia_Borisovra_3 1

LOWAM045_Tajikistan_Shakhristan_3 1

LOWAM067_Kazakhstan_Kaindy_1 1

LOWAM069_Russia_Teberda_2 1

LOWAM073_Kyrgyzstan_Takhtalyk1 1

LOWAM074_Kyrgyzstan_Naryntoo 1

LOWAM086_Turkmenistan_3 1

LOWAM087_Uzbekistan_Sarchashma 1

LOWAM095_Kyrgyzstan_Sosnovka 1

LOWAM096_Gissar_5 1

LOWAM098_Tajikistan_Khondiza1 1

LOWAM099_Uzbekistan_Kamchik_2 1

LOWAM100_Kyrgyzstan_Konduk 1

LOWAM115_Azerbaijan_Nyus_Nyus 1

LOWAM116_Iran_Dizin_2 1

LOWAM122_Russia_Saratow_1 1

LOWAM136_Uzbekistan_Tamshush_1 1

LOWAM149_Kyrgyzstan_Songkel_1 1

LOWAM198_Turkey_Aladaglar_2 1

LOWAM213_Tajikistan_Tandukul_1 1

Parnassius_clodius 0

Parnassius_eversmanni_2005_LOWA_108 0

Parnassius_eversmanni_2005_LOWA_107 0

Parnassius_stubbendorfii_2005_LOWA_815 1

Parnassius_stubbendorfii_2005_LOWA_154 1

Parnassius_stubbendorfii_2005_LOWA_153 1

Parnassius_nordmanni 0

Parnassius_eversmanni 0

Parnassius_eversmanni_felderi 0

Parnassius_ariadne_ariadne 0

Parnassius_glacialis_mikado 1

Parnassius_stubbendorfii_hoenei 1

Parnassius_stubbendorfii_hoenei_AC20_16 1

Parnassius_stubbendorfii_koreanus 1

Parnassius_nordmanni_AC20_5 0

Parnassius_eversmanni_felderi_AC23_68 0

Parnassius_eversmanni_eversmanni_AC1_14 0

Parnassius_clodius_AC4_5 0

Parnassius_ariadne_AC4_14 0

HQ004911_RV_07_C107_Romania 1

HQ004908_RV_07_D060_Romania 1

HQ004907_RV_08_M274_Romania 1

HQ004902_RV_08_M361_Romania 1

GU947642_Pmne_ITNEB01_Italy_Sicily 1

EU093018_Ca995 1

EU093017_Ch892 1

EU093016_Tk889 1

EU093015_It878 1

EU093014_Hu875 1

EU093013_Sk872_Cz_Slova 1

EU093011_Cz869 1

EU093010_Ru_Bosnia_Fi_Bu_Hu_Bel_Po_Rom_Ukr_ 1

EU093009_Kz848 1

EU093007_Fi810 1

EU093004_Tu999 1

EU093000_Bu961 1

EU092998_Bu951 1

EU092997_Ru940 1

EU092996_Sp924_Fr 1

EU092995_Sp923 1

EU092994_Sp921 1

EU092993_Sp917 1

EU092992_Sp916 1

EU092991_Fr913 1

EU092990_Fr911 1

EU092988_It639 1

EU092987_Fr528 1

EU092985_Fr525 1

EU092984_Fr522 1

EU092983_Ch765 1

EU092982_Pl653_Slova_Ukr 1

EU092981_At626 1

EU092980_At622 1

EU092978_At618_At_Slo 1

EU092977_At606_At_Cz_D_Fi_Hu_Po_Slova 1

EU092976_At602 1

EU092975_D757 1

EU092974_D756 1

EU092973_D744 1

EU092971_Hu697_Bu_Hu 1

EU092969_Bu775 1

EU092968_Bu772 1

EU093003_D982 1

DQ407769_UP_100_F 1

AM231426_W336_parvisi_Gre 1

AM231425_W333_angorae_Tur 1

AM231424_W331_angorae_Tur_Ankara 1

AM231423_W329_gigantea_Uzb_Chatkal 1

AM231422_W330_orientalis_Zailijskiy 1

AM231421_W292_ochracea_Tadj_Zeravsh_ 1

AM231420_W280_farsica_Iran_Fars 1

AM231419_W311_pseudonubilosus_Iran_Urmia 1

AM231418_W335_sheljuzhkoi_Tur_Adana 1

AM231417_W78_parmenides_Fr 1

EU836682_h_1_32_Rus 1

EU836681_h_1_31_Rus 1

EU836680_A_Bo_Bu_Cr_Cz_Hu_Sl_Li_Fi_Po_Ru 1

EU836675_h_1_19_It 1

EU836674_h_1_18_At_It 1

EU836672_h_1_10_It 1

EU836671_h_1_09_It 1

EU836670_h_1_07_Gre 1

EU836669_h_1_06_Gre 1

EU836668_h_1_05_Gre 1

EU836667_h_1_04_Gre 1

EU836666_h_1_03_Mac 1

EU836665_h_1_02_Gre_Mac 1

EU836664_h_2_06_At_It 1

EU836663_h_2_05_It 1

Parnassius_orleans_AC10_5 ------------------------TGAGCAGGTATAATAGGAACCTCTTTAAGATTATTAATTCGTACTGAATTAGGTAATCCTGGATCTTTAATTGGAGATGATCAAATTTATAACACTATTGTAACAGCTCATGCTTTTATTATAATTTTTTTTATAGTTATACCAATTATAATTGGAGGATTTGGAAATTGATTAATTCCATTAATATTAGGAGCCCCAGATATAGCTTTCCCCCGAATAAATAATATAAGATTTTGACTATTACCCCCCTCATTAACCTTATTAATTTCCAGAAGAATCGTAGAAAATGGAGCAGGAACTGGATGAACAGTTTATCCCCCTTTATCCTCTAATATTGCCCATAGTGGAAGATCAGTTGATTTAGCTATCTTTTCTTTACATTTAGCTGGAATTTCATCTATTTTAGGAGCTATTAATTTTATTACAACTATTATTAATATACGAATTAATCATATATCATTTGATCAAATACCCCTTTTCGTATGAGCAGTAGGAATTACTGCTTTACTTTTATTATTATCTTTACCTGTTTTAGCAGGTGCTATTACTATACTTCTTACAGATCGAAATCTTAATACTTCATTTTTTGATCCAGCAGGAGGTGGAGATCCTATTTTATACCAACATTTA

LOWAM001_Kyrgyzstan_Alai_10 ACACTATATTTTATTTTTGGTATTTGAGCAGGTATAGTAGGAACCTCTTTAAGATTATTAATTCGTACTGAATTAGGTAATCCTGGATCTTTAATTGGAGATGATCAAATTTATAATACTATTGTAACAGCTCATGCTTTTATTATAATTTTTTTCATAGTTATACCAATTATAATTGGAGGATTTGGAAATTGATTAATTCCTTTAATATTAGGAGCCCCAGATATAGCTTTTCCTCGAATAAATAATATAAGATTTTGATTACTACCCCCTTCATTAACTTTATTAATTTCTAGAAGAATTGTAGAAAATGGAGCAGGAACAGGATGAACAGTTTATCCCCCTTTATCATCTAATATCGCTCATAGAGGTAGTTCAGTTGATTTAGCTATTTTTTCTTTACATTTAGCAGGAATTTCATCAATTTTAGGAGCTATTAATTTCATTACAACTATTATTAATATACGAATTAACCATATATCATTTGATCAAATACCCCTCTTTGTATGAGCAGTAGGAATTACTGCTTTACTTTTATTATTATCTTTACCTGTATTAGCTGGTGCTATTACTATATTATTAACAGATCGAAATCTTAATACTTCATTTTTTGATCCTGCAGGAGGTGGAGATCCTATTTTATATCAACATTTA

LOWAM004_Uzbekistan_Gissar_38 ACACTATATTTTATTTTTGGTATTTGAGCAGGTATAGTAGGAACCTCTTTAAGATTATTAATTCGTACTGAATTAGGTAATCCTGGATCTTTAATTGGAGATGATCAAATTTATAATACTATTGTAACAGCTCATGCTTTTATTATAATTTTTTTCATAGTTATACCAATTATAATTGGAGGATTTGGAAATTGATTAATTCCTTTAATATTAGGAGCCCCAGATATAGCTTTTCCTCGAATAAATAATATAAGATTTTGATTACTACCCCCTTCATTAACTTTATTAATTTCCAGAAGAATTGTAGAAAATGGAGCAGGAACAGGATGAACAGTTTATCCCCCTTTATCATCTAATATCGCTCATAGAGGTAGTTCAGTTGATTTAGCTATTTTTTCTTTACATTTAGCAGGAATTTCATCAATTTTAGGAGCTATTAATTTCATTACAACTATTATTAATATACGAATTAACCATATATCATTTGATCAAATACCCCTCTTTGTATGAGCAGTAGGAATTACTGCTTTACTTTTATTATTATCTTTACCTGTATTAGCTGGTGCTATTACTATATTATTAACAGATCGAAATCTTAATACTTCATTTTTTGATCCTGCAGGAGGTGGAGATCCTATTTTATATCAACATTTA

LOWAM007_Kyrgyzstan_TianShan24 ACACTATATTTTATTTTTGGTATTTGAGCAGGTATAGTAGGAACCTCTTTAAGATTATTAATTCGTACTGAATTAGGTAATCCTGGATCTTTAATTGGAGATGATCAAATTTATAATACTATTGTAACAGCTCATGCTTTTATTATAATTTTTTTTATAGTTATACCAATTATAATTGGAGGATTTGGAAATTGATTAATTCCTTTAATATTAGGGGCCCCAGATATAGCTTTTCCTCGAATAAATAATATAAGATTTTGATTATTACCCCCTTCATTAACTTTATTAATTTCTAGAAGAATTGTAGAAAATGGAGCAGGAACAGGATGAACAGTTTATCCCCCTTTATCATCTAATATCGCTCATAGAGGTAGTTCAGTTGATTTAGCTATTTTTTCTTTACATTTAGCAGGAATTTCATCAATCTTAGGAGCTATTAATTTTATTACAACTATTATTAATATACGAATTAATCATATATCATTTGATCAAATACCTCTCTTTGTATGAGCAGTAGGAATTACTGCTTTACTTTTATTACTATCTTTACCTGTATTAGCTGGTGCTATTACTATATTATTAACAGATCGAAATCTTAATACTTCATTTTTTGATCCTGCAGGAGGTGGAGATCCTATTTTATATCAACATTTA

LOWAM009_Kyrgyzstan_TianShan_6 ACACTATATTTTATTTTTGGTATTTGAGCAGGTATAGTAGGAACCTCTTTAAGATTATTAATTCGTACTGAATTAGGTAATCCTGGATCTTTGATTGGAGATGATCAAATTTATAATACTATTGTAACAGCTCATGCTTTTATTATAATTTTTTTTATAGTTATACCAATTATAATTGGAGGATTTGGAAATTGATTAATTCCTTTAATATTAGGGGCCCCAGATATAGCTTTTCCTCGAATAAATAATATAAGATTTTGATTATTACCCCCTTCATTAACTTTATTAATTTCTAGAAGAATTGTAGAAAATGGAGCAGGAACAGGATGAACAGTTTATCCCCCTTTATCATCTAATATCGCTCATAGAGGTAGTTCAGTTGATTTAGCTATTTTTTCTTTACATTTAGCAGGAATTTCATCAATCTTAGGAGCTATTAATTTTATTACAACTATTATTAATATACGAATTAATCATATATCATTTGATCAAATACCTCTCTTTGTATGAGCAGTAGGAATTACTGCTTTACTTTTATTACTATCTTTACCTGTATTAGCTGGTGCTATTACTATATTATTAACAGATCGAAATCTTAATACTTCATTTTTTGATCCTGCAGGAGGTGGAGATCCTATTTTATATCAACATTTA

LOWAM013_Turkey_Georgia_3 ACACTATATTTTATTTTTGGTATTTGAGCAGGTATAGTAGGAACCTCTTTAAGATTATTAATTCGTACTGAATTAGGTAATCCTGGATCTTTAATTGGAGATGATCAAATTTATAATACTATTGTAACAGCTCATGCTTTTATTATAATTTTTTTTATAGTTATACCAATTATAATTGGAGGATTTGGAAATTGATTAATTCCTTTAATATTAGGAGCCCCAGATATAGCTTTTCCTCGAATAAATAATATAAGATTTTGATTACTGCCCCCCTCATTAACTTTATTAATTTCTAGAAGAATTGTAGAAAATGGAGCAGGAACAGGATGAACAGTTTATCCCCCTTTATCATCTAATATCGCTCATAGAGGTAGTTCAGTTGATTTAGCTATTTTTTCTTTACATTTAGCAGGAATTTCATCAATCTTAGGAGCTATTAATTTTATTACAACTATTATTAATATACGAATTAACCATATATCATTTGATCAAATACCTCTCTTTGTATGAGCAGTAGGAATTACTGCTTTACTTTTATTATTATCTTTACCTGTATTAGCTGGTGCTATTACTATATTATTAACAGATCGAAATCTTAATACTTCATTTTTTGATCCTGCAGGAGGTGGAGATCCTATTTTATATCAACATTTA

LOWAM014_Turkey_Ovitdagi_1 ACACTATATTTTATTTTTGGTATTTGAGCAGGTATAGTAGGAACCTCTTTAAGATTATTAATTCGTACTGAATTAGGTAATCCTGGATCTTTAATTGGAGATGATCAAATTTATAATACTATTGTAACAGCTCATGCTTTTATTATAATTTTTTTTATAGTTATACCAATTATAATTGGAGGATTTGGAAATTGATTAATTCCTTTAATATTAGGAGCCCCAGATATAGCTTTTCCTCGAATAAATAATATAAGATTTTGATTACTGCCCCCCTCATTAACTTTATTAATTTCCAGAAGAATTGTAGAAAATGGAGCAGGAACAGGATGAACAGTTTATCCCCCTTTATCATCTAATATCGCTCATAGAGGTAGTTCAGTTGATTTAGCTATTTTTTCTTTACATTTAGCAGGAATTTCATCAATCTTAGGAGCTATTAATTTTATTACAACTATTATTAATATACGAATTAACCATATATCATTTGATCAAATACCTCTCTTTGTATGAGCAGTAGGAATTACTGCTTTACTTTTATTATTATCTTTACCTGTATTAGCTGGTGCTATTACTATATTATTAACAGATCGAAATCTTAATACTTCATTTTTTGATCCTGCAGGAGGTGGAGATCCTATTTTATATCAACATTTA

LOWAM015_Don_Borisovka_Saratov ACACTATATTTTATTTTTGGTATTTGAGCAGGTATAGTAGGAACCTCTTTAAGATTATTAATTCGTACTGAATTAGGTAATCCTGGATCTTTAATTGGAGATGATCAAATTTATAATACTATTGTAACAGCTCATGCTTTTATTATAATTTTTTTTATAGTTATACCAATTATAATTGGAGGATTTGGAAATTGATTAATTCCTTTAATATTAGGAGCCCCAGATATAGCTTTTCCTCGAATAAATAATATAAGATTTTGATTACTACCCCCCTCATTAACTTTATTAATTTCTAGAAGAATTGTAGAAAATGGAGCAGGAACAGGATGAACAGTTTATCCCCCTTTATCATCTAATATCGCTCATAGAGGTAGTTCAGTTGATTTAGCTATTTTTTCTTTACATTTAGCAGGAATTTCATCAATCTTAGGAGCTATTAATTTTATTACAACTATTATTAATATACGAATTAACCATATATCATTTGATCAAATACCTCTCTTTGTATGAGCAGTAGGAATTACTGCTTTACTTTTATTATTATCTTTACCTGTATTAGCTGGTGCTATTACTATATTATTAACAGATCGAAATCTTAATACTTCATTTTTTGATCCTGCAGGAGGTGGGGATCCTATTTTATATCAACATTTA

LOWAM018_Kyrgyzstan_Karamyk ACACTATATTTTATTTTTGGTATTTGAGCAGGTATAGTAGGAACCTCTTTAAGATTATTAATTCGTACTGAATTAGGTAATCCTGGATCTTTAATTGGAGATGATCAAATTTATAATACTATTGTAACAGCTCATGCTTTTATTATAATTTTTTTTATAGTTATACCAATTATAATTGGAGGATTTGGAAATTGATTAATTCCTTTAATATTAGGAGCCCCAGATATAGCTTTTCCTCGAATAAATAATATAAGATTTTGATTACTACCCCCTTCATTAACTTTATTAATTTCTAGAAGAATTGTAGAAAATGGAGCAGGAACAGGATGAACAGTTTATCCCCCTTTATCATCTAATATCGCTCATAGAGGTAGTTCAGTTGATTTAGCTATTTTTTCTTTACATTTAGCAGGAATTTCATCAATTTTAGGAGCTATTAATTTCATTACAACTATTATTAATATACGAATTAACCATATATCATTTGATCAAATACCCCTCTTTGTATGAGCAGTAGGAATTACTGCTTTACTTTTATTATTATCTTTACCTGTATTAGCTGGTGCTATTACTATATTATTAACAGATCGAAATCTTAATACTTCATTTTTTGATCCAGCAGGAGGTGGAGATCCTATTTTATATCAACATTTA

LOWAM019_Kyrgyzstan_Karamyk ACACTATATTTTATTTTTGGTATTTGAGCAGGTATAGTAGGAACCTCTTTAAGATTATTAATTCGTACTGAATTAGGTAATCCTGGATCTTTAATTGGAGATGATCAAATTTATAATACTATTGTAACAGCTCATGCTTTTATTATAATTTTTTTCATAGTTATACCAATTATAATTGGAGGATTTGGAAATTGATTAATTCCTTTAATATTAGGAGCCCCAGATATAGCTTTTCCTCGAATAAATAATATAAGATTTTGATTACTACCCCCTTCATTAACTTTATTAATTTCTAGAAGAATTGTAGAAAATGGAGCAGGAACAGGATGAACA?TTTATCCCCCTTTATCATCTAATATCGCTCATAGAGGTAGTTCAGTTGATTTAGCTATTTTTTCTTTACATTTAGCAGGAATTTCATCAATTTTAGGGGCTATTAATTTCATTACAACTATTATTAATATACGAATTAACCATATATCATTTGATCAAATACCCCTCTTTGTATGAGCAGTAGGAATTACTGCTTTACTTTTATTATTATCTTTACCTGTATTAGCTGGTGCTATTACTATATTATTAACAGATCGAAATCTTAATACTTCATTTTTTGATCCTGCAGGAGGTGGAGATCCTATTTTATATCAACATTTA

LOWAM021_Russia_Saratov ACACTATATTTTATTTTTGGTATTTGAGCAGGTATAGTAGGAACCTCTTTAAGATTATTAATTCGTACTGAATTAGGTAATCCTGGATCTTTAATTGGAGATGATCAAATTTATAATACTATTGTAACAGCTCATGCTTTTATTATAATTTTTTTTATAGTTATACCAATTATAATTGGAGGATTTGGAAATTGATTAATTCCTTTAATATTAGGAGCCCCAGATATAGCTTTTCCTCGAATAAATAATATAAGATTTTGATTACTACCCCCCTCATTAACTTTATTAATTTCTAGAAGAATTGTAGAAAATGGAGCAGGAACAGGATGAACAGTTTATCCCCCTTTATCATCTAATATCGCTCATAGAGGTAGTTCAGTTGATTTAGCTATTTTTTCTTTACATTTAGCAGGAATTTCATCAATCTTAGGAGCTATTAATTTTATTACAACTATTATTAATATACGAATTAACCATATATCATTTGATCAAATACCTCTCTTTGTATGAGCAGTAGGAATTACTGCTTTACTTTTATTATTATCTTTACCTGTATTAGCTGGTGCTATTACTATATTATTAACAGATCGAAATCTTAATAATTCATTTTTTGATCCTGCAGGAGGTGGGGATCCTATTTTATATCAACATTTA

LOWAM023_Saratov_Luga_Vologda_4 ACACTATATTTTATTTTTGGTATTTGAGCAGGTATAGTAGGAACCTCTTTAAGATTATTAATTCGTACTGAATTAGGTAATCCTGGATCTTTAATTGGAGATGATCAAATTTATAATACTATTGTAACAGCTCATGCTTTTATTATAATTTTTTTTATAGTTATACCAATTATAATTGGAGGATTTGGAAATTGATTAATTCCTTTAATATTAGGAGCCCCAGATATAGCTTTTCCTCGAATAAATAATATAAGATTTTGATTACTACCCCCCTCATTAACTTTATTAATTTCTAGAAGAATTGTAGAAAATGGAGCAGGAACAGGATGAACAGTTTATCCCCCTTTATCATCTAATATCGCTCATAGAGGTAGTTCAGTTGATTTAGCTATTTTTTCTTTACATTTAGCAGGAATTTCATCAATCTTAGGAGCTATTAATTTTATTACAACTATTATTAATATACGAATTAACCATATATCATTTGATCAAATACCTCTCTTTGTATGAGCAGTAGGAATTACTGCTTTACTTTTATTATTATCTTTACCTGTATTAGCTGGTGCTATTACTATATTATTAACAGATCGAAATCTTAATACTTCATTTTTTGATCCTGCAGGAGGTGGAGATCCTATTTTATATCAACATTTA

LOWAM027_Kazakhstan_Karatau_2 ACACTATATTTTATTTTTGGTATTTGAGCAGGTATAGTAGGAACCTCTTTAAGATTATTAATTCGTACTGAATTAGGTAATCCTGGATCTTTAATTGGAGATGATCAAATTTATAATACTATTGTAACAGCTCATGCTTTTATTATAATTTTTTTTATAGTTATACCAATTATAATTGGAGGATTTGGAAATTGATTAATTCCTTTAATATTAGGGGCCCCAGATATAGCTTTTCCTCGAATAAATAATATAAGATTTTGATTATTACCCCCTTCATTAACTTTATTAATTTCTAGAAGAATTGTAGAAAATGGAGCAGGAACAGGATGAACAGTTTATCCCCCTTTATCATCTAATATCGCTCATAGAGGTAGTTCAGTTGATTTAGCTATTTTTTCTTTACATTTAGCAGGAATTTCATCAATCTTAGGAGCTATTAATTTTATTACAACTATTATTAATATACGAATTAATCATATATCATTTGATCAAATACCTCTCTTTGTATGAGCAGTAGGAATTACTGCTTTACTTTTATTACTATCCTTACCTGTATTAGCTGGTGCTATTACTATATTATTAACAGATCGAAATCTTAATACTTCATTTTTTGATCCTGCAGGAGGTGGAGATCCTATTTTATATCAACATTTA

LOWAM037_Russia_Pskovskaya ---------TTTATTTTTGGTATTTGAGCAGGTATAGTAGGAACCTCTTTAAGATTATTAATTCGTACTGAATTAGGTAATCCTGGATCTTTAATTGGAGATGATCAAATTTATAATACTATTGTAACAGCTCATGCTTTTATTATAATTTTTTTTATAGTTATACCAATTATAATTGGAGGATTTGGAAATTGATTAATTCCTTTAATATTAGGAGCCCCAGATATAGCTTTTCCTCGAATAAATAATATAAGATTTTGATTACTACCCCCCTCATTAACTTTATTAATTTCTAGAAGAATTGTAGAAAATGGAGCAGGAACAGGATGAACAGTTTATCCCCCTTTATCATCTAATATCGCTCATAGAGGTAGTTCAGTTGATTTAGCTATTTTTTCTTTACATTTAGCAGGAATTTCATCAATCTTAGGAGCTATTAATTTTATTACAACTATTATTAATATACGAATTAACCATATATCATTTGATCAAATACCTCTCTTTGTATGAGCAGTAGGAATTACTGCTTTACTTTTATTATTATCTTTACCTGTATTAGCTGGTGCTATTACTATATTATTAACAGATCGAAATCTTAATACTTCATTTTTTGATCCTGCAGGAGGTGGAGATCCTATTTTATATCAACATTTA

LOWAM038_Kyrgyzstan_Tjuz_Ashu_3 ACACTATATTTTATTTTTGGTATTTGAGCAGGTATAGTAGGAACCTCTTTAAGATTATTAATTCGTACTGAATTAGGTAATCCTGGATCTTTAATTGGAGATGATCAAATTTATAATACTATTGTAACAGCTCATGCTTTTATTATAATTTTTTTTATAGTTATACCAATTATAATTGGAGGATTTGGAAATTGATTAATTCCTTTAATATTAGGGGCCCCAGATATAGCTTTTCCTCGAATAAATAATATAAGATTTTGATTATTACCCCCTTCATTAACTTTATTAATTTCTAGAAGAATTGTAGAAAATGGAGCAGGAACAGGATGAACAATTTATCCCCCTTTATCATCTAATATCGCTCATAGAGGTAGTTCAGTTGATTTAGCTATTTTTTCTTTACATTTAGCGGGAATTTCATCAATCTTAGGAGCTATTAATTTTATTACAACTATTATTAATATACGAATTAATCATATATCATTTGATCAAATACCTCTCTTTGTATGAGCAGTAGGAATTACTGCTTTACTTTTATTACTATCTTTACCTGTATTAGCTGGTGCTATTACTATATTATTAACAGATCGAAATCTTAATACTTCATTTTTTGATCCTGCAGGAGGTGGAGATCCTATTTTATATCAACATTTA

LOWAM039_Kyrgyzstan_23 ACACTATATTTTATTTTTGGTATTTGAGCAGGTATAGTAGGAACCTCTTTAAGATTATTAATTCGTACTGAATTAGGTAATCCTGGATCTTTAATTGGAGATGATCAAATTTATAATACTATTGTAACAGCTCATGCTTTTATTATAATTTTTTTTATAGTTATACCAATTATAATTGGAGGATTTGGAAATTGATTAATTCCTTTAATATTAGGGGCCCCAGATATAGCTTTTCCTCGAATAAATAATATAAGATTTTGATTATTACCCCCTTCATTAACTTTATTAATTTCTAGAAGAATTGTAGAAAATGGAGCAGGAACAGGATGAACAGTTTATCCCCCTTTATCATCTAATATCGCTCATAGAGGTAGTTCAGTTGATTTAGCTATTTTTTCTTTACATTTAGCGGGAATTTCATCAATCTTAGGAGCTATTAATTTTATTACAACTATTATTAATATACGAATTAATCATATATCATTTGATCAAATACCTCTCTTTGTATGAGCAGTAGGAATTACTGCTTTACTTTTATTACTATCTTTACCTGTATTAGCTGGTGCTATTACTATATTATTAACAGATCGAAATCTTAATACTTCATTTTTTGATCCTGCAGGAGGTGGAGATCCTATTTTATATCAACATTTA

LOWAM044_Russia_Borisovra_3 ACACTATATTTTATTTTTGGTATTTGAGCAGGTATAGTAGGAACCTCTTTAAGATTATTAATTCGTACTGAATTAGGTAATCCTGGATCTTTAATTGGAGATGATCAAATTTATAATACTATTGTAACAGCTCATGCTTTTATTATAATTTTTTTTATAGTTATACCAATTATAATTGGAGGATTTGGAAATTGATTAATTCCCTTAATATTAGGAGCCCCAGATATAGCTTTTCCTCGAATAAATAATATAAGATTTTGATTACTACCCCCCTCATTAACTTTATTAATTTCTAGAAGAATTGTAGAAAATGGAGCAGGAACAGGATGAACAGTTTATCCCCCTTTATCATCTAATATCGCTCATAGAGGTAGTTCAGTTGATTTAGCTATTTTTTCTTTACATTTAGCAGGAATTTCATCAATCTTAGGAGCTATTAATTTTATTACAACTATTATTAATATACGAATTAACCATATATCATTTGATCAAATACCTCTCTTTGTATGAGCAGTAGGAATTACTGCTTTACTTTTATTATTATCTTTACCTGTATTAGCTGGTGCTATTACTATATTATTAACAGATCGAAATCTTAATACTTCATTTTTTGATCCTGCAGGAGGTGGAGATCCTATTTTATATCAACATTTA

LOWAM045_Tajikistan_Shakhristan_3 ACACTATATTTTATTTTTGGTATTTGAGCAGGTATAGTAGGAACCTCTTTAAGATTATTAATTCGTACTGAATTAGGTAATCCTGGATCTTTAATTGGAGATGATCAAATTTATAATACTATTGTAACAGCTCATGCTTTTATTATAATTTTTTTCATAGTTATACCAATTATAATTGGAGGATTTGGAAATTGATTAATTCCTTTAATATTAGGAGCCCCAGATATAGCTTTTCCTCGAATAAATAATATAAGATTTTGATTACTACCCCCTTCATTAACTTTATTAATTTCCAGAAGAATTGTAGAAAATGGAGCAGGAACAGGATGAACAGTTTATCCCCCTTTATCATCTAATATTGCTCATAGAGGTAGTTCAGTTGATTTAGCTATTTTTTCTTTACATTTAGCAGGAATTTCATCAATTTTAGGAGCTATTAATTTCATTACAACTATTATTAATATACGAATTAACCATATATCATTTGATCAAATACCCCTCTTTGTATGAGCAGTAGGAATTACTGCTTTACTTTTATTATTATCTTTACCTGTATTAGCTGGTGCTATTACTATATTATTAACAGATCGAAATCTTAATACTTCATTTTTTGATCCTGCAGGAGGTGGAGATCCTATTTTATATCAACATTTA

LOWAM067_Kazakhstan_Kaindy_1 ACACTATATTTTATTTTTGGTATTTGAGCAGGTATAGTAGGAACCTCTTTAAGATTATTAATTCGTACTGAATTAGGTAATCCTGGATCTTTAATTGGAGATGATCAAATTTATAATACTATTGTAACAGCTCATGCTTTTATTATAATTTTTTTTATAGTTATACCAATTATAATTGGAGGATTTGGAAATTGATTAATTCCTTTAATATTAGGGGCCCCAGATATAGCTTTTCCTCGAATAAATAATATAAGATTTTGATTATTACCCCCTTCATTAACTTTATTAATTTCTAGAATAATTGTAGAAAATGGAGCAGGAACAGGATGAACAGTTTATCCCCCTTTATCATCTAATATCGCTCATAGAGGTAGTTCAGTTGATTTAGCTATTTTTTCTTTACATTTAGCGGGAATTTCATCAATCTTAGGAGCTATTAATTTTATTACAACTATTATTAATATACGAATTAATCATATATCATTTGATCAAATACCTCTCTTTGTATGAGCAGTAGGAATTACTGCTTTACTTTTATTACTATCTTTACCTGTATTAGCTGGTGCTATTACTATATTATTAACAGATCGAAATCTTAATACTTCATTTTTTGATCCTGCAGGAGGTGGAGATCCTATTTTATATCAACATTTA

LOWAM069_Russia_Teberda_2 ---------TTTATTTTTGGTATTTGAGCAGGTATAGTAGGAACCTCTTTAAGATTATTAATTCGTACTGAATTAGGTAATCCTGGATCTTTAATTGGAGATGATCAAATTTATAATACTATTGTAACAGCTCATGCTTTTATTATAATTTTTTTTATAGTTATACCAATTATAATTGGAGGATTTGGAAATTGATTAATTCCTTTAATATTAGGAGCCCCAGATATAGCTTTTCCTCGAATAAATAATATAAGATTTTGATTACTGCCCCCCTCATTAACTTTATTAATTTCTAGAAGAATTGTAGAAAATGGAGCAGGAACAGGATGAACAGTTTATCCCCCTTTATCATCTAATATCGCTCATAGAGGTAGTTCAGTTGATTTAGCTATTTTTTCTTTACATTTAGCAGGAATTTCATCAATCTTAGGAGCTATTAATTTTATTACAACTATTATTAATATACGAATTAATCATATATCATTTGATCAAATACCTCTCTTTGTATGAGCAGTAGGAATTAC?GCTTTACTTTTATTATTATCTTTACCTGTATTAGCTGG?GCTATTACTATATTATTAACAGATCGAAATCT?AATACTTCATTTTTTGATCCTGCAGGAGGAGGAGATCCTATTTTATATCAACATTTA

LOWAM073_Kyrgyzstan_Takhtalyk1 ACACTATATTTTATTTTTGGTATTTGAGCAGGTATAGTAGGAACCTCTTTAAGATTATTAATTCGTACTGAATTAGGTAATCCTGGATCTTTAATTGGAGATGATCAAATTTATAATACTATTGTAACAGCTCATGCTTTTATTATAATTTTTTTTATAGTTATACCAATTATAATTGGAGGATTTGGAAATTGATTAATTCCTTTAATATTAGGGGCCCCAGATATAGCTTTTCCTCGAATAAATAATATAAGATTTTGATTATTACCCCCTTCATTAACTTTATTAATTTCTAGAAGAATTGTAGAAAATGGAGCAGGAACAGGATGAACAGTTTATCCCCCTTTATCATCTAATATCGCTCATAGAGGTAGTTCAGTTGATTTAGCTATTTTTTCTTTACATTTAGCGGGGATTTCATCAATCTTAGGAGCTATTAATTTTATTACAACTATTATTAATATACGAATTAATCATATATCATTTGATCAAATACCTCTCTTTGTATGAGCAGTAGGAATTACTGCTTTACTTTTATTATTATCTTTACCTGTATTAGCTGGTGCTATTACTATATTATTAACAGATCGAAATCTTAATACTTCATTTTTTGATCCTGCAGGAGGTGGAGATCCTATTTTATATCAACATTTA

LOWAM074_Kyrgyzstan_Naryntoo ACACTATATTTTATTTTTGGTATTTGAGCAGGTATAGTAGGAACCTCTTTAAGATTATTAATTCGTACTGAATTAGGTAATCCTGGATCTTTAATTGGAGATGATCAAATTTATAATACTATTGTAACAGCTCATGCTTTTATTATAATTTTTTTTATAGTTATACCAATTATAATTGGAGGATTTGGAAATTGATTAATTCCTTTAATATTAGGGGCCCCAGATATAGCTTTTCCTCGAATAAATAATATAAGATTTTGATTATTACCCCCTTCATTAACTTTATTAATTTCTAGAAGAATTGTAGAAAATGGAGCAGGAACAGGATGAACAGTTTATCCCCCTTTATCATCTAATATCGCTCATAGAGGTAGTTCAGTTGATTTAGCTATTTTTTCTTTACATTTAGCGGGAATTTCATCAATCTTAGGAGCTATTAATTTTATTACAACTATTATTAATATACGAATTAATCATATATCATTTGATCAAATACCTCTCTTTGTATGAGCAGTAGGAATTACTGCTTTACTTTTATTACTATCTTTACCTGTATTAGCTGGTGCTATTACTATATTATTAACAGATCGAAATCTTAATACTTCATTTTTTGATCCTGCAGGAGGTGGAGATCCTATTTTATATCAACATTTA

LOWAM086_Turkmenistan_3 ACATTATATTTTATTTTTGGTATTTGAGCAGGTATAGTAGGAACTTCCTTAAGATTATTAATTCGTACTGAATTAGGTAATCCTGGATCTTTAATTGGAGATGATCAAATTTATAATACTATTGTAACAGCTCATGCTTTTATTATAATTTTTTTTATAGTTATACCAATTATAATTGGAGGATTTGGAAATTGATTAATTCCTTTAATATTAGGAGCCCCAGATATAGCTTTCCCCCGAATAAATAATATAAGATTTTGATTATTACCCCCCTCATTAACTTTATTAATTTCTAGAAGAATTGTAGAAAATGGAGCAGGAACTGGATGAACAGTTTATCCCCCTTTATCATCTAATATTGCCCATAGAGGTAGTTCAGTTGATTTAGCTATCTTTTCTTTACATTTAGCAGGAATTTCATCAATTTTAGGAGCTATTAATTTTATTACAACTATTATTAATATACGAATTAATCATATATCATTTGATCAAATACCTCTTTTTGTATGAGCAGTAGGAATTACTGCTTTACTTTTATTACTATCTTTACCTGTATTAGCTGGTGCTATTACTATATTATTAACAGATCGAAATCTTAATACCTCATTTTTTGATCCAGCAGGAGGTGGAGATCCTATTTTATATCAACATTTA

LOWAM087_Uzbekistan_Sarchashma ACACTATATTTTATTTTTGGTATTTGAGCAGGTATAGTAGGAACCTCTTTAAGATTATTAATTCGTACTGAATTAGGTAATCCTGGATCTTTAATTGGAGATGATCAAATTTATAATACTATTGTAACAGCTCATGCTTTTATTATAATTTTTTTCATAGTTATACCAATTATAATTGGAGGATTTGGAAATTGATTAATTCCTTTAATATTAGGAGCCCCAGATATAGCTTTTCCTCGAATAAATAATATAAGATTTTGATTACTACCCCCTTCATTAACTTTATTAATTTCCAGAAGAATTGTAGAAAATGGAGCAGGAACAGGATGAACAGTTTATCCCCCTTTATCATCTAATATCGCTCATAGAGGTAGTTCAGTTGATTTAGCTATTTTTTCTTTACATTTAGCAGGAATTTCATCAATTTTAGGAGCTATTAATTTCATTACAACTATTATTAATATACGAATTAACCATATATCATTTGATCAAATACCCCTCTTTGTATGAGCAGTAGGAATTACTGCTTTACTTTTATTATTATCTTTACCTGTATTAGCTGGTGCTATTACTATATTATTAACAGATCGAAATCTTAATACTTCATTTTTTGATCCTGCAGGAGGTGGAGATCCTATTTA??ATCAACATTTA

LOWAM095_Kyrgyzstan_Sosnovka ACACTATATTTTATTTTTGGTATTTGAGCAGGTATAGTAGGAACCTCTTTAAGATTATTAATTCGTACTGAATTAGGTAATCCTGGATCTTTAATTGGAGATGATCAAATTTATAATACTATTGTAACAGCTCATGCTTTTATTATAATTTTTTTTATAGTTATACCAATTATAATTGGAGGATTTGGAAATTGATTAATTCCTTTAATATTAGGGGCTCCAGATATAGCTTTTCCTCGAATAAATAATATAAGATTTTGATTATTACCCCCTTCATTAACTTTATTAATTTCTAGAAGAATTGTAGAAAATGGAGCAGGAACAGGATGAACAGTTTATCCCCCTTTATCATCTAATATCGCTCATAGAGGTAGTTCAGTTGATTTAGCTATTTTTTCTTTACATTTAGCGGGAATTTCATCAATCTTAGGAGCTATTAATTTTATTACAACTATTATTAATATACGAATTAATCATATATCATTTGATCAAATACCTCTCTTTGTATGAGCAGTAGGAATTACTGCTTTACTTTTATTACTATCTTTACCTGTATTAGCTGGTGCTATTACTATATTATTAACAGATCGAAATCTTAATACTTCATTTTTTGATCCTGCAGGAGGTGGAGATCCTATTTTATATCAACATTTA

LOWAM096_Gissar_5 ACACTATATTTTATTTTTGGTATTTGAGCAGGTATAGTAGGAACCTCTTTAAGATTATTAATTCGTACTGAATTAGGTAATCCTGGATCTTTAATTGGAGATGATCAAATTTATAATACTATTGTAACAGCTCATGCTTTTATTATAATTTTTTTCATAGTTATACCAATTATAATTGGAGGATTTGGAAATTGATTAATTCCTTTAATATTAGGAGCCCCAGATATAGCTTTTCCTCGAATAAATAATATAAGATTTTGATTACTACCCCCTTCATTAACTTTATTAATTTCCAGAAGAATTGTAGAAAATGGAGCAGGAACAGGATGAACAGTTTATCCCCCTTTATCGTCTAATATCGCTCATAGAGGTAGTTCAGTTGATTTAGCTATTTTTTCTTTACATTTAGCAGGAATTTCATCAATTTTAGGAGCTATTAATTTCATTACAACTATTATTAATATACGAATTAACCATATATCATTTGATCAAATACCCCTCTTTGTATGAGCAGTAGGAATTACTGCTTTACTTTTATTATTATCTTTACCTGTATTAGCTGGTGCTATTACTATATTATTAACAGATCGAAATCTTAATACTTCATTTTTTGATCCTGCAGGAGGTGGAGATCCTATTTTATATCAACATTTA

LOWAM098_Tajikistan_Khondiza1 ACACTATATTTTATTTTTGGTATTTGAGCAGGTATAATAGGAACCTCTTTAAGATTATTAATTCGTACTGAATTAGGTAATCCTGGATCTTTAATTGGAGATGATCAAATTTATAATACTATTGTAACAGCTCATGCTTTTATTATAATTTTTTTCATAGTTATACCAATTATAATTGGAGGATTTGGAAATTGATTAATTCCTTTAATATTAGGAGCCCCAGATATAGCTTTTCCTCGAATAAATAATATAAGATTTTGATTACTACCCCCTTCATTAACTTTATTAATTTCCAGAAGAATTGTAGAAAATGGAGCAGGAACAGGATGAACAGTTTATCCCCCTTTATCGTCTAATATCGCTCATAGAGGTAGTTCAGTTGATTTAGCTATTTTTTCTTTACATTTAGCAGGAATTTCATCAATTTTAGGAGCTATTAATTTCATTACAACTATTATTAATATACGAATTAACCATATATCATTTGATCAAATACCCCTCTTTGTATGAGCAGTAGGAATTACTGCTTTACTTTTATTATTATCTTTACCTGTATTAGCTGGTGCTATTACTATATTATTAACAGATCGAAATCTTAATACTTCATTTTTTGATCCTGCAGGAGGTGGAGATCCTATTTTATATCAACATTTA

LOWAM099_Uzbekistan_Kamchik_2 ACACTATATTTTATTTTTGGTATTTGAGCAGGTATAGTAGGAACCTCTTTAAGATTATTAATTCGTACTGAATTAGGTAATCCTGGATCTTTAATTGGAGATGATCAAATTTATAATACTATTGTAACAGCTCATGCTTTTATTATAATTTTTTTTATAGTTATACCAATTATAATTGGAGGATTTGGAAATTGATTAATTCCTTTAATATTAGGGGCCCCAGATATAGCTTTTCCTCGAATAAATAATATAAGATTTTGATTATTACCCCCTTCATTAACTTTATTAATTTCTAGAAGAATTGTAGAAAATGGAGCAGGAACAGGATGAACAGTTTATCCCCCTTTATCATCTAATATCGCTCATAGAGGTAGTTCAGTTGATTTAGCTATTTTTTCTTTACATTTAGCAGGAATTTCATCAATTTTAGGAGCTATTAATTTTATTACAACTATTATTAATATACGAATTAATCATATATCATTTGATCAAATACCTCTCTTTGTATGAGCAGTAGGAATTACTGCTTTACTTTTATTACTATCTTTACCTGTATTAGCTGGTGCTATTACTATATTATTAACAGATCGAAATCTTAATACTTCATTTTTTGATCCTGCAGGAGGTGGAGATCCTATTTTATATCAACATTTA

LOWAM100_Kyrgyzstan_Konduk ACACTATATTTTATTTTTGGTATTTGAGCAGGTATAGTAGGAACCTCTTTAAGATTATTAATTCGTACTGAATTAGGTAATCCTGGATCTTTAATTGGAGATGATCAAATTTATAATACTATTGTAACAGCTCATGCTTTTATTATAATTTTTTTTATAGTTATACCAATTATAATTGGAGGATTTGGAAATTGATTAATTCCTTTAATATTAGGGGCCCCAGATATAGCTTTTCCTCGAATAAATAATATAAGATTTTGATTATTACCCCCTTCATTAACTTTATTAATTTCTAGAAGAATTGTAGAAAATGGAGCAGGAACAGGATGAACAGTTTATCCCCCTTTATCATCTAATATCGCTCATAGAGGTAGTTCAGTTGATTTAGCTATTTTTTCTTTACATTTAGCGGGAATTTCATCAATCTTAGGAGCTATTAATTTTATTACAACTATTATTAATATACGAATTAATCATATATCATTTGATCAAATACCTCTCTTTGTATGAGCAGTAGGAATTACTGCTTTACTTTTATTACTATCTTTACCTGTATTAGCTGGTGCTATTACTATATTATTAACAGATCGAAATCTTAATACTTCATTTTTTGATCCTGCAGGAGGTGGAGATCCTATTTTATATCAACATTTA

LOWAM115_Azerbaijan_Nyus_Nyus ACACTATATTTTATTTTCGGTATTTGAGCAGGTATAGTAGGAACCTCTTTAAGATTATTAATTCGTACTGAATTAGGTAATCCCGGATCTTTAATTGGAGATGATCAAATTTATAACACTATTGTAACAGCTCATGCTTTTATTATAATTTTTTTTATAGTTATACCAATTATAATTGGAGGATTTGGAAATTGATTAATTCCTTTAATATTAGGAGCTCCAGATATAGCTTTTCCTCGAATAAATAATATAAGATTTTGATTACTCCCCCCCTCATTAACTTTATTAATTTCTAGAAGAATTGTAGAAAATGGAGCAGGAACAGGATGAACAATTTATCCCCCTTTATCATCTAATATTGCTCATAGAGGTAGTTCAGTTGATTTAGCTATTTTTTCTTTACATTTAGCAGGAATTTCATCAATCTTAGGAGCTATTAATTTTATTACAACTATTATTAACATACGAATTAATCATATATCATTTGATCAAATACCCCTTTTTGTATGAGCAGTAGGAATTACTGCATTACTTTTATTATTATCTTTACCTGTATTAGCTGGTGCTATTACTATATTATTAACAGATCGAAATCTTAATACTTCATTTTTTGATCCTGCAGGAGGTGGAGATCCTATTTTATATCAACACTTA

LOWAM116_Iran_Dizin_2 ACACTATATTTTATTTTCGGTATTTGAGCAGGTATAGTAGGAACCTCTTTAAGATTATTAATTCGTACTGAATTAGGTAATCCTGGATCTTTAATTGGAGATGATCAAATTTATAACACTATTGTAACAGCTCATGCTTTTATTATAATTTTTTTTATAGTTATACCAATTATAATTGGAGGATTTGGAAATTGATTAATTCCTTTAATATTAGGAGCTCCAGATATAGCTTTTCCTCGAATAAATAATATAAGATTTTGATTACTCCCCCCCTCATTAACTTTATTAATTTCTAGAAGAATTGTAGAAAATGGAGCAGGAACAGGATGAACAATTTATCCCCCTTTATCATCTAATATTGCTCATAGAGGTAGTTCAGTTGATTTAGCTATTTTTTCTTTACATTTAGCAGGAATTTCATCAATCTTAGGAGCTATTAATTTTATTACAACTATTATTAACATACGAATTAATCATATATCATTTGATCAAATACCCCTTTTTGTATGAGCAGTAGGAATTACTGCATTACTTTTATTATTATCTTTACCTGTATTAGCTGGTGCTATTACTATATTATTAACAGATCGAAATCTTAATACTTCATTTTTTGATCCTGCAGGAGGTGGAGATCCTATTTTATATCAACACTTA

LOWAM122_Russia_Saratow_1 ACACTATATTTTATTTTTGGTATTTGAGCAGGTATAGTAGGAACCTCTTTAAGATTATTAATTCGTACTGAATTAGGTAATCCTGGATCTTTAATTGGAGATGATCAAATTTATAACACTATTGTAACAGCTCATGCTTTTATTATAATTTTTTTTATAGTTATACCAATTATAATTGGAGGATTTGGAAATTGATTAATTCCTTTAATATTAGGAGCCCCAGATATAGCTTTTCCTCGAATAAATAATATAAGATTTTGATTACTACCCCCCTCATTAACTTTATTAATTTCTAGAAGAATTGTAGAAAATGGAGCAGGAACAGGATGAACAGTTTATCCCCCTTTATCATCTAATATCGCTCATAGAGGTAGTTCAGTTGATTTAGCTATTTTTTCTTTACATTTAGCAGGAATTTCATCAATCTTAGGAGCTATTAATTTTATTACAACTATTATTAATATACGAATTAACCATATATCATTTGATCAAATACCTCTCTTTGTATGAGCAGTAGGAATTACTGCTTTACTTTTATTATTATCTTTACCTGTATTAGCTGGTGCTATTACTATATTATTAACAGATCGAAATCTTAATACTTCATTTTTTGATCCTGCAGGAGGTGGGGATCCTATTTTATATCAACATTTA

LOWAM136_Uzbekistan_Tamshush_1 ACACTATATTTTATTTTTGGTATTTGAGCAGGTATAGTAGGAACCTCTTTAAGATTATTAATTCGTACTGAATTAGGTAATCCTGGATCTTTAATTGGAGATGATCAAATTTATAATACTATTGTAACAGCTCATGCTTTTATTATAATTTTTTTCATAGTTATACCAATTATAATTGGAGGATTTGGAAATTGATTAATTCCTTTAATATTAGGAGCCCCAGATATAGCTTTTCCTCGAATAAATAATATAAGATTTTGATTACTACCCCCTTCATTAACTTTATTAATTTCCAGAAGAATTGTAGAAAATGGAGCAGGAACAGGATGAACAGTTTATCCCCCTTTATCATCTAATATCGCTCATAGAGGTAGTTCAGTTGATTTAGCTATTTTTTCTTTACATTTAGCAGGAATTTCATCAATTTTAGGAGCTATTAATTTCATTACAACTATTATTAATATACGAATTAACCATATATCATTTGATCAAATACCCCTCTTTGTATGAGCAATAGGAATTACTGCTTTACTTTTATTATTATCTTTACCTGTATTAGCTGGTGCTATTACTATATTATTAACAGATCGAAATCTTAATACTTCATTTTTTGATCCTGCAGGAGGTGGAGATCCTATTTTATATCAACATTTA

LOWAM149_Kyrgyzstan_Songkel_1 ACACTATATTTTATTTTTGGTATTTGAGCAGGTATAGTAGGAACCTCTTTAAGATTATTAATTCGTACTGAATTAGGTAATCCTGGATCTTTAATTGGAGATGATCAAATTTATAATACTATTGTAACAGCTCATGCTTTTATTATAATTTTTTTTATAGTTATACCAATTATAATTGGAGGATTTGGAAATTGATTAATTCCTTTAATATTAGGGGCCCCAGATATAGCTTTTCCTCGAATAAATAATATAAGATTTTGATTATTACCCCCCTCATTAACTTTATTAATTTCTAGAAGAATTGTAGAAAATGGAGCAGGAACAGGATGAACAGTTTATCCCCCTTTATCATCTAATATTGCTCATAGAGGTAGTTCAGTTGATTTAGCTATTTTTTCTTTACATTTAGCGGGAATTTCATCAATCTTAGGAGCTATTAATTTTATTACAACTATTATTAATATACGAATTAATCATATATCATTTGATCAAATACCTCTCTTTGTATGAGCAGTAGGAATTACTGCTTTACTTTTATTACTATCTTTACCTGTATTAGCTGGTGCTATTACTATATTATTAACAGATCGAAATCTTAATACTTCATTTTTTGATCCTGCAGGAGGTGGAGATCCTATTTTATATCAACATTTA

LOWAM198_Turkey_Aladaglar_2 ACACTATATTTTATTTTTGGTATTTGAGCAGGTATAGTAGGAACCTCTTTAAGATTATTAATTCGTACTGAATTAGGTAATCCTGGATCTTTAATTAGAGATGATCAAATTTATAATACTATTGTAACAGCTCATGCTTTTATTATAATTTTTTTTATAGTTATACCAATTATAATTGGAGGATTTGGAAATTGATTAATTCCTTTAATATTAGGAGCTCCAGATATAGCTTTTCCTCGAATAAATAATATAAGATTTTGATTACTTCCCCCTTCATTAACTTTATTAATTTCTAGAAGAATTGTAGAAAATGGAGCAGGAACAGGATGAACAGTTTATCCCCCTTTATCATCTAATATTGCTCATAGAGGTAGTTCAGTTGATTTAGCTATTTTTTCTTTACATTTAGCAGGAATTTCATCAATCTTAGGAGCTATTAATTTTATTACAACTATTATTAATATA---------------------------------------------------------------------------------------------------------------------------------------------------------------------------------------------

LOWAM213_Tajikistan_Tandukul_1 ACACTATATTTTATTTTTGGTATTTGAGCAGGTATAGTAGGAACCTCTTTAAGATTATTAATTCGTACTGAATTAGGTAATCCTGGATCTTTAATTGGAGATGATCAAATTTATAATACTATTGTAACAGCTCATGCTTTTATTATAATTTTTTTCATAGTTATACCAATTATAATTGGAGGATTTGGAAATTGATTAATTCCTTTAATATTAGGAGCCCCAGATATAGCTTTTTCTCGAATAAATAATATAAGATTTTGATTACTACCCCCTTCATTAACTTTATTAATTTCTAGAAGAATTGTAGAAAATGGAGCAGGAACAGGATGAACAGTTTATCCCCCTTTATTATCTAATATCGCTCATAGAGGTAGTTCAGTTGATTTAGCTATTTTTTCTTTACATTTAGCAGGAATTTCATCAATTTTAGGAGCTATTAATTTCATTACAACTATTATTAATATACGAATTAACCATATATCATTTGATCAAATACCCCTCTTTGTATGAGCAGTAGGAATTACTGCGTTACTTTTATTATTATCTTTACCTGTATTAGCTGGTGCTATTACTATATTATTAACAGATCGAAATCTTAATACTTCATTTTTTGATCCTGCAGGAGGTGGAGATCCTATTTTATATCAACATTTA

Parnassius_clodius ACATTATATTTTATTTTTGGTATTTGAGCAGGTATAGTAGGAACCTCTTTAAGATTATTAATTCGTACTGAATTAGGTAATCCTGGATCTTTAATTGGAGATGATCAAATTTATAATACTATTGTAACAGCTCATGCTTTTATCATAATTTTTTTCATAGTTATACCAATTATAATTGGAGGATTTGGAAATTGATTAATTCCATTAATATTAGGAGCTCCAGATATAGCTTTTCCTCGAATAAATAATATAAGATTTTGATTATTACCCCCTTCATTAACTTTATTAATTTCTAGAAGAATTGTACAAAATGGAGCAGGAACTGGATGAACAGTTTATCCCCCTTTATCATCTAATATTGCTCATAGAGGAAGATCAGTTGATTTAGCTATTTTTTCTTTACATTTAGCTGGAATTTCATCTATCTTAGGAGCTATTAATTTTATTACAACTATTATTAATATACGAATTAATCATATATCATTTGATCAAATACCCCTTTTTGTATGAGCAGTAGGAATTACCGCTTTACTTCTATTATTATCTTTACCTGTTTTAGCAGGTGCTATTACCATATTATTAACAGATCGAAATCTTAATACTTCATTTTTTGATCCAGCAGGAGGTGGAGATCCTATTTTATATCAACACTTA

Parnassius_eversmanni_2005_LOWA_108 ---------------------ATTTGAGCAGGTATAGTAGGAACCTCTTTAAGATTATTAATTCGTTCTGAATTAGGTAATCCTGGATCTTTAATTGGAGATGATCAAATTTATAATACTATTGTAACAGCTCATGCTTTTATTATAATTTTTTTTATAGTTATACCAATTATAATTGGAGGATTTGGAAATTGATTAATTCCATTAATATTAGGAGCTCCAGATATAGCTTTTCCTCGAATAAATAATATAAGATTTTGATTATTACCCCCCTCATTAACCTTACTAATTTCTAGAAGAATTGTAGAAAATGGAGCAGGAACTGGATGAACGGTTTATCCCCCTTTATCATCTAATATTGCTCATAGAGGAAGATCAGTTGATTTAGCTATCTTTTCTTTACATTTAGCTGGAATTTCATCTATCTTAGGAGCTATTAATTTTATTACAACTATTATTAATATACGAATTAATCATATATCATTTGATCAAATACCCCTTTTTGTATGAGCAGTAGGAATTACTGCTTTACTTTTATTATTATCTTTACCTGTTTTAGCAGGTGCTATTACCATATTATTAACAGATCGAAATCTTAATACTTCATTTTTTGACCCAGCAGGAGGTGGAGATCCTATTTTATATCAACATTTA

Parnassius_eversmanni_2005_LOWA_107 ---------------------ATTTGAGCAGGTATAGTAGGAACCTCTTTAAGATTATTAATTCGTTCTGAATTAGGTAATCCTGGATCTTTAATTGGAGATGATCAAATTTATAATACTATTGTAACAGCTCATGCTTTTATTATAATTTTTTTTATAGTTATACCAATTATAATTGGAGGATTTGGAAATTGATTAATTCCATTAATATTAGGAGCTCCAGATATAGCTTTTCCTCGAATAAATAATATAAGATTTTGATTATTACCCCCCTCATTAACCTTACTAATTTCTAGAAGAATTGTAGAAAATGGAGCAGGAACTGGATGAACGGTTTATCCCCCTTTATCATCTAATATTGCTCATAGAGGAAGATCAGTTGATTTAGCTATCTTTTCTTTACATTTAGCTGGAATTTCATCTATCTTAGGAGCTATTAATTTTATTACAACTATTATTAATATACGAATTAATCATATATCATTTGATCAAATACCCCTTTTTGTATGAGCAGTAGGAATTACTGCTTTACTTTTATTATTATCTTTACCTGTTTTAGCAGGTGCTATTACCATATTATTAACAGATCGAAATCTTAATACTTCATTTTTTGACCCAGCAGGAGGTGGAGATCCTATTTTATATCAACATTTA

Parnassius_stubbendorfii_2005_LOWA_815 ACATTATATTTTATTTTTGGTATTTGAGCAGGTATAGTAGGAACTTCTTTAAGATTATTAATTCGTACTGAATTAGGTAATCCTGGATCTTTAATTGGAGATGATCAAATTTATAATACTATTGTAACAGCTCATGCTTTTATTATAATTTTTTTTATAGTTATACCAATTATAATTGGAGGATTTGGAAATTGATTAATTCCTTTAATATTAGGAGCCCCAGATATAGCTTTTCCTCGAATAAATAATATAAGATTTTGATTATTACCCCCTTCATTAACTTTACTAATTTCCAGAAGAATTGTAGAAAATGGGGCAGGAACTGGATGAACAGTCTACCCTCCTTTATCATCTAATATTGCTCACGGAGGAAGATCTGTTGATTTAGCTATTTTTTCCTTACATTTAGCGGGAATTTCATCTATTTTAGGAGCCATTAATTTTATTACAACTATTATTAATATACGAATTAATCATATATCATTTGATCAAATACCTCTTTTTGTATGAGCAGTAGGAATTACTGCTTTACTTTTATTATTATCTCTACCTGTTTTAGCAGGTGCTATTACTATATTATTAACAGATCGAAATCTTAATACTTCATTTTTTGACCCAGCAGGAGGTGGAGATCCTATTTTATATCAACACTTA

Parnassius_stubbendorfii_2005_LOWA_154 ACATTATATTTTATTTTTGGTATTTGAGCAGGTATAGTAGGAACTTCTTTAAGATTATTAATTCGTACTGAATTAGGTAATCCTGGATCTTTAATTGGAGATGATCAAATTTATAATACTATTGTAACAGCTCATGCTTTTATTATAATTTTTTTTATAGTTATACCAATTATAATTGGAGGATTTGGAAATTGATTAATTCCTTTAATATTAGGAGCCCCAGATATAGCTTTTCCTCGAATAAATAATATAAGATTTTGATTATTACCCCCTTCATTAACTTTACTAATTTCCAGAAGAATTGTAGAAAATGGAGCAGGAACTGGATGAACAGTCTACCCTCCTTTATCATCTAATATTGCTCACGGAGGAAGATCTGTTGATTTAGCTATTTTTTCCTTACATTTAGCGGGAATTTCATCTATTTTAGGAGCCATTAATTTTATTACAACTATTATTAATATACGAATTAATCATATATCATTTGATCAAATACCTCTTTTTGTATGAGCAGTAGGAATTACTGCTTTACTTTTATTATTATCTCTACCTGTTTTAGCAGGTGCTATTACTATATTATTAACAGATCGAAATCTTAATACTTCATTTTTTGACCCAGCAGGAGGTGGAGATCCTATTTTATATCAACACTTA

Parnassius_stubbendorfii_2005_LOWA_153 -CATTATATTTTATTTTTGGTATTTGAGCAGGTATAGTAGGAACTTCTTTAAGATTATTAATTCGTACTGAATTAGGTAATCCTGGATCTTTAATTGGAGATGATCAAATTTATAATACTATTGTAACAGCTCATGCTTTTATTATAATTTTTTTTATAGTTATACCAATTATAATTGGAGGATTTGGAAATTGATTAATTCCTTTAATATTAGGAGCCCCAGATATAGCTTTTCCTCGAATAAATAATATAAGATTTTGATTATTACCCCCTTCATTAACTTTACTAATTTCCAGAAGAATTGTAGAAAATGGAGCAGGAACTGGATGAACAGTCTACCCTCCTTTATCATCTAATATTGCTCACGGAGGAAGATCTGTTGATTTAGCTATTTTTTCCTTACATTTAGCGGGAATTTCATCTATTTTAGGAGCCATTAATTTTATTACAACTATTATTAATATACGAATTAATCATATATCATTTGATCAAATACCTCTTTTTGTATGAGCAGTAGGAATTACTGCTTTACTTTTATTATTATCTCTACCTGTTTTAGCAGGTGCTATTACTATATTATTAACAGATCGAAATCTTAATACTTCATTTTTTGACCCAGCAGGAGGTGGAGATCCTATTTTATATCAACACTTA

Parnassius_nordmanni ACATTATATTTTATTTTTGGTATTTGAGCAGGTATAGTAGGAACTTCTTTAAGATTATTAATTCGTACTGAATTAGGTAATCCTGGATCTCTAATTGGAGATGATCAAATTTACAATACTATCGTAACAGCTCATGCTTTTATTATAATTTTTTTCATAGTTATACCAATTATAATTGGAGGATTTGGAAATTGATTAATTCCATTAATATTAGGAGCTCCAGATATAGCTTTCCCCCGAATAAATAATATAAGATTTTGATTATTACCCCCCTCATTAACTCTATTAATTTCTAGAAGAATTGTAGAAAATGGGGCAGGAACTGGATGAACAGTTTACCCCCCTTTATCATCTAATATTGCTCATAGAGGAAGATCAGTTGACTTAGCTATTTTTTCTTTACATTTGGCTGGGATTTCTTCTATTTTAGGAGCTATTAATTTTATCACAACTATTGTTAATATACGAATTAACTATATATCATTTGATCAAATACCTCTTTTCGTATGAGCAGTAGGAATTACTGCTTTACTTTTATTATTATCTTTACCTGTTTTAGCAGGTGCTATTACTATATTATTAACAGATCGAAATCTTAATACTTCATTTTTTGATCCAGCAGGAGG?GGAGACCCTATTCTATATCAA------

Parnassius_eversmanni ACATTATATTTTATTTTTGGTATTTGAGCAGGTATAGTAGGAACCTCTTTAAGATTATTAATTCGTTCTGAATTAGGTAATCCTGGATCTTTAATTGGAGATGATCAAATTTATAATACTATTGTAACAGCTCATGCTTTTATTATAATTTTTTTTATAGTTATACCAATTATAATTGGAGGATTTGGAAATTGATTAATTCCATTAATATTAGGAGCTCCAGATATAGCTTTTCCTCGAATAAATAATATAAGATTTTGATTATTACCCCCCTCATTAACCTTACTAATTTCTAGAAGAATTGTAGAAAATGGAGCAGGAACTGGATGAACGGTTTATCCCCCTTTATCATCTAATATTGCTCATAGAGGAAGATCAGTTGATTTAGCTATCTTTTCTTTACATTTAGCTGGAATTTCATCTATCTTAGGAGCTATTAATTTTATTACAACTATTATTAATATACGAATTAATCATATATCATTTGATCAAATACCCCTTTTTGTATGAGCAGTAGGAATTACTGCTTTACTTTTATTATTATCTTTACCTGTTTTAGCAGGTGCTATTACCATATTATTAACAGATCGAAATCTTAATACTTCATTTTTTGACCCAGCAGGAGGTGGAGATCCTATTTTATATCAA------

Parnassius_eversmanni_felderi ACATTATATTTTATTTTTGGTATTTGAGCAGGTATAGTAGGAACCTCTTTAAGATTATTAATTCGTTCTGAATTAGGTAATCCTGGATCTTTAATTGGAGATGATCAAATTTATAATACTATTGTAACAGCTCATGCTTTTATTATAATTTTTTTTATAGTTATACCAATTATAATTGGAGGATTTGGAAATTGATTAATTCCATTAATATTAGGAGCTCCAGATATAGCTTTTCCTCGAATAAATAATATAAGATTTTGATTATTACCCCCCTCATTAACCTTACTAATTTCTAGAAGAATTGTAGAAAATGGAGCAGGAACTGGATGAACGGTTTATCCCCCTTTATCATCTAATATTGCTCATAGAGGAAGATCAGTTGATTTAGCTATCTTTTCTTTACA?TTAGCTGGAATTTCATCTATCTTAGGAGCTATTAATTTTATTACAACTATTATTAATATACGAATTAATCATATATCATTTGATCAAATACCCCTTTTTGTATGAGCAGTAGGAATTACTGCTTTACTTTTATTATTATCTTTACCTGTTTTAGCAGGTGCTATTACCATATTATTAACAGATCGAAATCTTAATACTTCATTTTTTGACCCAGCAGGAGGTGGAGATCCTATTTTATATCAA------

Parnassius_ariadne_ariadne ACATTATATTTTATTTTTGGTATTTGAGCAGGTATAGTAGGAACCTCTTTAAGATTATTAATTCGTACTGAATTAGGTAATCCTGGATCTTTAATTGGAGATGATCAAATTTATAATACTATCGTAACAGCTCATGCTTTTATTATAATTTTTTTTATAGTTATACCAATTATAATTGGAGGATTTGGAAATTGATTAATTCCTTTAATATTAGGAGCTCCAGATATAGCCTTTCCTCGAATAAATAATATAAGATTTTGATTACTACCCCCCTCATTAACTTTATTAATCTCTAGAAGAATTGTAGAAAATGGAGCAGGAACTGGATGAACAGTTTATCCCCCTTTATCATCTAATATTGCTCATAGAGGAAGTTCAGTTGATTTAGCCATTTTCTCTTTACATTTAGCAGGAATTTCATCAATTTTAGGAGCTATTAATTTTATCACAACTATTATTAATATACGAATTAATCATATATCATTTGATCAAATACCCCTTTTTGTTTGAGCAGTAGGAATTACTGCTTTACTATTATTATTATCTTTACCTGTATTAGCTGGTGCTATTACTATATTATTAACAGATCGAAATCTTAATACTTCATTTTTTGATCCAGCAGGA????GAGATCCTATTTTATATCAA------

Parnassius_glacialis_mikado ACATTATATTTTATTTTTGGTATTTGAGCAGGTATAGTAGGAACCTCCTTAAGATTATTAATTCGTACTGAATTAGGTAATCCTGGATCTTTAATTGGAGATGATCAAATTTATAATACTATTGTAACAGCTCATGCTTTTATTATAATTTTTTTTATAGTTATACCAATTATAATTGGAGGATTTGGAAATTGATTAATCCCTTTAATATTAGGAGCTCCAGATATAGCTTTCCCCCGAATAAATAATATAAGATTTTGATTATTACCCCCCTCATTAACTTTACTAATTTCCAGAAGAATTGTAGAAAATGGAGCAGGAACAGGATGAACAGTTTATCCCCCATTATCCTCTAATATTGCCCACAGAGGAAGATCTGTTGATTTAGCTATTTTTTCTTTACATTTAGCAGGAATTTCATCTATTCTAGGAGCTATTAATTTTATTACAACTATTATTAATATACGAATTAATCATATATCATTTGATCAAATACCTCTCTTTGTTTGAGCAGTAGGAATTACTGCTTTACTTTTATTATTATCCCTACCTGTTTTAGCAGGTGCTATTACTATATTATTAACAGATCGAAATCTTAATACTTCTTTTTTTGACCCAGCAGGAGGTGGAGATCCAATTTTATATCAA------

Parnassius_stubbendorfii_hoenei ACATTATATTTTATTTTTGGTATTTGAGCAGGAATAGTAGGAACCTCCCTAAGATTATTAATTCGTACTGAATTAGGTAATCCCGGATCTTTAATTGGAGATGATCAAATTTACAATACTATTGTAACAGCTCATGCTTTCATTATAATTTTTTTTATAGTTATACCAATTATAATTGGAGGATTTGGAAATTGACTGATTCCTTTAATATTAGGAGCCCCAGATATAGCTTTCCCCCGAATAAATAATATAAGATTTTGATTACTACCCCCCTCATTAACTTTATTAATTTCTAGAAGAATTGTAGAAAATGGAGCAGGAACTGGATGAACAGTCTATCCCCCTTTATCATCTAATATTGCCCATAGAGGAAGATCCGTTGATTTAGCTATTTTTTCCTTACATTTAGCAGGAATTTCATCTATTTTAGGAGCCATTAATTTTATTACAACTATTATTAATATACGAATTAATCATATATCATTTGATCAAATACCTCTTTTTGTATGAGCAGTAGGAATTACTGCTTTACTTTTATTATTATCTTTACCTGTTTTAGCAGGTGCTATTACTATATTATTAACAGATCGAAATCTTAATACTTCCTTTTTTGACCCAGCAGGAGGTGGAGATCCTATTTTATACCAA------

Parnassius_stubbendorfii_hoenei_AC20_16 ------------------------TGAGCAGGAATAGTAGGAACCTCCCTAAGATTATTAATTCGTACTGAATTAGGTAATCCCGGATCTTTAATTGGAGATGATCAAATTTACAATACTATTGTAACAGCTCATGCTTTCATTATAATTTTTTTTATAGTTATACCAATTATAATTGGAGGATTTGGAAATTGACTGATTCCTTTAATATTAGGAGCCCCAGATATAGCTTTCCCCCGAATAAATAATATAAGATTTTGATTACTACCCCCCTCATTAACTTTATTAATTTCTAGAAGAATTGTAGAAAATGGAGCAGGAACTGGATGAACAGTCTATCCCCCTTTATCATCTAATATTGCCCATAGAGGAAGATCCGTTGATTTAGCTATTTTTTCCTTACATTTAGCAGGAATTTCATCTATTTTAGGAGCCATTAATTTTATTACAACTATTATTAATATACGAATTAATCATATATCATTTGATCAAATACCTCTTTTTGTATGAGCAGTAGGAATTACTGCTTTACTTTTATTATTATCTTTACCTGTTTTAGCAGGTGCTATTACTATATTATTAACAGATCGAAATCTTAATACTTCCTTTTTTGACCCCGCAGGAGGTGGAGATCCTATTTTATACCAACATTTA

Parnassius_stubbendorfii_koreanus ------------------------TGAGCAGGTATAGTAGGAACTTCTTTAAGATTATTAATTCGTACTGAATTAGGTAATCCTGGATCTTTAATTGGAGATGATCAAATTTATAATACTATTGTAACAGCTCATGCTTTTATTATAATTTTTTTTATAGTTATACCAATTATAATTGGAGGATTTGGAAATTGATTAATTCCTTTAATATTAGGAGCCCCAGATATAGCTTTTCCTCGAATAAATAATATAAGATTTTGACTATTACCCCCCTCATTAACTTTACTAATTTCCAGAAGAATTGTAGAAAATGGAGCAGGAACTGGATGAACAGTCTACCCTCCTTTATCATCTAATATTGCTCACGGAGGAAGATCTGTTGATTTAGCTATTTTTTCCTTACATTTAGCAGGAATTTCATCTATTTTAGGAGCCATTAATTTTATTACAACTATTATTAATATACGAATTAATCATATATCATTTGATCAAATACCTCTTTTTGTATGAGCAGTAGGAATTACTGCTTTACTTTTATTATTATCTCTACCTGTTTTAGCAGGTGCTATTACTATATTATTAACAGATCGAAATCTTAATACTTCATTTTTTGACCCAGCAGGAGGTGGAGATCCTATTTTATATCAACACTTA

Parnassius_nordmanni_AC20_5 ------------------------TGAGCAGGTATAGTAGGAACTTCTTTAAGATTATTAATTCGTACTGAATTAGGTAATCCTGGATCTCTAATTGGAGATGATCAAATTTACAATACTATCGTAACAGCTCATGCTTTTATTATAATTTTTTTCATAGTTATACCAATTATAATTGGAGGATTTGGAAATTGATTAATTCCATTAATATTAGGAGCTCCAGATATAGCTTTCCCCCGAATAAATAATATAAGATTTTGATTATTACCCCCCTCATTAACTCTATTAATTTCTAGAAGAATTGTAGAAAATGGGGCAGGAACTGGATGAACAGTTTACCCCCCTTTATCATCTAATATTGCTCATAGAGGAAGATCAGTTGACTTAGCTATTTTTTCTTTACATTTGGCTGGGATTTCTTCTATTTTAGGAGCTATTAATTTTATCACAACTATTGTTAATATACGAATTAACTATATATCATTTGATCAAATACCTCTTTTCGTATGAGCAGTAGGAATTACTGCTTTACTTTTATTATTATCTTTACCTGTTTTAGCAGGTGCTATTACTATATTATTAACAGATCGAAATCTTAATACTTCATTTTTTGATCCAGCAGGAGGTGGAGACCCTATTCTATATCAACATTTA

Parnassius_eversmanni_felderi_AC23_68 ------------------------TGAGCAGGTATAGTAGGAACCTCTTTAAGATTATTAATTCGTTCTGAATTAGGTAATCCTGGATCTTTAATTGGAGATGATCAAATTTATAATACTATTGTAACAGCTCATGCTTTTATTATAATTTTTTTTATAGTTATACCAATTATAATTGGAGGATTTGGAAATTGATTAATTCCATTAATATTAGGAGCTCCAGATATAGCTTTTCCTCGAATAAATAATATAAGATTTTGATTATTACCCCCCTCATTAACCTTACTAATTTCTAGAAGAATTGTAGAAAATGGAGCAGGAACTGGATGAACGGTTTATCCCCCTTTATCATCTAATATTGCTCATAGAGGAAGATCAGTTGATTTAGCTATCTTTTCTTTACATTTAGCTGGAATTTCATCTATCTTAGGAGCTATTAATTTTATTACAACTATTATTAATATACGAATTAATCATATATCATTTGATCAAATACCCCTTTTTGTATGAGCAGTAGGAATTACTGCTTTACTTTTATTATTATCTTTACCTGTTTTAGCAGGTGCTATTACCATATTATTAACAGATCGAAATCTTAATACTTCATTTTTTGACCCAGCAGGAGGTGGAGATCCTATTTTATTTCAACATTTA

Parnassius_eversmanni_eversmanni_AC1_14 ------------------------TGATCAGGTATAGTAGGAACCTCTTTAAGATTATTAATTCGTTCTGAATTAGGTAATCCTGGATCTTTAATTGGAGATGATCAAATTTATAATACTATTGTAACAGCTCATGCTTTTATTATAATTTTTTTTATAGTTATACCAATTATAATTGGAGGATTTGGAAATTGATTAATTCCATTAATATTAGGAGCTCCAGATATAGCTTTTCCTCGAATAAATAATATAAGATTTTGATTATTACCCCCCTCATTAACCTTACTAATTTCTAGAAGAATTGTAGAAAATGGAGCAGGAACTGGATGAACGGTTTATCCCCCTTTATCATCTAATATTGCTCATAGAGGAAGATCAGTTGATTTAGCTATCTTTTCTTTACATTTAGCTGGAATTTCATCTATCTTAGGAGCTATTAATTTTATTACAACTATTATTAATATACGAATTAATCATATATCATTTGATCAAATACCCCTTTTTGTATGAGCAGTAGGAATTACTGCTTTACTTTTATTATTATCTTTACCTGTTTTAGCAGGTGCTATTACCATATTATTAACAGATCGAAATCTCAATACTTCATTTTTTGACCCAGCAGGAGGTGGAGATCCTATTTTATATCAACATTTA

Parnassius_clodius_AC4_5 ------------------------TGAGCAGGAATATTAGGAACCTCTTTAAGATTATTAATTCGTACTGAATTAGGTAATCCTGGATCTTTAATTGGAGATGATCAAATTTATAATACTATTGTAACAGCTCATGCTTTTATCATAATTTTTTTCATAGTTATACCAATTATAATTGGAGGATTTGGAAATTGATTAATTCCATTAATATTAGGAGCTCCAGATATAGCTTTTCCTCGAATAAATAATATAAGATTTTGATTATTACCCCCTTCATTAACTTTATTAATTTCTAGAAGAATTGTAGAAAATGGAGCAGGAACTGGATGAACAGTTTATCCCCCTTTATCATCTAATATTGCTCATAGAGGAAGATCAGTTGATTTAGCTATTTTTTCTTTACATTTAGCTGGAATTTCATCTATCTTAGGAGCTATTAATTTTATTACAACTATTATTAATATACGAATTAATCATATATCATTTGATCAAATACCCCTTTTTGTATGAGCAGTAGGAATTACCGCTTTACTTCTATTATTATCTTTACCTGTTTTAGCAGGTGCTATTACCATATTATTAACAGATCGAAATCTTAATACTTCATTTTTTGATCCAGCAGGAGGTGGAGATCCTATTTTATATCAACACTTA

Parnassius_ariadne_AC4_14 ------------------------TGAGCAGGTATAGTAGGAACCTCTTTAAGATTATTAATTCGTACTGAATTAGGTAATCCTGGATCTTTAATTGGAGATGATCAAATTTATAATACTATCGTAACAGCTCATGCTTTTATTATAATTTTTTTTATAGTTATACCAATTATAATTGGAGGATTTGGAAATTGATTAATTCCTTTAATATTAGGAGCTCCAGATATAGCCTTTCCTCGAATAAATAATATAAGATTTTGATTACTACCCCCCTCATTAACTTTATTAATCTCTAGAAGAATTGTAGAAAATGGAGCAGGAACTGGATGAACAGTTTATCCCCCTTTATCATCTAATATTGCTCATAGAGGAAGTTCAGTTGATTTAGCCATTTTCTCTTTACATTTAGCAGGAATTTCATCAATTTTAGGAGCTATTAATTTTATCACAACTATTATTAATATACGAATTAATCATATATCATTTGATCAAATACCCCTTTTTGTTTGAGCAGTAGGAATTACTGCTTTACTATTATTATTATCTTTACCTGTATTAGCTGGTGCTATTACTATATCATTAACAGATCGAAATCTTAATACTTCATTTTTTGATCCAGCAGGAGGTGGAGATCCTATTTTATATCAACACTTA

HQ004911_RV_07_C107_Romania ACACTATATTTTATTTTTGGTATTTGAGCAGGTATAGTAGGAACCTCTTTAAGATTATTAATTCGTACTGAATTAGGTAATCCTGGATCTTTAATTGGAGATGATCAAATTTATAATACTATTGTAACAGCTCATGCTTTTATTATAATTTTTTTTATAGTTATACCAATTATAATTGGAGGATTTGGAAATTGATTAATTCCTTTAATATTAGGAGCCCCAGATATAGCTTTTCCTCGAATAAATAATATAAGATTTTGATTACTACCCCCCTCATTAACTTTATTAATTTCTAGAAGAATTGTAGAAAATGGAGCAGGAACAGGATGAACAGTTTATCCCCCTTTATCATCTAATATCGCTCATAGAGGTAGTTCAGTTGATTTAGCTATTTTTTCTTTACATTTAGCAGGAATTTCATCAATCTTAGGAGCTATTAATTTTATTACAACTATTATTAATATACGAATTAACCATATATCATTTGATCAAATACCTCTCTTTGTATGAGCAGTAGGAATTACTGCTTTACTTTTATTATTATCTTTACCTGTATTAGCTGGTGCTATTACTATATTATTAACAGATCGAAATCTTAATACTTCATTTTTTGATCCTGCAGGAGGTGGAGATCCTATTTTATATCAACATTTA

HQ004908_RV_07_D060_Romania ACACTATATTTTATTTTTGGTATTTGAGCAGGTATAGTAGGAACCTCTTTAAGATTATTAATTCGTACTGAATTAGGTAATCCTGGATCTTTAATTGGAGATGATCAAATTTATAATACTATTGTAACAGCTCATGCTTTTATTATAATTTTTTTTATAGTTATACCAATTATAATTGGAGGATTTGGAAATTGATTAATTCCTTTAATATTAGGAGCCCCAGATATAGCTTTTCCTCGAATAAATAATATAAGATTTTGATTACTACCCCCCTCATTAACTTTATTAATTTCTAGAAGAATTGTAGAAAATGGAGCAGGAACAGGATGAACAGTTTATCCCCCTTTATCATCTAATATCGCTCATAGAGGTAGTTCAGTTGATTTAGCTATTTTTTCTTTACATTTAGCAGGAATTTCATCAATCTTAGGAGCTATTAATTTTATTACAACTATTATTAATATACGAATTAACCATATATCATTTGATCAAATACCTCTCTTTGTATGAGCAGTAGGAATTACTGCTTTACTTTTATTATTATCTCTACCTGTATTAGCTGGTGCTATTACTATATTATTAACAGATCGAAATCTTAATACTTCATTTTTTGATCCTGCAGGAGGTGGAGATCCTATTTTATATCAACATTTA

HQ004907_RV_08_M274_Romania ACACTATATTTTATTTTTGGTATTTGAGCAGGTATAGTAGGAACCTCTTTAAGATTATTAATTCGTACTGAATTAGGTAATCCTGGATCTTTAATTGGAGATGATCAAATTTATAATACTATTGTAACAGCTCATGCTTTTATTATAATTTTTTTTATAGTTATACCAATTATAATTGGAGGATTTGGAAATTGATTAATTCCTTTAATATTAGGAGCCCCAGATATAGCTTTTCCTCGAATAAATAATATAAGATTTTGATTACTACCCCCCTCATTAACTTTATTAATTTCTAGAAGAATTGTAGAAAATGGAGCAGGAACAGGATGAACAGTTTATCCCCCTTTATCATCTAATATCGCTCATAGAGGTAGTTCAGTTGATTTAGCTATTTTTTCTTTACATTTAGCAGGAATTTCATCAATCTTAGGAGCTATTAATTTTATTACAACTATTATTAATATACGAATTAACCATATATCATTTGATCAAATACCTCTATTTGTATGAGCAGTAGGAATTACTGCTTTACTTTTATTATTATCTTTACCTGTATTAGCTGGTGCTATTACTATATTATTAACAGATCGAAATCTTAATACTTCATTTTTTGATCCTGCAGGAGGTGGAGATCCTATTTTATATCAACATTTA

HQ004902_RV_08_M361_Romania ACACTATATTTTATTTTTGGTATTTGAGCAGGTATAGTAGGAACCTCTTTAAGATTATTAATTCGTACTGAATTAGGTAATCCTGGATCTTTAATTGGAGATGATCAAATTTATAATACTATTGTAACAGCTCATGCTTTTATTATAATTTTTTTTATAGTTATACCAATTATAATTGGAGGATTTGGAAATTGATTAATTCCCTTAATATTAGGAGCCCCAGATATAGCTTTTCCTCGAATAAATAATATAAGATTTTGATTACTACCCCCCTCATTAACTTTATTAATTTCTAGAAGAATTGTAGAAAATGGAGCAGGAACAGGATGAACAGTTTATCCCCCTTTATCATCTAATATCGCTCATAGAGGTAGTTCAGTTGATTTAGCTATTTTTTCTTTACATTTAGCAGGAATTTCATCAATCTTAGGAGCTATTAATTTTATTACAACTATTATTAATATACGAATTAACCATATATCATTTGATCAAATACCTCTCTTTGTATGAGCAGTAGGAATTACTGCTTTACTTTTATTATTATCTTTACCTGTATTAGCTGGTGCTATTACTATATTATTAACAGATCGAAATCTTAATACTTCATTTTTTGATCCTGCAGGAGGTGGAGATCCTATTTTATATCAACATTTA

GU947642_Pmne_ITNEB01_Italy_Sicily ----------------------------------------------------------------------------------------------------------------------------------------------------------------------------------------------------------------------------------------------------------------------------CCCCTTCATTAACCTTATTAATTTCTAGAAGAATTGTAGAAAATGGAGCAGGAACTGGATGAACAGTTTACCCCCCTTTATCATCTAATATTGCTCATAGAGGAAGTTCAGTTGATTTAGCTATTTTTTCCTTACATTTAGCGGGAATTTCATCAATCTTAGGAGCTATTAATTTTATTACAACTATTATTAATATACGAATTAATCATATATCATTCGATCAAATACCTCTTTTTGTATGAGCAGTAGGAATTACTGCTTTACTTTTATTATTATCTTTACCTGTATTAGCTGGTGCTATTACTATATTATTAACAGATCGAAATCTTAATACTTCATTTTTTGATCCCGCAGGAGGTGGTGATCCTATTTTATACCAACATTTA

EU093018_Ca995 -----------------------------------------------------------------------------------------------------------------------------------------------------------------------------------------------------------TTTAATATTAGGAGCCCCAGATATAGCTTTTCCTCGAATAAATAATATAAGATTTTGATTACTGCCCCCCTCATTAACTTTATTAATTTCTAGAAGAATTGTAGAAAATGGAGCAGGAACAGGATGAACAGTTTATCCCCCTTTATCATCTAATATCGCTCATAGAGGTAGTTCAGTTGATTTAGCTATTTTTTCTTTACATTTAGCAGGAATTTCATCAATCTTAGGAGCTATTAATTTTATTACAACTATTATTAATATACGAATTAACCATATATCATTTGATCAAATACCTCTCTTTGTATGAGCAGTAGGAATTACTGCTTTACTTTTATTATTATCTTTACCTGTATTAGCTGGTGCTATTACTATATTATTAACAGATCGAAATCTTAATACTTCATTTTTTGATCCTGCAGGAGGTGGAGATCCTATTTTATATCAACATTTA

EU093017_Ch892 -----------------------------------------------------------------------------------------------------------------------------------------------------------------------------------------------------------TTTAATATTAGGAGCCCCAGATATAGCTTTCCCCCGAATAAATAATATAAGATTTTGATTACTACCCCCTTCATTAACCTTATTAATTTCTAGAAGAATTGTAGAAAATGGAGCAGGAACTGGATGAACAGTTTACCCCCCTTTATCATCTAATATTGCTCATAGAGGAAGTTCAGTTGATTTAGCTATTTTTTCCCTACATTTAGCGGGAATTTCATCAATCTTAGGAGCTATTAATTTTATTACAACTATTATCAATATACGAATTAATCATATATCATTCGATCAAATACCTCTTTTTGTATGAGCAGTAGGAATTACTGCTTTACTTTTATTATTATCCTTACCTGTATTAGCTGGTGCTATTACTATATTATTAACAGATCGAAATCTTAATACTTCATTTTTTGATCCAGCAGGAGGTGGTGATCCTATTTTATATCAACATTTA

EU093016_Tk889 -----------------------------------------------------------------------------------------------------------------------------------------------------------------------------------------------------------TTTAATATTAGGAGCCCCAGATATAGCTTTTCCTCGAATAAATAATATAAGATTTTGATTACTACCCCCCTCATTAACTTTATTAATTTCTAGAAGAATTGTAGAAAATGGAGCAGGAACAGGATGAACAGTTTATCCCCCTTTATCATCTAATATTGCTCATAGAATTAGTTCAGTTGATTTAGCTATTTTTTCTTTACATTTAGCAGGAATTTCATCAATCTTAGGAGCTATTAATTTTATTACAACTATTATTAATATACGAATTAATCATTTATCATTTGATCAAATACCCCTCTTTGTATGAGCAGTAGGAATTACTGCTTTACTTTTATTATTATCTTTACCTGTATTAGCTGGTGCTATTACTATATTATTAACAGATCGAAATCTTAATACTTCATTTTTTGATCCTGCAGGAGGTGGAGATCCTATTTTATATCAACATTTA

EU093015_It878 -----------------------------------------------------------------------------------------------------------------------------------------------------------------------------------------------------------TTTAATATTAGGAGCCCCAGATATAGCTTTCCCCCGAATAAATAATATAAGATTTTGATTACTACCCCCTTCATTAACCTTATTAATTTCTAGAAGAATTGTAGAAAATGGAGCAGGAACTGGATGAACAGTTTACCCCCCTTTATCATCTAATATTGCTCATAGAGGAAGTTCAGTTGATTTAGCTATTTTTTCCTTACATTTAGCGGGAATTTCATCAATCTTAGGAGCTATTAATTTTATTACAACTATTATTAATATACGAATTAATCATATATCATTCGATCAAATACCTCTTTTTGTATGAGCAGTAGGAATTACTGCTTTACTTTTATTATTATCTTTACCTGTATTAGCTGGTGCTATTACTATATTATTAACAGATCGAAATCTTAATACTTCATTTTTTGATCCAGCAGGAGGTGGTGATCCTATTTTATACCAACATTTA

EU093014_Hu875 -----------------------------------------------------------------------------------------------------------------------------------------------------------------------------------------------------------TTTAATATTAGGAGCCCCAGATATAGCTTTTCCTCGAATAAATAATATAAGATTTTGATTACTACCCCCCTCATTAACTTTATTAATTTCTAGAAGAATTGTAGAAAATGGAGCAGGAACAGGATGAACAGTTTATCCCCCTTTATCATCTAATATCGCTCATAGAGGTAGTTCAGTTGATTTAGCTATTTTTTCTTTACATTTAGCGGGAATTTCATCAATCTTAGGAGCTATTAATTTTATTACAACTATTATTAATATACGAATTAACCATATATCATTTGATCAAATACCTCTCTTTGTATGAGCAGTAGGAATTACTGCTTTACTTTTATTATTATCTTTACCTGTATTAGCTGGTGCTATTACTATATTATTAACAGATCGAAATCTTAATACTTCATTTTTTGATCCTGCAGGAGGTGGAGATCCTATTTTATATCAACATTTA

EU093013_Sk872_Cz_Slova -----------------------------------------------------------------------------------------------------------------------------------------------------------------------------------------------------------TTTAATATTAGGAGCCCCAGATATAGCTTTTCCTCGAATAAATAATATAAGATTTTGATTACTACCCCCCTCATTAACTTTATTAATTTCTAGAAGAATTGTAGAAAATGGAGCAGGAACAGGATGAACAGTTTATCCCCCTTTATCATCTAATATCGCTCATAGAGGTAGTTCAGTTGATTTAGCTATTTTTTCTTTACATTTGGCAGGAATTTCATCAATCTTAGGAGCTATTAATTTTATTACAACTATTATTAATATACGAATTAATCATATATCATTTGATCAAATACCTCTCTTTGTATGAGCAGTAGGAATTACTGCTTTACTTTTATTATTATCTTTACCTGTATTAGCTGGTGCTATTACTATATTATTAACAGATCGAAATCTTAATACTTCATTTTTTGATCCTGCAGGAGGTGGAGATCCTATTTTATATCAACATTTA

EU093011_Cz869 -----------------------------------------------------------------------------------------------------------------------------------------------------------------------------------------------------------TTTAATATTAGGAGCCCCAGATATAGCTTTTCCTCGAATAAATAATATAAGATTTTGATTACTACCCCCCTCATTAACTTTATTAATTTCTAGAAGAATTGTAGAAAATGGAGCAGGAACAGGATGAACAGTTTATCCCCCTTTATCATCTAATATTGCTCATAGAGGTAGTTCAGTTGATTTAGCTATTTTTTCTTTACATTTAGCAGGAATTTCATCAATCTTAGGAGCTATTAATTTTATTACAACTATTATTAATATACGAATTAACCATATATCATTTGATCAAATACCTCTCTTTGTATGAGCAGTAGGAATTACTGCTTTACTTTTATTATTATCTTTACCTGTATTAGCTGGTGTTATTACTATATTATTAACAGATCGAAATCTTAATACTTCATTTTTTGATCCTGCAGGAGGTGGAGATCCTATTTTATATCAACATTTA

EU093010_Ru_Bosnia_Fi_Bu_Hu_Bel_Po_Rom_Ukr_ -----------------------------------------------------------------------------------------------------------------------------------------------------------------------------------------------------------TTTAATATTAGGAGCCCCAGATATAGCTTTTCCTCGAATAAATAATATAAGATTTTGATTACTACCCCCCTCATTAACTTTATTAATTTCTAGAAGAATTGTAGAAAATGGAGCAGGAACAGGATGAACAGTTTATCCCCCTTTATCATCTAATATCGCTCATAGAGGTAGTTCAGTTGATTTAGCTATTTTTTCTTTACATTTAGCAGGAATTTCATCAATCTTAGGAGCTATTAATTTTATTACAACTATTATTAATATACGAATTAACCATATATCATTTGATCAAATACCTCTCTTTGTATGAGCAGTAGGAATTACTGCTTTACTTTTATTATTATCTTTACCTGTATTAGCTGGTGCTATTACTATATTATTAACAGATCGAAATCTTAATACTTCATTTTTTGATCCTGCAGGAGGTGGAGATCCTATTTTATATCAACATTTA

EU093009_Kz848 -----------------------------------------------------------------------------------------------------------------------------------------------------------------------------------------------------------TTTAATATTAGGGGCCCCAGATATAGCTTTTCCTCGAATAAATAATATAAGATTTTGATTATTACCCCCTTCATTAACTTTATTAATTTCTAGAAGAATTGTAGAAAATGGAGCAGGAACAGGATGAACAGTTTATCCCCCTTTATCATCTAATATCGCTCATAGAGGTAGTTCAGTTGATTTAGCTATTTTTTCTTTACATTTAGCAGGAATTTCATCAATCTTAGGAGCTATTAATTTTATTACAACTATTATTAATATACGAATTAATCATATATCATTTGATCAAATACCTCTCTTTGTATGAGCAGTAGGAATTACTGCTTTACTTTTATTACTATCTTTACCTGTATTAGCTGGTGCTATTACTATATTATTAACAGATCGAAATCTTAATACTTCATTTTTTGATCCTGCAGGAGGTGGAGATCCTATTTTATATCAACATTTA

EU093007_Fi810 -----------------------------------------------------------------------------------------------------------------------------------------------------------------------------------------------------------TTTAATATTAGGAGCCCCAGATATAGCCTTTCCTCGAATAAATAATATAAGATTTTGATTACTACCCCCCTCATTAACTTTATTAATTTCTAGAAGAATTGTAGAAAATGGAGCAGGAACAGGATGAACAGTTTATCCCCCTTTATCATCTAATATCGCTCATAGAGGTAGTTCAGTTGATTTAGCTATTTTTTCTTTACATTTAGCAGGAATTTCATCAATCTTAGGAGCTATTAATTTTATTACAACTATTATTAATATACGAATTAACCATATATCATTTGATCAAATACCTCTCTTTGTATGAGCAGTAGGAATTACTGCTTTACTTTTATTATTATCTTTACCTGTATTAGCTGGTGCTATTACTATATTATTAACAGATCGAAATCTTAATACTTCATTTTTTGATCCTGCAGGAGGTGGAGATCCTATTTTATATCAACATTTA

EU093004_Tu999 -----------------------------------------------------------------------------------------------------------------------------------------------------------------------------------------------------------TTTAATATTAGGAGCTCCAGATATAGCTTTTCCTCGAATAAATAACATAAGATTTTGATTACTCCCCCCTTCATTAACTTTATTAATTTCTAGAAGAATTGTAGAAAATGGAGCAGGAACAGGATGAACAGTTTATCCCCCTTTATCATCTAATATTGCTCATAGAGGTAGTTCAGTTGATTTAGCTATTTTTTCTTTACATTTAGCAGGAATTTCATCAATCTTAGGAGCTATTAATTTTATTACAACTATTATTAATATACGAATTAATAATATATCATTTGATCAAATACCTCTTTTTGTATGAGCAGTAGGAATTACTGCATTACTTTTATTATTATCTTTACCTGTATTAGCTGGTGCTATTACTATATTATTAACAGATCGAAATCTTAATACTTCATTTTTTGATCCCGCAGGAGGTGGAGATCCTATTTTATATCAACACTTA

EU093000_Bu961 -----------------------------------------------------------------------------------------------------------------------------------------------------------------------------------------------------------TTTAATATTAGGAGCCCCAGATATAGCTTTTCCTCGAATAAATAATATAAGATTTTGATTACTACCCCCCTCATTAACTTTATTAATTTCTAGAAGAATTGTAGAAAATGGAGCAGGAACAGGATGAACAGTTTATCCCCCTTTATCATCTAATATCGCTCATAGAGGTAGTTCAGTTGATTTAGCTATTTTTTCTTTACATTTAGCAGGAATTTCATCAATCTTAGGAGCTATTAATTTTATTACAACTATTATTAATATACGAATTAATCATATATCATTTGATCAAATACCTCTCTTTGTATGAGCAGTAGGAATTACTGCTTTACTTTTATTATTATCTTTACCTGTATTAGCTGGTGCTATTACTATATTATTAACAGATCGAAATCTTAATACTTCATTTTTTGATCCTGCAGGAGGTGGAGATCCTATTTTATATCAACATTTA

EU092998_Bu951 -----------------------------------------------------------------------------------------------------------------------------------------------------------------------------------------------------------TTTAATATTAGGAGCCCCAGATATAGCTTTTCCTCGAATAAATAATATAAGATTTTGATTACTACCCCCCTCATTAACTTTATTAATTTCTAGAAGAATTGTAGAAAATGGAGCAGGAACAGGATGAACAGTTTATCCCCCTTTATCATCTAATATCGCTCATAGTGGTAGTTCAGTTGATTTAGCTATTTTTTCTTTACATTTAGCAGGAATTTCATCAATCTTAGGAGCTATTAATTTTATTACAACTATTATTAATATACGAATTAACCATATATCATTTGATCAAATACCTCTCTTTGTATGAGCAGTAGGAATTACTGCTTTACTTTTATTATTATCTTTACCTGTATTAGCTGGTGCTATTACTATATTATTAACAGATCGAAATCTTAATACTTCATTTTTTGATCCTGCAGGAGGTGGAGATCCTATTTTATATCAACATTTA

EU092997_Ru940 -----------------------------------------------------------------------------------------------------------------------------------------------------------------------------------------------------------TTTAATATTAGGAGCCCCAGATATAGCTTTTCCTCGAATAAATAATATAAGATTTTGATTACTACCCCCCTCATTAACTTTATTAATTTCTAGAAGAATTGTAGAAAATGGAGCAGGAACAGGATGAACAGTTTATCCCCCTTTATCATCTAATATCGCTCATAGAGGTAGTTCAGTTGATTTAGCTATTTTTTCTTTACATTTAGCAGGAATTTCATCAATCTTAGGAGCTATTAATTTTATTACAACTATTATTAATATACGAATTAACCATATATCATTTGATCAAATACCTCTCTTTGTATGAGCAGTAGGAATTACTGCTTTACTTTTATTATTATCTCTACCTGTATTAGCTGGTGCTATTACTATATTATTAACAGATCGAAATCTTAATACTTCATTTTTTGATCCTGCAGGAGGTGGGGATCCTATTTTATATCAACATTTA

EU092996_Sp924_Fr -----------------------------------------------------------------------------------------------------------------------------------------------------------------------------------------------------------TTTAATATTAGGAGCCCCAGATATAGCTTTCCCCCGAATAAATAATATAAGATTTTGATTACTACCCCCTTCATTAACCTTATTAATTTCTAGAAGAATTGTAGAAAATGGAGCAGGAACTGGATGAACAGTTTACCCCCCTTTATCATCCAATATTGCTCATAGAGGAAGTTCAGTTGATTTAGCTATTTTTTCCCTACATTTAGCAGGAATTTCATCAATCTTAGGAGCTATTAATTTTATTACAACTATTATTAATATACGAATTAATCATATATCATTCGATCAAATACCTCTTTTTGTGTGAGCAGTAGGAATTACTGCTTTACTTTTATTATTATCCTTACCTGTATTAGCTGGTGCTATTACTATATTATTAACAGATCGAAATCTTAATACTTCATTTTTTGATCCAGCAGGAGGTGGTGATCCTATTTTATATCAACATTTA

EU092995_Sp923 -----------------------------------------------------------------------------------------------------------------------------------------------------------------------------------------------------------TTTAATATTAGGAGCCCCAGATATAGCTTTCCCCCGAATAAATAATATAAGATTTTGATTACTACCCCCTTCATTAACCTTATTAATTTCTAGAAGAATTGTAGAAAATGGAGCAGGAACTGGATGAACAGTTTATCCCCCTTTATCATCCAATATTGCTCATAGAGGAAGTTCAGTTGATTTAGCTATTTTTTCCCTACATTTAGCGGGAATTTCATCAATCTTAGGAGCTATTAATTTTATTACAACTATTATTAATATACGAATTAATCATATATCATTCGATCAAATACCTCTTTTTGTGTGAGCAGTAGGAATTACTGCTTTACTTTTATTATTATCCTTACCTGTATTAGCTGGTGCTATTACTATATTATTAACGGATCGAAATCTTAATACTTCATTTTTTGATCCAGCAGGAGGTGGTGATCCTATTTTATATCAACATTTA

EU092994_Sp921 -----------------------------------------------------------------------------------------------------------------------------------------------------------------------------------------------------------TTTAATATTAGGAGCCCCAGATATAGCTTTCCCCCGAATAAATAATATAAGATTTTGATTACTACCCCCTTCATTAACCTTATTAATTTCTAGAAGAATTGTAGAAAATGGAGCAGGAACTGGATGAACAGTTTACCCCCCTTTATCATCCAATATTGCTCATAGAGGAAGTTCAGTTGATTTAGCTATTTTTTCCCTACATTTAGCAGGAATTTCATCAATCTTAGGAGCTATTAATTTTATTACAACTATTATTAATATACGAATTAATCATATATCATTCGATCAAATACCTCTTTTTGTGTGAGCAGTAGGAATTACTGCTTTACTTTTATTATTATCCTTACCTGTATTAGCTGGTGCTATTACTATATTATTAACGGATCGAAATCTTAATACTTCATTTTTTGATCCAGCAGGAGGTGGTGATCCTATTTTATATCAACATTTA

EU092993_Sp917 -----------------------------------------------------------------------------------------------------------------------------------------------------------------------------------------------------------TTTAATATTAGGAGCCCCAGATATAGCTTTCCCCCGAATAAATAATATAAGATTTTGATTACTACCCCCTTCATTAACCTTATTAATTTCTAGAAGAATTGTAGAAAATGGAGCAGGAACTGGATGAACAGTTTATCCCCCTTTATCATCCAATATTGCTCATAGAGGAAGTTCAGTTGATTTAGCTATTTTTTCCCTACATTTAGCAGGAATTTCATCAATCTTAGGAGCTATTAATTTTATTACAACTATTATTAATATACGAATTAATCATATATCATTCGATCAAATACCTCTTTTTGTGTGAGCAGTAGGAATTACTGCTTTACTTTTATTATTATCCTTACCTGTATTAGCTGGTGCTATTACTATATTATTAACAGATCGAAATCTTAATACTTCATTTTTTGATCCAGCAGGAGGTGGTGATCCTATTTTATATCAACATTTA

EU092992_Sp916 -----------------------------------------------------------------------------------------------------------------------------------------------------------------------------------------------------------TTTAATATTAGGAGCCCCAGATATAGCTTTCCCCCGAATAAATAATATAAGATTTTGATTACTACCCCCTTCATTAACCTTATTAATTTCTAGAAGAATTGTAGAAAATGGAGCAGGAACTGGATGAACAGTTTACCCCCCTTTATCATCCAATATTGCTCATAGAGGAAGTTCAGTTGATTTAGCTATTTTTTCCCTACATTTAGCAGGAATTTCATCAATCTTAGGAGCTATTAATTTTATTACAACTATTATTAATATACGAATTAATCATATATCATTCGATCAAATACCTCTTTTTGTGTGAGCAGTAGGAATTACTGCTTTACTTTTATTATTATCCTTACCTGTATTAGCTGGTGCTATTACTATATTATTAACAGATCGAAATATTAATACTTCATTTTTTGATCCAGCAGGAGGTGGTGATCCTATTTTATATCAACATTTA

EU092991_Fr913 -----------------------------------------------------------------------------------------------------------------------------------------------------------------------------------------------------------TTTAATATTAGGAGCCCCAGATATAGCTTTCCCCCGAATAAATAATATAAGATTTTGATTACTACCCCCTTCATTAACCTTATTAATTTCTAGAAGAATTGTAGAAAATGGAGCAGGAACTGGATGAACAATTTACCCCCCTTTATCATCCAATATTGCTCATAGAGGAAGTTCAGTTGATTTAGCTATTTTTTCCCTACATTTAGCAGGAATTTCATCAATCTTAGGAGCTATTAATTTTATTACAACTATTATTAATATACGAATTAATCATATATCATTCGATCAAATACCTCTTTTTGTGTGAGCAGTAGGAATTACTGCTTTACTTTTATTATTATCCTTACCTGTATTAGCTGGTGCTATTACTATATTATTAACAGATCGAAATCTTAATACTTCATTTTTTGATCCAGCAGGAGGTGGTGATCCTATTTTATATCAACATTTA

EU092990_Fr911 -----------------------------------------------------------------------------------------------------------------------------------------------------------------------------------------------------------TTTAATATTAGGAGCCCCAGATATAGCTTTCCCCCGAATAAATAATATAAGATTTTGATTACTACCCCCTTCATTAACCTTATTAATTTCTAGAAGAATTGTAGAAAATGGAGCAGGAACTGGATGAACAGTTTACCCCCCTTTATCATCTAATATTGCTCATAGAGGAAGTTCAGTTGATTTAGCTATTTTTTCCTTACATTTAGCAGGAATTTCATCAATCTTAGGAGCTATTAATTTTATTACAACTATTATTAATATACGAATTAATCATATATCATTCGATCAAATACCTCTTTTTGTATGAGCAGTAGGAATTACTGCTTTACTTTTATTATTATCATTACCTGTATTAGCTGGTGCTATTACTATATTATTAACAGATCGAAATCTTAATACTTCATTTTTTGATCCAGCAGGGGGTGGTGATCCTATTTTATATCAACATTTA

EU092988_It639 -----------------------------------------------------------------------------------------------------------------------------------------------------------------------------------------------------------TTTAATATTAGGAGCCCCAGATATAGCTTTCCCCCGAATAAATAATATAAGATTTTGATTACTACCCCCTTCATTAACCTTATTAATTTCTAGAAGAATTGTAGAAAATGGAGCAGGAACTGGATGAACAGTTTACCCCCCTTTATCATCTAATATTGCTCATAGAGGAAGTTCAGTTGATTTAGCTATTTTTTCCCTACATTTAGCGGGAATTTCATCAATCTTAGGAGCTATTAATTTTATTACAACTATTATTAATATACGAATTAATCATATATCATTTGATCAAATACCTCTTTTTGTATGAGCAGTAGGAATTACTGCTTTACTTTTATTATTATCCTTACCTGTATTAGCTGGTGCTATTACTATATTATTAACAGATCGAAATCTTAATACTTCATTTTTTGATCCAGCAGGAGGTGGTGATCCTATTTTATATCAACATTTA

EU092987_Fr528 -----------------------------------------------------------------------------------------------------------------------------------------------------------------------------------------------------------TTTAATATTAGGAGCCCCAGATATAGCTTTCCCCCGAATAAATAATATAAGATTTTGATTACTACCCCCTTCATTAACCTTATTAATTTCTAGAAGAATTGTAGAAAATGGAGCAGGAACTGGATGAACAGTTTACCCCCCTTTATCATCTAATATTGCTCATAGAGGAAGTTCAGTTGATTTAGCTATTTTTTCCCTACATTTAGCGGGAATTTCATCAATCTTAGGAGCTATTAATTTTATTACAACTATTATTAATATACGAATTAATCATATATCATTCGATCAAATACCTCTTTTTGTATGAGCAGTAGGAATTACTGCTTTACTTTTATTATTATCCTTACCTGTATTAGCTGGTGCTATTACTATATTATTAACAGATCGAAATCTTAATACTTCATTTTTTGATCCAGCAGGAGGTGGTGATCCTATTTTATATCAACATTTA

EU092985_Fr525 -----------------------------------------------------------------------------------------------------------------------------------------------------------------------------------------------------------TTTAATATTAGGAGCCCCAGATATAGCTTTCCCCCGAATAAATAATATAAGATTTTGATTACTACCCCCTTCATTAACCTTATTAATTTCTAGAAGAATTGTAGAAAATGGAGCAGGAACTGGATGAACAGTTTACCCCCCTTTATCATCTAATATTGCTCATAGAGGAAGTTCAGTTGATTTAGCTATTTTTTCCTTACATTTAGCAGGAATTTCATCAATCTTAGGAGCTATTAATTTTATTACAACTATTATTAATATACGAATTAATCATATATCATTCGATCAAATACCTCTTTTTGTATGAGCAGTAGGAATTACTGCTTTACTTTTATTATTATCATTACCTGTATTAGCTGGTGCTATTACTATATTATTAACAGATCGAAATCTTAATACTTCATTTTTTGATCCAGCAGGAGGTGGTGATCCTATTTTATATCAACATTTA

EU092984_Fr522 -----------------------------------------------------------------------------------------------------------------------------------------------------------------------------------------------------------TTTAATATTAGGAGCCCCAGATATAGCTTTCCCCCGAATAAATAATATAAGATTTTGATTACTACCCCCTTCATTAACCTTATTAATTTCTAGAAGAATTGTAGAAAATGGAGCAGGAACTGGATGAACAGTTTACCCCCCTTTATCATCTAATATTGCTCATAGAGGAAGTTCAGTTGATTTAGCTATTTTTTCCTTACATTTAGCAGGAATTTCATCAATCTTAGGAGCTATTAATTTTATTACAACTATTATTAATATACGAATTAATCATATATCATTCGATCAAATACCTCTTTTTGTATGAGCAGTAGGAATTACTGCTTTACTCTTATTATTATCATTACCTGTATTAGCTGGTGCTATTACTATATTATTAACAGATCGAAATCTTAATACTTCATTTTTTGATCCAGCAGGGGGTGGTGATCCTATTTTATATCAACATTTA

EU092983_Ch765 -----------------------------------------------------------------------------------------------------------------------------------------------------------------------------------------------------------TTTAATATTAGGAGCCCCAGATATAGCTTTCCCCCGAATAAATAATATAAGATTTTGATTACTACCCCCTTCATTAACCTTATTAATTTCTAGAAGAATTGTAGAAAATGGAGCAGGAACTGGATGAACAGTTTACCCCCCTTTATCATCTAATATTGCTCATAGAGGAAGTTCAGTTGATTTAGCTATTTTTTCCCTACATTTAGCAGGAATTTCATCAATCTTAGGAGCTATTAATTTTATTACAACTATTATTAATATACGAATTAATCATATATCATTCGATCAAATACCTCTTTTTGTATGAGCAGTAGGAATTACTGCTTTACTTTTATTATTATCCTTACCTGTATTAGCTGGTGCTATTACTATATTATTAACAGATCGAAATCTTAATACTTCATTTTTTGATCCAGCAGGAGGTGGTGATCCTATTTTATATCAACATTTA

EU092982_Pl653_Slova_Ukr -----------------------------------------------------------------------------------------------------------------------------------------------------------------------------------------------------------TTTAATATTAGGAGCCCCAGATATAGCTTTTCCTCGAATAAATAATATAAGATTTTGATTACTACCCCCCTCATTAACTTTATTAATTTCTAGAAGAATTGTAGAAAATGGAGCAGGAACAGGATGAACAATTTATCCCCCTTTATCATCTAATATCGCTCATAGAGGTAGTTCAGTTGATTTAGCTATTTTTTCTTTACATTTAGCAGGAATTTCATCAATCTTAGGAGCTATTAATTTTATTACAACTATTATTAATATACGAATTAACCATATATCATTTGATCAAATACCTCTCTTTGTATGAGCAGTAGGAATTACTGCTTTACTTTTATTATTATCTTTACCTGTATTAGCTGGTGCTATTACTATATTATTAACAGATCGAAATCTTAATACTTCATTTTTTGATCCTGCAGGAGGTGGAGATCCTATTTTATATCAACATTTA

EU092981_At626 -----------------------------------------------------------------------------------------------------------------------------------------------------------------------------------------------------------TTTAATATTAGGAGCCCCAGATATAGCTTTTCCTCGAATAAATAATATAAGATTTTGATTACTACCCCCCTCATTAACTTTATTAATTTCTAGAAGAATTGTAGAAAATGGAGCAGGAACAGGATGAACAGTTTATCCCCCTTTATCATCTAATATCGCTCATAGAGGTAGTTCAGTTGATTTAGCTATTTTTTCTTTACATTTAGCAGGAATTTCATCAATCTTAGGAGCTATTAATTTTATTACAACTATTATTAATATACGAATTAACCATATATCATTTGATCAAATACCTCTCTTTGTATGAGCAGTAGGAATTACTGCTTTACTTTTATTATTATCTTTACCTGTGTTAGCTGGTGCTATTACTATATTATTAACAGATCGAAATCTTAATACTTCATTTTTTGATCCTGCAGGAGGTGGAGATCCTATTTTATATCAACATTTA

EU092980_At622 -----------------------------------------------------------------------------------------------------------------------------------------------------------------------------------------------------------TTTAATATTAGGAGCCCCAGATATAGCTTTTCCTCGAATAAATAATATAAGATTTTGATTACTACCCCCCTCATTAACTTTATTAATTTCTAGAAGAATTGTAGAAAATGGAGCAGGAACAGGATGAACAGTTTATCCCCCTTTATCATCTAATATTGCTCATAGAGGTAGTTCAGTTGATTTAGCTATTTTTTCTTTACATTTAGCAGGAATTTCATCAATCTTAGGAGCTATTAATTTTATTACAACTATTATTAATATACGAATTAACCATATATCATTTGATCAAATACCTCTCTTTGTATGAGCAGTAGGAATTACTGCTTTACTTTTATTACTATCTTTACCTGTATTAGCTGGTGCTATTACTATATTATTAACAGATCGAAATCTTAATACTTCATTTTTTGATCCTGCAGGAGGTGGAGATCCTATTTTATATCAACATTTA

EU092978_At618_At_Slo -----------------------------------------------------------------------------------------------------------------------------------------------------------------------------------------------------------TTTAATATTAGGAGCCCCAGATATAGCTTTTCCTCGAATAAATAATATAAGATTTTGATTACTACCCCCCTCATTAACTTTATTAATTTCTAGAAGAATTGTAGAAAATGGGGCAGGAACAGGATGAACAGTTTATCCCCCTTTATCATCTAATATCGCTCATAGAGGTAGTTCAGTTGATTTAGCTATTTTTTCTTTACATTTAGCAGGAATTTCATCAATCTTAGGAGCTATTAATTTTATTACAACTATTATTAATATACGAATTAACCATATATCATTTGATCAAATACCTCTCTTTGTATGAGCAGTAGGAATTACTGCTTTACTTTTATTATTATCTTTACCTGTATTAGCTGGTGCTATTACTATATTATTAACAGATCGAAATCTTAATACTTCATTTTTTGATCCTGCAGGAGGTGGAGATCCTATTTTATATCAACATTTA

EU092977_At606_At_Cz_D_Fi_Hu_Po_Slova -----------------------------------------------------------------------------------------------------------------------------------------------------------------------------------------------------------TTTAATATTAGGAGCCCCAGATATAGCTTTTCCTCGAATAAATAATATAAGATTTTGATTACTACCCCCCTCATTAACTTTATTAATTTCTAGAAGAATTGTAGAAAATGGAGCAGGAACAGGATGAACAGTTTATCCCCCTTTATCATCTAATATTGCTCATAGAGGTAGTTCAGTTGATTTAGCTATTTTTTCTTTACATTTAGCAGGAATTTCATCAATCTTAGGAGCTATTAATTTTATTACAACTATTATTAATATACGAATTAACCATATATCATTTGATCAAATACCTCTCTTTGTATGAGCAGTAGGAATTACTGCTTTACTTTTATTATTATCTTTACCTGTATTAGCTGGTGCTATTACTATATTATTAACAGATCGAAATCTTAATACTTCATTTTTTGATCCTGCAGGAGGTGGAGATCCTATTTTATATCAACATTTA

EU092976_At602 -----------------------------------------------------------------------------------------------------------------------------------------------------------------------------------------------------------TTTAATATTAGGAGCCCCAGATATAGCTTTTCCTCGAATAAATAATATAAGATTTTGATTACTACCCCCCTCATTAACTTTATTAATTTCTAGAAGAATTGTAGAAAATGGAGCAGGAACAGGATGAACAGTTTATCCCCCTTTATCATCTAATATTGCTCATAGAGGTAGTTCAGTTGATTTAGCTATTTTTTCTTTACATTTAGTAGGAATTTCATCAATCTTAGGAGCTATTAATTTTATTACAACTATTATTAATATACGAATTAACCATATATCATTTGATCAAATACCTCTCTTTGTATGAGCAGTAGGAATTACTGCTTTACTTTTATTATTATCTTTACCTGTATTAGCTGGTGCTATTACTATATTATTAACAGATCGAAATCTTAATACTTCATTTTTTGATCCTGCAGGAGGTGGAGATCCTATTTTATATCAACATTTA

EU092975_D757 -----------------------------------------------------------------------------------------------------------------------------------------------------------------------------------------------------------TTTAATATTAGGAGCCCCAGATATAGCTTTTCCTCGAATAAATAATATAAGATTTTGATTACTACCCCCCTCATTAACTTTATTAATTTCTAGAAGAATTGTAGAAAATGGAGCAGGAACAGGATGAACAGTTTATCTTCCTTTATCATCTAATATTGCTCATAGAGGTAGTTCAGTTGATTTAGCTATTTTTTCTTTACATTTAGCAGGAATTTCATCAATCTTAGGAGCTATTAATTTTATTACAACTATTATTAATATACGAATTAACCATATATCATTTGATCAAATACCTCTCTTTGTATGAGCAGTAGGAATTACTGCTTTACTTTTATTATTATCTTTACCTGTATTAGCTGGTGCTATTACTATATTATTAACAGATCGAAATCTTAATACTTCATTTTTTGATCCTGCAGGAGGTGGAGATCCTATTTTATATCAACATTTA

EU092974_D756 -----------------------------------------------------------------------------------------------------------------------------------------------------------------------------------------------------------TTTAATATTAGGAGCCCCAGATATAGCTTTTCCTCGAATAAATAATATAAGATTTTGATTACTACCCCCCTCATTAACTTTATTAATTTCTAGAAGAATTGTAGAAAATGGAGCAGGAACAGGATGAACAATTTATCCCCCTTTATCATCTAATATTGCTCATAGAGGTAGTTCAGTTGATTTAGCTATTTTTTCTTTACATTTAGCAGGAATTTCATCAATCTTAGGAGCTATTAATTTTATTACAACTATTATTAATATACGAATTAACCATATATCATTTGATCAAATACCTCTCTTTGTATGAGCAGTAGGAATTACTGCTTTACTTTTATTATTATCTTTACCTGTATTAGCTGGTGCTATTACTATATTATTAACAGATCGAAATCTTAATACTTCATTTTTTGATCCTGCAGGAGGTGGAGATCCTATTTTATATCAACATTTA

EU092973_D744 -----------------------------------------------------------------------------------------------------------------------------------------------------------------------------------------------------------TTTAATATTAGGAGCCCCAGATATAGCTTTTCCTCGAATAAATAATATAAGATTTTGATTACTACCCCCCTCATTAACTTTATTAATTTCTAGAAGAATTGTAGAAAATGGAGCAGGAACAGGATGAACGGTTTATCCCCCTTTATCATCTAATATTGCTCATAGAGGTAGTTCAGTTGATTTAGCTATTTTTTCTTTACATTTAGCAGGAATTTCATCAATCTTAGGAGCTATTAATTTTATTACAACTATTATTAATATACGAATTAACCATATATCATTTGATCAAATACCTCTCTTTGTATGAGCAGTAGGAATTACTGCTTTACTTTTATTATTATCTTTACCTGTATTAGCTGGTGCTATTACTATATTATTAACAGATCGAAATCTTAATACTTCATTTTTTGATCCTGCAGGAGGTGGAGATCCTATTTTATATCAACATTTA

EU092971_Hu697_Bu_Hu -----------------------------------------------------------------------------------------------------------------------------------------------------------------------------------------------------------TTTAATATTAGGAGCCCCAGATATAGCTTTTCCTCGAATAAATAATATAAGATTTTGATTACTACCCCCCTCATTAACTTTATTAATTTCTAGAAGAATTGTAGAAAATGGAGCAGGAACAGGATGAACAGTTTATCCCCCTTTATCATCTAATATCGCTCATAGAGGTAGTTCAGTTGATTTAGCTATTTTTTCTTTACATTTAGCAGGAATTTCATCAATCTTAGGAGCTATTAATTTTATTACAACTATTATTAATATACGAATTAACCATATATCATTTGATCAAATACCTCTCTTTGTATGAGCAGTAGGAATTACTGCTTTACTTTTATTATTATCTTTACCTGTATTAGCTGGTGCTATTACTATATTATTAACAGATCGAAATCTTAATACTTCATTTTTTGATCCTGCAGGAGGTGGAGATCCTATTTTATATCAACATTTA

EU092969_Bu775 -----------------------------------------------------------------------------------------------------------------------------------------------------------------------------------------------------------TTTAATATTAGGAGCCCCAGATATAGCTTTTCCTCGAATAAATAATATAAGATTTTGATTACTACCCCCCTCATTAACTTTATTAATTTCTAGAAGAATTGTAGAAAATGGAGCAGGAACAGGATGAACAATTTATCCCCCTTTATCATCTAATATCGCTCACAGAGGTAGTTCAGTTGATTTAGCTATTTTTTCTTTACATTTAGCAGGAATTTCATCAATCTTAGGAGCTATTAATTTTATTACAACTATTATTAATATACGAATTAACCATATATCATTTGATCAAATACCTCTCTTTGTATGAGCAGTAGGAATTACTGCTTTACTTTTATTATTATCTTTACCTGTATTAGCTGGTGCTATTACTATATTATTAACAGATCGAAATCTTAATACTTCATTTTTTGATCCTGCAGGAGGTGGAGATCCTATTTTATATCAACATTTA

EU092968_Bu772 -----------------------------------------------------------------------------------------------------------------------------------------------------------------------------------------------------------TTTAATATTAGGAGCCCCAGATATAGCTTTTCCTCGAATAAATAATATAAGATTTTGATTACTACCCCCCTCATTAACTTTATTAATTTCTAGAAGAATTGTAGAAAATGGAGCAGGAACAGGATGAACAGTTTATCCCCCTTTATCATCTAATATCGCTCATAGAGGTAGTTCAGTTGATTTAGCTATTTTTTCTTTACATTTAGCAGGAATTTCATCAATCTTAGGAGCTATTAATTTTATTACAACTATTATTAATATACGAATTAACCATATATCATTTGATCAAATACCTCTCTTTGTATGAGCAGTAGGAATTACTGCTTTACTTTTATTATTATCTCTACCTGTATTAGCTGGTGCTATTACTATATTATTAACAGATCGAAATCTTAATACTTCATTTTTTGATCCTGCAGGAGGTGGAGATCCTATTTTATATCAACATTTA

EU093003_D982 -----------------------------------------------------------------------------------------------------------------------------------------------------------------------------------------------------------TTTAATATTAGGAGCCCCAGATATAGCTTTTCCTCGAATAAATAATATAAGATTTTGATTACTACCCCCCTCATTAACTTTATTAATTTCTAGAAGAATTGTAGAAAATGGAGCAGGAACAGGATGAACAGTTTATCCCCCTTTATCATCTAATATTGCTCATAGAGGTAGTTCAGTTGATTTAGCTATTTTTTCTTTACATTTAGCAGGAATTTCATCAATCTTAGGAGCTATTAATTTTATTACAACTATTATTAATATACGAATTAACCATATATCATTTGATCAAATACCTCTCTTTGTATGGGCAGTAGGAATTACTGCTTTACTTTTATTATTATCTTTACCTGTATTAGCTGGTGCTATTACTATATTATTAACAGATCGAAATCTTAATACTTCATTTTTTGATCCTGCAGGAGGTGGAGATCCTATTTTATATCAACATTTA

DQ407769_UP_100_F ACATTATATTTTATTTTTGGTATTTGAGCAGGTATAGTAGGAACCTCTTTAAGATTATTAATTCGTACTGAATTAGGTAATCCTGGATCTTTAATTGGAGATGATCAAATTTATAACACTATTGTAACAGCTCATGCTTTTATTATAATTTTTTTTATAGTTATACCAATTATAATTGGAGGATTTGGAAATTGATTAATTCCTTTAATATTAGGAGCCCCAGATATAGCTTTCCCCCGAATAAATAATATAAGATTTTGATTACTACCCCCTTCATTAACCTTATTAATTTCTAGAAGAATTGTAGAAAATGGAGCAGGAACTGGATGAACAGTTTACCCCCCTTTATCATCTAATATTGCTCATAGAGGAAGTTCAGTTGATTTAGCTATTTTTTCCTTACATTTAGCAGGAATTTCATCAATCTTAGGAGCTATTAATTTTATTACAACTATTATTAATATACGAATTAATCATATATCATTCGATCAAATACCTCTTTTTGTATGAGCAGTAGGAATTACTGCTTTACTCTTATTATTATCATTACCTGTATTAGCTGGTGCTATTACTATATTATTAACAGATCGAAATCTTAATACTTCATTTTTTGATCCAGCAGGGGGTGGTGA----------------------

AM231426_W336_parvisi_Gre ACACTATATTTTATTTTTGGTATTTGAGCAGGTATAGTAGGAACCTCTTTAAGATTATTAATTCGTACTGAATTAGGTAATCCTGGATCTTTAATTGGAGATGATCAAATTTATAATACTATTGTAACAGCTCATGCTTTTATTATAATTTTTTTTATAGTTATACCAATTATAATTGGAGGATTTGGAAATTGATTAATTCCTTTAATATTAGGAGCCCCAGATATAGCTTTTCCTCGAATAAATAATATAAGATTTTGATTACTACCCCCCTCATTAACTTTATTAATTTCTAGAAGAATTG????????????????????GGATGAACAGTTTATCCCCCTTTATCATCTAATATCGCTCATAGAGGTAGTTCAGTTGATTTAGCTATTTTTTCTTTACATTTAGCAGGAATTTCATCAATCTTAGGGGCTATTAATTTTATTACAACTATTATTAATATACGAATTAACCATATATCATTTGATCAAATACCTCTCTTTGTATGAGCAGTAGGAATTACTGCTTTACTTTTATTATTATCTTTACCTGTATTAGCTGGTGCTATTACTATATTATTAACAGATCGAAATCTTAATACTTCATTTTTTGATCYTGCAGGAGGTGGAGATCCTATTTTATATCAA------

AM231425_W333_angorae_Tur ACACTATATTTTATTTTTGGTATTTGAGCAGGTATAGTAGGAACCTCTTTAAGATTATTAATTCGTACTGAATTAGGTAATCCTGGATCTTTAATTGGGGATGATCAAATTTATAATACTATTGTAACAGCTCATGCTTTTATTATAATTTTTTTTATAGTTATACCAATTATAATTGGAGGATTTGGAAATTGATTAATTCCTTTAATATTAGGAGCCCCAGATATAGCTTTTCCTCGAATAAATAATATAAGATTTTGATTATTACCCCCCTCATTAACTTTATTAATTTCTAGAAGAATTG????????????????????GGATGAACAGTTTATCCCCCTTTATCATCTAATATTTCTCATAGAGGTAGTTCAGTTGATTTAGCTATTTTTTCTTTACATTTAGCAGGAATTTCATCAATCTTAGGAGCTATTAATTTTATTACAACTATTATTAATATACGAATTAATCATATATCATTTGATCAAATACCCCTTTTTGTATGGGCAGTAGGAATTACTGCTTTACTTTTATTATTATCTTTACCTGTATTAGCTGGTGCTWTTACTATATTATTAACAGATCGAAATCTTAATACTTCATTTTTCGATCCCGCAGGAGGTGGGGATCCTATTTTATATCAA------

AM231424_W331_angorae_Tur_Ankara ACACTATATTTTATTTTTGGTATTTGAGCAGGTATAGTAGGAACCTCTTTAAGATTATTAATTCGTACTGAATTAGGTAATCCTGGATCTTTAATTGGAGATGATCAAATTTATAATACTATTGTAACAGCTCATGCTTTTATTATAATTTTTTTTATAGTTATACCAATTATAATTGGAGGATTTGGAAATTGATTAATTCCTTTAATATTAGGAGCCCCAGATATAGCTTTTCCTCGAATAAATAATATAAGATTTTGATTATTACCCCCCTCATTAACTTTATTAATTTCTAGAAGAATTGTA??????????????????GGATGAACAGTTTATCCCCCTTTATCATCTAATATCGCTCATAGAGGTAGCTCAGTTGATTTAGCTATTTTTTCTTTACATTTAGCAGGAATTTCATCAATCTTAGGAGCTATTAATTTTATTACAACTATTATTAATATACGAATTAACCATATATCATTTGATCAAATACCTCTCTTTGTATGAGCAGTAGGAATTACCGCTTTACTTTTATTATTATCTTTACCTGTATTAGCTGGTGCTATTACTATATTATTAACAGATCGAAATCTTAATACTTCATTTTTTGATCCTGCAGGAGGTGGAGATCCTATTTTATATCAA------

AM231423_W329_gigantea_Uzb_Chatkal ACACTATATTTTATTTTTGGTATTTGAGCAGGTATAGTAGGAACCTCTTTAAGATTATTAATTCGTACTGAATTAGGTAATCCTGGATCTTTAATTGGAGATGATCAAATTTATAATACTATTGTAACAGCTCATGCTTTTATTATAATTTTTTTTATAGTTATACCAATTATAATTGGAGGATTTGGAAATTGATTAATTCCTTTAATATTAGGAGCCCCAGATATAGCTTTTCCTCGAATAAATAATATAAGATTTTGATTATTACCCCCTTCATTAACTTTATTAATTTCTAGAAGAATTG????????????????????GGATGAACAGTTTATCCCCCTTTATCATCTAATATCGCTCATAGAGGTAGTTCAGTTGATTTAGCTATTTTTTCTTTACATTTAGCAGGAATTTCATCAATCTTAGGAGCTATTAATTTTATTACAACTATTATTAATATACGAATTAATCATATATCATTTGATCAAATACCTCTCTTTGTATGAGCAGTAGGAATTACTGCTTTACTTTTATTACTATCTTTACCTGTATTAGCTGGTGCTATTACTATATTATTAACAGATCGAAATCTTAATACTTCATTTTTTGATCCTGCAGGAGGTGGAGATCCTATTTTATATCAA------

AM231422_W330_orientalis_Zailijskiy ACACTATATTTTATTTTTGGTATTTGAGCAGGTATAGTAGGAACCTCTTTAAGATTATTAATTCGTACTGAATTAGGTAATCCTGGATCTTTAATTGGAGATGATCAAATTTATAATACTATTGTAACAGCTCATGCTTTTATTATAATTTTTTTTATAGTTATACCAATTATAATTGGAGGATTTGGAAATTGATTAATTCCTTTAATATTAGGGGCCCCAGATATAGCTTTTCCTCGAATAAATAATATAAGATTTTGATTATTACCCCCTTCATTAACTTTATTAATTTCTAGAAGAATTGTAGAAAATGGAGCAGGAACAGGATGAACAGTTTATCCCCCTTTATCATCTAATATCGCTCATAGAGGTAGTTCAGTTGATTTAGCTATTTTTTCTTTACATTTAGCGGGAATTTCATCAATCTTAGGAGCTATTAATTTTATTACAACTATTATTAATATACGAATTAATCATATATCATTTGATCAAATACCTCTCTTTGTATGAGCAGTAGGAATTACTGCTTTACTTTTATTACTATCTTTACCTGTATTAGCTGGTGCTATTACTATATTATTAACAGATCGAAATCTTAATACTTCATTTTTTGATCCTGCAGGAGGTGGAGATCCTATTTTATATCAA------

AM231421_W292_ochracea_Tadj_Zeravsh_ ACACTATATTTTATTTTTGGTATTTGAGCAGGTATAGTAGGAACCTCTTTAAGATTATTAATTCGTACTGAATTAGGTAATCCTGGATCTTTAATTGGAGATGATCAAATTTATAATACTATTGTAACAGCTCATGCTTTTATTATAATTTTTTTCATAGTTATACCAATTATAATTGGAGGATTTGGAAATTGATTAATTCCTTTAATATTAGGAGCCCCAGATATAGCTTTTCCTCGAATAAATAATATAAGATTTTGATTACTACCCCCTTCATTAACTTTATTAATTTCCAGAAGAATTGTAGAAAATGGAGCAGGAACAGGATGAACAGTTTATCCCCCTTTATCATCTAATATCGCTCATAGAGGTAGTTCAGTTGATTTAGCTATTTTTTCTTTACATTTAGCAGGAATTTCATCAATTTTAGGAGCTATTAATTTCATTACAACTATTATTAATATACGAATTAACCATATATCATTTGATCAAATACCCCTCTTTGTATGAGCAGTAGGAATTACTGCTTTACTTTTATTATTATCTTTACCTGTATTAGCTGGTGCTATTACTATATTATTAACAGATCGAAATCTTAATACTTCATTTTTTGATCCTGCAGG??GTGGAGATCCTATTTTATATCAA------

AM231420_W280_farsica_Iran_Fars ACACTATATTTTATTTTCGGTATTTGAGCAGGTATAGTAGGAACCTCTTTAAGATTATTAATTCGTACTGAATTAGGTAATCCTGGATCTTTAATTGGAGATGATCAAATTTATAATACTATTGTAACAGCTCATGCTTTTATTATAATCTTTTTTATAGTTATACCAATTATAATTGGAGGATTTGGAAATTGATTAATTCCTTTAATATTAGGAGCTCCAGATATAGCTTTCCCCCGAATAAATAATATAAGATTTTGATTACTCCCCCCCTCATTAACTTTATTAATTTCTAGAAGAATTGTAGAAAATGGAGCAGGAACAGGATGAACAGTTTACCCCCCTTTATCATCTAATATTGCCCACAGAGGTAGTTCAGTTGATTTAGCTATTTTTTCTTTACATTTAGCAGGAATTTCATCAATTTTAGGAGCTATTAATTTTATTACAACTATTATTAATATACGAATTAATTATATATCATTTGATCAAATACCTCTTTTTGTATGAGCAGTAGGAATTACAGCATTACTTTTATTATTATCTTTACCTGTATTAGCTGGTGCTATTACTATATTATTAACAGATCGAAATCTTAACACTTCATTTTTTGATCCTGCA????GTGGGGATCCTATTTTATATCAA------

AM231419_W311_pseudonubilosus_Iran_Urmia ACACTATATTTTATTTTCGGTATTTGAGCGGGTATAGTAGGAACCTCTTTAAGATTATTAATTCGTACTGAATTAGGTAATCCTGGATCTTTAATTGGAGATGATCAAATTTATAACACTATTGTAACAGCTCATGCTTTTATTATAATTTTTTTTATAGTTATACCAATTATAATTGGAGGATTTGGAAATTGATTAATTCCTTTAATATTAGGAGCTCCAGATATAGCTTTTCCTCGAATAAATAATATAAGATTTTGATTACTCCCCCCCTCATTAACTTTATTAATTTCTAGAAGAATTGTAGAAAATGGAGCAGGAACAGGATGAACAATTTATCCCCCTTTATCATCTAATATTGCTCATAGAGGTAGTTCAGTTGATTTAGCTATTTTTTCTTTACATTTAGCAGGAATTTCATCAATCTTAGGAGCTATTAATTTTATTACAACTATTATTAACATACGAATTAATCATATATCATTTGATCAAATACCTCTTTTTGTATGAGCAGTAGGAATTACTGCATTACTTTTATTATTATCTTTACCTGTATTAGCTGGTGCTATTACTATATTATTAACAGATCGAAATCTTAATACTTCATTTTTTGATCCTGCAGGA?GTGGAGATCCTATTTTATATCAA------

AM231418_W335_sheljuzhkoi_Tur_Adana ACACTATATTTTATTTTTGGTATTTGAGCAGGTATAGTAGGAACCTCTTTAAGATTATTAATTCGTACTGAATTAGGTAATCCTGGATCTTTAATTAGAGATGATCAAATTTATAATACTATTGTAACAGCTCATGCTTTTATTATAATTTTTTTTATAGTTATACCAATTATAATTGGAGGATTTGGAAATTGATTAATTCCTTTAATATTAGGAGCCCCAGATATAGCTTTTCCTCGAATAAATAATATAAGATTTTGATTACTTCCCCCTTCATTAACTTTATTAATTTCTAGAAGAATTG????????????????????GGATGAACAGTTTATCCCCCTTTATCATCTAATATTGCTCATAGAGGTAGTTCAGTTGATTTAGCTATTTTTTCTTTACATTTAGCAGGAATTTCATCAATCTTAGGAGCTATTAATTTTATTACAACTATTATTAATATACGAATTAATAATATATCATTTGATCAAATACCTCTTTTTGTATGAGCAGTAGGAATTACTGCATTACTTTTATTATTATCCCTACCTGTATTAGCTGGTGCTATTACTATATTATTAACAGATCGAAATCTTAATACTTCATTTTTTGATCCCGCAGGAGGTGGAGATCCTATTTTATATCAA------

AM231417_W78_parmenides_Fr ACATTATATTTTATTTTTGGTATTTGAGCAGGTATAGTAGGAACCTCTTTAAGATTATTAATTCGTACTGAATTAGGTAATCCTGGATCTTTAATTGGAGATGATCAAATTTATAATACTATTGTAACAGCTCATGCTTTTATTATAATTTTTTTTATAGTTATACCAATTATAATTGGAGGATTTGGAAATTGATTAATTCCTTTAATATTAGGAGCCCCAGATATAGCTTTCCCCCGAATAAATAATATAAGATTTTGATTACTACCCCCTTCATTAACCTTATTAATTTCTAGAAGAATTGTAGAAAATGGAGCAGGAACTGGATGAACAGTTTACCCCCCTTTATCATCTAATATTGCTCATAGAGGAAGTTCAGTTGATTTAGCTATTTTTTCCTTACATTTAGCAGGAATTTCATCAATCTTAGGAGCTATTAATTTTATTACAACTATTATTAATATACGAATTAATCATATATCATTCGATCAAATACCTCTTTTTGTATGAGCAGTAGGAATTACTGCTTTACTCTTATTATTATCATTACCTGTATTAGCTGGTGCTATTACTATATTATTAACAGATCGAAATCTTAATACTTCATTTTTTGATCCAGCAGGGGGTGGTGATCCTATTTTATATCAA------

EU836682_h_1_32_Rus ------------------------------------------------------------------------------------------------------------------------------------------------------------------------------------------------------------------------------------GCTTTTCCTCGAATAAATAATATAAGATTTTGATTACTACCCCCCTCATTAACTTTATTAATTTCTAGAAGAATTGTAGAAAATGGAGCAGGAACAGGATGAACAGTTTATCCCCCTTTATCATCTAATATCGCTCATAGAGGTAGTTCAGTTGATTTAGCTATTTTTTCTTTACATTTAGCAGGAATTTCATCAATCTTAGGAGCTATTAATTTTATTACAACTATTATTAATATACGAATTAACCATATATCATTTGATCAAATACCTCTCTTTGTATGAGCAGTAGGAATTACTGCTTTACTTTTATTATTATCTTTACCTGTATTAGCTGGTGCTATTACTATATTATTAACAGATCGAAATCTTAATACTTCATTTTTTGATCCTGCAGGAGGTGGGGATCCTATTTTATATCAACATTTA

EU836681_h_1_31_Rus ------------------------------------------------------------------------------------------------------------------------------------------------------------------------------------------------------------------------------------GCTTTTCCTCGAATAAATAATATAAGATTTTGATTACTACCCCCCTCATTAACTTTATTAATTTCTAGAAGAATTGTAGAAAATGGAGCAGGAACAGGATGAACAATTTATCCCCCTTTATCATCTAATATCGCTCATAGAGGTAGTTCAGTTGATTTAGCTATTTTTTCTTTACATTTAGCAGGAATTTCATCAATCTTAGGAGCTATTAATTTTATTACAACTATTATTAATATACGAATTAACCATATATCATTTGATCAAATACCTCTCTTTGTATGAGCAGTAGGAATTACTGCTTTACTTTTATTATTATCTTTACCTGTATTAGCTGGTGCTATTACTATATTATTAACAGATCGAAATCTTAATACTTCATTTTTTGATCCTGCAGGAGGTGGGGATCCTATTTTATATCAACATTTA

EU836680_A_Bo_Bu_Cr_Cz_Hu_Sl_Li_Fi_Po_Ru ------------------------------------------------------------------------------------------------------------------------------------------------------------------------------------------------------------------------------------GCTTTTCCTCGAATAAATAATATAAGATTTTGATTACTACCCCCCTCATTAACTTTATTAATTTCTAGAAGAATTGTAGAAAATGGAGCAGGAACAGGATGAACAGTTTATCCCCCTTTATCATCTAATATCGCTCATAGAGGTAGTTCAGTTGATTTAGCTATTTTTTCTTTACATTTAGCAGGAATTTCATCAATCTTAGGAGCTATTAATTTTATTACAACTATTATTAATATACGAATTAACCATATATCATTTGATCAAATACCTCTCTTTGTATGAGCAGTAGGAATTACTGCTTTACTTTTATTATTATCTTTACCTGTATTAGCTGGTGCTATTACTATATTATTAACAGATCGAAATCTTAATACTTCATTTTTTGATCCTGCAGGAGGTGGAGATCCTATTTTATATCAACATTTA

EU836675_h_1_19_It ------------------------------------------------------------------------------------------------------------------------------------------------------------------------------------------------------------------------------------GCTTTCCCTCGAATAAATAATATAAGATTTTGATTACTACCCCCCTCATTAACTTTATTAATTTCTAGAAGAATTGTAGAAAATGGAGCAGGAACAGGATGAACAGTTTATCCCCCTTTATCATCTAATATTGCTCATAGAGGTAGTTCAGTTGATTTAGCTATTTTTTCTTTACATTTAGCAGGAATTTCATCAATCTTAGGAGCTATTAATTTTATTACAACTATTATTAATATACGAATTAACCATATATCATTTGATCAAATACCTCTCTTTGTATGAGCAGTAGGAATTACTGCTTTACTTTTATTATTATCTTTACCTGTATTAGCTGGTGCTATTACTATATTATTAACAGATCGAAATCTTAATACTTCATTTTTTGATCCTGCAGGAGGTGGAGATCCTATTTTATATCAACATTTA

EU836674_h_1_18_At_It ------------------------------------------------------------------------------------------------------------------------------------------------------------------------------------------------------------------------------------GCTTTTCCTCGAATAAATAATATAAGATTTTGATTACTACCCCCCTCATTAACTTTATTAATTTCTAGAAGAATTGTAGAAAATGGAGCAGGAACAGGATGAACAGTTTATCCCCCTTTATCATCTAATATTGCTCATAGAGGTAGTTCAGTTGATTTAGCTATTTTTTCTTTACATTTAGCAGGAATTTCATCAATCTTAGGAGCTATTAATTTTATTACAACTATTATTAATATACGAATTAACCATATATCATTTGATCAAATACCTCTCTTTGTATGAGCAGTAGGAATTACTGCTTTACTTTTATTATTATCTTTACCTGTATTAGCTGGTGCTATTACTATATTATTAACAGATCGAAATCTTAATACTTCATTTTTTGATCCTGCAGGAGGTGGAGATCCTATTTTATATCAACATTTA

EU836672_h_1_10_It ------------------------------------------------------------------------------------------------------------------------------------------------------------------------------------------------------------------------------------GCTTTCCCTCGAATAAATAATATAAGATTTTGATTACTACCCCCCTCATTAACTTTATTAATTTCTAGAAGAATTGTAGAAAATGGGGCAGGAACAGGATGAACAGTTTATCCCCCTTTATCATCTAATATCGCTCATAGAGGTAGTTCAGTTGATTTAGCTATTTTTTCTTTACATTTAGCAGGAATTTCATCAATCTTAGGAGCTATTAATTTTATTACAACTATTATTAATATACGAATTAACCATATATCATTTGATCAAATACCTCTCTTTGTATGAGCAGTAGGAATTACTGCTTTACTTTTATTATTATCTTTACCTGTATTAGCTGGTGCTATTACTATATTATTAACAGATCGAAATCTTAATACTTCATTTTTTGATCCTGCAGGAGGTGGAGATCCTATTTTATATCAACATTTA

EU836671_h_1_09_It ------------------------------------------------------------------------------------------------------------------------------------------------------------------------------------------------------------------------------------GCTTTTCCTCGAATAAATAATATAAGATTTTGATTACTACCCCCCTCATTAACTTTATTAATTTCTAGAAGAATTGTAGAAAATGGGGCAGGAACAGGATGAACAGTTTATCCCCCTTTATCATCTAATATCGCTCATAGAGGTAGTTCAGTTGATTTAGCTATTTTTTCTTTACATTTAGCAGGAATTTCATCAATCTTAGGAGCTATTAATTTTATTACAACTATTATTAATATACGAATTAACCATATATCATTTGATCAAATACCTCTCTTTGTATGAGCAGTAGGAATTACTGCTTTACTTTTATTATTATCTTTACCTGTATTAGCTGGTGCTATTACTATATTATTAACAGATCGAAATCTTAATACTTCATTTTTTGATCCTGCAGGAGGTGGAGATCCTATTTTATATCAACATTTA

EU836670_h_1_07_Gre ------------------------------------------------------------------------------------------------------------------------------------------------------------------------------------------------------------------------------------GCTTTTCCTCGAATAAATAATATAAGATTTTGATTACTACCCCCCTCATTAACTTTATTAATTTCTAGAAGAATTGTAGAAAATGGAGCAGGAACAGGATGAACAATTTATCCCCCTTTATCATCTAATATCGCTCATAGAGGTAGTTCAGTTGATTTAGCTATTTTTTCTTTACATTTAGCAGGAATTTCATCAATCTTAGGGGCTATTAATTTTATTACAACTATTATTAATATACGAATTAACCATATATCATTTGATCAAATACCTCTCTTTGTATGAGCAGTAGGAATTACTGCTTTACTTTTATTATTATCTTTACCTGTATTAGCTGGTGCTATTACTATATTATTAACAGATCGAAATCTTAATACTTCATTTTTTGATCCTGCAGGAGGTGGAGATCCTATTTTATATCAACATTTA

EU836669_h_1_06_Gre ------------------------------------------------------------------------------------------------------------------------------------------------------------------------------------------------------------------------------------GCTTTCCCTCGAATAAATAATATAAGATTTTGATTACTACCCCCCTCATTAACTTTATTAATTTCTAGAAGAATTGTAGAAAATGGAGCAGGAACAGGATGAACAGTTTATCCCCCTTTATCATCTAATATAGCTCATAGAGGTAGTTCAGTTGATTTAGCTATTTTTTCTTTACATTTAGCAGGAATTTCATCAATCTTAGGAGCTATTAATTTTATTACAACTATTATTAATATACGAATTAACCATATATCATTTGATCAAATACCTCTCTTTGTATGAGCAGTAGGAATTACTGCTTTACTTTTATTATTATCTTTACCTGTATTAGCTGGTGCTATTACTATATTATTAACAGATCGAAATCTTAATACTTCATTTTTTGATCCTGCAGGAGGTGGAGATCCTATTTTATATCAACATTTA

EU836668_h_1_05_Gre ------------------------------------------------------------------------------------------------------------------------------------------------------------------------------------------------------------------------------------GCTTTCCCTCGAATAAATAATATAAGATTTTGATTACTACCCCCCTCATTAACTTTATTAATTTCTAGAAGAATTGTAGAAAATGGAGCAGGAACAGGATGAACAGTTTATCCCCCTTTATCATCTAATATCGCTCATAGAGGTAGTTCAGTTGATTTAGCTATTTTTTCTTTACATTTAGCAGGAATTTCATCAATCTTAGGGGCTATTAATTTTATTACAACTATTATTAATATACGAATTAACCATATATCATTTGATCAAATACCTCTCTTTGTATGAGCAGTAGGAATTACTGCTTTACTTTTATTATTATCTTTACCTGTATTAGCTGGTGCTATTACTATATTATTAACAGATCGAAATCTTAATACTTCATTTTTTGATCCTGCAGGAGGTGGAGATCCTATTTTATATCAACATTTA

EU836667_h_1_04_Gre ------------------------------------------------------------------------------------------------------------------------------------------------------------------------------------------------------------------------------------GCTTTCCCTCGAATAAATAATATAAGATTTTGATTACTACCCCCCTCATTAACTTTATTAATTTCTAGAAGAATTGTAGAAAATGGAGCAGGAACAGGATGAACAGTTTATCCCCCTTTATCATCTAATATCGCTCATAGAGGTAGTTCAGTTGATTTAGCTATTTTTTCTTTACATTTAGCAGGAATTTCATCAATCTTAGGGGCTATTAATTTTATTACAACTATTATTAATATACGAATTAACCATATATCATTTGATCAAATACCTCTCTTTGTATGAGCAGTAGGAATTACTGCTTTACTTTTATTATTATCTTTACCCGTATTAGCTGGTGCTATTACTATATTATTAACAGATCGAAATCTTAATACTTCATTTTTTGATCCTGCAGGAGGTGGAGATCCTATTTTATATCAACATTTA

EU836666_h_1_03_Mac ------------------------------------------------------------------------------------------------------------------------------------------------------------------------------------------------------------------------------------GCTTTTCCTCGAATAAATAATATAAGATTTTGATTACTACCCCCCTCATTAACTTTATTAATTTCTAGAAGAATTGTAGAAAATGGAGCAGGAACAGGATGAACAGTTTATCCCCCTTTATCATCTAATATCGCTCATAGAGGTAGTTCAGTTGATTTAGCTATTTTTTCTTTACATTTAGCGGGAATTTCATCAATCTTAGGGGCTATTAATTTTATTACAACTATTATTAATATACGAATTAACCATATATCATTTGATCAAATACCTCTCTTTGTATGAGCAGTAGGAATTACTGCTTTACTTTTATTATTATCTTTACCTGTATTAGCTGGTGCTATTACTATATTATTAACAGATCGAAATCTTAATACTTCATTTTTTGATCCTGCAGGAGGTGGAGATCCTATTTTATATCAACATTTA

EU836665_h_1_02_Gre_Mac ------------------------------------------------------------------------------------------------------------------------------------------------------------------------------------------------------------------------------------GCTTTTCCTCGAATAAATAATATAAGATTTTGATTACTACCCCCCTCATTAACTTTATTAATTTCTAGAAGAATTGTAGAAAATGGAGCAGGAACAGGATGAACAGTTTATCCCCCTTTATCATCTAATATCGCTCATAGAGGTAGTTCAGTTGATTTAGCTATTTTTTCTTTACATTTAGCAGGAATTTCATCAATCTTAGGGGCTATTAATTTTATTACAACTATTATTAATATACGAATTAACCATATATCATTTGATCAAATACCTCTCTTTGTATGAGCAGTAGGAATTACTGCTTTACTTTTATTATTATCTTTACCTGTATTAGCTGGTGCTATTACTATATTATTAACAGATCGAAATCTTAATACTTCATTTTTTGATCCTGCAGGAGGTGGAGATCCTATTTTATATCAACATTTA

EU836664_h_2_06_At_It ------------------------------------------------------------------------------------------------------------------------------------------------------------------------------------------------------------------------------------GCTTTTCCTCGAATAAATAATATAAGATTTTGATTGCTACCCCCCTCATTAACTTTATTAATTTCTAGAAGAATTGTAGAAAATGGAGCAGGAACAGGATGAACAGTTTATCCCCCTTTATCATCTAATATCGCTCATAGAGGTAGTTCAGTTGATTTAGCTATTTTTTCTTTACATTTAGCAGGAATTTCATCAATCTTAGGAGCTATTAATTTTATTACAACTATTATTAATATACGAATTAACCATATATCATTTGATCAAATACCTCTCTTTGTATGAGCAGTAGGAATTACTGCTTTACTTTTATTATTATCTTTACCTGTATTAGCTGGTGCTATTACTATATTATTAACAGATCGAAATCTTAATACTTCATTTTTTGATCCTGCAGGAGGTGGAGATCCTATTTTATATCAACATTTA

EU836663_h_2_05_It ------------------------------------------------------------------------------------------------------------------------------------------------------------------------------------------------------------------------------------GCTTTCCCTCGAATAAATAATATAAGATTTTGATTGCTACCCCCCTCATTAACTTTATTAATTTCTAGAAGAATTGTAGAAAATGGAGCAGGAACAGGATGAACAGTTTATCCCCCTTTATCATCTAATATCGCTCATAGAGGTAGTTCAGTTGATTTAGCTATTTTTTCTTTACATTTAGCAGGAATTTCATCAATCTTAGGAGCTATTAATTTTATTACAACTATTATTAATATACGAATTAACCATATATCATTTGATCAAATACCTCTCTTTGTATGAGCAGTAGGAATTACTGCTTTACTTTTATTATTATCTTTACCTGTATTAGCTGGTGCTATTACTATATTATTAACAGATCGAAATCTTAATACTTCATTTTTTGATCCTGCAGGAGGTGGAGATCCTATTTTATATCAACATTTA;

END;

begin mrbayes;

set autoclose=yes nowarn=yes;

partition ancstates = 2: 1, 2-655;

set partition=ancstates;

lset applyto=(2) rates=invgamma nst=6;

unlink statefreq=(all) revmat=(all) shape=(all) pinvar=(all);

prset ratepr=variable;

constraint mnemosyne_clade2=LOWAM001_Kyrgyzstan_Alai_10 LOWAM004_Uzbekistan_Gissar_38 LOWAM007_Kyrgyzstan_TianShan24 LOWAM009_Kyrgyzstan_TianShan_6 LOWAM013_Turkey_Georgia_3 LOWAM014_Turkey_Ovitdagi_1 LOWAM015_Don_Borisovka_Saratov LOWAM018_Kyrgyzstan_Karamyk LOWAM019_Kyrgyzstan_Karamyk LOWAM021_Russia_Saratov LOWAM023_Saratov_Luga_Vologda_4 LOWAM027_Kazakhstan_Karatau_2 LOWAM037_Russia_Pskovskaya LOWAM038_Kyrgyzstan_Tjuz_Ashu_3 LOWAM039_Kyrgyzstan_23 LOWAM044_Russia_Borisovra_3 LOWAM045_Tajikistan_Shakhristan_3 LOWAM067_Kazakhstan_Kaindy_1 LOWAM069_Russia_Teberda_2 LOWAM073_Kyrgyzstan_Takhtalyk1 LOWAM074_Kyrgyzstan_Naryntoo LOWAM086_Turkmenistan_3 LOWAM087_Uzbekistan_Sarchashma LOWAM095_Kyrgyzstan_Sosnovka LOWAM096_Gissar_5 LOWAM098_Tajikistan_Khondiza1 LOWAM099_Uzbekistan_Kamchik_2 LOWAM100_Kyrgyzstan_Konduk LOWAM115_Azerbaijan_Nyus_Nyus LOWAM116_Iran_Dizin_2 LOWAM122_Russia_Saratow_1 LOWAM136_Uzbekistan_Tamshush_1 LOWAM149_Kyrgyzstan_Songkel_1 LOWAM198_Turkey_Aladaglar_2 LOWAM213_Tajikistan_Tandukul_1 Parnassius_stubbendorfii_2005_LOWA_815 Parnassius_stubbendorfii_2005_LOWA_154 Parnassius_stubbendorfii_2005_LOWA_153 Parnassius_ariadne_ariadne Parnassius_glacialis_mikado Parnassius_stubbendorfii_hoenei Parnassius_stubbendorfii_hoenei_AC20_16 Parnassius_stubbendorfii_koreanus Parnassius_ariadne_AC4_14 HQ004911_RV_07_C107_Romania HQ004908_RV_07_D060_Romania HQ004907_RV_08_M274_Romania HQ004902_RV_08_M361_Romania GU947642_Pmne_ITNEB01_Italy_Sicily EU093018_Ca995 EU093017_Ch892 EU093016_Tk889 EU093015_It878 EU093014_Hu875 EU093013_Sk872_Cz_Slova EU093011_Cz869 EU093010_Ru_Bosnia_Fi_Bu_Hu_Bel_Po_Rom_Ukr_ EU093009_Kz848 EU093007_Fi810 EU093004_Tu999 EU093000_Bu961 EU092998_Bu951 EU092997_Ru940 EU092996_Sp924_Fr EU092995_Sp923 EU092994_Sp921 EU092993_Sp917 EU092992_Sp916 EU092991_Fr913 EU092990_Fr911 EU092988_It639 EU092987_Fr528 EU092985_Fr525 EU092984_Fr522 EU092983_Ch765 EU092982_Pl653_Slova_Ukr EU092981_At626 EU092980_At622 EU092978_At618_At_Slo EU092977_At606_At_Cz_D_Fi_Hu_Po_Slova EU092976_At602 EU092975_D757 EU092974_D756 EU092973_D744 EU092971_Hu697_Bu_Hu EU092969_Bu775 EU092968_Bu772 EU093003_D982 DQ407769_UP_100_F AM231426_W336_parvisi_Gre AM231425_W333_angorae_Tur AM231424_W331_angorae_Tur_Ankara AM231423_W329_gigantea_Uzb_Chatkal AM231422_W330_orientalis_Zailijskiy AM231421_W292_ochracea_Tadj_Zeravsh_ AM231420_W280_farsica_Iran_Fars AM231419_W311_pseudonubilosus_Iran_Urmia AM231418_W335_sheljuzhkoi_Tur_Adana AM231417_W78_parmenides_Fr EU836682_h_1_32_Rus EU836681_h_1_31_Rus EU836680_A_Bo_Bu_Cr_Cz_Hu_Sl_Li_Fi_Po_Ru EU836675_h_1_19_It EU836674_h_1_18_At_It EU836672_h_1_10_It EU836671_h_1_09_It EU836670_h_1_07_Gre EU836669_h_1_06_Gre EU836668_h_1_05_Gre EU836667_h_1_04_Gre EU836666_h_1_03_Mac EU836665_h_1_02_Gre_Mac EU836664_h_2_06_At_It EU836663_h_2_05_It;

prset topologypr=constraints(mnemosyne_clade2);

report applyto=(1) ancstates=yes;

mcmcp ngen= 100000 relburnin=yes burninfrac=0.25 printfreq=100 samplefreq=100 nchains=4 savebrlens=yes;

mcmc;

sump;

end;

**Alignment and command block for reconstruction of the ancestral states in the clade (3) (*stubbendorfii*+*glacialis*+*hoenei*)]**

#NEXUS

BEGIN DATA;

DIMENSIONS NTAX=125 NCHAR=655;

format datatype=mixed(standard:1,DNA:2-655) interleave=yes gap=- missing=?;

MATRIX

Parnassius_orleans_AC10_5 0

LOWAM001_Kyrgyzstan_Alai_10 1

LOWAM004_Uzbekistan_Gissar_38 1

LOWAM007_Kyrgyzstan_TianShan24 1

LOWAM009_Kyrgyzstan_TianShan_6 1

LOWAM013_Turkey_Georgia_3 1

LOWAM014_Turkey_Ovitdagi_1 1

LOWAM015_Don_Borisovka_Saratov 1

LOWAM018_Kyrgyzstan_Karamyk 1

LOWAM019_Kyrgyzstan_Karamyk 1

LOWAM021_Russia_Saratov 1

LOWAM023_Saratov_Luga_Vologda_4 1

LOWAM027_Kazakhstan_Karatau_2 1

LOWAM037_Russia_Pskovskaya 1

LOWAM038_Kyrgyzstan_Tjuz_Ashu_3 1

LOWAM039_Kyrgyzstan_23 1

LOWAM044_Russia_Borisovra_3 1

LOWAM045_Tajikistan_Shakhristan_3 1

LOWAM067_Kazakhstan_Kaindy_1 1

LOWAM069_Russia_Teberda_2 1

LOWAM073_Kyrgyzstan_Takhtalyk1 1

LOWAM074_Kyrgyzstan_Naryntoo 1

LOWAM086_Turkmenistan_3 1

LOWAM087_Uzbekistan_Sarchashma 1

LOWAM095_Kyrgyzstan_Sosnovka 1

LOWAM096_Gissar_5 1

LOWAM098_Tajikistan_Khondiza1 1

LOWAM099_Uzbekistan_Kamchik_2 1

LOWAM100_Kyrgyzstan_Konduk 1

LOWAM115_Azerbaijan_Nyus_Nyus 1

LOWAM116_Iran_Dizin_2 1

LOWAM122_Russia_Saratow_1 1

LOWAM136_Uzbekistan_Tamshush_1 1

LOWAM149_Kyrgyzstan_Songkel_1 1

LOWAM198_Turkey_Aladaglar_2 1

LOWAM213_Tajikistan_Tandukul_1 1

Parnassius_clodius 0

Parnassius_eversmanni_2005_LOWA_108 0

Parnassius_eversmanni_2005_LOWA_107 0

Parnassius_stubbendorfii_2005_LOWA_815 1

Parnassius_stubbendorfii_2005_LOWA_154 1

Parnassius_stubbendorfii_2005_LOWA_153 1

Parnassius_nordmanni 0

Parnassius_eversmanni 0

Parnassius_eversmanni_felderi 0

Parnassius_ariadne_ariadne 0

Parnassius_glacialis_mikado 1

Parnassius_stubbendorfii_hoenei 1

Parnassius_stubbendorfii_hoenei_AC20_16 1

Parnassius_stubbendorfii_koreanus 1

Parnassius_nordmanni_AC20_5 0

Parnassius_eversmanni_felderi_AC23_68 0

Parnassius_eversmanni_eversmanni_AC1_14 0

Parnassius_clodius_AC4_5 0

Parnassius_ariadne_AC4_14 0

HQ004911_RV_07_C107_Romania 1

HQ004908_RV_07_D060_Romania 1

HQ004907_RV_08_M274_Romania 1

HQ004902_RV_08_M361_Romania 1

GU947642_Pmne_ITNEB01_Italy_Sicily 1

EU093018_Ca995 1

EU093017_Ch892 1

EU093016_Tk889 1

EU093015_It878 1

EU093014_Hu875 1

EU093013_Sk872_Cz_Slova 1

EU093011_Cz869 1

EU093010_Ru_Bosnia_Fi_Bu_Hu_Bel_Po_Rom_Ukr_ 1

EU093009_Kz848 1

EU093007_Fi810 1

EU093004_Tu999 1

EU093000_Bu961 1

EU092998_Bu951 1

EU092997_Ru940 1

EU092996_Sp924_Fr 1

EU092995_Sp923 1

EU092994_Sp921 1

EU092993_Sp917 1

EU092992_Sp916 1

EU092991_Fr913 1

EU092990_Fr911 1

EU092988_It639 1

EU092987_Fr528 1

EU092985_Fr525 1

EU092984_Fr522 1

EU092983_Ch765 1

EU092982_Pl653_Slova_Ukr 1

EU092981_At626 1

EU092980_At622 1

EU092978_At618_At_Slo 1

EU092977_At606_At_Cz_D_Fi_Hu_Po_Slova 1

EU092976_At602 1

EU092975_D757 1

EU092974_D756 1

EU092973_D744 1

EU092971_Hu697_Bu_Hu 1

EU092969_Bu775 1

EU092968_Bu772 1

EU093003_D982 1

DQ407769_UP_100_F 1

AM231426_W336_parvisi_Gre 1

AM231425_W333_angorae_Tur 1

AM231424_W331_angorae_Tur_Ankara 1

AM231423_W329_gigantea_Uzb_Chatkal 1

AM231422_W330_orientalis_Zailijskiy 1

AM231421_W292_ochracea_Tadj_Zeravsh_ 1

AM231420_W280_farsica_Iran_Fars 1

AM231419_W311_pseudonubilosus_Iran_Urmia 1

AM231418_W335_sheljuzhkoi_Tur_Adana 1

AM231417_W78_parmenides_Fr 1

EU836682_h_1_32_Rus 1

EU836681_h_1_31_Rus 1

EU836680_A_Bo_Bu_Cr_Cz_Hu_Sl_Li_Fi_Po_Ru 1

EU836675_h_1_19_It 1

EU836674_h_1_18_At_It 1

EU836672_h_1_10_It 1

EU836671_h_1_09_It 1

EU836670_h_1_07_Gre 1

EU836669_h_1_06_Gre 1

EU836668_h_1_05_Gre 1

EU836667_h_1_04_Gre 1

EU836666_h_1_03_Mac 1

EU836665_h_1_02_Gre_Mac 1

EU836664_h_2_06_At_It 1

EU836663_h_2_05_It 1

Parnassius_orleans_AC10_5 ------------------------TGAGCAGGTATAATAGGAACCTCTTTAAGATTATTAATTCGTACTGAATTAGGTAATCCTGGATCTTTAATTGGAGATGATCAAATTTATAACACTATTGTAACAGCTCATGCTTTTATTATAATTTTTTTTATAGTTATACCAATTATAATTGGAGGATTTGGAAATTGATTAATTCCATTAATATTAGGAGCCCCAGATATAGCTTTCCCCCGAATAAATAATATAAGATTTTGACTATTACCCCCCTCATTAACCTTATTAATTTCCAGAAGAATCGTAGAAAATGGAGCAGGAACTGGATGAACAGTTTATCCCCCTTTATCCTCTAATATTGCCCATAGTGGAAGATCAGTTGATTTAGCTATCTTTTCTTTACATTTAGCTGGAATTTCATCTATTTTAGGAGCTATTAATTTTATTACAACTATTATTAATATACGAATTAATCATATATCATTTGATCAAATACCCCTTTTCGTATGAGCAGTAGGAATTACTGCTTTACTTTTATTATTATCTTTACCTGTTTTAGCAGGTGCTATTACTATACTTCTTACAGATCGAAATCTTAATACTTCATTTTTTGATCCAGCAGGAGGTGGAGATCCTATTTTATACCAACATTTA

LOWAM001_Kyrgyzstan_Alai_10 ACACTATATTTTATTTTTGGTATTTGAGCAGGTATAGTAGGAACCTCTTTAAGATTATTAATTCGTACTGAATTAGGTAATCCTGGATCTTTAATTGGAGATGATCAAATTTATAATACTATTGTAACAGCTCATGCTTTTATTATAATTTTTTTCATAGTTATACCAATTATAATTGGAGGATTTGGAAATTGATTAATTCCTTTAATATTAGGAGCCCCAGATATAGCTTTTCCTCGAATAAATAATATAAGATTTTGATTACTACCCCCTTCATTAACTTTATTAATTTCTAGAAGAATTGTAGAAAATGGAGCAGGAACAGGATGAACAGTTTATCCCCCTTTATCATCTAATATCGCTCATAGAGGTAGTTCAGTTGATTTAGCTATTTTTTCTTTACATTTAGCAGGAATTTCATCAATTTTAGGAGCTATTAATTTCATTACAACTATTATTAATATACGAATTAACCATATATCATTTGATCAAATACCCCTCTTTGTATGAGCAGTAGGAATTACTGCTTTACTTTTATTATTATCTTTACCTGTATTAGCTGGTGCTATTACTATATTATTAACAGATCGAAATCTTAATACTTCATTTTTTGATCCTGCAGGAGGTGGAGATCCTATTTTATATCAACATTTA

LOWAM004_Uzbekistan_Gissar_38 ACACTATATTTTATTTTTGGTATTTGAGCAGGTATAGTAGGAACCTCTTTAAGATTATTAATTCGTACTGAATTAGGTAATCCTGGATCTTTAATTGGAGATGATCAAATTTATAATACTATTGTAACAGCTCATGCTTTTATTATAATTTTTTTCATAGTTATACCAATTATAATTGGAGGATTTGGAAATTGATTAATTCCTTTAATATTAGGAGCCCCAGATATAGCTTTTCCTCGAATAAATAATATAAGATTTTGATTACTACCCCCTTCATTAACTTTATTAATTTCCAGAAGAATTGTAGAAAATGGAGCAGGAACAGGATGAACAGTTTATCCCCCTTTATCATCTAATATCGCTCATAGAGGTAGTTCAGTTGATTTAGCTATTTTTTCTTTACATTTAGCAGGAATTTCATCAATTTTAGGAGCTATTAATTTCATTACAACTATTATTAATATACGAATTAACCATATATCATTTGATCAAATACCCCTCTTTGTATGAGCAGTAGGAATTACTGCTTTACTTTTATTATTATCTTTACCTGTATTAGCTGGTGCTATTACTATATTATTAACAGATCGAAATCTTAATACTTCATTTTTTGATCCTGCAGGAGGTGGAGATCCTATTTTATATCAACATTTA

LOWAM007_Kyrgyzstan_TianShan24 ACACTATATTTTATTTTTGGTATTTGAGCAGGTATAGTAGGAACCTCTTTAAGATTATTAATTCGTACTGAATTAGGTAATCCTGGATCTTTAATTGGAGATGATCAAATTTATAATACTATTGTAACAGCTCATGCTTTTATTATAATTTTTTTTATAGTTATACCAATTATAATTGGAGGATTTGGAAATTGATTAATTCCTTTAATATTAGGGGCCCCAGATATAGCTTTTCCTCGAATAAATAATATAAGATTTTGATTATTACCCCCTTCATTAACTTTATTAATTTCTAGAAGAATTGTAGAAAATGGAGCAGGAACAGGATGAACAGTTTATCCCCCTTTATCATCTAATATCGCTCATAGAGGTAGTTCAGTTGATTTAGCTATTTTTTCTTTACATTTAGCAGGAATTTCATCAATCTTAGGAGCTATTAATTTTATTACAACTATTATTAATATACGAATTAATCATATATCATTTGATCAAATACCTCTCTTTGTATGAGCAGTAGGAATTACTGCTTTACTTTTATTACTATCTTTACCTGTATTAGCTGGTGCTATTACTATATTATTAACAGATCGAAATCTTAATACTTCATTTTTTGATCCTGCAGGAGGTGGAGATCCTATTTTATATCAACATTTA

LOWAM009_Kyrgyzstan_TianShan_6 ACACTATATTTTATTTTTGGTATTTGAGCAGGTATAGTAGGAACCTCTTTAAGATTATTAATTCGTACTGAATTAGGTAATCCTGGATCTTTGATTGGAGATGATCAAATTTATAATACTATTGTAACAGCTCATGCTTTTATTATAATTTTTTTTATAGTTATACCAATTATAATTGGAGGATTTGGAAATTGATTAATTCCTTTAATATTAGGGGCCCCAGATATAGCTTTTCCTCGAATAAATAATATAAGATTTTGATTATTACCCCCTTCATTAACTTTATTAATTTCTAGAAGAATTGTAGAAAATGGAGCAGGAACAGGATGAACAGTTTATCCCCCTTTATCATCTAATATCGCTCATAGAGGTAGTTCAGTTGATTTAGCTATTTTTTCTTTACATTTAGCAGGAATTTCATCAATCTTAGGAGCTATTAATTTTATTACAACTATTATTAATATACGAATTAATCATATATCATTTGATCAAATACCTCTCTTTGTATGAGCAGTAGGAATTACTGCTTTACTTTTATTACTATCTTTACCTGTATTAGCTGGTGCTATTACTATATTATTAACAGATCGAAATCTTAATACTTCATTTTTTGATCCTGCAGGAGGTGGAGATCCTATTTTATATCAACATTTA

LOWAM013_Turkey_Georgia_3 ACACTATATTTTATTTTTGGTATTTGAGCAGGTATAGTAGGAACCTCTTTAAGATTATTAATTCGTACTGAATTAGGTAATCCTGGATCTTTAATTGGAGATGATCAAATTTATAATACTATTGTAACAGCTCATGCTTTTATTATAATTTTTTTTATAGTTATACCAATTATAATTGGAGGATTTGGAAATTGATTAATTCCTTTAATATTAGGAGCCCCAGATATAGCTTTTCCTCGAATAAATAATATAAGATTTTGATTACTGCCCCCCTCATTAACTTTATTAATTTCTAGAAGAATTGTAGAAAATGGAGCAGGAACAGGATGAACAGTTTATCCCCCTTTATCATCTAATATCGCTCATAGAGGTAGTTCAGTTGATTTAGCTATTTTTTCTTTACATTTAGCAGGAATTTCATCAATCTTAGGAGCTATTAATTTTATTACAACTATTATTAATATACGAATTAACCATATATCATTTGATCAAATACCTCTCTTTGTATGAGCAGTAGGAATTACTGCTTTACTTTTATTATTATCTTTACCTGTATTAGCTGGTGCTATTACTATATTATTAACAGATCGAAATCTTAATACTTCATTTTTTGATCCTGCAGGAGGTGGAGATCCTATTTTATATCAACATTTA

LOWAM014_Turkey_Ovitdagi_1 ACACTATATTTTATTTTTGGTATTTGAGCAGGTATAGTAGGAACCTCTTTAAGATTATTAATTCGTACTGAATTAGGTAATCCTGGATCTTTAATTGGAGATGATCAAATTTATAATACTATTGTAACAGCTCATGCTTTTATTATAATTTTTTTTATAGTTATACCAATTATAATTGGAGGATTTGGAAATTGATTAATTCCTTTAATATTAGGAGCCCCAGATATAGCTTTTCCTCGAATAAATAATATAAGATTTTGATTACTGCCCCCCTCATTAACTTTATTAATTTCCAGAAGAATTGTAGAAAATGGAGCAGGAACAGGATGAACAGTTTATCCCCCTTTATCATCTAATATCGCTCATAGAGGTAGTTCAGTTGATTTAGCTATTTTTTCTTTACATTTAGCAGGAATTTCATCAATCTTAGGAGCTATTAATTTTATTACAACTATTATTAATATACGAATTAACCATATATCATTTGATCAAATACCTCTCTTTGTATGAGCAGTAGGAATTACTGCTTTACTTTTATTATTATCTTTACCTGTATTAGCTGGTGCTATTACTATATTATTAACAGATCGAAATCTTAATACTTCATTTTTTGATCCTGCAGGAGGTGGAGATCCTATTTTATATCAACATTTA

LOWAM015_Don_Borisovka_Saratov ACACTATATTTTATTTTTGGTATTTGAGCAGGTATAGTAGGAACCTCTTTAAGATTATTAATTCGTACTGAATTAGGTAATCCTGGATCTTTAATTGGAGATGATCAAATTTATAATACTATTGTAACAGCTCATGCTTTTATTATAATTTTTTTTATAGTTATACCAATTATAATTGGAGGATTTGGAAATTGATTAATTCCTTTAATATTAGGAGCCCCAGATATAGCTTTTCCTCGAATAAATAATATAAGATTTTGATTACTACCCCCCTCATTAACTTTATTAATTTCTAGAAGAATTGTAGAAAATGGAGCAGGAACAGGATGAACAGTTTATCCCCCTTTATCATCTAATATCGCTCATAGAGGTAGTTCAGTTGATTTAGCTATTTTTTCTTTACATTTAGCAGGAATTTCATCAATCTTAGGAGCTATTAATTTTATTACAACTATTATTAATATACGAATTAACCATATATCATTTGATCAAATACCTCTCTTTGTATGAGCAGTAGGAATTACTGCTTTACTTTTATTATTATCTTTACCTGTATTAGCTGGTGCTATTACTATATTATTAACAGATCGAAATCTTAATACTTCATTTTTTGATCCTGCAGGAGGTGGGGATCCTATTTTATATCAACATTTA

LOWAM018_Kyrgyzstan_Karamyk ACACTATATTTTATTTTTGGTATTTGAGCAGGTATAGTAGGAACCTCTTTAAGATTATTAATTCGTACTGAATTAGGTAATCCTGGATCTTTAATTGGAGATGATCAAATTTATAATACTATTGTAACAGCTCATGCTTTTATTATAATTTTTTTTATAGTTATACCAATTATAATTGGAGGATTTGGAAATTGATTAATTCCTTTAATATTAGGAGCCCCAGATATAGCTTTTCCTCGAATAAATAATATAAGATTTTGATTACTACCCCCTTCATTAACTTTATTAATTTCTAGAAGAATTGTAGAAAATGGAGCAGGAACAGGATGAACAGTTTATCCCCCTTTATCATCTAATATCGCTCATAGAGGTAGTTCAGTTGATTTAGCTATTTTTTCTTTACATTTAGCAGGAATTTCATCAATTTTAGGAGCTATTAATTTCATTACAACTATTATTAATATACGAATTAACCATATATCATTTGATCAAATACCCCTCTTTGTATGAGCAGTAGGAATTACTGCTTTACTTTTATTATTATCTTTACCTGTATTAGCTGGTGCTATTACTATATTATTAACAGATCGAAATCTTAATACTTCATTTTTTGATCCAGCAGGAGGTGGAGATCCTATTTTATATCAACATTTA

LOWAM019_Kyrgyzstan_Karamyk ACACTATATTTTATTTTTGGTATTTGAGCAGGTATAGTAGGAACCTCTTTAAGATTATTAATTCGTACTGAATTAGGTAATCCTGGATCTTTAATTGGAGATGATCAAATTTATAATACTATTGTAACAGCTCATGCTTTTATTATAATTTTTTTCATAGTTATACCAATTATAATTGGAGGATTTGGAAATTGATTAATTCCTTTAATATTAGGAGCCCCAGATATAGCTTTTCCTCGAATAAATAATATAAGATTTTGATTACTACCCCCTTCATTAACTTTATTAATTTCTAGAAGAATTGTAGAAAATGGAGCAGGAACAGGATGAACA?TTTATCCCCCTTTATCATCTAATATCGCTCATAGAGGTAGTTCAGTTGATTTAGCTATTTTTTCTTTACATTTAGCAGGAATTTCATCAATTTTAGGGGCTATTAATTTCATTACAACTATTATTAATATACGAATTAACCATATATCATTTGATCAAATACCCCTCTTTGTATGAGCAGTAGGAATTACTGCTTTACTTTTATTATTATCTTTACCTGTATTAGCTGGTGCTATTACTATATTATTAACAGATCGAAATCTTAATACTTCATTTTTTGATCCTGCAGGAGGTGGAGATCCTATTTTATATCAACATTTA

LOWAM021_Russia_Saratov ACACTATATTTTATTTTTGGTATTTGAGCAGGTATAGTAGGAACCTCTTTAAGATTATTAATTCGTACTGAATTAGGTAATCCTGGATCTTTAATTGGAGATGATCAAATTTATAATACTATTGTAACAGCTCATGCTTTTATTATAATTTTTTTTATAGTTATACCAATTATAATTGGAGGATTTGGAAATTGATTAATTCCTTTAATATTAGGAGCCCCAGATATAGCTTTTCCTCGAATAAATAATATAAGATTTTGATTACTACCCCCCTCATTAACTTTATTAATTTCTAGAAGAATTGTAGAAAATGGAGCAGGAACAGGATGAACAGTTTATCCCCCTTTATCATCTAATATCGCTCATAGAGGTAGTTCAGTTGATTTAGCTATTTTTTCTTTACATTTAGCAGGAATTTCATCAATCTTAGGAGCTATTAATTTTATTACAACTATTATTAATATACGAATTAACCATATATCATTTGATCAAATACCTCTCTTTGTATGAGCAGTAGGAATTACTGCTTTACTTTTATTATTATCTTTACCTGTATTAGCTGGTGCTATTACTATATTATTAACAGATCGAAATCTTAATAATTCATTTTTTGATCCTGCAGGAGGTGGGGATCCTATTTTATATCAACATTTA

LOWAM023_Saratov_Luga_Vologda_4 ACACTATATTTTATTTTTGGTATTTGAGCAGGTATAGTAGGAACCTCTTTAAGATTATTAATTCGTACTGAATTAGGTAATCCTGGATCTTTAATTGGAGATGATCAAATTTATAATACTATTGTAACAGCTCATGCTTTTATTATAATTTTTTTTATAGTTATACCAATTATAATTGGAGGATTTGGAAATTGATTAATTCCTTTAATATTAGGAGCCCCAGATATAGCTTTTCCTCGAATAAATAATATAAGATTTTGATTACTACCCCCCTCATTAACTTTATTAATTTCTAGAAGAATTGTAGAAAATGGAGCAGGAACAGGATGAACAGTTTATCCCCCTTTATCATCTAATATCGCTCATAGAGGTAGTTCAGTTGATTTAGCTATTTTTTCTTTACATTTAGCAGGAATTTCATCAATCTTAGGAGCTATTAATTTTATTACAACTATTATTAATATACGAATTAACCATATATCATTTGATCAAATACCTCTCTTTGTATGAGCAGTAGGAATTACTGCTTTACTTTTATTATTATCTTTACCTGTATTAGCTGGTGCTATTACTATATTATTAACAGATCGAAATCTTAATACTTCATTTTTTGATCCTGCAGGAGGTGGAGATCCTATTTTATATCAACATTTA

LOWAM027_Kazakhstan_Karatau_2 ACACTATATTTTATTTTTGGTATTTGAGCAGGTATAGTAGGAACCTCTTTAAGATTATTAATTCGTACTGAATTAGGTAATCCTGGATCTTTAATTGGAGATGATCAAATTTATAATACTATTGTAACAGCTCATGCTTTTATTATAATTTTTTTTATAGTTATACCAATTATAATTGGAGGATTTGGAAATTGATTAATTCCTTTAATATTAGGGGCCCCAGATATAGCTTTTCCTCGAATAAATAATATAAGATTTTGATTATTACCCCCTTCATTAACTTTATTAATTTCTAGAAGAATTGTAGAAAATGGAGCAGGAACAGGATGAACAGTTTATCCCCCTTTATCATCTAATATCGCTCATAGAGGTAGTTCAGTTGATTTAGCTATTTTTTCTTTACATTTAGCAGGAATTTCATCAATCTTAGGAGCTATTAATTTTATTACAACTATTATTAATATACGAATTAATCATATATCATTTGATCAAATACCTCTCTTTGTATGAGCAGTAGGAATTACTGCTTTACTTTTATTACTATCCTTACCTGTATTAGCTGGTGCTATTACTATATTATTAACAGATCGAAATCTTAATACTTCATTTTTTGATCCTGCAGGAGGTGGAGATCCTATTTTATATCAACATTTA

LOWAM037_Russia_Pskovskaya ---------TTTATTTTTGGTATTTGAGCAGGTATAGTAGGAACCTCTTTAAGATTATTAATTCGTACTGAATTAGGTAATCCTGGATCTTTAATTGGAGATGATCAAATTTATAATACTATTGTAACAGCTCATGCTTTTATTATAATTTTTTTTATAGTTATACCAATTATAATTGGAGGATTTGGAAATTGATTAATTCCTTTAATATTAGGAGCCCCAGATATAGCTTTTCCTCGAATAAATAATATAAGATTTTGATTACTACCCCCCTCATTAACTTTATTAATTTCTAGAAGAATTGTAGAAAATGGAGCAGGAACAGGATGAACAGTTTATCCCCCTTTATCATCTAATATCGCTCATAGAGGTAGTTCAGTTGATTTAGCTATTTTTTCTTTACATTTAGCAGGAATTTCATCAATCTTAGGAGCTATTAATTTTATTACAACTATTATTAATATACGAATTAACCATATATCATTTGATCAAATACCTCTCTTTGTATGAGCAGTAGGAATTACTGCTTTACTTTTATTATTATCTTTACCTGTATTAGCTGGTGCTATTACTATATTATTAACAGATCGAAATCTTAATACTTCATTTTTTGATCCTGCAGGAGGTGGAGATCCTATTTTATATCAACATTTA

LOWAM038_Kyrgyzstan_Tjuz_Ashu_3 ACACTATATTTTATTTTTGGTATTTGAGCAGGTATAGTAGGAACCTCTTTAAGATTATTAATTCGTACTGAATTAGGTAATCCTGGATCTTTAATTGGAGATGATCAAATTTATAATACTATTGTAACAGCTCATGCTTTTATTATAATTTTTTTTATAGTTATACCAATTATAATTGGAGGATTTGGAAATTGATTAATTCCTTTAATATTAGGGGCCCCAGATATAGCTTTTCCTCGAATAAATAATATAAGATTTTGATTATTACCCCCTTCATTAACTTTATTAATTTCTAGAAGAATTGTAGAAAATGGAGCAGGAACAGGATGAACAATTTATCCCCCTTTATCATCTAATATCGCTCATAGAGGTAGTTCAGTTGATTTAGCTATTTTTTCTTTACATTTAGCGGGAATTTCATCAATCTTAGGAGCTATTAATTTTATTACAACTATTATTAATATACGAATTAATCATATATCATTTGATCAAATACCTCTCTTTGTATGAGCAGTAGGAATTACTGCTTTACTTTTATTACTATCTTTACCTGTATTAGCTGGTGCTATTACTATATTATTAACAGATCGAAATCTTAATACTTCATTTTTTGATCCTGCAGGAGGTGGAGATCCTATTTTATATCAACATTTA

LOWAM039_Kyrgyzstan_23 ACACTATATTTTATTTTTGGTATTTGAGCAGGTATAGTAGGAACCTCTTTAAGATTATTAATTCGTACTGAATTAGGTAATCCTGGATCTTTAATTGGAGATGATCAAATTTATAATACTATTGTAACAGCTCATGCTTTTATTATAATTTTTTTTATAGTTATACCAATTATAATTGGAGGATTTGGAAATTGATTAATTCCTTTAATATTAGGGGCCCCAGATATAGCTTTTCCTCGAATAAATAATATAAGATTTTGATTATTACCCCCTTCATTAACTTTATTAATTTCTAGAAGAATTGTAGAAAATGGAGCAGGAACAGGATGAACAGTTTATCCCCCTTTATCATCTAATATCGCTCATAGAGGTAGTTCAGTTGATTTAGCTATTTTTTCTTTACATTTAGCGGGAATTTCATCAATCTTAGGAGCTATTAATTTTATTACAACTATTATTAATATACGAATTAATCATATATCATTTGATCAAATACCTCTCTTTGTATGAGCAGTAGGAATTACTGCTTTACTTTTATTACTATCTTTACCTGTATTAGCTGGTGCTATTACTATATTATTAACAGATCGAAATCTTAATACTTCATTTTTTGATCCTGCAGGAGGTGGAGATCCTATTTTATATCAACATTTA

LOWAM044_Russia_Borisovra_3 ACACTATATTTTATTTTTGGTATTTGAGCAGGTATAGTAGGAACCTCTTTAAGATTATTAATTCGTACTGAATTAGGTAATCCTGGATCTTTAATTGGAGATGATCAAATTTATAATACTATTGTAACAGCTCATGCTTTTATTATAATTTTTTTTATAGTTATACCAATTATAATTGGAGGATTTGGAAATTGATTAATTCCCTTAATATTAGGAGCCCCAGATATAGCTTTTCCTCGAATAAATAATATAAGATTTTGATTACTACCCCCCTCATTAACTTTATTAATTTCTAGAAGAATTGTAGAAAATGGAGCAGGAACAGGATGAACAGTTTATCCCCCTTTATCATCTAATATCGCTCATAGAGGTAGTTCAGTTGATTTAGCTATTTTTTCTTTACATTTAGCAGGAATTTCATCAATCTTAGGAGCTATTAATTTTATTACAACTATTATTAATATACGAATTAACCATATATCATTTGATCAAATACCTCTCTTTGTATGAGCAGTAGGAATTACTGCTTTACTTTTATTATTATCTTTACCTGTATTAGCTGGTGCTATTACTATATTATTAACAGATCGAAATCTTAATACTTCATTTTTTGATCCTGCAGGAGGTGGAGATCCTATTTTATATCAACATTTA

LOWAM045_Tajikistan_Shakhristan_3 ACACTATATTTTATTTTTGGTATTTGAGCAGGTATAGTAGGAACCTCTTTAAGATTATTAATTCGTACTGAATTAGGTAATCCTGGATCTTTAATTGGAGATGATCAAATTTATAATACTATTGTAACAGCTCATGCTTTTATTATAATTTTTTTCATAGTTATACCAATTATAATTGGAGGATTTGGAAATTGATTAATTCCTTTAATATTAGGAGCCCCAGATATAGCTTTTCCTCGAATAAATAATATAAGATTTTGATTACTACCCCCTTCATTAACTTTATTAATTTCCAGAAGAATTGTAGAAAATGGAGCAGGAACAGGATGAACAGTTTATCCCCCTTTATCATCTAATATTGCTCATAGAGGTAGTTCAGTTGATTTAGCTATTTTTTCTTTACATTTAGCAGGAATTTCATCAATTTTAGGAGCTATTAATTTCATTACAACTATTATTAATATACGAATTAACCATATATCATTTGATCAAATACCCCTCTTTGTATGAGCAGTAGGAATTACTGCTTTACTTTTATTATTATCTTTACCTGTATTAGCTGGTGCTATTACTATATTATTAACAGATCGAAATCTTAATACTTCATTTTTTGATCCTGCAGGAGGTGGAGATCCTATTTTATATCAACATTTA

LOWAM067_Kazakhstan_Kaindy_1 ACACTATATTTTATTTTTGGTATTTGAGCAGGTATAGTAGGAACCTCTTTAAGATTATTAATTCGTACTGAATTAGGTAATCCTGGATCTTTAATTGGAGATGATCAAATTTATAATACTATTGTAACAGCTCATGCTTTTATTATAATTTTTTTTATAGTTATACCAATTATAATTGGAGGATTTGGAAATTGATTAATTCCTTTAATATTAGGGGCCCCAGATATAGCTTTTCCTCGAATAAATAATATAAGATTTTGATTATTACCCCCTTCATTAACTTTATTAATTTCTAGAATAATTGTAGAAAATGGAGCAGGAACAGGATGAACAGTTTATCCCCCTTTATCATCTAATATCGCTCATAGAGGTAGTTCAGTTGATTTAGCTATTTTTTCTTTACATTTAGCGGGAATTTCATCAATCTTAGGAGCTATTAATTTTATTACAACTATTATTAATATACGAATTAATCATATATCATTTGATCAAATACCTCTCTTTGTATGAGCAGTAGGAATTACTGCTTTACTTTTATTACTATCTTTACCTGTATTAGCTGGTGCTATTACTATATTATTAACAGATCGAAATCTTAATACTTCATTTTTTGATCCTGCAGGAGGTGGAGATCCTATTTTATATCAACATTTA

LOWAM069_Russia_Teberda_2 ---------TTTATTTTTGGTATTTGAGCAGGTATAGTAGGAACCTCTTTAAGATTATTAATTCGTACTGAATTAGGTAATCCTGGATCTTTAATTGGAGATGATCAAATTTATAATACTATTGTAACAGCTCATGCTTTTATTATAATTTTTTTTATAGTTATACCAATTATAATTGGAGGATTTGGAAATTGATTAATTCCTTTAATATTAGGAGCCCCAGATATAGCTTTTCCTCGAATAAATAATATAAGATTTTGATTACTGCCCCCCTCATTAACTTTATTAATTTCTAGAAGAATTGTAGAAAATGGAGCAGGAACAGGATGAACAGTTTATCCCCCTTTATCATCTAATATCGCTCATAGAGGTAGTTCAGTTGATTTAGCTATTTTTTCTTTACATTTAGCAGGAATTTCATCAATCTTAGGAGCTATTAATTTTATTACAACTATTATTAATATACGAATTAATCATATATCATTTGATCAAATACCTCTCTTTGTATGAGCAGTAGGAATTAC?GCTTTACTTTTATTATTATCTTTACCTGTATTAGCTGG?GCTATTACTATATTATTAACAGATCGAAATCT?AATACTTCATTTTTTGATCCTGCAGGAGGAGGAGATCCTATTTTATATCAACATTTA

LOWAM073_Kyrgyzstan_Takhtalyk1 ACACTATATTTTATTTTTGGTATTTGAGCAGGTATAGTAGGAACCTCTTTAAGATTATTAATTCGTACTGAATTAGGTAATCCTGGATCTTTAATTGGAGATGATCAAATTTATAATACTATTGTAACAGCTCATGCTTTTATTATAATTTTTTTTATAGTTATACCAATTATAATTGGAGGATTTGGAAATTGATTAATTCCTTTAATATTAGGGGCCCCAGATATAGCTTTTCCTCGAATAAATAATATAAGATTTTGATTATTACCCCCTTCATTAACTTTATTAATTTCTAGAAGAATTGTAGAAAATGGAGCAGGAACAGGATGAACAGTTTATCCCCCTTTATCATCTAATATCGCTCATAGAGGTAGTTCAGTTGATTTAGCTATTTTTTCTTTACATTTAGCGGGGATTTCATCAATCTTAGGAGCTATTAATTTTATTACAACTATTATTAATATACGAATTAATCATATATCATTTGATCAAATACCTCTCTTTGTATGAGCAGTAGGAATTACTGCTTTACTTTTATTATTATCTTTACCTGTATTAGCTGGTGCTATTACTATATTATTAACAGATCGAAATCTTAATACTTCATTTTTTGATCCTGCAGGAGGTGGAGATCCTATTTTATATCAACATTTA

LOWAM074_Kyrgyzstan_Naryntoo ACACTATATTTTATTTTTGGTATTTGAGCAGGTATAGTAGGAACCTCTTTAAGATTATTAATTCGTACTGAATTAGGTAATCCTGGATCTTTAATTGGAGATGATCAAATTTATAATACTATTGTAACAGCTCATGCTTTTATTATAATTTTTTTTATAGTTATACCAATTATAATTGGAGGATTTGGAAATTGATTAATTCCTTTAATATTAGGGGCCCCAGATATAGCTTTTCCTCGAATAAATAATATAAGATTTTGATTATTACCCCCTTCATTAACTTTATTAATTTCTAGAAGAATTGTAGAAAATGGAGCAGGAACAGGATGAACAGTTTATCCCCCTTTATCATCTAATATCGCTCATAGAGGTAGTTCAGTTGATTTAGCTATTTTTTCTTTACATTTAGCGGGAATTTCATCAATCTTAGGAGCTATTAATTTTATTACAACTATTATTAATATACGAATTAATCATATATCATTTGATCAAATACCTCTCTTTGTATGAGCAGTAGGAATTACTGCTTTACTTTTATTACTATCTTTACCTGTATTAGCTGGTGCTATTACTATATTATTAACAGATCGAAATCTTAATACTTCATTTTTTGATCCTGCAGGAGGTGGAGATCCTATTTTATATCAACATTTA

LOWAM086_Turkmenistan_3 ACATTATATTTTATTTTTGGTATTTGAGCAGGTATAGTAGGAACTTCCTTAAGATTATTAATTCGTACTGAATTAGGTAATCCTGGATCTTTAATTGGAGATGATCAAATTTATAATACTATTGTAACAGCTCATGCTTTTATTATAATTTTTTTTATAGTTATACCAATTATAATTGGAGGATTTGGAAATTGATTAATTCCTTTAATATTAGGAGCCCCAGATATAGCTTTCCCCCGAATAAATAATATAAGATTTTGATTATTACCCCCCTCATTAACTTTATTAATTTCTAGAAGAATTGTAGAAAATGGAGCAGGAACTGGATGAACAGTTTATCCCCCTTTATCATCTAATATTGCCCATAGAGGTAGTTCAGTTGATTTAGCTATCTTTTCTTTACATTTAGCAGGAATTTCATCAATTTTAGGAGCTATTAATTTTATTACAACTATTATTAATATACGAATTAATCATATATCATTTGATCAAATACCTCTTTTTGTATGAGCAGTAGGAATTACTGCTTTACTTTTATTACTATCTTTACCTGTATTAGCTGGTGCTATTACTATATTATTAACAGATCGAAATCTTAATACCTCATTTTTTGATCCAGCAGGAGGTGGAGATCCTATTTTATATCAACATTTA

LOWAM087_Uzbekistan_Sarchashma ACACTATATTTTATTTTTGGTATTTGAGCAGGTATAGTAGGAACCTCTTTAAGATTATTAATTCGTACTGAATTAGGTAATCCTGGATCTTTAATTGGAGATGATCAAATTTATAATACTATTGTAACAGCTCATGCTTTTATTATAATTTTTTTCATAGTTATACCAATTATAATTGGAGGATTTGGAAATTGATTAATTCCTTTAATATTAGGAGCCCCAGATATAGCTTTTCCTCGAATAAATAATATAAGATTTTGATTACTACCCCCTTCATTAACTTTATTAATTTCCAGAAGAATTGTAGAAAATGGAGCAGGAACAGGATGAACAGTTTATCCCCCTTTATCATCTAATATCGCTCATAGAGGTAGTTCAGTTGATTTAGCTATTTTTTCTTTACATTTAGCAGGAATTTCATCAATTTTAGGAGCTATTAATTTCATTACAACTATTATTAATATACGAATTAACCATATATCATTTGATCAAATACCCCTCTTTGTATGAGCAGTAGGAATTACTGCTTTACTTTTATTATTATCTTTACCTGTATTAGCTGGTGCTATTACTATATTATTAACAGATCGAAATCTTAATACTTCATTTTTTGATCCTGCAGGAGGTGGAGATCCTATTTA??ATCAACATTTA

LOWAM095_Kyrgyzstan_Sosnovka ACACTATATTTTATTTTTGGTATTTGAGCAGGTATAGTAGGAACCTCTTTAAGATTATTAATTCGTACTGAATTAGGTAATCCTGGATCTTTAATTGGAGATGATCAAATTTATAATACTATTGTAACAGCTCATGCTTTTATTATAATTTTTTTTATAGTTATACCAATTATAATTGGAGGATTTGGAAATTGATTAATTCCTTTAATATTAGGGGCTCCAGATATAGCTTTTCCTCGAATAAATAATATAAGATTTTGATTATTACCCCCTTCATTAACTTTATTAATTTCTAGAAGAATTGTAGAAAATGGAGCAGGAACAGGATGAACAGTTTATCCCCCTTTATCATCTAATATCGCTCATAGAGGTAGTTCAGTTGATTTAGCTATTTTTTCTTTACATTTAGCGGGAATTTCATCAATCTTAGGAGCTATTAATTTTATTACAACTATTATTAATATACGAATTAATCATATATCATTTGATCAAATACCTCTCTTTGTATGAGCAGTAGGAATTACTGCTTTACTTTTATTACTATCTTTACCTGTATTAGCTGGTGCTATTACTATATTATTAACAGATCGAAATCTTAATACTTCATTTTTTGATCCTGCAGGAGGTGGAGATCCTATTTTATATCAACATTTA

LOWAM096_Gissar_5 ACACTATATTTTATTTTTGGTATTTGAGCAGGTATAGTAGGAACCTCTTTAAGATTATTAATTCGTACTGAATTAGGTAATCCTGGATCTTTAATTGGAGATGATCAAATTTATAATACTATTGTAACAGCTCATGCTTTTATTATAATTTTTTTCATAGTTATACCAATTATAATTGGAGGATTTGGAAATTGATTAATTCCTTTAATATTAGGAGCCCCAGATATAGCTTTTCCTCGAATAAATAATATAAGATTTTGATTACTACCCCCTTCATTAACTTTATTAATTTCCAGAAGAATTGTAGAAAATGGAGCAGGAACAGGATGAACAGTTTATCCCCCTTTATCGTCTAATATCGCTCATAGAGGTAGTTCAGTTGATTTAGCTATTTTTTCTTTACATTTAGCAGGAATTTCATCAATTTTAGGAGCTATTAATTTCATTACAACTATTATTAATATACGAATTAACCATATATCATTTGATCAAATACCCCTCTTTGTATGAGCAGTAGGAATTACTGCTTTACTTTTATTATTATCTTTACCTGTATTAGCTGGTGCTATTACTATATTATTAACAGATCGAAATCTTAATACTTCATTTTTTGATCCTGCAGGAGGTGGAGATCCTATTTTATATCAACATTTA

LOWAM098_Tajikistan_Khondiza1 ACACTATATTTTATTTTTGGTATTTGAGCAGGTATAATAGGAACCTCTTTAAGATTATTAATTCGTACTGAATTAGGTAATCCTGGATCTTTAATTGGAGATGATCAAATTTATAATACTATTGTAACAGCTCATGCTTTTATTATAATTTTTTTCATAGTTATACCAATTATAATTGGAGGATTTGGAAATTGATTAATTCCTTTAATATTAGGAGCCCCAGATATAGCTTTTCCTCGAATAAATAATATAAGATTTTGATTACTACCCCCTTCATTAACTTTATTAATTTCCAGAAGAATTGTAGAAAATGGAGCAGGAACAGGATGAACAGTTTATCCCCCTTTATCGTCTAATATCGCTCATAGAGGTAGTTCAGTTGATTTAGCTATTTTTTCTTTACATTTAGCAGGAATTTCATCAATTTTAGGAGCTATTAATTTCATTACAACTATTATTAATATACGAATTAACCATATATCATTTGATCAAATACCCCTCTTTGTATGAGCAGTAGGAATTACTGCTTTACTTTTATTATTATCTTTACCTGTATTAGCTGGTGCTATTACTATATTATTAACAGATCGAAATCTTAATACTTCATTTTTTGATCCTGCAGGAGGTGGAGATCCTATTTTATATCAACATTTA

LOWAM099_Uzbekistan_Kamchik_2 ACACTATATTTTATTTTTGGTATTTGAGCAGGTATAGTAGGAACCTCTTTAAGATTATTAATTCGTACTGAATTAGGTAATCCTGGATCTTTAATTGGAGATGATCAAATTTATAATACTATTGTAACAGCTCATGCTTTTATTATAATTTTTTTTATAGTTATACCAATTATAATTGGAGGATTTGGAAATTGATTAATTCCTTTAATATTAGGGGCCCCAGATATAGCTTTTCCTCGAATAAATAATATAAGATTTTGATTATTACCCCCTTCATTAACTTTATTAATTTCTAGAAGAATTGTAGAAAATGGAGCAGGAACAGGATGAACAGTTTATCCCCCTTTATCATCTAATATCGCTCATAGAGGTAGTTCAGTTGATTTAGCTATTTTTTCTTTACATTTAGCAGGAATTTCATCAATTTTAGGAGCTATTAATTTTATTACAACTATTATTAATATACGAATTAATCATATATCATTTGATCAAATACCTCTCTTTGTATGAGCAGTAGGAATTACTGCTTTACTTTTATTACTATCTTTACCTGTATTAGCTGGTGCTATTACTATATTATTAACAGATCGAAATCTTAATACTTCATTTTTTGATCCTGCAGGAGGTGGAGATCCTATTTTATATCAACATTTA

LOWAM100_Kyrgyzstan_Konduk ACACTATATTTTATTTTTGGTATTTGAGCAGGTATAGTAGGAACCTCTTTAAGATTATTAATTCGTACTGAATTAGGTAATCCTGGATCTTTAATTGGAGATGATCAAATTTATAATACTATTGTAACAGCTCATGCTTTTATTATAATTTTTTTTATAGTTATACCAATTATAATTGGAGGATTTGGAAATTGATTAATTCCTTTAATATTAGGGGCCCCAGATATAGCTTTTCCTCGAATAAATAATATAAGATTTTGATTATTACCCCCTTCATTAACTTTATTAATTTCTAGAAGAATTGTAGAAAATGGAGCAGGAACAGGATGAACAGTTTATCCCCCTTTATCATCTAATATCGCTCATAGAGGTAGTTCAGTTGATTTAGCTATTTTTTCTTTACATTTAGCGGGAATTTCATCAATCTTAGGAGCTATTAATTTTATTACAACTATTATTAATATACGAATTAATCATATATCATTTGATCAAATACCTCTCTTTGTATGAGCAGTAGGAATTACTGCTTTACTTTTATTACTATCTTTACCTGTATTAGCTGGTGCTATTACTATATTATTAACAGATCGAAATCTTAATACTTCATTTTTTGATCCTGCAGGAGGTGGAGATCCTATTTTATATCAACATTTA

LOWAM115_Azerbaijan_Nyus_Nyus ACACTATATTTTATTTTCGGTATTTGAGCAGGTATAGTAGGAACCTCTTTAAGATTATTAATTCGTACTGAATTAGGTAATCCCGGATCTTTAATTGGAGATGATCAAATTTATAACACTATTGTAACAGCTCATGCTTTTATTATAATTTTTTTTATAGTTATACCAATTATAATTGGAGGATTTGGAAATTGATTAATTCCTTTAATATTAGGAGCTCCAGATATAGCTTTTCCTCGAATAAATAATATAAGATTTTGATTACTCCCCCCCTCATTAACTTTATTAATTTCTAGAAGAATTGTAGAAAATGGAGCAGGAACAGGATGAACAATTTATCCCCCTTTATCATCTAATATTGCTCATAGAGGTAGTTCAGTTGATTTAGCTATTTTTTCTTTACATTTAGCAGGAATTTCATCAATCTTAGGAGCTATTAATTTTATTACAACTATTATTAACATACGAATTAATCATATATCATTTGATCAAATACCCCTTTTTGTATGAGCAGTAGGAATTACTGCATTACTTTTATTATTATCTTTACCTGTATTAGCTGGTGCTATTACTATATTATTAACAGATCGAAATCTTAATACTTCATTTTTTGATCCTGCAGGAGGTGGAGATCCTATTTTATATCAACACTTA

LOWAM116_Iran_Dizin_2 ACACTATATTTTATTTTCGGTATTTGAGCAGGTATAGTAGGAACCTCTTTAAGATTATTAATTCGTACTGAATTAGGTAATCCTGGATCTTTAATTGGAGATGATCAAATTTATAACACTATTGTAACAGCTCATGCTTTTATTATAATTTTTTTTATAGTTATACCAATTATAATTGGAGGATTTGGAAATTGATTAATTCCTTTAATATTAGGAGCTCCAGATATAGCTTTTCCTCGAATAAATAATATAAGATTTTGATTACTCCCCCCCTCATTAACTTTATTAATTTCTAGAAGAATTGTAGAAAATGGAGCAGGAACAGGATGAACAATTTATCCCCCTTTATCATCTAATATTGCTCATAGAGGTAGTTCAGTTGATTTAGCTATTTTTTCTTTACATTTAGCAGGAATTTCATCAATCTTAGGAGCTATTAATTTTATTACAACTATTATTAACATACGAATTAATCATATATCATTTGATCAAATACCCCTTTTTGTATGAGCAGTAGGAATTACTGCATTACTTTTATTATTATCTTTACCTGTATTAGCTGGTGCTATTACTATATTATTAACAGATCGAAATCTTAATACTTCATTTTTTGATCCTGCAGGAGGTGGAGATCCTATTTTATATCAACACTTA

LOWAM122_Russia_Saratow_1 ACACTATATTTTATTTTTGGTATTTGAGCAGGTATAGTAGGAACCTCTTTAAGATTATTAATTCGTACTGAATTAGGTAATCCTGGATCTTTAATTGGAGATGATCAAATTTATAACACTATTGTAACAGCTCATGCTTTTATTATAATTTTTTTTATAGTTATACCAATTATAATTGGAGGATTTGGAAATTGATTAATTCCTTTAATATTAGGAGCCCCAGATATAGCTTTTCCTCGAATAAATAATATAAGATTTTGATTACTACCCCCCTCATTAACTTTATTAATTTCTAGAAGAATTGTAGAAAATGGAGCAGGAACAGGATGAACAGTTTATCCCCCTTTATCATCTAATATCGCTCATAGAGGTAGTTCAGTTGATTTAGCTATTTTTTCTTTACATTTAGCAGGAATTTCATCAATCTTAGGAGCTATTAATTTTATTACAACTATTATTAATATACGAATTAACCATATATCATTTGATCAAATACCTCTCTTTGTATGAGCAGTAGGAATTACTGCTTTACTTTTATTATTATCTTTACCTGTATTAGCTGGTGCTATTACTATATTATTAACAGATCGAAATCTTAATACTTCATTTTTTGATCCTGCAGGAGGTGGGGATCCTATTTTATATCAACATTTA

LOWAM136_Uzbekistan_Tamshush_1 ACACTATATTTTATTTTTGGTATTTGAGCAGGTATAGTAGGAACCTCTTTAAGATTATTAATTCGTACTGAATTAGGTAATCCTGGATCTTTAATTGGAGATGATCAAATTTATAATACTATTGTAACAGCTCATGCTTTTATTATAATTTTTTTCATAGTTATACCAATTATAATTGGAGGATTTGGAAATTGATTAATTCCTTTAATATTAGGAGCCCCAGATATAGCTTTTCCTCGAATAAATAATATAAGATTTTGATTACTACCCCCTTCATTAACTTTATTAATTTCCAGAAGAATTGTAGAAAATGGAGCAGGAACAGGATGAACAGTTTATCCCCCTTTATCATCTAATATCGCTCATAGAGGTAGTTCAGTTGATTTAGCTATTTTTTCTTTACATTTAGCAGGAATTTCATCAATTTTAGGAGCTATTAATTTCATTACAACTATTATTAATATACGAATTAACCATATATCATTTGATCAAATACCCCTCTTTGTATGAGCAATAGGAATTACTGCTTTACTTTTATTATTATCTTTACCTGTATTAGCTGGTGCTATTACTATATTATTAACAGATCGAAATCTTAATACTTCATTTTTTGATCCTGCAGGAGGTGGAGATCCTATTTTATATCAACATTTA

LOWAM149_Kyrgyzstan_Songkel_1 ACACTATATTTTATTTTTGGTATTTGAGCAGGTATAGTAGGAACCTCTTTAAGATTATTAATTCGTACTGAATTAGGTAATCCTGGATCTTTAATTGGAGATGATCAAATTTATAATACTATTGTAACAGCTCATGCTTTTATTATAATTTTTTTTATAGTTATACCAATTATAATTGGAGGATTTGGAAATTGATTAATTCCTTTAATATTAGGGGCCCCAGATATAGCTTTTCCTCGAATAAATAATATAAGATTTTGATTATTACCCCCCTCATTAACTTTATTAATTTCTAGAAGAATTGTAGAAAATGGAGCAGGAACAGGATGAACAGTTTATCCCCCTTTATCATCTAATATTGCTCATAGAGGTAGTTCAGTTGATTTAGCTATTTTTTCTTTACATTTAGCGGGAATTTCATCAATCTTAGGAGCTATTAATTTTATTACAACTATTATTAATATACGAATTAATCATATATCATTTGATCAAATACCTCTCTTTGTATGAGCAGTAGGAATTACTGCTTTACTTTTATTACTATCTTTACCTGTATTAGCTGGTGCTATTACTATATTATTAACAGATCGAAATCTTAATACTTCATTTTTTGATCCTGCAGGAGGTGGAGATCCTATTTTATATCAACATTTA

LOWAM198_Turkey_Aladaglar_2 ACACTATATTTTATTTTTGGTATTTGAGCAGGTATAGTAGGAACCTCTTTAAGATTATTAATTCGTACTGAATTAGGTAATCCTGGATCTTTAATTAGAGATGATCAAATTTATAATACTATTGTAACAGCTCATGCTTTTATTATAATTTTTTTTATAGTTATACCAATTATAATTGGAGGATTTGGAAATTGATTAATTCCTTTAATATTAGGAGCTCCAGATATAGCTTTTCCTCGAATAAATAATATAAGATTTTGATTACTTCCCCCTTCATTAACTTTATTAATTTCTAGAAGAATTGTAGAAAATGGAGCAGGAACAGGATGAACAGTTTATCCCCCTTTATCATCTAATATTGCTCATAGAGGTAGTTCAGTTGATTTAGCTATTTTTTCTTTACATTTAGCAGGAATTTCATCAATCTTAGGAGCTATTAATTTTATTACAACTATTATTAATATA---------------------------------------------------------------------------------------------------------------------------------------------------------------------------------------------

LOWAM213_Tajikistan_Tandukul_1 ACACTATATTTTATTTTTGGTATTTGAGCAGGTATAGTAGGAACCTCTTTAAGATTATTAATTCGTACTGAATTAGGTAATCCTGGATCTTTAATTGGAGATGATCAAATTTATAATACTATTGTAACAGCTCATGCTTTTATTATAATTTTTTTCATAGTTATACCAATTATAATTGGAGGATTTGGAAATTGATTAATTCCTTTAATATTAGGAGCCCCAGATATAGCTTTTTCTCGAATAAATAATATAAGATTTTGATTACTACCCCCTTCATTAACTTTATTAATTTCTAGAAGAATTGTAGAAAATGGAGCAGGAACAGGATGAACAGTTTATCCCCCTTTATTATCTAATATCGCTCATAGAGGTAGTTCAGTTGATTTAGCTATTTTTTCTTTACATTTAGCAGGAATTTCATCAATTTTAGGAGCTATTAATTTCATTACAACTATTATTAATATACGAATTAACCATATATCATTTGATCAAATACCCCTCTTTGTATGAGCAGTAGGAATTACTGCGTTACTTTTATTATTATCTTTACCTGTATTAGCTGGTGCTATTACTATATTATTAACAGATCGAAATCTTAATACTTCATTTTTTGATCCTGCAGGAGGTGGAGATCCTATTTTATATCAACATTTA

Parnassius_clodius ACATTATATTTTATTTTTGGTATTTGAGCAGGTATAGTAGGAACCTCTTTAAGATTATTAATTCGTACTGAATTAGGTAATCCTGGATCTTTAATTGGAGATGATCAAATTTATAATACTATTGTAACAGCTCATGCTTTTATCATAATTTTTTTCATAGTTATACCAATTATAATTGGAGGATTTGGAAATTGATTAATTCCATTAATATTAGGAGCTCCAGATATAGCTTTTCCTCGAATAAATAATATAAGATTTTGATTATTACCCCCTTCATTAACTTTATTAATTTCTAGAAGAATTGTACAAAATGGAGCAGGAACTGGATGAACAGTTTATCCCCCTTTATCATCTAATATTGCTCATAGAGGAAGATCAGTTGATTTAGCTATTTTTTCTTTACATTTAGCTGGAATTTCATCTATCTTAGGAGCTATTAATTTTATTACAACTATTATTAATATACGAATTAATCATATATCATTTGATCAAATACCCCTTTTTGTATGAGCAGTAGGAATTACCGCTTTACTTCTATTATTATCTTTACCTGTTTTAGCAGGTGCTATTACCATATTATTAACAGATCGAAATCTTAATACTTCATTTTTTGATCCAGCAGGAGGTGGAGATCCTATTTTATATCAACACTTA

Parnassius_eversmanni_2005_LOWA_108 ---------------------ATTTGAGCAGGTATAGTAGGAACCTCTTTAAGATTATTAATTCGTTCTGAATTAGGTAATCCTGGATCTTTAATTGGAGATGATCAAATTTATAATACTATTGTAACAGCTCATGCTTTTATTATAATTTTTTTTATAGTTATACCAATTATAATTGGAGGATTTGGAAATTGATTAATTCCATTAATATTAGGAGCTCCAGATATAGCTTTTCCTCGAATAAATAATATAAGATTTTGATTATTACCCCCCTCATTAACCTTACTAATTTCTAGAAGAATTGTAGAAAATGGAGCAGGAACTGGATGAACGGTTTATCCCCCTTTATCATCTAATATTGCTCATAGAGGAAGATCAGTTGATTTAGCTATCTTTTCTTTACATTTAGCTGGAATTTCATCTATCTTAGGAGCTATTAATTTTATTACAACTATTATTAATATACGAATTAATCATATATCATTTGATCAAATACCCCTTTTTGTATGAGCAGTAGGAATTACTGCTTTACTTTTATTATTATCTTTACCTGTTTTAGCAGGTGCTATTACCATATTATTAACAGATCGAAATCTTAATACTTCATTTTTTGACCCAGCAGGAGGTGGAGATCCTATTTTATATCAACATTTA

Parnassius_eversmanni_2005_LOWA_107 ---------------------ATTTGAGCAGGTATAGTAGGAACCTCTTTAAGATTATTAATTCGTTCTGAATTAGGTAATCCTGGATCTTTAATTGGAGATGATCAAATTTATAATACTATTGTAACAGCTCATGCTTTTATTATAATTTTTTTTATAGTTATACCAATTATAATTGGAGGATTTGGAAATTGATTAATTCCATTAATATTAGGAGCTCCAGATATAGCTTTTCCTCGAATAAATAATATAAGATTTTGATTATTACCCCCCTCATTAACCTTACTAATTTCTAGAAGAATTGTAGAAAATGGAGCAGGAACTGGATGAACGGTTTATCCCCCTTTATCATCTAATATTGCTCATAGAGGAAGATCAGTTGATTTAGCTATCTTTTCTTTACATTTAGCTGGAATTTCATCTATCTTAGGAGCTATTAATTTTATTACAACTATTATTAATATACGAATTAATCATATATCATTTGATCAAATACCCCTTTTTGTATGAGCAGTAGGAATTACTGCTTTACTTTTATTATTATCTTTACCTGTTTTAGCAGGTGCTATTACCATATTATTAACAGATCGAAATCTTAATACTTCATTTTTTGACCCAGCAGGAGGTGGAGATCCTATTTTATATCAACATTTA

Parnassius_stubbendorfii_2005_LOWA_815 ACATTATATTTTATTTTTGGTATTTGAGCAGGTATAGTAGGAACTTCTTTAAGATTATTAATTCGTACTGAATTAGGTAATCCTGGATCTTTAATTGGAGATGATCAAATTTATAATACTATTGTAACAGCTCATGCTTTTATTATAATTTTTTTTATAGTTATACCAATTATAATTGGAGGATTTGGAAATTGATTAATTCCTTTAATATTAGGAGCCCCAGATATAGCTTTTCCTCGAATAAATAATATAAGATTTTGATTATTACCCCCTTCATTAACTTTACTAATTTCCAGAAGAATTGTAGAAAATGGGGCAGGAACTGGATGAACAGTCTACCCTCCTTTATCATCTAATATTGCTCACGGAGGAAGATCTGTTGATTTAGCTATTTTTTCCTTACATTTAGCGGGAATTTCATCTATTTTAGGAGCCATTAATTTTATTACAACTATTATTAATATACGAATTAATCATATATCATTTGATCAAATACCTCTTTTTGTATGAGCAGTAGGAATTACTGCTTTACTTTTATTATTATCTCTACCTGTTTTAGCAGGTGCTATTACTATATTATTAACAGATCGAAATCTTAATACTTCATTTTTTGACCCAGCAGGAGGTGGAGATCCTATTTTATATCAACACTTA

Parnassius_stubbendorfii_2005_LOWA_154 ACATTATATTTTATTTTTGGTATTTGAGCAGGTATAGTAGGAACTTCTTTAAGATTATTAATTCGTACTGAATTAGGTAATCCTGGATCTTTAATTGGAGATGATCAAATTTATAATACTATTGTAACAGCTCATGCTTTTATTATAATTTTTTTTATAGTTATACCAATTATAATTGGAGGATTTGGAAATTGATTAATTCCTTTAATATTAGGAGCCCCAGATATAGCTTTTCCTCGAATAAATAATATAAGATTTTGATTATTACCCCCTTCATTAACTTTACTAATTTCCAGAAGAATTGTAGAAAATGGAGCAGGAACTGGATGAACAGTCTACCCTCCTTTATCATCTAATATTGCTCACGGAGGAAGATCTGTTGATTTAGCTATTTTTTCCTTACATTTAGCGGGAATTTCATCTATTTTAGGAGCCATTAATTTTATTACAACTATTATTAATATACGAATTAATCATATATCATTTGATCAAATACCTCTTTTTGTATGAGCAGTAGGAATTACTGCTTTACTTTTATTATTATCTCTACCTGTTTTAGCAGGTGCTATTACTATATTATTAACAGATCGAAATCTTAATACTTCATTTTTTGACCCAGCAGGAGGTGGAGATCCTATTTTATATCAACACTTA

Parnassius_stubbendorfii_2005_LOWA_153 -CATTATATTTTATTTTTGGTATTTGAGCAGGTATAGTAGGAACTTCTTTAAGATTATTAATTCGTACTGAATTAGGTAATCCTGGATCTTTAATTGGAGATGATCAAATTTATAATACTATTGTAACAGCTCATGCTTTTATTATAATTTTTTTTATAGTTATACCAATTATAATTGGAGGATTTGGAAATTGATTAATTCCTTTAATATTAGGAGCCCCAGATATAGCTTTTCCTCGAATAAATAATATAAGATTTTGATTATTACCCCCTTCATTAACTTTACTAATTTCCAGAAGAATTGTAGAAAATGGAGCAGGAACTGGATGAACAGTCTACCCTCCTTTATCATCTAATATTGCTCACGGAGGAAGATCTGTTGATTTAGCTATTTTTTCCTTACATTTAGCGGGAATTTCATCTATTTTAGGAGCCATTAATTTTATTACAACTATTATTAATATACGAATTAATCATATATCATTTGATCAAATACCTCTTTTTGTATGAGCAGTAGGAATTACTGCTTTACTTTTATTATTATCTCTACCTGTTTTAGCAGGTGCTATTACTATATTATTAACAGATCGAAATCTTAATACTTCATTTTTTGACCCAGCAGGAGGTGGAGATCCTATTTTATATCAACACTTA

Parnassius_nordmanni ACATTATATTTTATTTTTGGTATTTGAGCAGGTATAGTAGGAACTTCTTTAAGATTATTAATTCGTACTGAATTAGGTAATCCTGGATCTCTAATTGGAGATGATCAAATTTACAATACTATCGTAACAGCTCATGCTTTTATTATAATTTTTTTCATAGTTATACCAATTATAATTGGAGGATTTGGAAATTGATTAATTCCATTAATATTAGGAGCTCCAGATATAGCTTTCCCCCGAATAAATAATATAAGATTTTGATTATTACCCCCCTCATTAACTCTATTAATTTCTAGAAGAATTGTAGAAAATGGGGCAGGAACTGGATGAACAGTTTACCCCCCTTTATCATCTAATATTGCTCATAGAGGAAGATCAGTTGACTTAGCTATTTTTTCTTTACATTTGGCTGGGATTTCTTCTATTTTAGGAGCTATTAATTTTATCACAACTATTGTTAATATACGAATTAACTATATATCATTTGATCAAATACCTCTTTTCGTATGAGCAGTAGGAATTACTGCTTTACTTTTATTATTATCTTTACCTGTTTTAGCAGGTGCTATTACTATATTATTAACAGATCGAAATCTTAATACTTCATTTTTTGATCCAGCAGGAGG?GGAGACCCTATTCTATATCAA------

Parnassius_eversmanni ACATTATATTTTATTTTTGGTATTTGAGCAGGTATAGTAGGAACCTCTTTAAGATTATTAATTCGTTCTGAATTAGGTAATCCTGGATCTTTAATTGGAGATGATCAAATTTATAATACTATTGTAACAGCTCATGCTTTTATTATAATTTTTTTTATAGTTATACCAATTATAATTGGAGGATTTGGAAATTGATTAATTCCATTAATATTAGGAGCTCCAGATATAGCTTTTCCTCGAATAAATAATATAAGATTTTGATTATTACCCCCCTCATTAACCTTACTAATTTCTAGAAGAATTGTAGAAAATGGAGCAGGAACTGGATGAACGGTTTATCCCCCTTTATCATCTAATATTGCTCATAGAGGAAGATCAGTTGATTTAGCTATCTTTTCTTTACATTTAGCTGGAATTTCATCTATCTTAGGAGCTATTAATTTTATTACAACTATTATTAATATACGAATTAATCATATATCATTTGATCAAATACCCCTTTTTGTATGAGCAGTAGGAATTACTGCTTTACTTTTATTATTATCTTTACCTGTTTTAGCAGGTGCTATTACCATATTATTAACAGATCGAAATCTTAATACTTCATTTTTTGACCCAGCAGGAGGTGGAGATCCTATTTTATATCAA------

Parnassius_eversmanni_felderi ACATTATATTTTATTTTTGGTATTTGAGCAGGTATAGTAGGAACCTCTTTAAGATTATTAATTCGTTCTGAATTAGGTAATCCTGGATCTTTAATTGGAGATGATCAAATTTATAATACTATTGTAACAGCTCATGCTTTTATTATAATTTTTTTTATAGTTATACCAATTATAATTGGAGGATTTGGAAATTGATTAATTCCATTAATATTAGGAGCTCCAGATATAGCTTTTCCTCGAATAAATAATATAAGATTTTGATTATTACCCCCCTCATTAACCTTACTAATTTCTAGAAGAATTGTAGAAAATGGAGCAGGAACTGGATGAACGGTTTATCCCCCTTTATCATCTAATATTGCTCATAGAGGAAGATCAGTTGATTTAGCTATCTTTTCTTTACA?TTAGCTGGAATTTCATCTATCTTAGGAGCTATTAATTTTATTACAACTATTATTAATATACGAATTAATCATATATCATTTGATCAAATACCCCTTTTTGTATGAGCAGTAGGAATTACTGCTTTACTTTTATTATTATCTTTACCTGTTTTAGCAGGTGCTATTACCATATTATTAACAGATCGAAATCTTAATACTTCATTTTTTGACCCAGCAGGAGGTGGAGATCCTATTTTATATCAA------

Parnassius_ariadne_ariadne ACATTATATTTTATTTTTGGTATTTGAGCAGGTATAGTAGGAACCTCTTTAAGATTATTAATTCGTACTGAATTAGGTAATCCTGGATCTTTAATTGGAGATGATCAAATTTATAATACTATCGTAACAGCTCATGCTTTTATTATAATTTTTTTTATAGTTATACCAATTATAATTGGAGGATTTGGAAATTGATTAATTCCTTTAATATTAGGAGCTCCAGATATAGCCTTTCCTCGAATAAATAATATAAGATTTTGATTACTACCCCCCTCATTAACTTTATTAATCTCTAGAAGAATTGTAGAAAATGGAGCAGGAACTGGATGAACAGTTTATCCCCCTTTATCATCTAATATTGCTCATAGAGGAAGTTCAGTTGATTTAGCCATTTTCTCTTTACATTTAGCAGGAATTTCATCAATTTTAGGAGCTATTAATTTTATCACAACTATTATTAATATACGAATTAATCATATATCATTTGATCAAATACCCCTTTTTGTTTGAGCAGTAGGAATTACTGCTTTACTATTATTATTATCTTTACCTGTATTAGCTGGTGCTATTACTATATTATTAACAGATCGAAATCTTAATACTTCATTTTTTGATCCAGCAGGA????GAGATCCTATTTTATATCAA------

Parnassius_glacialis_mikado ACATTATATTTTATTTTTGGTATTTGAGCAGGTATAGTAGGAACCTCCTTAAGATTATTAATTCGTACTGAATTAGGTAATCCTGGATCTTTAATTGGAGATGATCAAATTTATAATACTATTGTAACAGCTCATGCTTTTATTATAATTTTTTTTATAGTTATACCAATTATAATTGGAGGATTTGGAAATTGATTAATCCCTTTAATATTAGGAGCTCCAGATATAGCTTTCCCCCGAATAAATAATATAAGATTTTGATTATTACCCCCCTCATTAACTTTACTAATTTCCAGAAGAATTGTAGAAAATGGAGCAGGAACAGGATGAACAGTTTATCCCCCATTATCCTCTAATATTGCCCACAGAGGAAGATCTGTTGATTTAGCTATTTTTTCTTTACATTTAGCAGGAATTTCATCTATTCTAGGAGCTATTAATTTTATTACAACTATTATTAATATACGAATTAATCATATATCATTTGATCAAATACCTCTCTTTGTTTGAGCAGTAGGAATTACTGCTTTACTTTTATTATTATCCCTACCTGTTTTAGCAGGTGCTATTACTATATTATTAACAGATCGAAATCTTAATACTTCTTTTTTTGACCCAGCAGGAGGTGGAGATCCAATTTTATATCAA------

Parnassius_stubbendorfii_hoenei ACATTATATTTTATTTTTGGTATTTGAGCAGGAATAGTAGGAACCTCCCTAAGATTATTAATTCGTACTGAATTAGGTAATCCCGGATCTTTAATTGGAGATGATCAAATTTACAATACTATTGTAACAGCTCATGCTTTCATTATAATTTTTTTTATAGTTATACCAATTATAATTGGAGGATTTGGAAATTGACTGATTCCTTTAATATTAGGAGCCCCAGATATAGCTTTCCCCCGAATAAATAATATAAGATTTTGATTACTACCCCCCTCATTAACTTTATTAATTTCTAGAAGAATTGTAGAAAATGGAGCAGGAACTGGATGAACAGTCTATCCCCCTTTATCATCTAATATTGCCCATAGAGGAAGATCCGTTGATTTAGCTATTTTTTCCTTACATTTAGCAGGAATTTCATCTATTTTAGGAGCCATTAATTTTATTACAACTATTATTAATATACGAATTAATCATATATCATTTGATCAAATACCTCTTTTTGTATGAGCAGTAGGAATTACTGCTTTACTTTTATTATTATCTTTACCTGTTTTAGCAGGTGCTATTACTATATTATTAACAGATCGAAATCTTAATACTTCCTTTTTTGACCCAGCAGGAGGTGGAGATCCTATTTTATACCAA------

Parnassius_stubbendorfii_hoenei_AC20_16 ------------------------TGAGCAGGAATAGTAGGAACCTCCCTAAGATTATTAATTCGTACTGAATTAGGTAATCCCGGATCTTTAATTGGAGATGATCAAATTTACAATACTATTGTAACAGCTCATGCTTTCATTATAATTTTTTTTATAGTTATACCAATTATAATTGGAGGATTTGGAAATTGACTGATTCCTTTAATATTAGGAGCCCCAGATATAGCTTTCCCCCGAATAAATAATATAAGATTTTGATTACTACCCCCCTCATTAACTTTATTAATTTCTAGAAGAATTGTAGAAAATGGAGCAGGAACTGGATGAACAGTCTATCCCCCTTTATCATCTAATATTGCCCATAGAGGAAGATCCGTTGATTTAGCTATTTTTTCCTTACATTTAGCAGGAATTTCATCTATTTTAGGAGCCATTAATTTTATTACAACTATTATTAATATACGAATTAATCATATATCATTTGATCAAATACCTCTTTTTGTATGAGCAGTAGGAATTACTGCTTTACTTTTATTATTATCTTTACCTGTTTTAGCAGGTGCTATTACTATATTATTAACAGATCGAAATCTTAATACTTCCTTTTTTGACCCCGCAGGAGGTGGAGATCCTATTTTATACCAACATTTA

Parnassius_stubbendorfii_koreanus ------------------------TGAGCAGGTATAGTAGGAACTTCTTTAAGATTATTAATTCGTACTGAATTAGGTAATCCTGGATCTTTAATTGGAGATGATCAAATTTATAATACTATTGTAACAGCTCATGCTTTTATTATAATTTTTTTTATAGTTATACCAATTATAATTGGAGGATTTGGAAATTGATTAATTCCTTTAATATTAGGAGCCCCAGATATAGCTTTTCCTCGAATAAATAATATAAGATTTTGACTATTACCCCCCTCATTAACTTTACTAATTTCCAGAAGAATTGTAGAAAATGGAGCAGGAACTGGATGAACAGTCTACCCTCCTTTATCATCTAATATTGCTCACGGAGGAAGATCTGTTGATTTAGCTATTTTTTCCTTACATTTAGCAGGAATTTCATCTATTTTAGGAGCCATTAATTTTATTACAACTATTATTAATATACGAATTAATCATATATCATTTGATCAAATACCTCTTTTTGTATGAGCAGTAGGAATTACTGCTTTACTTTTATTATTATCTCTACCTGTTTTAGCAGGTGCTATTACTATATTATTAACAGATCGAAATCTTAATACTTCATTTTTTGACCCAGCAGGAGGTGGAGATCCTATTTTATATCAACACTTA

Parnassius_nordmanni_AC20_5 ------------------------TGAGCAGGTATAGTAGGAACTTCTTTAAGATTATTAATTCGTACTGAATTAGGTAATCCTGGATCTCTAATTGGAGATGATCAAATTTACAATACTATCGTAACAGCTCATGCTTTTATTATAATTTTTTTCATAGTTATACCAATTATAATTGGAGGATTTGGAAATTGATTAATTCCATTAATATTAGGAGCTCCAGATATAGCTTTCCCCCGAATAAATAATATAAGATTTTGATTATTACCCCCCTCATTAACTCTATTAATTTCTAGAAGAATTGTAGAAAATGGGGCAGGAACTGGATGAACAGTTTACCCCCCTTTATCATCTAATATTGCTCATAGAGGAAGATCAGTTGACTTAGCTATTTTTTCTTTACATTTGGCTGGGATTTCTTCTATTTTAGGAGCTATTAATTTTATCACAACTATTGTTAATATACGAATTAACTATATATCATTTGATCAAATACCTCTTTTCGTATGAGCAGTAGGAATTACTGCTTTACTTTTATTATTATCTTTACCTGTTTTAGCAGGTGCTATTACTATATTATTAACAGATCGAAATCTTAATACTTCATTTTTTGATCCAGCAGGAGGTGGAGACCCTATTCTATATCAACATTTA

Parnassius_eversmanni_felderi_AC23_68 ------------------------TGAGCAGGTATAGTAGGAACCTCTTTAAGATTATTAATTCGTTCTGAATTAGGTAATCCTGGATCTTTAATTGGAGATGATCAAATTTATAATACTATTGTAACAGCTCATGCTTTTATTATAATTTTTTTTATAGTTATACCAATTATAATTGGAGGATTTGGAAATTGATTAATTCCATTAATATTAGGAGCTCCAGATATAGCTTTTCCTCGAATAAATAATATAAGATTTTGATTATTACCCCCCTCATTAACCTTACTAATTTCTAGAAGAATTGTAGAAAATGGAGCAGGAACTGGATGAACGGTTTATCCCCCTTTATCATCTAATATTGCTCATAGAGGAAGATCAGTTGATTTAGCTATCTTTTCTTTACATTTAGCTGGAATTTCATCTATCTTAGGAGCTATTAATTTTATTACAACTATTATTAATATACGAATTAATCATATATCATTTGATCAAATACCCCTTTTTGTATGAGCAGTAGGAATTACTGCTTTACTTTTATTATTATCTTTACCTGTTTTAGCAGGTGCTATTACCATATTATTAACAGATCGAAATCTTAATACTTCATTTTTTGACCCAGCAGGAGGTGGAGATCCTATTTTATTTCAACATTTA

Parnassius_eversmanni_eversmanni_AC1_14 ------------------------TGATCAGGTATAGTAGGAACCTCTTTAAGATTATTAATTCGTTCTGAATTAGGTAATCCTGGATCTTTAATTGGAGATGATCAAATTTATAATACTATTGTAACAGCTCATGCTTTTATTATAATTTTTTTTATAGTTATACCAATTATAATTGGAGGATTTGGAAATTGATTAATTCCATTAATATTAGGAGCTCCAGATATAGCTTTTCCTCGAATAAATAATATAAGATTTTGATTATTACCCCCCTCATTAACCTTACTAATTTCTAGAAGAATTGTAGAAAATGGAGCAGGAACTGGATGAACGGTTTATCCCCCTTTATCATCTAATATTGCTCATAGAGGAAGATCAGTTGATTTAGCTATCTTTTCTTTACATTTAGCTGGAATTTCATCTATCTTAGGAGCTATTAATTTTATTACAACTATTATTAATATACGAATTAATCATATATCATTTGATCAAATACCCCTTTTTGTATGAGCAGTAGGAATTACTGCTTTACTTTTATTATTATCTTTACCTGTTTTAGCAGGTGCTATTACCATATTATTAACAGATCGAAATCTCAATACTTCATTTTTTGACCCAGCAGGAGGTGGAGATCCTATTTTATATCAACATTTA

Parnassius_clodius_AC4_5 ------------------------TGAGCAGGAATATTAGGAACCTCTTTAAGATTATTAATTCGTACTGAATTAGGTAATCCTGGATCTTTAATTGGAGATGATCAAATTTATAATACTATTGTAACAGCTCATGCTTTTATCATAATTTTTTTCATAGTTATACCAATTATAATTGGAGGATTTGGAAATTGATTAATTCCATTAATATTAGGAGCTCCAGATATAGCTTTTCCTCGAATAAATAATATAAGATTTTGATTATTACCCCCTTCATTAACTTTATTAATTTCTAGAAGAATTGTAGAAAATGGAGCAGGAACTGGATGAACAGTTTATCCCCCTTTATCATCTAATATTGCTCATAGAGGAAGATCAGTTGATTTAGCTATTTTTTCTTTACATTTAGCTGGAATTTCATCTATCTTAGGAGCTATTAATTTTATTACAACTATTATTAATATACGAATTAATCATATATCATTTGATCAAATACCCCTTTTTGTATGAGCAGTAGGAATTACCGCTTTACTTCTATTATTATCTTTACCTGTTTTAGCAGGTGCTATTACCATATTATTAACAGATCGAAATCTTAATACTTCATTTTTTGATCCAGCAGGAGGTGGAGATCCTATTTTATATCAACACTTA

Parnassius_ariadne_AC4_14 ------------------------TGAGCAGGTATAGTAGGAACCTCTTTAAGATTATTAATTCGTACTGAATTAGGTAATCCTGGATCTTTAATTGGAGATGATCAAATTTATAATACTATCGTAACAGCTCATGCTTTTATTATAATTTTTTTTATAGTTATACCAATTATAATTGGAGGATTTGGAAATTGATTAATTCCTTTAATATTAGGAGCTCCAGATATAGCCTTTCCTCGAATAAATAATATAAGATTTTGATTACTACCCCCCTCATTAACTTTATTAATCTCTAGAAGAATTGTAGAAAATGGAGCAGGAACTGGATGAACAGTTTATCCCCCTTTATCATCTAATATTGCTCATAGAGGAAGTTCAGTTGATTTAGCCATTTTCTCTTTACATTTAGCAGGAATTTCATCAATTTTAGGAGCTATTAATTTTATCACAACTATTATTAATATACGAATTAATCATATATCATTTGATCAAATACCCCTTTTTGTTTGAGCAGTAGGAATTACTGCTTTACTATTATTATTATCTTTACCTGTATTAGCTGGTGCTATTACTATATCATTAACAGATCGAAATCTTAATACTTCATTTTTTGATCCAGCAGGAGGTGGAGATCCTATTTTATATCAACACTTA

HQ004911_RV_07_C107_Romania ACACTATATTTTATTTTTGGTATTTGAGCAGGTATAGTAGGAACCTCTTTAAGATTATTAATTCGTACTGAATTAGGTAATCCTGGATCTTTAATTGGAGATGATCAAATTTATAATACTATTGTAACAGCTCATGCTTTTATTATAATTTTTTTTATAGTTATACCAATTATAATTGGAGGATTTGGAAATTGATTAATTCCTTTAATATTAGGAGCCCCAGATATAGCTTTTCCTCGAATAAATAATATAAGATTTTGATTACTACCCCCCTCATTAACTTTATTAATTTCTAGAAGAATTGTAGAAAATGGAGCAGGAACAGGATGAACAGTTTATCCCCCTTTATCATCTAATATCGCTCATAGAGGTAGTTCAGTTGATTTAGCTATTTTTTCTTTACATTTAGCAGGAATTTCATCAATCTTAGGAGCTATTAATTTTATTACAACTATTATTAATATACGAATTAACCATATATCATTTGATCAAATACCTCTCTTTGTATGAGCAGTAGGAATTACTGCTTTACTTTTATTATTATCTTTACCTGTATTAGCTGGTGCTATTACTATATTATTAACAGATCGAAATCTTAATACTTCATTTTTTGATCCTGCAGGAGGTGGAGATCCTATTTTATATCAACATTTA

HQ004908_RV_07_D060_Romania ACACTATATTTTATTTTTGGTATTTGAGCAGGTATAGTAGGAACCTCTTTAAGATTATTAATTCGTACTGAATTAGGTAATCCTGGATCTTTAATTGGAGATGATCAAATTTATAATACTATTGTAACAGCTCATGCTTTTATTATAATTTTTTTTATAGTTATACCAATTATAATTGGAGGATTTGGAAATTGATTAATTCCTTTAATATTAGGAGCCCCAGATATAGCTTTTCCTCGAATAAATAATATAAGATTTTGATTACTACCCCCCTCATTAACTTTATTAATTTCTAGAAGAATTGTAGAAAATGGAGCAGGAACAGGATGAACAGTTTATCCCCCTTTATCATCTAATATCGCTCATAGAGGTAGTTCAGTTGATTTAGCTATTTTTTCTTTACATTTAGCAGGAATTTCATCAATCTTAGGAGCTATTAATTTTATTACAACTATTATTAATATACGAATTAACCATATATCATTTGATCAAATACCTCTCTTTGTATGAGCAGTAGGAATTACTGCTTTACTTTTATTATTATCTCTACCTGTATTAGCTGGTGCTATTACTATATTATTAACAGATCGAAATCTTAATACTTCATTTTTTGATCCTGCAGGAGGTGGAGATCCTATTTTATATCAACATTTA

HQ004907_RV_08_M274_Romania ACACTATATTTTATTTTTGGTATTTGAGCAGGTATAGTAGGAACCTCTTTAAGATTATTAATTCGTACTGAATTAGGTAATCCTGGATCTTTAATTGGAGATGATCAAATTTATAATACTATTGTAACAGCTCATGCTTTTATTATAATTTTTTTTATAGTTATACCAATTATAATTGGAGGATTTGGAAATTGATTAATTCCTTTAATATTAGGAGCCCCAGATATAGCTTTTCCTCGAATAAATAATATAAGATTTTGATTACTACCCCCCTCATTAACTTTATTAATTTCTAGAAGAATTGTAGAAAATGGAGCAGGAACAGGATGAACAGTTTATCCCCCTTTATCATCTAATATCGCTCATAGAGGTAGTTCAGTTGATTTAGCTATTTTTTCTTTACATTTAGCAGGAATTTCATCAATCTTAGGAGCTATTAATTTTATTACAACTATTATTAATATACGAATTAACCATATATCATTTGATCAAATACCTCTATTTGTATGAGCAGTAGGAATTACTGCTTTACTTTTATTATTATCTTTACCTGTATTAGCTGGTGCTATTACTATATTATTAACAGATCGAAATCTTAATACTTCATTTTTTGATCCTGCAGGAGGTGGAGATCCTATTTTATATCAACATTTA

HQ004902_RV_08_M361_Romania ACACTATATTTTATTTTTGGTATTTGAGCAGGTATAGTAGGAACCTCTTTAAGATTATTAATTCGTACTGAATTAGGTAATCCTGGATCTTTAATTGGAGATGATCAAATTTATAATACTATTGTAACAGCTCATGCTTTTATTATAATTTTTTTTATAGTTATACCAATTATAATTGGAGGATTTGGAAATTGATTAATTCCCTTAATATTAGGAGCCCCAGATATAGCTTTTCCTCGAATAAATAATATAAGATTTTGATTACTACCCCCCTCATTAACTTTATTAATTTCTAGAAGAATTGTAGAAAATGGAGCAGGAACAGGATGAACAGTTTATCCCCCTTTATCATCTAATATCGCTCATAGAGGTAGTTCAGTTGATTTAGCTATTTTTTCTTTACATTTAGCAGGAATTTCATCAATCTTAGGAGCTATTAATTTTATTACAACTATTATTAATATACGAATTAACCATATATCATTTGATCAAATACCTCTCTTTGTATGAGCAGTAGGAATTACTGCTTTACTTTTATTATTATCTTTACCTGTATTAGCTGGTGCTATTACTATATTATTAACAGATCGAAATCTTAATACTTCATTTTTTGATCCTGCAGGAGGTGGAGATCCTATTTTATATCAACATTTA

GU947642_Pmne_ITNEB01_Italy_Sicily ----------------------------------------------------------------------------------------------------------------------------------------------------------------------------------------------------------------------------------------------------------------------------CCCCTTCATTAACCTTATTAATTTCTAGAAGAATTGTAGAAAATGGAGCAGGAACTGGATGAACAGTTTACCCCCCTTTATCATCTAATATTGCTCATAGAGGAAGTTCAGTTGATTTAGCTATTTTTTCCTTACATTTAGCGGGAATTTCATCAATCTTAGGAGCTATTAATTTTATTACAACTATTATTAATATACGAATTAATCATATATCATTCGATCAAATACCTCTTTTTGTATGAGCAGTAGGAATTACTGCTTTACTTTTATTATTATCTTTACCTGTATTAGCTGGTGCTATTACTATATTATTAACAGATCGAAATCTTAATACTTCATTTTTTGATCCCGCAGGAGGTGGTGATCCTATTTTATACCAACATTTA

EU093018_Ca995 -----------------------------------------------------------------------------------------------------------------------------------------------------------------------------------------------------------TTTAATATTAGGAGCCCCAGATATAGCTTTTCCTCGAATAAATAATATAAGATTTTGATTACTGCCCCCCTCATTAACTTTATTAATTTCTAGAAGAATTGTAGAAAATGGAGCAGGAACAGGATGAACAGTTTATCCCCCTTTATCATCTAATATCGCTCATAGAGGTAGTTCAGTTGATTTAGCTATTTTTTCTTTACATTTAGCAGGAATTTCATCAATCTTAGGAGCTATTAATTTTATTACAACTATTATTAATATACGAATTAACCATATATCATTTGATCAAATACCTCTCTTTGTATGAGCAGTAGGAATTACTGCTTTACTTTTATTATTATCTTTACCTGTATTAGCTGGTGCTATTACTATATTATTAACAGATCGAAATCTTAATACTTCATTTTTTGATCCTGCAGGAGGTGGAGATCCTATTTTATATCAACATTTA

EU093017_Ch892 -----------------------------------------------------------------------------------------------------------------------------------------------------------------------------------------------------------TTTAATATTAGGAGCCCCAGATATAGCTTTCCCCCGAATAAATAATATAAGATTTTGATTACTACCCCCTTCATTAACCTTATTAATTTCTAGAAGAATTGTAGAAAATGGAGCAGGAACTGGATGAACAGTTTACCCCCCTTTATCATCTAATATTGCTCATAGAGGAAGTTCAGTTGATTTAGCTATTTTTTCCCTACATTTAGCGGGAATTTCATCAATCTTAGGAGCTATTAATTTTATTACAACTATTATCAATATACGAATTAATCATATATCATTCGATCAAATACCTCTTTTTGTATGAGCAGTAGGAATTACTGCTTTACTTTTATTATTATCCTTACCTGTATTAGCTGGTGCTATTACTATATTATTAACAGATCGAAATCTTAATACTTCATTTTTTGATCCAGCAGGAGGTGGTGATCCTATTTTATATCAACATTTA

EU093016_Tk889 -----------------------------------------------------------------------------------------------------------------------------------------------------------------------------------------------------------TTTAATATTAGGAGCCCCAGATATAGCTTTTCCTCGAATAAATAATATAAGATTTTGATTACTACCCCCCTCATTAACTTTATTAATTTCTAGAAGAATTGTAGAAAATGGAGCAGGAACAGGATGAACAGTTTATCCCCCTTTATCATCTAATATTGCTCATAGAATTAGTTCAGTTGATTTAGCTATTTTTTCTTTACATTTAGCAGGAATTTCATCAATCTTAGGAGCTATTAATTTTATTACAACTATTATTAATATACGAATTAATCATTTATCATTTGATCAAATACCCCTCTTTGTATGAGCAGTAGGAATTACTGCTTTACTTTTATTATTATCTTTACCTGTATTAGCTGGTGCTATTACTATATTATTAACAGATCGAAATCTTAATACTTCATTTTTTGATCCTGCAGGAGGTGGAGATCCTATTTTATATCAACATTTA

EU093015_It878 -----------------------------------------------------------------------------------------------------------------------------------------------------------------------------------------------------------TTTAATATTAGGAGCCCCAGATATAGCTTTCCCCCGAATAAATAATATAAGATTTTGATTACTACCCCCTTCATTAACCTTATTAATTTCTAGAAGAATTGTAGAAAATGGAGCAGGAACTGGATGAACAGTTTACCCCCCTTTATCATCTAATATTGCTCATAGAGGAAGTTCAGTTGATTTAGCTATTTTTTCCTTACATTTAGCGGGAATTTCATCAATCTTAGGAGCTATTAATTTTATTACAACTATTATTAATATACGAATTAATCATATATCATTCGATCAAATACCTCTTTTTGTATGAGCAGTAGGAATTACTGCTTTACTTTTATTATTATCTTTACCTGTATTAGCTGGTGCTATTACTATATTATTAACAGATCGAAATCTTAATACTTCATTTTTTGATCCAGCAGGAGGTGGTGATCCTATTTTATACCAACATTTA

EU093014_Hu875 -----------------------------------------------------------------------------------------------------------------------------------------------------------------------------------------------------------TTTAATATTAGGAGCCCCAGATATAGCTTTTCCTCGAATAAATAATATAAGATTTTGATTACTACCCCCCTCATTAACTTTATTAATTTCTAGAAGAATTGTAGAAAATGGAGCAGGAACAGGATGAACAGTTTATCCCCCTTTATCATCTAATATCGCTCATAGAGGTAGTTCAGTTGATTTAGCTATTTTTTCTTTACATTTAGCGGGAATTTCATCAATCTTAGGAGCTATTAATTTTATTACAACTATTATTAATATACGAATTAACCATATATCATTTGATCAAATACCTCTCTTTGTATGAGCAGTAGGAATTACTGCTTTACTTTTATTATTATCTTTACCTGTATTAGCTGGTGCTATTACTATATTATTAACAGATCGAAATCTTAATACTTCATTTTTTGATCCTGCAGGAGGTGGAGATCCTATTTTATATCAACATTTA

EU093013_Sk872_Cz_Slova -----------------------------------------------------------------------------------------------------------------------------------------------------------------------------------------------------------TTTAATATTAGGAGCCCCAGATATAGCTTTTCCTCGAATAAATAATATAAGATTTTGATTACTACCCCCCTCATTAACTTTATTAATTTCTAGAAGAATTGTAGAAAATGGAGCAGGAACAGGATGAACAGTTTATCCCCCTTTATCATCTAATATCGCTCATAGAGGTAGTTCAGTTGATTTAGCTATTTTTTCTTTACATTTGGCAGGAATTTCATCAATCTTAGGAGCTATTAATTTTATTACAACTATTATTAATATACGAATTAATCATATATCATTTGATCAAATACCTCTCTTTGTATGAGCAGTAGGAATTACTGCTTTACTTTTATTATTATCTTTACCTGTATTAGCTGGTGCTATTACTATATTATTAACAGATCGAAATCTTAATACTTCATTTTTTGATCCTGCAGGAGGTGGAGATCCTATTTTATATCAACATTTA

EU093011_Cz869 -----------------------------------------------------------------------------------------------------------------------------------------------------------------------------------------------------------TTTAATATTAGGAGCCCCAGATATAGCTTTTCCTCGAATAAATAATATAAGATTTTGATTACTACCCCCCTCATTAACTTTATTAATTTCTAGAAGAATTGTAGAAAATGGAGCAGGAACAGGATGAACAGTTTATCCCCCTTTATCATCTAATATTGCTCATAGAGGTAGTTCAGTTGATTTAGCTATTTTTTCTTTACATTTAGCAGGAATTTCATCAATCTTAGGAGCTATTAATTTTATTACAACTATTATTAATATACGAATTAACCATATATCATTTGATCAAATACCTCTCTTTGTATGAGCAGTAGGAATTACTGCTTTACTTTTATTATTATCTTTACCTGTATTAGCTGGTGTTATTACTATATTATTAACAGATCGAAATCTTAATACTTCATTTTTTGATCCTGCAGGAGGTGGAGATCCTATTTTATATCAACATTTA

EU093010_Ru_Bosnia_Fi_Bu_Hu_Bel_Po_Rom_Ukr_ -----------------------------------------------------------------------------------------------------------------------------------------------------------------------------------------------------------TTTAATATTAGGAGCCCCAGATATAGCTTTTCCTCGAATAAATAATATAAGATTTTGATTACTACCCCCCTCATTAACTTTATTAATTTCTAGAAGAATTGTAGAAAATGGAGCAGGAACAGGATGAACAGTTTATCCCCCTTTATCATCTAATATCGCTCATAGAGGTAGTTCAGTTGATTTAGCTATTTTTTCTTTACATTTAGCAGGAATTTCATCAATCTTAGGAGCTATTAATTTTATTACAACTATTATTAATATACGAATTAACCATATATCATTTGATCAAATACCTCTCTTTGTATGAGCAGTAGGAATTACTGCTTTACTTTTATTATTATCTTTACCTGTATTAGCTGGTGCTATTACTATATTATTAACAGATCGAAATCTTAATACTTCATTTTTTGATCCTGCAGGAGGTGGAGATCCTATTTTATATCAACATTTA

EU093009_Kz848 -----------------------------------------------------------------------------------------------------------------------------------------------------------------------------------------------------------TTTAATATTAGGGGCCCCAGATATAGCTTTTCCTCGAATAAATAATATAAGATTTTGATTATTACCCCCTTCATTAACTTTATTAATTTCTAGAAGAATTGTAGAAAATGGAGCAGGAACAGGATGAACAGTTTATCCCCCTTTATCATCTAATATCGCTCATAGAGGTAGTTCAGTTGATTTAGCTATTTTTTCTTTACATTTAGCAGGAATTTCATCAATCTTAGGAGCTATTAATTTTATTACAACTATTATTAATATACGAATTAATCATATATCATTTGATCAAATACCTCTCTTTGTATGAGCAGTAGGAATTACTGCTTTACTTTTATTACTATCTTTACCTGTATTAGCTGGTGCTATTACTATATTATTAACAGATCGAAATCTTAATACTTCATTTTTTGATCCTGCAGGAGGTGGAGATCCTATTTTATATCAACATTTA

EU093007_Fi810 -----------------------------------------------------------------------------------------------------------------------------------------------------------------------------------------------------------TTTAATATTAGGAGCCCCAGATATAGCCTTTCCTCGAATAAATAATATAAGATTTTGATTACTACCCCCCTCATTAACTTTATTAATTTCTAGAAGAATTGTAGAAAATGGAGCAGGAACAGGATGAACAGTTTATCCCCCTTTATCATCTAATATCGCTCATAGAGGTAGTTCAGTTGATTTAGCTATTTTTTCTTTACATTTAGCAGGAATTTCATCAATCTTAGGAGCTATTAATTTTATTACAACTATTATTAATATACGAATTAACCATATATCATTTGATCAAATACCTCTCTTTGTATGAGCAGTAGGAATTACTGCTTTACTTTTATTATTATCTTTACCTGTATTAGCTGGTGCTATTACTATATTATTAACAGATCGAAATCTTAATACTTCATTTTTTGATCCTGCAGGAGGTGGAGATCCTATTTTATATCAACATTTA

EU093004_Tu999 -----------------------------------------------------------------------------------------------------------------------------------------------------------------------------------------------------------TTTAATATTAGGAGCTCCAGATATAGCTTTTCCTCGAATAAATAACATAAGATTTTGATTACTCCCCCCTTCATTAACTTTATTAATTTCTAGAAGAATTGTAGAAAATGGAGCAGGAACAGGATGAACAGTTTATCCCCCTTTATCATCTAATATTGCTCATAGAGGTAGTTCAGTTGATTTAGCTATTTTTTCTTTACATTTAGCAGGAATTTCATCAATCTTAGGAGCTATTAATTTTATTACAACTATTATTAATATACGAATTAATAATATATCATTTGATCAAATACCTCTTTTTGTATGAGCAGTAGGAATTACTGCATTACTTTTATTATTATCTTTACCTGTATTAGCTGGTGCTATTACTATATTATTAACAGATCGAAATCTTAATACTTCATTTTTTGATCCCGCAGGAGGTGGAGATCCTATTTTATATCAACACTTA

EU093000_Bu961 -----------------------------------------------------------------------------------------------------------------------------------------------------------------------------------------------------------TTTAATATTAGGAGCCCCAGATATAGCTTTTCCTCGAATAAATAATATAAGATTTTGATTACTACCCCCCTCATTAACTTTATTAATTTCTAGAAGAATTGTAGAAAATGGAGCAGGAACAGGATGAACAGTTTATCCCCCTTTATCATCTAATATCGCTCATAGAGGTAGTTCAGTTGATTTAGCTATTTTTTCTTTACATTTAGCAGGAATTTCATCAATCTTAGGAGCTATTAATTTTATTACAACTATTATTAATATACGAATTAATCATATATCATTTGATCAAATACCTCTCTTTGTATGAGCAGTAGGAATTACTGCTTTACTTTTATTATTATCTTTACCTGTATTAGCTGGTGCTATTACTATATTATTAACAGATCGAAATCTTAATACTTCATTTTTTGATCCTGCAGGAGGTGGAGATCCTATTTTATATCAACATTTA

EU092998_Bu951 -----------------------------------------------------------------------------------------------------------------------------------------------------------------------------------------------------------TTTAATATTAGGAGCCCCAGATATAGCTTTTCCTCGAATAAATAATATAAGATTTTGATTACTACCCCCCTCATTAACTTTATTAATTTCTAGAAGAATTGTAGAAAATGGAGCAGGAACAGGATGAACAGTTTATCCCCCTTTATCATCTAATATCGCTCATAGTGGTAGTTCAGTTGATTTAGCTATTTTTTCTTTACATTTAGCAGGAATTTCATCAATCTTAGGAGCTATTAATTTTATTACAACTATTATTAATATACGAATTAACCATATATCATTTGATCAAATACCTCTCTTTGTATGAGCAGTAGGAATTACTGCTTTACTTTTATTATTATCTTTACCTGTATTAGCTGGTGCTATTACTATATTATTAACAGATCGAAATCTTAATACTTCATTTTTTGATCCTGCAGGAGGTGGAGATCCTATTTTATATCAACATTTA

EU092997_Ru940 -----------------------------------------------------------------------------------------------------------------------------------------------------------------------------------------------------------TTTAATATTAGGAGCCCCAGATATAGCTTTTCCTCGAATAAATAATATAAGATTTTGATTACTACCCCCCTCATTAACTTTATTAATTTCTAGAAGAATTGTAGAAAATGGAGCAGGAACAGGATGAACAGTTTATCCCCCTTTATCATCTAATATCGCTCATAGAGGTAGTTCAGTTGATTTAGCTATTTTTTCTTTACATTTAGCAGGAATTTCATCAATCTTAGGAGCTATTAATTTTATTACAACTATTATTAATATACGAATTAACCATATATCATTTGATCAAATACCTCTCTTTGTATGAGCAGTAGGAATTACTGCTTTACTTTTATTATTATCTCTACCTGTATTAGCTGGTGCTATTACTATATTATTAACAGATCGAAATCTTAATACTTCATTTTTTGATCCTGCAGGAGGTGGGGATCCTATTTTATATCAACATTTA

EU092996_Sp924_Fr -----------------------------------------------------------------------------------------------------------------------------------------------------------------------------------------------------------TTTAATATTAGGAGCCCCAGATATAGCTTTCCCCCGAATAAATAATATAAGATTTTGATTACTACCCCCTTCATTAACCTTATTAATTTCTAGAAGAATTGTAGAAAATGGAGCAGGAACTGGATGAACAGTTTACCCCCCTTTATCATCCAATATTGCTCATAGAGGAAGTTCAGTTGATTTAGCTATTTTTTCCCTACATTTAGCAGGAATTTCATCAATCTTAGGAGCTATTAATTTTATTACAACTATTATTAATATACGAATTAATCATATATCATTCGATCAAATACCTCTTTTTGTGTGAGCAGTAGGAATTACTGCTTTACTTTTATTATTATCCTTACCTGTATTAGCTGGTGCTATTACTATATTATTAACAGATCGAAATCTTAATACTTCATTTTTTGATCCAGCAGGAGGTGGTGATCCTATTTTATATCAACATTTA

EU092995_Sp923 -----------------------------------------------------------------------------------------------------------------------------------------------------------------------------------------------------------TTTAATATTAGGAGCCCCAGATATAGCTTTCCCCCGAATAAATAATATAAGATTTTGATTACTACCCCCTTCATTAACCTTATTAATTTCTAGAAGAATTGTAGAAAATGGAGCAGGAACTGGATGAACAGTTTATCCCCCTTTATCATCCAATATTGCTCATAGAGGAAGTTCAGTTGATTTAGCTATTTTTTCCCTACATTTAGCGGGAATTTCATCAATCTTAGGAGCTATTAATTTTATTACAACTATTATTAATATACGAATTAATCATATATCATTCGATCAAATACCTCTTTTTGTGTGAGCAGTAGGAATTACTGCTTTACTTTTATTATTATCCTTACCTGTATTAGCTGGTGCTATTACTATATTATTAACGGATCGAAATCTTAATACTTCATTTTTTGATCCAGCAGGAGGTGGTGATCCTATTTTATATCAACATTTA

EU092994_Sp921 -----------------------------------------------------------------------------------------------------------------------------------------------------------------------------------------------------------TTTAATATTAGGAGCCCCAGATATAGCTTTCCCCCGAATAAATAATATAAGATTTTGATTACTACCCCCTTCATTAACCTTATTAATTTCTAGAAGAATTGTAGAAAATGGAGCAGGAACTGGATGAACAGTTTACCCCCCTTTATCATCCAATATTGCTCATAGAGGAAGTTCAGTTGATTTAGCTATTTTTTCCCTACATTTAGCAGGAATTTCATCAATCTTAGGAGCTATTAATTTTATTACAACTATTATTAATATACGAATTAATCATATATCATTCGATCAAATACCTCTTTTTGTGTGAGCAGTAGGAATTACTGCTTTACTTTTATTATTATCCTTACCTGTATTAGCTGGTGCTATTACTATATTATTAACGGATCGAAATCTTAATACTTCATTTTTTGATCCAGCAGGAGGTGGTGATCCTATTTTATATCAACATTTA

EU092993_Sp917 -----------------------------------------------------------------------------------------------------------------------------------------------------------------------------------------------------------TTTAATATTAGGAGCCCCAGATATAGCTTTCCCCCGAATAAATAATATAAGATTTTGATTACTACCCCCTTCATTAACCTTATTAATTTCTAGAAGAATTGTAGAAAATGGAGCAGGAACTGGATGAACAGTTTATCCCCCTTTATCATCCAATATTGCTCATAGAGGAAGTTCAGTTGATTTAGCTATTTTTTCCCTACATTTAGCAGGAATTTCATCAATCTTAGGAGCTATTAATTTTATTACAACTATTATTAATATACGAATTAATCATATATCATTCGATCAAATACCTCTTTTTGTGTGAGCAGTAGGAATTACTGCTTTACTTTTATTATTATCCTTACCTGTATTAGCTGGTGCTATTACTATATTATTAACAGATCGAAATCTTAATACTTCATTTTTTGATCCAGCAGGAGGTGGTGATCCTATTTTATATCAACATTTA

EU092992_Sp916 -----------------------------------------------------------------------------------------------------------------------------------------------------------------------------------------------------------TTTAATATTAGGAGCCCCAGATATAGCTTTCCCCCGAATAAATAATATAAGATTTTGATTACTACCCCCTTCATTAACCTTATTAATTTCTAGAAGAATTGTAGAAAATGGAGCAGGAACTGGATGAACAGTTTACCCCCCTTTATCATCCAATATTGCTCATAGAGGAAGTTCAGTTGATTTAGCTATTTTTTCCCTACATTTAGCAGGAATTTCATCAATCTTAGGAGCTATTAATTTTATTACAACTATTATTAATATACGAATTAATCATATATCATTCGATCAAATACCTCTTTTTGTGTGAGCAGTAGGAATTACTGCTTTACTTTTATTATTATCCTTACCTGTATTAGCTGGTGCTATTACTATATTATTAACAGATCGAAATATTAATACTTCATTTTTTGATCCAGCAGGAGGTGGTGATCCTATTTTATATCAACATTTA

EU092991_Fr913 -----------------------------------------------------------------------------------------------------------------------------------------------------------------------------------------------------------TTTAATATTAGGAGCCCCAGATATAGCTTTCCCCCGAATAAATAATATAAGATTTTGATTACTACCCCCTTCATTAACCTTATTAATTTCTAGAAGAATTGTAGAAAATGGAGCAGGAACTGGATGAACAATTTACCCCCCTTTATCATCCAATATTGCTCATAGAGGAAGTTCAGTTGATTTAGCTATTTTTTCCCTACATTTAGCAGGAATTTCATCAATCTTAGGAGCTATTAATTTTATTACAACTATTATTAATATACGAATTAATCATATATCATTCGATCAAATACCTCTTTTTGTGTGAGCAGTAGGAATTACTGCTTTACTTTTATTATTATCCTTACCTGTATTAGCTGGTGCTATTACTATATTATTAACAGATCGAAATCTTAATACTTCATTTTTTGATCCAGCAGGAGGTGGTGATCCTATTTTATATCAACATTTA

EU092990_Fr911 -----------------------------------------------------------------------------------------------------------------------------------------------------------------------------------------------------------TTTAATATTAGGAGCCCCAGATATAGCTTTCCCCCGAATAAATAATATAAGATTTTGATTACTACCCCCTTCATTAACCTTATTAATTTCTAGAAGAATTGTAGAAAATGGAGCAGGAACTGGATGAACAGTTTACCCCCCTTTATCATCTAATATTGCTCATAGAGGAAGTTCAGTTGATTTAGCTATTTTTTCCTTACATTTAGCAGGAATTTCATCAATCTTAGGAGCTATTAATTTTATTACAACTATTATTAATATACGAATTAATCATATATCATTCGATCAAATACCTCTTTTTGTATGAGCAGTAGGAATTACTGCTTTACTTTTATTATTATCATTACCTGTATTAGCTGGTGCTATTACTATATTATTAACAGATCGAAATCTTAATACTTCATTTTTTGATCCAGCAGGGGGTGGTGATCCTATTTTATATCAACATTTA

EU092988_It639 -----------------------------------------------------------------------------------------------------------------------------------------------------------------------------------------------------------TTTAATATTAGGAGCCCCAGATATAGCTTTCCCCCGAATAAATAATATAAGATTTTGATTACTACCCCCTTCATTAACCTTATTAATTTCTAGAAGAATTGTAGAAAATGGAGCAGGAACTGGATGAACAGTTTACCCCCCTTTATCATCTAATATTGCTCATAGAGGAAGTTCAGTTGATTTAGCTATTTTTTCCCTACATTTAGCGGGAATTTCATCAATCTTAGGAGCTATTAATTTTATTACAACTATTATTAATATACGAATTAATCATATATCATTTGATCAAATACCTCTTTTTGTATGAGCAGTAGGAATTACTGCTTTACTTTTATTATTATCCTTACCTGTATTAGCTGGTGCTATTACTATATTATTAACAGATCGAAATCTTAATACTTCATTTTTTGATCCAGCAGGAGGTGGTGATCCTATTTTATATCAACATTTA

EU092987_Fr528 -----------------------------------------------------------------------------------------------------------------------------------------------------------------------------------------------------------TTTAATATTAGGAGCCCCAGATATAGCTTTCCCCCGAATAAATAATATAAGATTTTGATTACTACCCCCTTCATTAACCTTATTAATTTCTAGAAGAATTGTAGAAAATGGAGCAGGAACTGGATGAACAGTTTACCCCCCTTTATCATCTAATATTGCTCATAGAGGAAGTTCAGTTGATTTAGCTATTTTTTCCCTACATTTAGCGGGAATTTCATCAATCTTAGGAGCTATTAATTTTATTACAACTATTATTAATATACGAATTAATCATATATCATTCGATCAAATACCTCTTTTTGTATGAGCAGTAGGAATTACTGCTTTACTTTTATTATTATCCTTACCTGTATTAGCTGGTGCTATTACTATATTATTAACAGATCGAAATCTTAATACTTCATTTTTTGATCCAGCAGGAGGTGGTGATCCTATTTTATATCAACATTTA

EU092985_Fr525 -----------------------------------------------------------------------------------------------------------------------------------------------------------------------------------------------------------TTTAATATTAGGAGCCCCAGATATAGCTTTCCCCCGAATAAATAATATAAGATTTTGATTACTACCCCCTTCATTAACCTTATTAATTTCTAGAAGAATTGTAGAAAATGGAGCAGGAACTGGATGAACAGTTTACCCCCCTTTATCATCTAATATTGCTCATAGAGGAAGTTCAGTTGATTTAGCTATTTTTTCCTTACATTTAGCAGGAATTTCATCAATCTTAGGAGCTATTAATTTTATTACAACTATTATTAATATACGAATTAATCATATATCATTCGATCAAATACCTCTTTTTGTATGAGCAGTAGGAATTACTGCTTTACTTTTATTATTATCATTACCTGTATTAGCTGGTGCTATTACTATATTATTAACAGATCGAAATCTTAATACTTCATTTTTTGATCCAGCAGGAGGTGGTGATCCTATTTTATATCAACATTTA

EU092984_Fr522 -----------------------------------------------------------------------------------------------------------------------------------------------------------------------------------------------------------TTTAATATTAGGAGCCCCAGATATAGCTTTCCCCCGAATAAATAATATAAGATTTTGATTACTACCCCCTTCATTAACCTTATTAATTTCTAGAAGAATTGTAGAAAATGGAGCAGGAACTGGATGAACAGTTTACCCCCCTTTATCATCTAATATTGCTCATAGAGGAAGTTCAGTTGATTTAGCTATTTTTTCCTTACATTTAGCAGGAATTTCATCAATCTTAGGAGCTATTAATTTTATTACAACTATTATTAATATACGAATTAATCATATATCATTCGATCAAATACCTCTTTTTGTATGAGCAGTAGGAATTACTGCTTTACTCTTATTATTATCATTACCTGTATTAGCTGGTGCTATTACTATATTATTAACAGATCGAAATCTTAATACTTCATTTTTTGATCCAGCAGGGGGTGGTGATCCTATTTTATATCAACATTTA

EU092983_Ch765 -----------------------------------------------------------------------------------------------------------------------------------------------------------------------------------------------------------TTTAATATTAGGAGCCCCAGATATAGCTTTCCCCCGAATAAATAATATAAGATTTTGATTACTACCCCCTTCATTAACCTTATTAATTTCTAGAAGAATTGTAGAAAATGGAGCAGGAACTGGATGAACAGTTTACCCCCCTTTATCATCTAATATTGCTCATAGAGGAAGTTCAGTTGATTTAGCTATTTTTTCCCTACATTTAGCAGGAATTTCATCAATCTTAGGAGCTATTAATTTTATTACAACTATTATTAATATACGAATTAATCATATATCATTCGATCAAATACCTCTTTTTGTATGAGCAGTAGGAATTACTGCTTTACTTTTATTATTATCCTTACCTGTATTAGCTGGTGCTATTACTATATTATTAACAGATCGAAATCTTAATACTTCATTTTTTGATCCAGCAGGAGGTGGTGATCCTATTTTATATCAACATTTA

EU092982_Pl653_Slova_Ukr -----------------------------------------------------------------------------------------------------------------------------------------------------------------------------------------------------------TTTAATATTAGGAGCCCCAGATATAGCTTTTCCTCGAATAAATAATATAAGATTTTGATTACTACCCCCCTCATTAACTTTATTAATTTCTAGAAGAATTGTAGAAAATGGAGCAGGAACAGGATGAACAATTTATCCCCCTTTATCATCTAATATCGCTCATAGAGGTAGTTCAGTTGATTTAGCTATTTTTTCTTTACATTTAGCAGGAATTTCATCAATCTTAGGAGCTATTAATTTTATTACAACTATTATTAATATACGAATTAACCATATATCATTTGATCAAATACCTCTCTTTGTATGAGCAGTAGGAATTACTGCTTTACTTTTATTATTATCTTTACCTGTATTAGCTGGTGCTATTACTATATTATTAACAGATCGAAATCTTAATACTTCATTTTTTGATCCTGCAGGAGGTGGAGATCCTATTTTATATCAACATTTA

EU092981_At626 -----------------------------------------------------------------------------------------------------------------------------------------------------------------------------------------------------------TTTAATATTAGGAGCCCCAGATATAGCTTTTCCTCGAATAAATAATATAAGATTTTGATTACTACCCCCCTCATTAACTTTATTAATTTCTAGAAGAATTGTAGAAAATGGAGCAGGAACAGGATGAACAGTTTATCCCCCTTTATCATCTAATATCGCTCATAGAGGTAGTTCAGTTGATTTAGCTATTTTTTCTTTACATTTAGCAGGAATTTCATCAATCTTAGGAGCTATTAATTTTATTACAACTATTATTAATATACGAATTAACCATATATCATTTGATCAAATACCTCTCTTTGTATGAGCAGTAGGAATTACTGCTTTACTTTTATTATTATCTTTACCTGTGTTAGCTGGTGCTATTACTATATTATTAACAGATCGAAATCTTAATACTTCATTTTTTGATCCTGCAGGAGGTGGAGATCCTATTTTATATCAACATTTA

EU092980_At622 -----------------------------------------------------------------------------------------------------------------------------------------------------------------------------------------------------------TTTAATATTAGGAGCCCCAGATATAGCTTTTCCTCGAATAAATAATATAAGATTTTGATTACTACCCCCCTCATTAACTTTATTAATTTCTAGAAGAATTGTAGAAAATGGAGCAGGAACAGGATGAACAGTTTATCCCCCTTTATCATCTAATATTGCTCATAGAGGTAGTTCAGTTGATTTAGCTATTTTTTCTTTACATTTAGCAGGAATTTCATCAATCTTAGGAGCTATTAATTTTATTACAACTATTATTAATATACGAATTAACCATATATCATTTGATCAAATACCTCTCTTTGTATGAGCAGTAGGAATTACTGCTTTACTTTTATTACTATCTTTACCTGTATTAGCTGGTGCTATTACTATATTATTAACAGATCGAAATCTTAATACTTCATTTTTTGATCCTGCAGGAGGTGGAGATCCTATTTTATATCAACATTTA

EU092978_At618_At_Slo -----------------------------------------------------------------------------------------------------------------------------------------------------------------------------------------------------------TTTAATATTAGGAGCCCCAGATATAGCTTTTCCTCGAATAAATAATATAAGATTTTGATTACTACCCCCCTCATTAACTTTATTAATTTCTAGAAGAATTGTAGAAAATGGGGCAGGAACAGGATGAACAGTTTATCCCCCTTTATCATCTAATATCGCTCATAGAGGTAGTTCAGTTGATTTAGCTATTTTTTCTTTACATTTAGCAGGAATTTCATCAATCTTAGGAGCTATTAATTTTATTACAACTATTATTAATATACGAATTAACCATATATCATTTGATCAAATACCTCTCTTTGTATGAGCAGTAGGAATTACTGCTTTACTTTTATTATTATCTTTACCTGTATTAGCTGGTGCTATTACTATATTATTAACAGATCGAAATCTTAATACTTCATTTTTTGATCCTGCAGGAGGTGGAGATCCTATTTTATATCAACATTTA

EU092977_At606_At_Cz_D_Fi_Hu_Po_Slova -----------------------------------------------------------------------------------------------------------------------------------------------------------------------------------------------------------TTTAATATTAGGAGCCCCAGATATAGCTTTTCCTCGAATAAATAATATAAGATTTTGATTACTACCCCCCTCATTAACTTTATTAATTTCTAGAAGAATTGTAGAAAATGGAGCAGGAACAGGATGAACAGTTTATCCCCCTTTATCATCTAATATTGCTCATAGAGGTAGTTCAGTTGATTTAGCTATTTTTTCTTTACATTTAGCAGGAATTTCATCAATCTTAGGAGCTATTAATTTTATTACAACTATTATTAATATACGAATTAACCATATATCATTTGATCAAATACCTCTCTTTGTATGAGCAGTAGGAATTACTGCTTTACTTTTATTATTATCTTTACCTGTATTAGCTGGTGCTATTACTATATTATTAACAGATCGAAATCTTAATACTTCATTTTTTGATCCTGCAGGAGGTGGAGATCCTATTTTATATCAACATTTA

EU092976_At602 -----------------------------------------------------------------------------------------------------------------------------------------------------------------------------------------------------------TTTAATATTAGGAGCCCCAGATATAGCTTTTCCTCGAATAAATAATATAAGATTTTGATTACTACCCCCCTCATTAACTTTATTAATTTCTAGAAGAATTGTAGAAAATGGAGCAGGAACAGGATGAACAGTTTATCCCCCTTTATCATCTAATATTGCTCATAGAGGTAGTTCAGTTGATTTAGCTATTTTTTCTTTACATTTAGTAGGAATTTCATCAATCTTAGGAGCTATTAATTTTATTACAACTATTATTAATATACGAATTAACCATATATCATTTGATCAAATACCTCTCTTTGTATGAGCAGTAGGAATTACTGCTTTACTTTTATTATTATCTTTACCTGTATTAGCTGGTGCTATTACTATATTATTAACAGATCGAAATCTTAATACTTCATTTTTTGATCCTGCAGGAGGTGGAGATCCTATTTTATATCAACATTTA

EU092975_D757 -----------------------------------------------------------------------------------------------------------------------------------------------------------------------------------------------------------TTTAATATTAGGAGCCCCAGATATAGCTTTTCCTCGAATAAATAATATAAGATTTTGATTACTACCCCCCTCATTAACTTTATTAATTTCTAGAAGAATTGTAGAAAATGGAGCAGGAACAGGATGAACAGTTTATCTTCCTTTATCATCTAATATTGCTCATAGAGGTAGTTCAGTTGATTTAGCTATTTTTTCTTTACATTTAGCAGGAATTTCATCAATCTTAGGAGCTATTAATTTTATTACAACTATTATTAATATACGAATTAACCATATATCATTTGATCAAATACCTCTCTTTGTATGAGCAGTAGGAATTACTGCTTTACTTTTATTATTATCTTTACCTGTATTAGCTGGTGCTATTACTATATTATTAACAGATCGAAATCTTAATACTTCATTTTTTGATCCTGCAGGAGGTGGAGATCCTATTTTATATCAACATTTA

EU092974_D756 -----------------------------------------------------------------------------------------------------------------------------------------------------------------------------------------------------------TTTAATATTAGGAGCCCCAGATATAGCTTTTCCTCGAATAAATAATATAAGATTTTGATTACTACCCCCCTCATTAACTTTATTAATTTCTAGAAGAATTGTAGAAAATGGAGCAGGAACAGGATGAACAATTTATCCCCCTTTATCATCTAATATTGCTCATAGAGGTAGTTCAGTTGATTTAGCTATTTTTTCTTTACATTTAGCAGGAATTTCATCAATCTTAGGAGCTATTAATTTTATTACAACTATTATTAATATACGAATTAACCATATATCATTTGATCAAATACCTCTCTTTGTATGAGCAGTAGGAATTACTGCTTTACTTTTATTATTATCTTTACCTGTATTAGCTGGTGCTATTACTATATTATTAACAGATCGAAATCTTAATACTTCATTTTTTGATCCTGCAGGAGGTGGAGATCCTATTTTATATCAACATTTA

EU092973_D744 -----------------------------------------------------------------------------------------------------------------------------------------------------------------------------------------------------------TTTAATATTAGGAGCCCCAGATATAGCTTTTCCTCGAATAAATAATATAAGATTTTGATTACTACCCCCCTCATTAACTTTATTAATTTCTAGAAGAATTGTAGAAAATGGAGCAGGAACAGGATGAACGGTTTATCCCCCTTTATCATCTAATATTGCTCATAGAGGTAGTTCAGTTGATTTAGCTATTTTTTCTTTACATTTAGCAGGAATTTCATCAATCTTAGGAGCTATTAATTTTATTACAACTATTATTAATATACGAATTAACCATATATCATTTGATCAAATACCTCTCTTTGTATGAGCAGTAGGAATTACTGCTTTACTTTTATTATTATCTTTACCTGTATTAGCTGGTGCTATTACTATATTATTAACAGATCGAAATCTTAATACTTCATTTTTTGATCCTGCAGGAGGTGGAGATCCTATTTTATATCAACATTTA

EU092971_Hu697_Bu_Hu -----------------------------------------------------------------------------------------------------------------------------------------------------------------------------------------------------------TTTAATATTAGGAGCCCCAGATATAGCTTTTCCTCGAATAAATAATATAAGATTTTGATTACTACCCCCCTCATTAACTTTATTAATTTCTAGAAGAATTGTAGAAAATGGAGCAGGAACAGGATGAACAGTTTATCCCCCTTTATCATCTAATATCGCTCATAGAGGTAGTTCAGTTGATTTAGCTATTTTTTCTTTACATTTAGCAGGAATTTCATCAATCTTAGGAGCTATTAATTTTATTACAACTATTATTAATATACGAATTAACCATATATCATTTGATCAAATACCTCTCTTTGTATGAGCAGTAGGAATTACTGCTTTACTTTTATTATTATCTTTACCTGTATTAGCTGGTGCTATTACTATATTATTAACAGATCGAAATCTTAATACTTCATTTTTTGATCCTGCAGGAGGTGGAGATCCTATTTTATATCAACATTTA

EU092969_Bu775 -----------------------------------------------------------------------------------------------------------------------------------------------------------------------------------------------------------TTTAATATTAGGAGCCCCAGATATAGCTTTTCCTCGAATAAATAATATAAGATTTTGATTACTACCCCCCTCATTAACTTTATTAATTTCTAGAAGAATTGTAGAAAATGGAGCAGGAACAGGATGAACAATTTATCCCCCTTTATCATCTAATATCGCTCACAGAGGTAGTTCAGTTGATTTAGCTATTTTTTCTTTACATTTAGCAGGAATTTCATCAATCTTAGGAGCTATTAATTTTATTACAACTATTATTAATATACGAATTAACCATATATCATTTGATCAAATACCTCTCTTTGTATGAGCAGTAGGAATTACTGCTTTACTTTTATTATTATCTTTACCTGTATTAGCTGGTGCTATTACTATATTATTAACAGATCGAAATCTTAATACTTCATTTTTTGATCCTGCAGGAGGTGGAGATCCTATTTTATATCAACATTTA

EU092968_Bu772 -----------------------------------------------------------------------------------------------------------------------------------------------------------------------------------------------------------TTTAATATTAGGAGCCCCAGATATAGCTTTTCCTCGAATAAATAATATAAGATTTTGATTACTACCCCCCTCATTAACTTTATTAATTTCTAGAAGAATTGTAGAAAATGGAGCAGGAACAGGATGAACAGTTTATCCCCCTTTATCATCTAATATCGCTCATAGAGGTAGTTCAGTTGATTTAGCTATTTTTTCTTTACATTTAGCAGGAATTTCATCAATCTTAGGAGCTATTAATTTTATTACAACTATTATTAATATACGAATTAACCATATATCATTTGATCAAATACCTCTCTTTGTATGAGCAGTAGGAATTACTGCTTTACTTTTATTATTATCTCTACCTGTATTAGCTGGTGCTATTACTATATTATTAACAGATCGAAATCTTAATACTTCATTTTTTGATCCTGCAGGAGGTGGAGATCCTATTTTATATCAACATTTA

EU093003_D982 -----------------------------------------------------------------------------------------------------------------------------------------------------------------------------------------------------------TTTAATATTAGGAGCCCCAGATATAGCTTTTCCTCGAATAAATAATATAAGATTTTGATTACTACCCCCCTCATTAACTTTATTAATTTCTAGAAGAATTGTAGAAAATGGAGCAGGAACAGGATGAACAGTTTATCCCCCTTTATCATCTAATATTGCTCATAGAGGTAGTTCAGTTGATTTAGCTATTTTTTCTTTACATTTAGCAGGAATTTCATCAATCTTAGGAGCTATTAATTTTATTACAACTATTATTAATATACGAATTAACCATATATCATTTGATCAAATACCTCTCTTTGTATGGGCAGTAGGAATTACTGCTTTACTTTTATTATTATCTTTACCTGTATTAGCTGGTGCTATTACTATATTATTAACAGATCGAAATCTTAATACTTCATTTTTTGATCCTGCAGGAGGTGGAGATCCTATTTTATATCAACATTTA

DQ407769_UP_100_F ACATTATATTTTATTTTTGGTATTTGAGCAGGTATAGTAGGAACCTCTTTAAGATTATTAATTCGTACTGAATTAGGTAATCCTGGATCTTTAATTGGAGATGATCAAATTTATAACACTATTGTAACAGCTCATGCTTTTATTATAATTTTTTTTATAGTTATACCAATTATAATTGGAGGATTTGGAAATTGATTAATTCCTTTAATATTAGGAGCCCCAGATATAGCTTTCCCCCGAATAAATAATATAAGATTTTGATTACTACCCCCTTCATTAACCTTATTAATTTCTAGAAGAATTGTAGAAAATGGAGCAGGAACTGGATGAACAGTTTACCCCCCTTTATCATCTAATATTGCTCATAGAGGAAGTTCAGTTGATTTAGCTATTTTTTCCTTACATTTAGCAGGAATTTCATCAATCTTAGGAGCTATTAATTTTATTACAACTATTATTAATATACGAATTAATCATATATCATTCGATCAAATACCTCTTTTTGTATGAGCAGTAGGAATTACTGCTTTACTCTTATTATTATCATTACCTGTATTAGCTGGTGCTATTACTATATTATTAACAGATCGAAATCTTAATACTTCATTTTTTGATCCAGCAGGGGGTGGTGA----------------------

AM231426_W336_parvisi_Gre ACACTATATTTTATTTTTGGTATTTGAGCAGGTATAGTAGGAACCTCTTTAAGATTATTAATTCGTACTGAATTAGGTAATCCTGGATCTTTAATTGGAGATGATCAAATTTATAATACTATTGTAACAGCTCATGCTTTTATTATAATTTTTTTTATAGTTATACCAATTATAATTGGAGGATTTGGAAATTGATTAATTCCTTTAATATTAGGAGCCCCAGATATAGCTTTTCCTCGAATAAATAATATAAGATTTTGATTACTACCCCCCTCATTAACTTTATTAATTTCTAGAAGAATTG????????????????????GGATGAACAGTTTATCCCCCTTTATCATCTAATATCGCTCATAGAGGTAGTTCAGTTGATTTAGCTATTTTTTCTTTACATTTAGCAGGAATTTCATCAATCTTAGGGGCTATTAATTTTATTACAACTATTATTAATATACGAATTAACCATATATCATTTGATCAAATACCTCTCTTTGTATGAGCAGTAGGAATTACTGCTTTACTTTTATTATTATCTTTACCTGTATTAGCTGGTGCTATTACTATATTATTAACAGATCGAAATCTTAATACTTCATTTTTTGATCYTGCAGGAGGTGGAGATCCTATTTTATATCAA------

AM231425_W333_angorae_Tur ACACTATATTTTATTTTTGGTATTTGAGCAGGTATAGTAGGAACCTCTTTAAGATTATTAATTCGTACTGAATTAGGTAATCCTGGATCTTTAATTGGGGATGATCAAATTTATAATACTATTGTAACAGCTCATGCTTTTATTATAATTTTTTTTATAGTTATACCAATTATAATTGGAGGATTTGGAAATTGATTAATTCCTTTAATATTAGGAGCCCCAGATATAGCTTTTCCTCGAATAAATAATATAAGATTTTGATTATTACCCCCCTCATTAACTTTATTAATTTCTAGAAGAATTG????????????????????GGATGAACAGTTTATCCCCCTTTATCATCTAATATTTCTCATAGAGGTAGTTCAGTTGATTTAGCTATTTTTTCTTTACATTTAGCAGGAATTTCATCAATCTTAGGAGCTATTAATTTTATTACAACTATTATTAATATACGAATTAATCATATATCATTTGATCAAATACCCCTTTTTGTATGGGCAGTAGGAATTACTGCTTTACTTTTATTATTATCTTTACCTGTATTAGCTGGTGCTWTTACTATATTATTAACAGATCGAAATCTTAATACTTCATTTTTCGATCCCGCAGGAGGTGGGGATCCTATTTTATATCAA------

AM231424_W331_angorae_Tur_Ankara ACACTATATTTTATTTTTGGTATTTGAGCAGGTATAGTAGGAACCTCTTTAAGATTATTAATTCGTACTGAATTAGGTAATCCTGGATCTTTAATTGGAGATGATCAAATTTATAATACTATTGTAACAGCTCATGCTTTTATTATAATTTTTTTTATAGTTATACCAATTATAATTGGAGGATTTGGAAATTGATTAATTCCTTTAATATTAGGAGCCCCAGATATAGCTTTTCCTCGAATAAATAATATAAGATTTTGATTATTACCCCCCTCATTAACTTTATTAATTTCTAGAAGAATTGTA??????????????????GGATGAACAGTTTATCCCCCTTTATCATCTAATATCGCTCATAGAGGTAGCTCAGTTGATTTAGCTATTTTTTCTTTACATTTAGCAGGAATTTCATCAATCTTAGGAGCTATTAATTTTATTACAACTATTATTAATATACGAATTAACCATATATCATTTGATCAAATACCTCTCTTTGTATGAGCAGTAGGAATTACCGCTTTACTTTTATTATTATCTTTACCTGTATTAGCTGGTGCTATTACTATATTATTAACAGATCGAAATCTTAATACTTCATTTTTTGATCCTGCAGGAGGTGGAGATCCTATTTTATATCAA------

AM231423_W329_gigantea_Uzb_Chatkal ACACTATATTTTATTTTTGGTATTTGAGCAGGTATAGTAGGAACCTCTTTAAGATTATTAATTCGTACTGAATTAGGTAATCCTGGATCTTTAATTGGAGATGATCAAATTTATAATACTATTGTAACAGCTCATGCTTTTATTATAATTTTTTTTATAGTTATACCAATTATAATTGGAGGATTTGGAAATTGATTAATTCCTTTAATATTAGGAGCCCCAGATATAGCTTTTCCTCGAATAAATAATATAAGATTTTGATTATTACCCCCTTCATTAACTTTATTAATTTCTAGAAGAATTG????????????????????GGATGAACAGTTTATCCCCCTTTATCATCTAATATCGCTCATAGAGGTAGTTCAGTTGATTTAGCTATTTTTTCTTTACATTTAGCAGGAATTTCATCAATCTTAGGAGCTATTAATTTTATTACAACTATTATTAATATACGAATTAATCATATATCATTTGATCAAATACCTCTCTTTGTATGAGCAGTAGGAATTACTGCTTTACTTTTATTACTATCTTTACCTGTATTAGCTGGTGCTATTACTATATTATTAACAGATCGAAATCTTAATACTTCATTTTTTGATCCTGCAGGAGGTGGAGATCCTATTTTATATCAA------

AM231422_W330_orientalis_Zailijskiy ACACTATATTTTATTTTTGGTATTTGAGCAGGTATAGTAGGAACCTCTTTAAGATTATTAATTCGTACTGAATTAGGTAATCCTGGATCTTTAATTGGAGATGATCAAATTTATAATACTATTGTAACAGCTCATGCTTTTATTATAATTTTTTTTATAGTTATACCAATTATAATTGGAGGATTTGGAAATTGATTAATTCCTTTAATATTAGGGGCCCCAGATATAGCTTTTCCTCGAATAAATAATATAAGATTTTGATTATTACCCCCTTCATTAACTTTATTAATTTCTAGAAGAATTGTAGAAAATGGAGCAGGAACAGGATGAACAGTTTATCCCCCTTTATCATCTAATATCGCTCATAGAGGTAGTTCAGTTGATTTAGCTATTTTTTCTTTACATTTAGCGGGAATTTCATCAATCTTAGGAGCTATTAATTTTATTACAACTATTATTAATATACGAATTAATCATATATCATTTGATCAAATACCTCTCTTTGTATGAGCAGTAGGAATTACTGCTTTACTTTTATTACTATCTTTACCTGTATTAGCTGGTGCTATTACTATATTATTAACAGATCGAAATCTTAATACTTCATTTTTTGATCCTGCAGGAGGTGGAGATCCTATTTTATATCAA------

AM231421_W292_ochracea_Tadj_Zeravsh_ ACACTATATTTTATTTTTGGTATTTGAGCAGGTATAGTAGGAACCTCTTTAAGATTATTAATTCGTACTGAATTAGGTAATCCTGGATCTTTAATTGGAGATGATCAAATTTATAATACTATTGTAACAGCTCATGCTTTTATTATAATTTTTTTCATAGTTATACCAATTATAATTGGAGGATTTGGAAATTGATTAATTCCTTTAATATTAGGAGCCCCAGATATAGCTTTTCCTCGAATAAATAATATAAGATTTTGATTACTACCCCCTTCATTAACTTTATTAATTTCCAGAAGAATTGTAGAAAATGGAGCAGGAACAGGATGAACAGTTTATCCCCCTTTATCATCTAATATCGCTCATAGAGGTAGTTCAGTTGATTTAGCTATTTTTTCTTTACATTTAGCAGGAATTTCATCAATTTTAGGAGCTATTAATTTCATTACAACTATTATTAATATACGAATTAACCATATATCATTTGATCAAATACCCCTCTTTGTATGAGCAGTAGGAATTACTGCTTTACTTTTATTATTATCTTTACCTGTATTAGCTGGTGCTATTACTATATTATTAACAGATCGAAATCTTAATACTTCATTTTTTGATCCTGCAGG??GTGGAGATCCTATTTTATATCAA------

AM231420_W280_farsica_Iran_Fars ACACTATATTTTATTTTCGGTATTTGAGCAGGTATAGTAGGAACCTCTTTAAGATTATTAATTCGTACTGAATTAGGTAATCCTGGATCTTTAATTGGAGATGATCAAATTTATAATACTATTGTAACAGCTCATGCTTTTATTATAATCTTTTTTATAGTTATACCAATTATAATTGGAGGATTTGGAAATTGATTAATTCCTTTAATATTAGGAGCTCCAGATATAGCTTTCCCCCGAATAAATAATATAAGATTTTGATTACTCCCCCCCTCATTAACTTTATTAATTTCTAGAAGAATTGTAGAAAATGGAGCAGGAACAGGATGAACAGTTTACCCCCCTTTATCATCTAATATTGCCCACAGAGGTAGTTCAGTTGATTTAGCTATTTTTTCTTTACATTTAGCAGGAATTTCATCAATTTTAGGAGCTATTAATTTTATTACAACTATTATTAATATACGAATTAATTATATATCATTTGATCAAATACCTCTTTTTGTATGAGCAGTAGGAATTACAGCATTACTTTTATTATTATCTTTACCTGTATTAGCTGGTGCTATTACTATATTATTAACAGATCGAAATCTTAACACTTCATTTTTTGATCCTGCA????GTGGGGATCCTATTTTATATCAA------

AM231419_W311_pseudonubilosus_Iran_Urmia ACACTATATTTTATTTTCGGTATTTGAGCGGGTATAGTAGGAACCTCTTTAAGATTATTAATTCGTACTGAATTAGGTAATCCTGGATCTTTAATTGGAGATGATCAAATTTATAACACTATTGTAACAGCTCATGCTTTTATTATAATTTTTTTTATAGTTATACCAATTATAATTGGAGGATTTGGAAATTGATTAATTCCTTTAATATTAGGAGCTCCAGATATAGCTTTTCCTCGAATAAATAATATAAGATTTTGATTACTCCCCCCCTCATTAACTTTATTAATTTCTAGAAGAATTGTAGAAAATGGAGCAGGAACAGGATGAACAATTTATCCCCCTTTATCATCTAATATTGCTCATAGAGGTAGTTCAGTTGATTTAGCTATTTTTTCTTTACATTTAGCAGGAATTTCATCAATCTTAGGAGCTATTAATTTTATTACAACTATTATTAACATACGAATTAATCATATATCATTTGATCAAATACCTCTTTTTGTATGAGCAGTAGGAATTACTGCATTACTTTTATTATTATCTTTACCTGTATTAGCTGGTGCTATTACTATATTATTAACAGATCGAAATCTTAATACTTCATTTTTTGATCCTGCAGGA?GTGGAGATCCTATTTTATATCAA------

AM231418_W335_sheljuzhkoi_Tur_Adana ACACTATATTTTATTTTTGGTATTTGAGCAGGTATAGTAGGAACCTCTTTAAGATTATTAATTCGTACTGAATTAGGTAATCCTGGATCTTTAATTAGAGATGATCAAATTTATAATACTATTGTAACAGCTCATGCTTTTATTATAATTTTTTTTATAGTTATACCAATTATAATTGGAGGATTTGGAAATTGATTAATTCCTTTAATATTAGGAGCCCCAGATATAGCTTTTCCTCGAATAAATAATATAAGATTTTGATTACTTCCCCCTTCATTAACTTTATTAATTTCTAGAAGAATTG????????????????????GGATGAACAGTTTATCCCCCTTTATCATCTAATATTGCTCATAGAGGTAGTTCAGTTGATTTAGCTATTTTTTCTTTACATTTAGCAGGAATTTCATCAATCTTAGGAGCTATTAATTTTATTACAACTATTATTAATATACGAATTAATAATATATCATTTGATCAAATACCTCTTTTTGTATGAGCAGTAGGAATTACTGCATTACTTTTATTATTATCCCTACCTGTATTAGCTGGTGCTATTACTATATTATTAACAGATCGAAATCTTAATACTTCATTTTTTGATCCCGCAGGAGGTGGAGATCCTATTTTATATCAA------

AM231417_W78_parmenides_Fr ACATTATATTTTATTTTTGGTATTTGAGCAGGTATAGTAGGAACCTCTTTAAGATTATTAATTCGTACTGAATTAGGTAATCCTGGATCTTTAATTGGAGATGATCAAATTTATAATACTATTGTAACAGCTCATGCTTTTATTATAATTTTTTTTATAGTTATACCAATTATAATTGGAGGATTTGGAAATTGATTAATTCCTTTAATATTAGGAGCCCCAGATATAGCTTTCCCCCGAATAAATAATATAAGATTTTGATTACTACCCCCTTCATTAACCTTATTAATTTCTAGAAGAATTGTAGAAAATGGAGCAGGAACTGGATGAACAGTTTACCCCCCTTTATCATCTAATATTGCTCATAGAGGAAGTTCAGTTGATTTAGCTATTTTTTCCTTACATTTAGCAGGAATTTCATCAATCTTAGGAGCTATTAATTTTATTACAACTATTATTAATATACGAATTAATCATATATCATTCGATCAAATACCTCTTTTTGTATGAGCAGTAGGAATTACTGCTTTACTCTTATTATTATCATTACCTGTATTAGCTGGTGCTATTACTATATTATTAACAGATCGAAATCTTAATACTTCATTTTTTGATCCAGCAGGGGGTGGTGATCCTATTTTATATCAA------

EU836682_h_1_32_Rus ------------------------------------------------------------------------------------------------------------------------------------------------------------------------------------------------------------------------------------GCTTTTCCTCGAATAAATAATATAAGATTTTGATTACTACCCCCCTCATTAACTTTATTAATTTCTAGAAGAATTGTAGAAAATGGAGCAGGAACAGGATGAACAGTTTATCCCCCTTTATCATCTAATATCGCTCATAGAGGTAGTTCAGTTGATTTAGCTATTTTTTCTTTACATTTAGCAGGAATTTCATCAATCTTAGGAGCTATTAATTTTATTACAACTATTATTAATATACGAATTAACCATATATCATTTGATCAAATACCTCTCTTTGTATGAGCAGTAGGAATTACTGCTTTACTTTTATTATTATCTTTACCTGTATTAGCTGGTGCTATTACTATATTATTAACAGATCGAAATCTTAATACTTCATTTTTTGATCCTGCAGGAGGTGGGGATCCTATTTTATATCAACATTTA

EU836681_h_1_31_Rus ------------------------------------------------------------------------------------------------------------------------------------------------------------------------------------------------------------------------------------GCTTTTCCTCGAATAAATAATATAAGATTTTGATTACTACCCCCCTCATTAACTTTATTAATTTCTAGAAGAATTGTAGAAAATGGAGCAGGAACAGGATGAACAATTTATCCCCCTTTATCATCTAATATCGCTCATAGAGGTAGTTCAGTTGATTTAGCTATTTTTTCTTTACATTTAGCAGGAATTTCATCAATCTTAGGAGCTATTAATTTTATTACAACTATTATTAATATACGAATTAACCATATATCATTTGATCAAATACCTCTCTTTGTATGAGCAGTAGGAATTACTGCTTTACTTTTATTATTATCTTTACCTGTATTAGCTGGTGCTATTACTATATTATTAACAGATCGAAATCTTAATACTTCATTTTTTGATCCTGCAGGAGGTGGGGATCCTATTTTATATCAACATTTA

EU836680_A_Bo_Bu_Cr_Cz_Hu_Sl_Li_Fi_Po_Ru ------------------------------------------------------------------------------------------------------------------------------------------------------------------------------------------------------------------------------------GCTTTTCCTCGAATAAATAATATAAGATTTTGATTACTACCCCCCTCATTAACTTTATTAATTTCTAGAAGAATTGTAGAAAATGGAGCAGGAACAGGATGAACAGTTTATCCCCCTTTATCATCTAATATCGCTCATAGAGGTAGTTCAGTTGATTTAGCTATTTTTTCTTTACATTTAGCAGGAATTTCATCAATCTTAGGAGCTATTAATTTTATTACAACTATTATTAATATACGAATTAACCATATATCATTTGATCAAATACCTCTCTTTGTATGAGCAGTAGGAATTACTGCTTTACTTTTATTATTATCTTTACCTGTATTAGCTGGTGCTATTACTATATTATTAACAGATCGAAATCTTAATACTTCATTTTTTGATCCTGCAGGAGGTGGAGATCCTATTTTATATCAACATTTA

EU836675_h_1_19_It ------------------------------------------------------------------------------------------------------------------------------------------------------------------------------------------------------------------------------------GCTTTCCCTCGAATAAATAATATAAGATTTTGATTACTACCCCCCTCATTAACTTTATTAATTTCTAGAAGAATTGTAGAAAATGGAGCAGGAACAGGATGAACAGTTTATCCCCCTTTATCATCTAATATTGCTCATAGAGGTAGTTCAGTTGATTTAGCTATTTTTTCTTTACATTTAGCAGGAATTTCATCAATCTTAGGAGCTATTAATTTTATTACAACTATTATTAATATACGAATTAACCATATATCATTTGATCAAATACCTCTCTTTGTATGAGCAGTAGGAATTACTGCTTTACTTTTATTATTATCTTTACCTGTATTAGCTGGTGCTATTACTATATTATTAACAGATCGAAATCTTAATACTTCATTTTTTGATCCTGCAGGAGGTGGAGATCCTATTTTATATCAACATTTA

EU836674_h_1_18_At_It ------------------------------------------------------------------------------------------------------------------------------------------------------------------------------------------------------------------------------------GCTTTTCCTCGAATAAATAATATAAGATTTTGATTACTACCCCCCTCATTAACTTTATTAATTTCTAGAAGAATTGTAGAAAATGGAGCAGGAACAGGATGAACAGTTTATCCCCCTTTATCATCTAATATTGCTCATAGAGGTAGTTCAGTTGATTTAGCTATTTTTTCTTTACATTTAGCAGGAATTTCATCAATCTTAGGAGCTATTAATTTTATTACAACTATTATTAATATACGAATTAACCATATATCATTTGATCAAATACCTCTCTTTGTATGAGCAGTAGGAATTACTGCTTTACTTTTATTATTATCTTTACCTGTATTAGCTGGTGCTATTACTATATTATTAACAGATCGAAATCTTAATACTTCATTTTTTGATCCTGCAGGAGGTGGAGATCCTATTTTATATCAACATTTA

EU836672_h_1_10_It ------------------------------------------------------------------------------------------------------------------------------------------------------------------------------------------------------------------------------------GCTTTCCCTCGAATAAATAATATAAGATTTTGATTACTACCCCCCTCATTAACTTTATTAATTTCTAGAAGAATTGTAGAAAATGGGGCAGGAACAGGATGAACAGTTTATCCCCCTTTATCATCTAATATCGCTCATAGAGGTAGTTCAGTTGATTTAGCTATTTTTTCTTTACATTTAGCAGGAATTTCATCAATCTTAGGAGCTATTAATTTTATTACAACTATTATTAATATACGAATTAACCATATATCATTTGATCAAATACCTCTCTTTGTATGAGCAGTAGGAATTACTGCTTTACTTTTATTATTATCTTTACCTGTATTAGCTGGTGCTATTACTATATTATTAACAGATCGAAATCTTAATACTTCATTTTTTGATCCTGCAGGAGGTGGAGATCCTATTTTATATCAACATTTA

EU836671_h_1_09_It ------------------------------------------------------------------------------------------------------------------------------------------------------------------------------------------------------------------------------------GCTTTTCCTCGAATAAATAATATAAGATTTTGATTACTACCCCCCTCATTAACTTTATTAATTTCTAGAAGAATTGTAGAAAATGGGGCAGGAACAGGATGAACAGTTTATCCCCCTTTATCATCTAATATCGCTCATAGAGGTAGTTCAGTTGATTTAGCTATTTTTTCTTTACATTTAGCAGGAATTTCATCAATCTTAGGAGCTATTAATTTTATTACAACTATTATTAATATACGAATTAACCATATATCATTTGATCAAATACCTCTCTTTGTATGAGCAGTAGGAATTACTGCTTTACTTTTATTATTATCTTTACCTGTATTAGCTGGTGCTATTACTATATTATTAACAGATCGAAATCTTAATACTTCATTTTTTGATCCTGCAGGAGGTGGAGATCCTATTTTATATCAACATTTA

EU836670_h_1_07_Gre ------------------------------------------------------------------------------------------------------------------------------------------------------------------------------------------------------------------------------------GCTTTTCCTCGAATAAATAATATAAGATTTTGATTACTACCCCCCTCATTAACTTTATTAATTTCTAGAAGAATTGTAGAAAATGGAGCAGGAACAGGATGAACAATTTATCCCCCTTTATCATCTAATATCGCTCATAGAGGTAGTTCAGTTGATTTAGCTATTTTTTCTTTACATTTAGCAGGAATTTCATCAATCTTAGGGGCTATTAATTTTATTACAACTATTATTAATATACGAATTAACCATATATCATTTGATCAAATACCTCTCTTTGTATGAGCAGTAGGAATTACTGCTTTACTTTTATTATTATCTTTACCTGTATTAGCTGGTGCTATTACTATATTATTAACAGATCGAAATCTTAATACTTCATTTTTTGATCCTGCAGGAGGTGGAGATCCTATTTTATATCAACATTTA

EU836669_h_1_06_Gre ------------------------------------------------------------------------------------------------------------------------------------------------------------------------------------------------------------------------------------GCTTTCCCTCGAATAAATAATATAAGATTTTGATTACTACCCCCCTCATTAACTTTATTAATTTCTAGAAGAATTGTAGAAAATGGAGCAGGAACAGGATGAACAGTTTATCCCCCTTTATCATCTAATATAGCTCATAGAGGTAGTTCAGTTGATTTAGCTATTTTTTCTTTACATTTAGCAGGAATTTCATCAATCTTAGGAGCTATTAATTTTATTACAACTATTATTAATATACGAATTAACCATATATCATTTGATCAAATACCTCTCTTTGTATGAGCAGTAGGAATTACTGCTTTACTTTTATTATTATCTTTACCTGTATTAGCTGGTGCTATTACTATATTATTAACAGATCGAAATCTTAATACTTCATTTTTTGATCCTGCAGGAGGTGGAGATCCTATTTTATATCAACATTTA

EU836668_h_1_05_Gre ------------------------------------------------------------------------------------------------------------------------------------------------------------------------------------------------------------------------------------GCTTTCCCTCGAATAAATAATATAAGATTTTGATTACTACCCCCCTCATTAACTTTATTAATTTCTAGAAGAATTGTAGAAAATGGAGCAGGAACAGGATGAACAGTTTATCCCCCTTTATCATCTAATATCGCTCATAGAGGTAGTTCAGTTGATTTAGCTATTTTTTCTTTACATTTAGCAGGAATTTCATCAATCTTAGGGGCTATTAATTTTATTACAACTATTATTAATATACGAATTAACCATATATCATTTGATCAAATACCTCTCTTTGTATGAGCAGTAGGAATTACTGCTTTACTTTTATTATTATCTTTACCTGTATTAGCTGGTGCTATTACTATATTATTAACAGATCGAAATCTTAATACTTCATTTTTTGATCCTGCAGGAGGTGGAGATCCTATTTTATATCAACATTTA

EU836667_h_1_04_Gre ------------------------------------------------------------------------------------------------------------------------------------------------------------------------------------------------------------------------------------GCTTTCCCTCGAATAAATAATATAAGATTTTGATTACTACCCCCCTCATTAACTTTATTAATTTCTAGAAGAATTGTAGAAAATGGAGCAGGAACAGGATGAACAGTTTATCCCCCTTTATCATCTAATATCGCTCATAGAGGTAGTTCAGTTGATTTAGCTATTTTTTCTTTACATTTAGCAGGAATTTCATCAATCTTAGGGGCTATTAATTTTATTACAACTATTATTAATATACGAATTAACCATATATCATTTGATCAAATACCTCTCTTTGTATGAGCAGTAGGAATTACTGCTTTACTTTTATTATTATCTTTACCCGTATTAGCTGGTGCTATTACTATATTATTAACAGATCGAAATCTTAATACTTCATTTTTTGATCCTGCAGGAGGTGGAGATCCTATTTTATATCAACATTTA

EU836666_h_1_03_Mac ------------------------------------------------------------------------------------------------------------------------------------------------------------------------------------------------------------------------------------GCTTTTCCTCGAATAAATAATATAAGATTTTGATTACTACCCCCCTCATTAACTTTATTAATTTCTAGAAGAATTGTAGAAAATGGAGCAGGAACAGGATGAACAGTTTATCCCCCTTTATCATCTAATATCGCTCATAGAGGTAGTTCAGTTGATTTAGCTATTTTTTCTTTACATTTAGCGGGAATTTCATCAATCTTAGGGGCTATTAATTTTATTACAACTATTATTAATATACGAATTAACCATATATCATTTGATCAAATACCTCTCTTTGTATGAGCAGTAGGAATTACTGCTTTACTTTTATTATTATCTTTACCTGTATTAGCTGGTGCTATTACTATATTATTAACAGATCGAAATCTTAATACTTCATTTTTTGATCCTGCAGGAGGTGGAGATCCTATTTTATATCAACATTTA

EU836665_h_1_02_Gre_Mac ------------------------------------------------------------------------------------------------------------------------------------------------------------------------------------------------------------------------------------GCTTTTCCTCGAATAAATAATATAAGATTTTGATTACTACCCCCCTCATTAACTTTATTAATTTCTAGAAGAATTGTAGAAAATGGAGCAGGAACAGGATGAACAGTTTATCCCCCTTTATCATCTAATATCGCTCATAGAGGTAGTTCAGTTGATTTAGCTATTTTTTCTTTACATTTAGCAGGAATTTCATCAATCTTAGGGGCTATTAATTTTATTACAACTATTATTAATATACGAATTAACCATATATCATTTGATCAAATACCTCTCTTTGTATGAGCAGTAGGAATTACTGCTTTACTTTTATTATTATCTTTACCTGTATTAGCTGGTGCTATTACTATATTATTAACAGATCGAAATCTTAATACTTCATTTTTTGATCCTGCAGGAGGTGGAGATCCTATTTTATATCAACATTTA

EU836664_h_2_06_At_It ------------------------------------------------------------------------------------------------------------------------------------------------------------------------------------------------------------------------------------GCTTTTCCTCGAATAAATAATATAAGATTTTGATTGCTACCCCCCTCATTAACTTTATTAATTTCTAGAAGAATTGTAGAAAATGGAGCAGGAACAGGATGAACAGTTTATCCCCCTTTATCATCTAATATCGCTCATAGAGGTAGTTCAGTTGATTTAGCTATTTTTTCTTTACATTTAGCAGGAATTTCATCAATCTTAGGAGCTATTAATTTTATTACAACTATTATTAATATACGAATTAACCATATATCATTTGATCAAATACCTCTCTTTGTATGAGCAGTAGGAATTACTGCTTTACTTTTATTATTATCTTTACCTGTATTAGCTGGTGCTATTACTATATTATTAACAGATCGAAATCTTAATACTTCATTTTTTGATCCTGCAGGAGGTGGAGATCCTATTTTATATCAACATTTA

EU836663_h_2_05_It ------------------------------------------------------------------------------------------------------------------------------------------------------------------------------------------------------------------------------------GCTTTCCCTCGAATAAATAATATAAGATTTTGATTGCTACCCCCCTCATTAACTTTATTAATTTCTAGAAGAATTGTAGAAAATGGAGCAGGAACAGGATGAACAGTTTATCCCCCTTTATCATCTAATATCGCTCATAGAGGTAGTTCAGTTGATTTAGCTATTTTTTCTTTACATTTAGCAGGAATTTCATCAATCTTAGGAGCTATTAATTTTATTACAACTATTATTAATATACGAATTAACCATATATCATTTGATCAAATACCTCTCTTTGTATGAGCAGTAGGAATTACTGCTTTACTTTTATTATTATCTTTACCTGTATTAGCTGGTGCTATTACTATATTATTAACAGATCGAAATCTTAATACTTCATTTTTTGATCCTGCAGGAGGTGGAGATCCTATTTTATATCAACATTTA;

END;

begin mrbayes;

set autoclose=yes nowarn=yes;

partition ancstates = 2: 1, 2-655;

set partition=ancstates;

lset applyto=(2) rates=invgamma nst=6;

unlink statefreq=(all) revmat=(all) shape=(all) pinvar=(all);

prset ratepr=variable;

constraint stubbendorfii_clade= Parnassius_stubbendorfii_2005_LOWA_815 Parnassius_stubbendorfii_2005_LOWA_154 Parnassius_stubbendorfii_2005_LOWA_153 Parnassius_glacialis_mikado Parnassius_stubbendorfii_hoenei Parnassius_stubbendorfii_hoenei_AC20_16 Parnassius_stubbendorfii_koreanus;

prset topologypr=constraints(stubbendorfii_clade);

report applyto=(1) ancstates=yes;

mcmcp ngen= 100000 relburnin=yes burninfrac=0.25 printfreq=100 samplefreq=100 nchains=4 savebrlens=yes;

mcmc;

sump;

end;
